# Supplementary material for: Characteristics of miRNAs Present in Bovine Sperm and Associations With Differences in Fertility
Source: Front Endocrinol (Lausanne). 2022 May 19;13:874371. doi: 10.3389/fendo.2022.874371 (PMC9160602; doi:10.3389/fendo.2022.874371)
Supplement: Supplementary file 1 [file Table_1.xlsx]

## Sheet: S1
Bovine annotation	Human homolog
let-7a-2-5p	hsa-let-7a-5p
let-7a-5p	hsa-let-7a-5p
let-7c-5p	hsa-let-7c-5p
let-7f	hsa-let-7f-5p
miR-100-5p;	hsa-miR-100-5p
miR-101-2-3p	hsa-miR-101-3p
miR-10161-3p
miR-103	hsa-miR-103a-3p
miR-1249-3p	hsa-miR-1249-3p
miR-125b-2-5p	hsa-miR-125b-5p
miR-125b-2-5p	hsa-miR-125b-5p
miR-1260b-5p	hsa-miR-1260b
miR-1260b-5p	hsa-miR-1260b
miR-1260b-5p	hsa-miR-1260b
miR-128-1-3p	hsa-miR-128-3p
miR-128-1-3p;miR-128-2-3p	hsa-miR-128-3p
miR-128-1-3p;miR-128-2-3p	hsa-miR-128-3p
miR-1306	hsa-miR-1306-5p
miR-151-3p	hsa-miR-151a-3p
miR-16b-3p	hsa-miR-16-5p
miR-16b-3p	hsa-miR-16-5p
miR-191-5p;	hsa-miR-191-5p
miR-192-5p	hsa-miR-192-5p
miR-204-3p	hsa-miR-204-3p
miR-21-5p;	hsa-miR-21-5p
miR-215-5p	hsa-miR-215-5p
miR-216b-5p	hsa-miR-216b-5p
miR-2285aj-5p
miR-30d-5p	hsa-miR-30d-5p
miR-30d-5p;	hsa-miR-30d-5p
miR-320a-2-3p;miR-320a-1-3p	hsa-miR-320a-3p
miR-335-3p	hsa-miR-340-3p
miR-34b-3p;	hsa-miR-34b-3p
miR-369-3p	hsa-miR-369-3p
miR-409a-3p	hsa-miR-409-3p
miR-543	hsa-miR-543
miR-6529-5p	hsa-miR-6529-5p
miR-664b-3p	hsa-miR-664b-3p
miR-664b-5p	hsa-miR-664b-3p
miR-7859
miR-92a-1-3p;miR-92a-2-3p	hsa-miR-92a-3p
mmu-mir-5126-3p	hsa-miR-3960
mmu-mir-5126-3p	hsa-miR-3960

## Sheet: S2
miRNA	baseMean	SD	SD/baseMean	highMean	lowMean	highSEM	lowSEM	log2FoldChange	lfcSE	pvalue	padj	H1	H2	H3	H4	H5	H6	H7	L1	L2	L3	L4	L5	L6
miR-2450c-3p	2.9763	9.47623	3.18389	5.52742	0	4.49144	0	-0.0020825	0.0824352	3.10092e-18	4.43741e-15	34.538	0	0	1.42918	2.72471	0	0		0	0	0	0	0
miR-2311-5p	2.20265	4.84552	2.19986	4.09064	0	2.26403	0	-0.00203008	0.0824345	2.37524e-17	1.58511e-14	14.2538	12.7458	0	0	1.63483	0	0	0	0	0	0	0	0
ppc-mir-2274-5p	0.867007	2.0735	2.39156	1.61016	0	0.984744	0	-0.00188749	0.0824279	3.32309e-17	1.58511e-14	7.67512	1.4162	0	0	2.17977	0	0	0	0	0	0	0	0
miR-409a-3p	43.4313	31.6845	0.729533	60.3175	23.7307	11.342	8.2035	-0.0241116	0.0874022	3.83719e-05	0.0137275	66.335	19.1188	51.9128	48.5921	125.882	52.8952	57.4866	48.0234	0	20.7707	21.596	50.9555	1.03882
miR-543	97.1451	82.6926	0.851227	135.966	51.8537	33.3634	17.8689	-0.0217634	0.0864493	6.17703e-05	0.0176786	293.299	186.939	24.4295	92.8967	207.078	78.5414	68.5806	117.55	0	41.5414	93.9828	57.0096	1.03882
miR-199b-3p;miR-199a-2-3p;miR-199a-1-3p	34.5216	27.0755	0.784307	40.1921	27.9061	10.3968	10.2005	-0.013747	0.0839582	0.000266301	0.0635128	37.2792	0.708102	12.2148	27.1544	51.7695	70.5269	81.6916	24.3701	0	50.0627	68.7874	24.2165	0
miR-2888-1-3p	7.89184	9.17869	1.16306	13.8311	0.96269	3.36199	0.420987	-0.0173328	0.085021	0.00054833	0.112094	10.9645	2.83241	6.10738	17.1502	9.26402	19.2346	31.2647	0	0	2.66291	1.59971	1.51353	0
rno-mir-678-3p	46.5619	64.7097	1.38975	26.8279	69.585	9.86451	34.8652	0.00944598	0.0831086	0.000961096	0.146802	0	78.5994	21.3758	45.7337	5.99437	32.0577	4.03415	30.1042	245.831	39.411	99.5817	0.504509	2.07763
miR-125a	42.2782	87.5475	2.07075	63.2718	17.7857	42.7875	9.49727	-0.00493743	0.0825765	0.00102587	0.146802	17.5431	0	24.4295	27.869	13.0786	339.812	20.1708	23.6533	0	65.5075	0.399927	17.1533	0
rno-mir-3586-3p	29.1144	54.6177	1.87597	8.14917	53.5739	3.4229	29.5991	0.0104758	0.0833193	0.00093694	0.146802	0.548223	0.708102	27.4832	12.148	6.53931	9.61731	0	40.139	210.712	22.3684	0.799853	47.4239	0
miR-323	70.8594	75.4845	1.06527	109.283	26.0319	31.6967	8.25296	-0.0205866	0.0859378	0.0020196	0.186685	182.01	281.825	67.1812	60.7401	70.2976	81.7471	21.1793	37.2719	0	60.7143	28.7947	24.2165	5.19409
mmu-mir-3960-3p	60.9789	48.019	0.787469	58.3772	64.0142	19.0836	18.2788	0.040988	0.0972229	0.00183653	0.186685	13.1573	159.323	106.879	52.165	25.0674	28.8519	23.1964	30.821	140.475	34.0852	46.3915	22.1984	110.115
mmu-mir-2137-3p	56.0947	51.753	0.9226	75.2365	33.7627	21.3805	13.8068	-0.00856007	0.0829405	0.00195171	0.186685	53.7258	46.0267	39.698	67.1714	12.5337	195.552	111.948	0.716767	0	74.5614	59.1891	68.1088	0
miR-221-3p	36.3922	110.073	3.02463	64.4222	3.69055	54.4742	2.28609	-0.00308215	0.0824725	0.00208733	0.186685	2.19289	0	27.4832	0.71459	3.8146	416.75	0	15.0521	0	0.532582	0	6.55862	0
hsa-mir-4313-5p	18.0128	29.1226	1.61677	15.6898	20.723	11.2775	11.4405	0.00714124	0.0828047	0.00193643	0.186685	0	87.8047	12.2148	0	9.80897	0	0	4.3006	81.9436	14.3797	0	6.05411	17.6599
mmu-mir-7050-5p	12.1985	22.9442	1.8809	22.6544	0	10.2873	0	-0.0085745	0.0830483	0.00160754	0.186685	5.48223	80.0156	6.10738	13.5772	0	8.01442	45.3842	0	0	0	0	0	0
miR-331-5p	26.7736	28.472	1.06343	41.0904	10.0707	9.58165	9.02341	-0.00632597	0.0826997	0.00357728	0.222569	37.2792	0.708102	51.9128	64.3131	13.0786	41.675	78.6659	59.4917	0	0.532582	0.399927	0	0
nle-mir-1260b-5p	14.7796	33.3509	2.25655	4.07394	27.2694	1.41599	18.7255	0.0100769	0.0832565	0.00286589	0.222569	0	0	6.10738	10.0043	5.99437	6.41154	0	0	128.768	20.7707	2.79949	5.04509	6.2329
pxy-mir-6497-5p;bmo-mir-6497-5p	13.438	24.5437	1.82643	14.1775	12.5754	11.7176	5.51509	0.00154581	0.082411	0.00347323	0.222569	0	89.929	6.10738	0	0	3.20577	0	0	11.7062	6.39098	39.1928	18.1623	0
oan-mir-1385-3p	10.7199	30.7773	2.87103	0.825107	22.2639	0.575798	17.3309	0.00884791	0.0830897	0.00319013	0.222569	0	1.4162	0	0	4.35954	0	0	5.73414	117.062	4.79323	0.799853	0	5.19409
hsa-mir-3620-5p	9.84757	30.9699	3.14493	0.754729	20.4559	0.383477	17.6443	0.00853586	0.0830438	0.00311083	0.222569	0	1.4162	0	2.85836	0	0	1.00854	0	117.062	3.19549	0.399927	0	2.07763
eca-mir-9068-5p	8.40881	14.6481	1.74199	15.5592	0.0666544	6.41075	0.0608469	-0.00925397	0.0831394	0.00328144	0.222569	7.1269	19.8269	12.2148	11.4334	3.8146	54.4981	0	0	0	0	0.399927	0	0
gga-mir-762-3p	4.17034	4.84185	1.16102	7.59652	0.173136	1.60249	0.158051	-0.0117226	0.0836065	0.00341418	0.222569	12.0609	1.4162	6.10738	2.14377	8.71908	9.61731	13.111	0	0	0	0	0	1.03882
miR-181d-5p	14.1591	16.1013	1.13717	25.3385	1.1165	5.45641	0.664613	-0.0103581	0.0833119	0.00385243	0.229701	28.5076	29.7403	15.2685	28.5836	23.9775	51.2923	0	0	0	2.66291	0	4.03608	0
let-7f-2-3p	15.206	15.7184	1.0337	8.95496	22.499	3.42988	7.53291	0.00365316	0.0824749	0.00410943	0.235224	0	19.1188	24.4295	12.148	2.17977	4.80865	0	43.7228	23.4124	14.9123	48.7911	0	4.15527
miR-11977-3p	128.497	63.9844	0.497946	156.199	96.1777	24.8927	17.6543	-0.0264128	0.0880007	0.00522811	0.287747	152.954	172.777	85.5034	157.21	117.708	301.342	105.896	141.92	58.5311	100.658	131.576	123.605	20.7763
oan-mir-1351-3p	11.4408	37.301	3.26035	0	24.7884	0	21.1493	0.00413048	0.0825538	0.00595728	0.315736	0	0	0	0	0	0	0	0	140.475	7.45614	0.799853	0	0
miR-34c-3p	131.324	73.0035	0.555904	172.948	82.7623	21.7771	23.4332	-0.0380474	0.0949344	0.00622513	0.318149	296.04	197.561	109.933	170.787	142.775	171.509	122.033	194.244	0	87.876	75.5861	64.0727	74.7948
hsa-mir-6786-3p	14.062	36.8689	2.62188	2.20293	27.8976	1.60043	20.6912	0.00604597	0.0827148	0.00655412	0.323412	0	0	12.2148	0	0	3.20577	0	12.9018	140.475	0	0	0.504509	13.5046
mmu-mir-8112-5p	73.5167	103.337	1.40563	46.9527	104.508	10.9652	58.2685	0.0225894	0.086693	0.00719294	0.343103	6.03045	53.1077	97.7181	52.165	15.8033	35.2635	68.5806	10.0347	421.424	52.193	62.7885	31.7841	48.8244
miR-154-3p	50.1064	46.5114	0.928254	65.0851	32.6312	16.1618	18.1974	-0.010803	0.0833122	0.00744503	0.343672	82.7817	54.5239	18.3222	32.8711	81.7414	32.0577	153.298	118.983	0	10.1191	0	63.5682	3.11645
miR-323-3p	131.5	53.1571	0.404237	158.796	99.6536	12.942	21.8745	-0.0236327	0.086694	0.00949086	0.38815	160.629	220.22	167.953	140.06	159.123	96.1731	167.417	115.4	35.1187	117.168	165.17	144.29	20.7763
hsa-mir-4497-5p	30.1766	53.5403	1.77423	42.0517	16.3223	25.9032	7.90342	-0.00297292	0.0824525	0.00942705	0.38815	0	29.7403	18.3222	21.4377	11.4438	208.375	5.04269	7.88444	0	3.72807	38.393	47.9284	0
cgr-mir-1285-5p	14.3342	14.8911	1.03886	22.0914	5.28412	6.02682	2.29888	-0.00665259	0.0827214	0.00949354	0.38815	4.38578	0	24.4295	25.0106	14.1685	43.2779	43.3671	0.716767	0	9.05389	6.79875	15.1353	0
miR-484	13.7275	31.1356	2.26812	21.5005	4.65899	15.0068	4.25305	-0.00132077	0.0824083	0.00877779	0.38815	0	0	9.16108	22.1523	2.17977	117.011	0	27.9539	0	0	0	0	0
miR-132-5p	450.355	136.386	0.302841	540.737	344.908	40.3436	32.5593	-0.0815565	0.148036	0.00999894	0.397458	713.786	493.547	555.772	388.022	599.982	615.508	418.543	377.02	210.712	361.623	285.148	466.167	368.78
lgi-mir-100-5p	591.046	604.971	1.02356	324.432	902.095	52.8192	313.718	0.958551	0.806177	0.0106906	0.402586	620.04	232.258	378.658	337.286	315.522	152.274	234.989	673.761	2563.66	813.785	338.338	288.579	734.444
miR-502b-3p	17.4419	15.5578	0.891976	26.6663	6.68017	4.43408	4.9796	-0.00523764	0.0825794	0.0105437	0.402586	4.93401	26.9079	24.4295	22.1523	38.146	44.8808	25.2134	33.6881	0	4.79323	1.59971	0	0
let-7d-3p	419.844	165.126	0.393303	506.437	318.819	63.2768	35.177	-0.04218	0.0970206	0.0124568	0.419321	407.33	574.271	442.785	285.836	375.465	807.854	651.515	464.465	245.831	296.115	385.529	316.327	204.647
miR-92a-2-3p	51.6411	62.9355	1.21871	74.293	25.2139	27.4863	13.632	-0.00627972	0.0826649	0.0131862	0.419321	9.86801	41.0699	112.987	32.1565	47.41	237.227	39.333	96.0468	0	30.8897	1.99963	17.1533	5.19409
hsa-mir-6125-3p	35.1922	111.662	3.17293	2.7751	73.0122	2.30793	63.6594	0.00289004	0.0824734	0.0122367	0.419321	0	17.7026	0	0.71459	0	0	1.00854	0	421.424	0	0	16.6488	0
miR-505-3p	29.2873	26.4979	0.904756	34.1129	23.6576	10.2767	9.99955	-0.00424493	0.0825023	0.0121673	0.419321	29.604	0	24.4295	32.8711	47.41	91.3644	13.111	36.5551	0	46.8672	0	58.5231	0
miR-374c-5p	19.321	22.7738	1.17871	7.83801	32.7177	3.03589	10.9176	0.0122364	0.0835992	0.013129	0.419321	0	12.0377	3.05369	4.28754	11.4438	24.0433	0	31.5378	0	14.3797	54.79	16.6488	78.9501
ppy-mir-1303-5p	8.92032	21.5499	2.41582	3.30471	15.4719	1.98065	12.2096	0.00587184	0.0826755	0.0128653	0.419321	0	0	15.2685	5.71672	0.544943	1.60288	0	9.31797	81.9436	1.06516	0	0.504509	0
oan-mir-150-5p	5.93748	15.4174	2.59663	8.17012	3.33272	7.39726	3.04235	-0.000753021	0.0823989	0.0114357	0.419321	0	0	0	0	1.08989	56.101	0	0	0	0	19.9963	0	0
miR-200a-5p	117.352	55.1818	0.470224	143.64	86.6829	15.1461	22.2757	-0.0261089	0.0878645	0.0151459	0.471169	160.629	92.0533	174.06	142.203	176.561	184.332	75.6403	78.1276	0	101.191	161.97	136.218	42.5915
miR-185	32.1738	18.9421	0.588742	36.6474	26.9547	4.81096	9.46745	-0.0109132	0.0832207	0.0162593	0.495043	41.1167	43.1943	18.3222	33.5857	28.337	30.4548	61.5208	33.6881	0	48.9975	17.9967	61.0456	0
dps-mir-2543b-2-5p	13.3215	37.2937	2.79951	3.59109	24.6737	3.21677	21.1723	0.0039419	0.0825304	0.0167428	0.499145	0	0.708102	24.4295	0	0	0	0	0	140.475	0	0	7.56764	0
gmo-mir-11190-3p	142.76	126.065	0.883054	110.764	180.089	20.4482	68.8366	0.0197449	0.0854276	0.0183886	0.529761	16.4467	192.604	152.685	146.491	71.9324	99.3789	95.8111	65.2258	58.5311	50.5953	438.72	70.6313	396.828
mmu-mir-8109-5p	8.67689	20.4542	2.35732	11.4603	5.42963	10.0696	3.13111	-0.00299165	0.0824611	0.0185102	0.529761	0	0	0	3.57295	0	0	76.6489	2.86707	0	8.52131	0	21.1894	0
miR-222-3p	57.8927	188.345	3.25334	104.54	3.47047	93.4503	2.58285	-0.00183922	0.0824196	0.0201528	0.554789	1.64467	0	9.16108	0	10.8989	710.078	0	0	0	17.5752	1.19978	1.00902	1.03882
dno-mir-30b-3p	10.5288	18.2813	1.73632	6.89214	14.7715	2.63626	10.2788	0.00447998	0.0825409	0.02016	0.554789	0	14.8702	15.2685	14.2918	3.8146	0	0	11.4683	70.2373	6.92356	0	0	0
mmu-mir-690-3p	10.5335	16.7566	1.5908	7.14804	14.4831	4.32282	8.43393	0.00247869	0.0824184	0.0206606	0.557836	0	30.4484	0	18.5793	0	0	1.00854	0.716767	0	9.58647	59.5891	4.54058	12.4658
miR-27b-3p;miR-27a-3p	64.7115	46.0586	0.711753	91.6909	33.2356	15.5614	11.3929	-0.0128192	0.0835358	0.0218654	0.579434	60.8527	157.907	152.685	50.0213	78.4717	75.3356	66.5635	17.9192	0	36.7481	60.7889	76.6854	7.27172
gga-mir-6547-5p	8.34722	11.5966	1.38928	11.9329	4.16397	4.7548	3.51771	-0.0078118	0.0828576	0.0227505	0.591926	7.1269	20.535	6.10738	0.71459	4.90448	4.80865	39.333	0	23.4124	0.532582	0	0	1.03882
miR-543-3p	237.572	127.121	0.535081	302.893	161.365	51.6642	20.119	-0.0348921	0.0923452	0.0257983	0.603647	412.812	415.656	167.953	126.482	425.055	142.657	429.637	246.568	93.6498	143.264	182.367	121.587	180.754
miR-24-1-3p	25.3667	18.8181	0.741844	34.5102	14.6992	7.66145	3.57223	-0.0174122	0.0847016	0.0257954	0.603647	36.1827	40.3618	9.16108	30.0128	33.7864	76.9385	15.1281	23.6533	0	16.51	25.5953	14.1263	8.31054
pma-mir-30b-5p	23.1031	32.8637	1.42248	14.257	33.4237	5.85231	17.6188	0.015015	0.0841949	0.0261189	0.603647	8.77157	51.6915	9.16108	7.1459	11.9887	8.01442	3.02561	7.16767	128.768	19.7055	25.9952	10.5947	8.31054
miR-3431	11.5948	8.73104	0.753013	15.0496	7.56419	3.04509	3.14299	-0.00676251	0.0827193	0.0261538	0.603647	18.6396	0	6.10738	16.4356	18.528	22.4404	23.1964	0	0	17.5752	15.1972	12.6127	0
miR-139-3p	11.4155	12.7106	1.11345	18.6455	2.98053	4.8503	2.07318	-0.00656528	0.082716	0.0258498	0.603647	12.6091	0.708102	21.3758	20.7231	4.35954	38.4692	32.2732	0	0	13.8471	0	4.03608	0
aae-mir-309b-5p	8.96991	24.6282	2.74564	1.33958	17.872	0.850324	13.9111	0.00448656	0.0825664	0.0255527	0.603647	0	0	6.10738	0	3.26966	0	0	3.58384	93.6498	0	9.99817	0	0
efu-mir-9193-2-5p	3.87485	12.5906	3.24932	6.77755	0.488363	6.27479	0.322622	0.000277855	0.0823956	0.0236364	0.603647	0	47.4429	0	0	0	0	0	0	0	2.13033	0.799853	0	0
abu-mir-140-3p_nbr-mir-140_stem-loop_pny-mir-140_stem-loop	3.21217	10.4365	3.24906	5.82131	0.16817	5.17426	0.153517	-0.00197018	0.0824307	0.0267275	0.607097	0	1.4162	0	0	0	0	39.333	0	0	0	0	1.00902	0
miR-217-3p	3.98744	6.1892	1.55217	7.40524	0	2.55875	0	-0.0072051	0.0828333	0.0272964	0.610331	1.64467	21.9512	6.10738	0.71459	2.72471	9.61731	9.07684	0	0	0	0	0	0
hsa-mir-4485-3p	473.161	243.169	0.513924	588.36	338.763	85.389	76.405	-0.0193262	0.0849971	0.0296743	0.643149	590.984	739.259	781.745	255.109	723.684	234.021	793.719	221.481	292.656	685.433	445.918	294.634	92.4547
miR-378	13.9482	29.5482	2.11843	20.0912	6.78132	14.482	3.7315	-0.00288774	0.082457	0.0305619	0.643149	0	1.4162	0	4.28754	0.544943	112.202	22.1878	15.7689	0	22.901	0	2.01804	0
mmu-mir-1906-1-5p_mmu-mir-1906-2_stem-loop	11.8212	27.5035	2.32662	15.323	7.73581	12.6592	7.0618	0.000655555	0.0824	0.0304491	0.643149	0	97.01	9.16108	0	1.08989	0	0	0	0	0	0	46.4149	0
miR-2285cb-5p	3.91803	5.8581	1.49517	7.27634	0	2.36933	0	-0.00482407	0.0826011	0.029355	0.643149	3.83756	0	0	5.71672	9.80897	14.426	17.1451	0	0	0	0	0	0
ppa-mir-151-3p_nle-mir-151_stem-loop_pha-mir-151_stem-loop	13.7803	11.7835	0.855097	9.67145	18.574	3.72599	4.91239	0.0136292	0.0838207	0.0311761	0.646565	2.19289	2.12431	30.5369	6.43131	11.9887	14.426	0	6.4509	35.1187	20.7707	8.79839	7.06313	33.2421
miR-497-5p	27.9987	17.7682	0.634608	41.3441	12.4291	3.94	4.22421	-0.0128648	0.0836154	0.0317097	0.648237	25.7665	43.1943	45.8054	52.8796	29.4269	36.8664	55.4696	18.6359	0	25.5639	0.399927	22.7029	7.27172
miR-2284y-1-5p	962.496	198.63	0.206369	1068.83	838.441	73.0191	47.1866	-0.0801244	0.134272	0.0330815	0.661533	1494.46	970.809	1120.7	994.709	1059.91	1016.23	824.984	921.046	632.136	975.689	775.458	921.234	805.083
miR-2285e-2-3p	20.0464	16.9316	0.84462	32.3056	5.74403	5.09831	2.19739	-0.0160175	0.0844998	0.0332847	0.661533	38.3756	33.9889	42.7517	5.71672	27.7921	51.2923	26.222	7.16767	0	2.66291	0	10.0902	14.5434
miR-2326-5p	7.19604	21.6341	3.00639	1.55546	13.7767	0.72044	12.446	0.00485952	0.0826007	0.0345144	0.676576	0	2.83241	3.05369	5.00213	0	0	0	0.716767	81.9436	0	0	0	0
miR-106-5p;miR-17-5p	19.831	27.3129	1.37729	16.6894	23.4962	7.82933	13.4831	-0.00243156	0.0824257	0.0353569	0.683726	6.03045	0	9.16108	15.721	21.7977	64.1154	0	93.1797	0	18.6404	0.399927	28.757	0
miR-24-1-3p;miR-24-2-3p	88.8065	41.1702	0.463594	115.78	57.337	12.4177	9.78086	-0.034681	0.0918845	0.0376059	0.698884	108	143.037	73.2886	112.905	71.3875	166.7	135.144	82.4282	11.7062	60.1817	49.5909	57.0096	83.1054
miR-361-5p	35.5581	22.9465	0.645325	40.9677	29.2468	9.40589	7.5758	-0.00999848	0.0831077	0.0369937	0.698884	23.5736	0	30.5369	52.165	34.3314	70.5269	75.6403	57.3414	11.7062	46.8672	31.1943	24.2165	4.15527
miR-105b-5p	16.532	15.635	0.945747	16.4286	16.6526	4.78734	7.55486	-0.00545392	0.0825714	0.0371548	0.698884	27.9594	0	12.2148	9.28967	27.2471	35.2635	3.02561	47.3066	0	35.683	2.79949	14.1263	0
miR-22-5p	20.0183	17.6716	0.882772	27.4546	11.3426	5.8134	6.5934	-0.00332313	0.0824501	0.0384826	0.706007	13.7056	0	21.3758	39.3024	35.4213	48.0865	34.2903	0	0	37.2807	0	30.7751	0
oga-mir-100-5p	258.914	135.27	0.522449	186.492	343.407	17.5065	63.0929	0.0338794	0.0912405	0.0415599	0.711643	251.086	186.231	207.651	231.527	184.736	128.231	115.982	247.285	632.136	421.805	368.732	197.263	193.22
mmu-mir-6412-3p	162.091	150.713	0.929801	228.403	84.7282	64.7823	25.2515	-0.0143811	0.0839091	0.0417736	0.711643	59.2081	104.091	216.812	186.508	114.438	601.082	316.681	49.4569	105.356	17.5752	66.3878	210.38	59.2126
let-7a-2-5p;let-7e-5p;let-7a-3-5p	12.6971	12.3306	0.97114	14.8825	10.1474	4.78405	4.6627	-0.00756386	0.0828108	0.0397995	0.711643	15.3502	0	0	12.8626	14.7135	40.0721	21.1793	32.2545	0	16.51	1.99963	9.08117	1.03882
ipu-mir-7550-5p	8.09383	22.8175	2.81913	15.0314	0	11.101	0	-0.00349726	0.0825051	0.0409438	0.711643	3.83756	0	6.10738	0	8.71908	86.5558	0	0	0	0	0	0	0
hsa-mir-5003-3p	6.66162	14.3354	2.15193	12.3716	0	6.66555	0	-0.00522337	0.0826319	0.0407246	0.711643	6.03045	54.5239	6.10738	0	8.71908	11.2202	0	0	0	0	0	0	0
miR-2284ab	4.99025	8.78509	1.76045	4.4844	5.58042	3.48359	3.35326	0.000778736	0.0824006	0.0400835	0.711643	0	26.9079	3.05369	1.42918	0	0	0	0	0	0	12.7977	20.6849	0
miR-154b-3p	20.4081	25.9506	1.27158	20.7968	19.9546	9.15356	11.3612	-0.00654202	0.0826825	0.043823	0.7121	68.5279	0.708102	9.16108	1.42918	8.17414	46.4837	11.0939	20.7862	0	20.2381	0	78.7035	0
mmu-mir-6937-5p	13.8299	31.4963	2.27741	18.739	8.10256	15.2079	5.76883	-0.00195752	0.0824244	0.0442886	0.7121	0	0	0	8.57508	0.544943	117.011	5.04269	9.31797	0	0	38.7929	0.504509	0
mmu-mir-6982-5p	11.5566	18.1537	1.57085	20.0327	1.66779	8.00941	1.1926	-0.00591383	0.0826646	0.0434808	0.7121	14.802	0	58.0201	17.1502	3.26966	1.60288	45.3842	0	0	7.98872	0	2.01804	0
hsa-mir-4472-1-3p	5.9046	12.4895	2.11521	10.7601	0.239791	5.83684	0.157593	-0.00546037	0.082652	0.0436691	0.7121	2.74111	0	27.4832	2.14377	0	1.60288	41.35	0	0	0	0.399927	0	1.03882
miR-2285be-3p	3.97745	7.86742	1.97801	6.70539	0.794848	3.73607	0.466507	-0.00619253	0.0827019	0.0431714	0.7121	1.09645	2.83241	0	0.71459	11.4438	1.60288	29.2476	0	0	1.06516	3.19941	0.504509	0
miR-335-3p	207.422	93.9844	0.453108	248.16	159.893	31.4144	33.8716	-0.0270045	0.0878418	0.0447906	0.71217	413.908	268.371	238.188	233.671	275.196	182.729	125.059	74.5438	175.593	169.894	150.372	319.354	69.6007
miR-361-3p	41.4364	24.0359	0.580068	46.9755	34.9741	6.77034	11.5459	-0.0191839	0.0851196	0.0452955	0.712284	75.1065	27.616	30.5369	52.8796	25.0674	56.101	61.5208	53.7575	0	52.193	78.7856	11.6037	13.5046
miR-1306	1790.09	662.536	0.370113	1550.93	2069.11	195.282	287.242	0.0458015	0.0987906	0.0462747	0.716379	1240.63	2543.5	1328.36	1509.21	868.639	1340.01	2026.15	1200.58	3289.45	1485.9	2099.61	1742.07	2597.04
miR-10174-5p	3.77636	7.11822	1.88494	7.01323	0	3.19371	0	-0.00355079	0.0825091	0.0465571	0.716379	17.5431	0	0	5.00213	4.35954	0	22.1878	0	0	0	0	0	0
mmu-mir-5119-3p	94.105	105.216	1.11807	88.5071	100.636	31.287	51.4986	0.0107708	0.0832486	0.0472727	0.719652	17.5431	221.636	210.705	77.8903	25.0674	38.4692	28.2391	0	374.599	51.6604	77.1858	83.7486	16.6211
miR-382-5p	13.8551	17.4332	1.25825	22.8839	3.32155	7.20429	2.18186	-0.00555135	0.0826345	0.0489502	0.737344	42.7614	0	39.698	22.1523	8.17414	0	47.4013	0	0	14.3797	0	5.5496	0
miR-656	4.53461	7.69101	1.69607	8.42142	0	3.31922	0	-0.00350521	0.0825071	0.049651	0.74011	16.4467	20.535	0	0	3.8146	0	18.1537	0	0	0	0	0	0
miR-378-3p	11.5707	10.2441	0.885343	14.5167	8.1337	4.37099	2.86949	-0.0044106	0.0824887	0.0501853	0.740363	2.74111	2.83241	12.2148	38.5878	19.073	8.01442	18.1537	17.2024	0	17.0426	7.99853	6.55862	0
miR-6123-5p	703.071	240.093	0.341492	538.887	894.618	59.4308	68.2066	0.0510977	0.102748	0.0523975	0.749808	767.512	390.873	387.819	329.426	581.454	690.843	624.285	952.584	866.261	792.481	609.888	1010.03	1136.47
miR-26a-1-5p;miR-26a-2-5p;miR-26b-5p	9.03531	10.6268	1.17614	13.4427	3.89332	4.60502	1.9319	-0.00565873	0.0826272	0.0519772	0.749808	1.09645	0	0	20.7231	23.9775	16.0288	32.2732	2.86707	0	3.72807	1.59971	14.1263	1.03882
miR-499-5p	8.54863	13.7093	1.60368	14.5404	1.55823	6.10443	1.42246	-0.00855695	0.0829875	0.0515926	0.749808	5.48223	52.3996	9.16108	16.4356	7.08425	11.2202	0	0	0	0	0	0	9.34935
miR-215-5p	389.184	145.595	0.374104	306.915	485.164	32.2451	58.2086	0.0369386	0.0923806	0.0586303	0.762727	291.655	257.041	259.564	356.58	483.364	304.548	195.656	637.206	725.786	429.261	368.332	374.346	376.052
pal-mir-9997-5p	225.685	208.239	0.922696	138.818	327.031	34.4476	104.234	0.0252768	0.0874995	0.056578	0.762727	273.563	59.4806	287.047	83.607	91.5504	62.5125	113.965	305.343	842.848	182.143	79.1855	140.254	412.41
miR-2285bu-1-5p;miR-2285au-5p;miR-2285ao-3-5p	27.7577	15.2337	0.548811	27.6794	27.8491	2.70571	8.59272	-0.00871831	0.0828124	0.0574982	0.762727	43.3096	28.3241	24.4295	25.0106	28.882	25.6462	18.1537	40.139	0	33.5526	36.3933	57.0096	0
miR-92b-3p	15.5605	26.7354	1.71816	26.0657	3.30449	12.4154	1.34727	-0.00945225	0.0830972	0.0569439	0.762727	14.2538	1.4162	21.3758	21.4377	1.63483	104.188	18.1537	3.58384	0	6.92356	0	1.00902	8.31054
miR-502a-2-3p;miR-500-3p;miR-502a-1-3p	12.317	9.57587	0.777454	12.8527	11.692	2.68806	4.81218	-0.00767933	0.0827584	0.0543215	0.762727	23.0254	0.708102	15.2685	7.86049	15.8033	19.2346	8.0683	12.185	0	16.51	34.3937	7.06313	0
miR-2285q-3p	8.78675	8.76176	0.997156	10.511	6.77515	3.49589	3.13608	-0.00662053	0.0827131	0.0566705	0.762727	23.5736	0	0	2.85836	16.3483	9.61731	21.1793	0	0	18.1078	6.39883	16.1443	0
bmo-mir-3220-3p	8.15563	8.15269	0.99964	12.9438	2.56947	2.60819	2.25473	-0.00584899	0.0826517	0.0571734	0.762727	20.8325	0	9.16108	11.4334	14.1685	12.8231	22.1878	0	0	14.9123	0	0.504509	0
tgu-mir-2976-3-5p	6.81273	11.4448	1.67991	6.62903	7.02704	3.83735	5.21943	0.00688283	0.0827183	0.0583746	0.762727	0	3.54051	30.5369	8.57508	0.544943	3.20577	0	0.716767	0	5.32582	0.799853	0	35.3198
miR-2285p-3p	5.77231	10.9304	1.8936	10.4915	0.266618	4.976	0.243388	-0.00489084	0.0825956	0.0580812	0.762727	17.5431	38.2375	0	2.14377	1.08989	14.426	0	0	0	0	1.59971	0	0
hsa-mir-638-5p	5.51243	9.81211	1.78	10.1802	0.0666544	4.33546	0.0608469	-0.00428716	0.0825454	0.0546203	0.762727	0	29.0322	3.05369	0	0.544943	14.426	24.2049	0	0	0	0.399927	0	0
miR-2285cd-5p	9.01808	10.681	1.1844	14.7072	2.38082	4.38037	1.20208	-0.00823117	0.0828952	0.061081	0.78745	16.9949	29.0322	3.05369	1.42918	16.3483	32.0577	4.03415	0.716767	0	7.98872	0	4.54058	1.03882
ptr-mir-1303-5p	17.4424	22.2188	1.27383	20.0087	14.4484	7.12935	10.3109	0.00411199	0.0824932	0.0621796	0.794455	0	57.3563	33.5906	15.0064	22.8876	11.2202	0	0	70.2373	5.8584	0	10.5947	0
miR-30a-3p	29.7597	40.0989	1.34742	16.027	45.7812	4.01415	21.8919	0.00809666	0.0828521	0.0627538	0.794696	4.38578	10.6215	27.4832	12.148	34.8763	17.6317	5.04269	74.5438	152.181	28.2268	0	17.6578	2.07763
mmu-mir-6236-5p	1805.66	1486.99	0.823518	1395.77	2283.85	244.045	804.129	0.0201568	0.0853565	0.0691338	0.795853	696.243	1601.02	1542.11	1249.82	513.336	2639.95	1527.93	712.467	6216.01	1529.57	3363.78	897.522	983.76
miR-1306-5p	1119.84	458.295	0.40925	944.147	1324.82	110.161	215.228	0.0376342	0.092992	0.0638467	0.795853	788.345	1320.61	851.98	1089.03	534.044	679.623	1345.39	959.751	2329.54	984.743	1501.72	722.962	1450.19
miR-155-5p	302.743	977.118	3.22755	538.479	27.7184	485.807	11.3572	-0.00251735	0.0824474	0.0640789	0.795853	1.09645	49.5672	15.2685	6.43131	10.3539	3686.64	0	50.8905	0	15.4449	0.399927	22.7029	76.8725
miR-7-2-5p	71.5399	52.6723	0.736265	68.3537	75.2572	7.77055	30.2555	-0.00615623	0.0825432	0.0723142	0.795853	61.9492	84.9723	73.2886	22.1523	70.2976	88.1587	77.6574	45.8731	0	102.788	217.56	83.2441	2.07763
miR-195	66.9672	26.1473	0.390449	73.7834	59.0149	4.25374	14.2367	-0.0168807	0.0841804	0.0712116	0.795853	54.2741	72.2265	64.1275	78.6049	81.7414	73.7327	91.7769	81.7115	11.7062	83.0827	50.3908	107.461	19.7375
ppy-mir-1268-3p	58.2282	46.0022	0.790033	78.6135	34.4453	19.3685	8.86033	-0.012759	0.0835231	0.0679863	0.795853	35.6345	6.37292	85.5034	89.3237	51.7695	104.188	177.503	9.31797	23.4124	61.7795	19.5964	66.5952	25.9704
miR-185-5p	18.052	14.2305	0.788305	26.9985	7.61442	4.96565	2.41766	-0.0118249	0.0833502	0.071038	0.795853	8.77157	34.697	36.6443	17.1502	10.8989	38.4692	42.3586	17.9192	0	11.7168	3.19941	4.54058	8.31054
miR-2285af-1-3p	16.1113	13.6954	0.850051	18.5839	13.2267	4.72031	5.9016	-0.00569149	0.0825871	0.0683732	0.795853	37.8274	21.2431	0	10.0043	33.2415	9.61731	18.1537	37.9887	0	19.1729	0	22.1984	0
miR-324-5p	15.8347	23.1882	1.46439	20.1114	10.8452	9.84669	7.38183	-0.00394287	0.0824831	0.0657328	0.795853	13.1573	0	21.3758	20.7231	1.63483	3.20577	80.683	0.716767	0	14.9123	0	49.4419	0
pxy-mir-193-3p	12.3975	40.3869	3.25767	1.28377	25.3635	0.806037	23.1536	0.00331525	0.082494	0.0728559	0.795853	0	0	0	5.71672	3.26966	0	0	0	152.181	0	0	0	0
miR-202-3p	11.9521	36.1845	3.02746	22.1967	0	17.745	0	-0.00222004	0.0824381	0.0727258	0.795853	0	17.7026	0	1.42918	0	136.245	0	0	0	0	0	0	0
miR-378b-3p	11.0316	12.0558	1.09284	17.3587	3.64994	4.68399	2.39926	-0.00537733	0.0825765	0.0708586	0.795853	14.802	0	42.7517	7.86049	18.528	22.4404	15.1281	2.86707	0	16.51	0	2.52255	0
miR-11985-3p	7.441	24.2424	3.25795	13.819	0	11.9719	0	-0.0024808	0.0824478	0.0682236	0.795853	0	0.708102	0	0	1.63483	91.3644	3.02561	0	0	0	0	0	0
miR-873-5p	7.09604	16.369	2.30678	9.50134	4.28986	8.06516	2.40513	0.000529623	0.0823968	0.0703112	0.795853	0	61.6049	0	0	4.90448	0	0	16.4856	0	0	3.19941	6.05411	0
gga-mir-6687-5p	5.18069	7.83266	1.51189	7.89184	2.01769	3.42055	1.76988	-0.00429543	0.0825161	0.0704325	0.795853	2.74111	20.535	3.05369	5.71672	0	0	23.1964	0	11.7062	0	0.399927	0	0
mmu-mir-5124a-5p	5.17193	7.21395	1.39483	9.30067	0.355054	2.90746	0.324119	-0.00451866	0.0825602	0.0681753	0.795853	5.48223	0	15.2685	7.1459	0	16.0288	21.1793	0	0	2.13033	0	0	0
hsa-mir-4516-5p	4.01892	4.62235	1.15015	6.82816	0.741481	1.75389	0.451446	-0.00932908	0.0831061	0.0677732	0.795853	10.4162	2.83241	9.16108	8.57508	1.08989	1.60288	14.1195	0	0	0.532582	0.799853	0	3.11645
miR-505	3.31691	5.07725	1.53072	6.15998	0	2.08262	0	-0.00398384	0.0825361	0.065353	0.795853	10.9645	0	15.2685	9.28967	5.99437	1.60288	0	0	0	0	0	0	0
mmu-mir-6240-5p	1601.34	1240.27	0.774522	1276.18	1980.69	211.647	670.802	0.0231701	0.0863387	0.0755122	0.803366	1122.76	1066.4	2366.61	1479.2	461.021	1554.8	882.47	1160.45	5478.51	1204.7	2306.38	640.222	1093.87
miR-191	549.996	344.558	0.626474	394.955	730.876	34.1938	176.502	0.0275979	0.0879513	0.0758154	0.803366	447.898	268.371	293.154	421.608	518.785	484.071	330.8	906.71	1545.22	387.187	297.545	846.567	402.022
miR-1260b-5p	257.132	132.445	0.515087	321.714	181.785	51.9656	30.0293	-0.0201793	0.0851279	0.0804517	0.803366	171.046	279.7	439.732	240.817	144.955	466.439	509.312	142.637	58.5311	190.132	303.144	212.398	183.871
miR-11971-3p	60.0324	44.5413	0.741954	78.5063	38.4795	19.9288	5.66188	-0.0129141	0.0834172	0.0821961	0.803366	49.3401	94.1776	79.396	50.0213	18.528	195.552	62.5293	41.5725	58.5311	39.411	41.5924	38.3427	11.427
miR-2419-5p	55.4911	56.3987	1.01635	81.0736	25.6449	23.07	12.1855	-0.00709132	0.0827067	0.0749101	0.803366	101.421	27.616	186.275	116.478	110.078	25.6462	0	23.6533	0	29.292	87.9839	1.51353	11.427
ami-mir-92b-5p	21.1557	35.8817	1.69608	9.08883	35.2338	4.20837	19.4802	0.00751755	0.0828374	0.0748152	0.803366	0.548223	17.7026	30.5369	0.71459	0	0	14.1195	25.8036	46.8249	3.72807	0	0	135.046
miR-181a-1-5p;miR-181a-2-5p	17.1889	19.7762	1.15052	23.3867	9.95824	8.66408	4.78257	-0.00374174	0.0824542	0.0784061	0.803366	24.67	46.7348	0	17.8647	8.71908	65.7183	0	27.9539	0	6.39098	24.3955	1.00902	0
miR-4286-2-3p	14.7291	18.2436	1.23861	21.3138	7.047	7.33615	5.35428	-0.00372207	0.0824674	0.0797918	0.803366	4.93401	0	42.7517	2.85836	16.3483	28.8519	53.4525	2.86707	0	36.2155	3.19941	0	0
miR-2284z-2-3p	13.7135	12.1173	0.883607	17.5652	9.2198	4.26698	4.6893	-0.00621135	0.0826151	0.0820318	0.803366	30.1523	33.2808	0	10.7188	25.0674	9.61731	14.1195	8.60121	0	13.3145	32.3941	1.00902	0
miR-2285bm-5p	8.47333	8.38944	0.9901	10.4125	6.21095	2.68128	3.74785	-0.00509052	0.0825454	0.0777757	0.803366	12.6091	1.4162	6.10738	6.43131	25.6123	9.61731	11.0939	0	0	12.2494	0.799853	24.2165	0
miR-25-5p	7.8854	15.562	1.97353	14.6443	0	7.07892	0	-0.00337883	0.0824917	0.0805495	0.803366	0	50.2753	0	1.42918	0	33.6606	17.1451	0	0	0	0	0	0
miR-328	6.78322	9.48361	1.3981	10.6682	2.25077	4.011	2.05466	-0.00439733	0.0825471	0.0825261	0.803366	6.03045	0	0	7.86049	13.0786	14.426	33.2817	0	0	0	0	0	13.5046
miR-98	6.43756	12.1528	1.8878	8.06444	4.53953	5.0742	4.144	-0.000856037	0.0823978	0.0810632	0.803366	0	0	9.16108	2.85836	4.35954	40.0721	0	27.2372	0	0	0	0	0
gga-mir-1692-5p	5.88111	15.7242	2.67368	2.18121	10.1977	2.01941	8.8299	0.00294654	0.082466	0.0764417	0.803366	0	0	15.2685	0	0	0	0	2.1503	58.5311	0	0	0.504509	0
hsa-mir-1237-5p	5.48282	11.4909	2.09581	9.84362	0.395209	5.39662	0.172031	-0.00491579	0.0825928	0.0815469	0.803366	0	6.37292	9.16108	10.0043	0	0	43.3671	0	0	0.532582	0.799853	0	1.03882
rno-mir-3547-5p	5.21821	14.3075	2.74183	1.81451	9.1892	1.22402	8.18539	0.00592444	0.0826833	0.0780215	0.803366	0	3.54051	9.16108	0	0	0	0	0.716767	0	0	0.399927	0	54.0185
miR-369-3p	141.923	100.27	0.706505	164.458	115.633	42.3894	31.1601	-0.0128809	0.0834498	0.0903685	0.819066	338.802	210.306	125.201	72.8881	302.988	65.7183	35.2988	98.9139	0	130.482	176.768	232.579	55.0573
hsv1-mir-H17-3p	68.43	69.7622	1.01947	75.9203	59.6913	33.3818	14.7329	0.0126872	0.0834317	0.0862367	0.819066	15.3502	284.657	48.8591	65.7422	13.0786	78.5414	25.2134	11.4683	128.768	63.3772	51.1906	35.8202	67.5231
miR-2285b	52.2772	66.1651	1.26566	28.7337	79.7446	9.90664	34.8393	0.0156017	0.0842137	0.0914651	0.819066	13.7056	4.24861	27.4832	5.71672	37.601	25.6462	86.7342	43.006	269.243	30.3572	53.5902	28.2525	54.0185
miR-140-5p	18.8976	22.852	1.20925	14.1446	24.4428	4.67311	12.2203	-0.0030344	0.0824358	0.0850904	0.819066	28.5076	0	0	22.8669	23.4325	0	24.2049	58.0581	0	15.4449	0	73.1539	0
ssc-mir-95-5p	18.4383	32.2174	1.74731	5.36117	33.6949	2.31122	17.1902	0.0072353	0.0828147	0.0895717	0.819066	4.93401	0	18.3222	7.86049	0	6.41154	0	0	117.062	23.9662	0	5.04509	56.0961
dre-mir-26a-3-5p	10.1297	11.9891	1.18356	4.72097	16.4399	1.968	5.85739	0.010141	0.0831098	0.0905523	0.819066	3.28934	4.95672	0	4.28754	16.8932	1.60288	2.01708	18.6359	46.8249	8.52131	3.19941	12.1082	9.34935
ppc-mir-84a-5p	8.75885	16.2691	1.85744	6.73064	11.1251	3.68442	8.68157	0.00476349	0.082546	0.0865873	0.819066	0	0	9.16108	29.2982	5.44943	3.20577	0	0	58.5311	0.532582	0	3.53157	4.15527
miR-431-5p	8.75037	9.24674	1.05673	14.7147	1.79192	3.11567	1.63579	-0.00399479	0.082494	0.0877601	0.819066	11.5127	28.3241	15.2685	15.0064	21.7977	0	11.0939	10.7515	0	0	0	0	0
hsa-mir-6846-5p	8.19476	18.484	2.25559	0.686951	16.9539	0.635993	9.95385	0.00260537	0.0824501	0.0915061	0.819066	0	0	0	0	0	4.80865	0	0	58.5311	0	43.1921	0	0
mmu-mir-7082-5p	8.12631	18.1453	2.2329	6.58172	9.92832	5.36148	8.87497	0.00407313	0.0825303	0.0866108	0.819066	0	41.0699	0	5.00213	0	0	0	0	58.5311	0	0	0	1.03882
miR-935-3p	7.3558	8.70339	1.1832	11.169	2.90707	3.57953	1.94627	-0.00520821	0.0825835	0.0896138	0.819066	24.1218	19.1188	3.05369	6.43131	3.26966	0	22.1878	12.9018	0	0	0	4.54058	0
miR-216a-5p	6.13154	13.6386	2.22434	0.623729	12.5573	0.43259	7.35771	0.00472347	0.0825845	0.0919224	0.819066	1.09645	0	0	0	3.26966	0	0	0	0	13.8471	0	10.5947	50.902
mmu-mir-6398-5p	3.86459	4.70932	1.21858	6.40862	0.896551	1.93448	0.433991	-0.00647326	0.0827158	0.0883031	0.819066	14.802	10.6215	3.05369	0.71459	0	9.61731	6.05123	0.716767	0	2.66291	1.99963	0	0
miR-2285dc-3p	2.09128	5.02625	2.40344	0.0778489	4.44027	0.0720741	2.72174	0.00395114	0.0825318	0.0921521	0.819066	0	0	0	0	0.544943	0	0	5.73414	0	0	1.19978	1.00902	18.6987
miR-11998-3p	13.0976	18.9127	1.44399	21.7727	2.97654	8.31688	1.8197	-0.00373465	0.0824726	0.0929288	0.820871	6.57867	64.4373	9.16108	2.85836	0	32.0577	37.3159	11.4683	0	6.39098	0	0	0
miR-100-3p	26.3176	24.8951	0.94595	23.8579	29.1872	4.89112	13.7366	-0.00306963	0.082412	0.095086	0.829684	41.6649	0	30.5369	27.869	20.1629	33.6606	13.111	33.6881	0	51.1278	0	90.3072	0
mdo-mir-12410-3p	8.66744	9.71966	1.1214	8.85185	8.4523	3.5421	4.12593	0.000854823	0.0823943	0.0945476	0.829684	0	24.0755	21.3758	10.0043	4.90448	1.60288	0	27.9539	0	10.6516	0	12.1082	0
miR-2904-3-5p	1015	1210.86	1.19297	795.853	1270.67	117.478	700.315	0.0197383	0.0852657	0.0956747	0.82976	512.04	805.821	1135.97	894.666	222.337	1170.11	830.027	301.759	5080.5	395.708	925.43	414.707	505.904
miR-9-2-5p	34.1657	24.6173	0.720527	26.0294	43.6581	3.24334	13.2902	0.0175211	0.0845288	0.0999446	0.833099	15.3502	19.8269	27.4832	27.869	40.8707	33.6606	17.1451	14.3353	0	48.9975	29.5946	80.7215	88.2995
hsa-mir-5100-3p	20.0579	21.024	1.04817	28.1154	10.6574	5.91258	9.20212	-0.00513202	0.0825268	0.0994967	0.833099	43.3096	53.8158	36.6443	19.2939	12.5337	8.01442	23.1964	1.43353	0	1.06516	0.399927	61.0456	0
hsa-mir-3195-5p	19.4455	24.5846	1.26428	19.3049	19.6095	8.90835	10.4991	-0.00214406	0.0823986	0.102645	0.833099	1.09645	17.7026	9.16108	7.1459	6.53931	75.3356	18.1537	0	0	12.2494	69.5872	35.8202	0
hsa-mir-6756-5p	14.3055	21.4136	1.49688	21.4456	5.97539	9.20769	5.35812	-0.0058072	0.0826574	0.100772	0.833099	7.67512	1.4162	48.8591	25.0106	0	1.60288	65.555	0	0	0.532582	0	0	35.3198
miR-146a	9.94163	11.2129	1.12787	8.13142	12.0535	2.87265	5.72623	-0.00571739	0.0825671	0.104396	0.833099	21.3807	0.708102	0	6.43131	10.3539	16.0288	2.01708	5.73414	0	12.782	41.1924	12.6127	0
let-7b-5p;let-7c-5p	8.30536	11.5617	1.39208	12.0606	3.92422	5.20131	2.34665	-0.00552647	0.0826068	0.0979438	0.833099	42.7614	12.7458	3.05369	9.28967	0.544943	16.0288	0	15.0521	0	7.98872	0	0.504509	0
hsa-mir-12121-3p	7.41781	8.85586	1.19387	11.8286	2.27186	3.61234	1.53724	-0.00455656	0.0825289	0.103721	0.833099	0	1.4162	15.2685	10.0043	7.6292	19.2346	29.2476	0	0	1.59774	0.399927	10.5947	1.03882
mmu-mir-7035-3p	7.11448	9.52158	1.33834	11.8815	1.553	3.94239	1.41768	-0.00369558	0.0824822	0.101199	0.833099	6.03045	16.9945	21.3758	1.42918	7.08425	0	30.2561	9.31797	0	0	0	0	0
miR-2299-5p	6.93923	19.4733	2.80626	0.981184	13.8903	0.591386	11.0229	0.00367186	0.0825088	0.102258	0.833099	0	0	3.05369	0	3.8146	0	0	0	0	0	0	9.58568	73.756
gga-mir-1580-5p	5.47856	15.5429	2.83704	0.38457	11.4215	0.280707	8.72917	0.00318607	0.0824828	0.103336	0.833099	0.548223	0	0	2.14377	0	0	0	0	58.5311	0	9.99817	0	0
miR-2374-3p	5.06578	8.27625	1.63376	7.64106	2.06128	3.77255	1.60289	-0.00373862	0.0824931	0.0989291	0.833099	1.64467	0	3.05369	2.14377	0	22.4404	24.2049	0	0	1.06516	10.798	0.504509	0
miR-11975-5p	4.22315	7.63855	1.80873	7.6716	0.199963	3.43142	0.182541	-0.00282078	0.0824579	0.104792	0.833099	0	0	0	12.148	0.544943	20.8375	20.1708	0	0	0	1.19978	0	0
miR-6536-1-5p	4.19551	6.5189	1.55378	7.71557	0.0887636	2.7266	0.0810297	-0.00314675	0.0824741	0.100373	0.833099	0	0	9.16108	12.8626	0	12.8231	19.1622	0	0	0.532582	0	0	0
rno-mir-296-3p	4.01205	9.74558	2.42908	7.45095	0	4.64084	0	-0.00235669	0.082448	0.0980851	0.833099	7.67512	0	0	0	8.17414	0	36.3074	0	0	0	0	0	0
miR-545-5p	3.77409	7.10426	1.88237	7.00903	0	3.18607	0	-0.00237571	0.0824485	0.10207	0.833099	15.3502	0	0	0	12.5337	0	21.1793	0	0	0	0	0	0
miR-455-3p	12.2559	28.6488	2.33755	14.8885	9.18449	13.5335	6.64593	-0.00134552	0.0824092	0.106167	0.839364	0	0	0	0	1.63483	102.585	0	45.1563	0	6.92356	0	3.02706	0
gga-mir-425-5p	2.40035	2.86974	1.19555	1.27998	3.70744	0.415353	1.4867	0.00656432	0.0826741	0.107129	0.842318	0.548223	2.12431	3.05369	2.14377	1.08989	0	0	2.1503	11.7062	2.66291	1.59971	1.00902	3.11645
ssc-mir-1285-3p	18851.7	27023.7	1.43349	14839.9	23532.1	8284.19	12787.5	0.010842	0.0832064	0.122076	0.84503	9219.46	4656.48	68079	6758.59	2310.01	2604.69	10250.8	7392.02	89950.6	6029.36	31637.4	4985.56	1197.76
mmu-mir-6240-3p	1648.02	1532.65	0.929993	1228.26	2137.75	255.807	827.619	0.0106123	0.0829875	0.12519	0.84503	440.771	1135.09	1896.34	1504.21	604.886	2377.08	639.413	670.177	2271.01	1711.72	6482.41	633.664	1057.52
miR-664b-3p	240.655	130.527	0.542384	270.243	206.135	28.9938	68.1128	-0.0129049	0.0833882	0.108736	0.84503	296.589	371.046	164.899	297.984	154.219	266.079	340.886	512.489	0	314.223	103.581	191.209	115.309
miR-6526-2-3p	126.645	69.9836	0.552598	144.939	105.301	29.9986	20.068	-0.0211447	0.0853989	0.124404	0.84503	279.594	55.9401	103.826	154.351	244.134	84.9529	91.7769	78.8444	11.7062	142.199	146.373	149.839	102.843
miR-664b	94.6986	51.1033	0.539642	112.675	73.7261	11.8752	24.7986	-0.0150757	0.0838161	0.112616	0.84503	137.056	102.675	109.933	175.789	72.4774	92.9673	97.8282	192.81	0	71.3659	29.1946	90.8117	58.1738
miR-12056-3p	67.0009	49.7949	0.743198	50.4097	86.3574	10.7742	24.9282	0.0154904	0.0839942	0.110879	0.84503	22.4771	90.6371	39.698	47.1629	13.6236	46.4837	92.7855	43.7228	70.2373	210.37	52.3904	30.2706	111.153
mmu-mir-5108-3p	41.3857	81.6985	1.97408	26.3136	58.9699	8.74503	47.0159	0.0102834	0.0831858	0.108223	0.84503	2.19289	15.5783	73.2886	23.5815	0	35.2635	34.2903	3.58384	316.068	11.7168	1.19978	1.51353	19.7375
miR-29b-1-5p	25.9768	28.7724	1.10762	35.9373	14.3563	12.4632	6.76209	-0.00423261	0.0824474	0.122948	0.84503	29.0558	113.296	12.2148	27.1544	8.17414	38.4692	23.1964	38.7054	0	11.7168	0.399927	35.3157	0
cfa-mir-7-3-3p;efu-mir-7c-3p;pal-mir-7b-2-3p	18.1201	15.1304	0.835008	16.1876	20.3746	4.5041	7.31321	-0.00286664	0.0824131	0.12095	0.84503	0	17.7026	3.05369	14.2918	14.1685	36.8664	27.2305	22.2198	0	14.9123	48.7911	36.3247	0
mmu-mir-8117-3p	16.1282	52.8133	3.27459	1.52297	33.1676	0.672026	30.2778	0.00335593	0.0824909	0.122985	0.84503	0	0	3.05369	3.57295	0	0	4.03415	0	199.006	0	0	0	0
miR-2285ac-3p	12.1756	15.7453	1.29318	6.29112	19.0408	2.62372	8.09732	0.00531854	0.0825681	0.122373	0.84503	0	0	3.05369	8.57508	17.9831	14.426	0	24.3701	58.5311	9.05389	0	1.51353	20.7763
miR-3432b-3p	12.1483	14.3029	1.17736	15.6551	8.05696	4.51855	6.39548	-0.00357444	0.0824512	0.115167	0.84503	19.736	0.708102	30.5369	19.2939	1.63483	6.41154	31.2647	0	0	0	42.7922	5.5496	0
ipu-mir-203c-3p;gga-mir-203b-3p;hsa-mir-203b-3p	11.732	12.439	1.06026	15.5936	7.22675	4.13973	5.125	-0.00318479	0.0824355	0.124891	0.84503	24.67	0	21.3758	12.8626	31.6067	17.6317	1.00854	0	0	9.05389	0	34.3066	0
miR-6534-3p	11.7114	10.5365	0.899678	11.1746	12.3377	3.4005	4.92232	-0.00289893	0.0824129	0.118225	0.84503	7.67512	0	9.16108	27.869	2.17977	19.2346	12.1025	26.5204	0	22.901	23.5957	1.00902	0
ipu-mir-203c-3p;hsa-mir-203b-3p;ggo-mir-203b-3p	9.30524	11.5321	1.23931	14.5983	3.12999	4.89806	1.88849	-0.00340186	0.0824501	0.111683	0.84503	9.86801	0	21.3758	11.4334	40.8707	17.6317	1.00854	0	0	11.7168	0	7.06313	0
efu-mir-9301-5p	8.57069	14.4304	1.68369	8.95454	8.12287	5.85878	5.33047	0.00170996	0.0824012	0.119281	0.84503	0	0.708102	45.8054	10.7188	5.44943	0	0	13.6186	35.1187	0	0	0	0
rno-mir-3544-3p	8.3732	25.458	3.04041	15.3298	0.257221	12.5279	0.161305	-0.00251494	0.0824448	0.113746	0.84503	0	0	9.16108	1.42918	0.544943	96.1731	0	0	0	0	0	0.504509	1.03882
miR-2285au-5p;miR-2285cd-5p	7.16172	8.54639	1.19334	12.0388	1.47184	3.4109	0.720848	-0.00456506	0.082519	0.121945	0.84503	0.548223	0.708102	27.4832	10.0043	12.5337	12.8231	20.1708	0	0	4.26065	0	3.53157	1.03882
miR-154c-3p	7.08145	8.80019	1.24271	8.64617	5.25594	4.03961	2.17323	-0.00460845	0.0825195	0.124675	0.84503	25.7665	0	0	23.5815	1.08989	0	10.0854	2.1503	0	4.79323	13.9974	10.5947	0
cel-mir-2-5p	7.00538	8.59048	1.22627	11.188	2.12565	3.41315	1.84986	-0.00472891	0.0825444	0.113165	0.84503	15.8985	10.6215	6.10738	0	8.17414	30.4548	7.05976	0	0	12.2494	0	0.504509	0
tca-mir-3827-3p	6.97501	7.76587	1.11338	10.1386	3.28418	3.32589	1.58295	-0.00215428	0.0824166	0.109567	0.84503	0	0	3.05369	22.1523	21.2528	14.426	10.0854	5.01737	0	10.6516	0	4.03608	0
mdo-mir-203-3p	5.55157	12.267	2.20964	1.56578	10.2016	0.994405	6.80446	0.00402604	0.0825175	0.114763	0.84503	0	0	0	7.1459	3.8146	0	0	0	0	6.39098	0	8.07215	46.7468
miR-7-3-3p;miR-7-2-5p	4.73698	7.96313	1.68105	8.36482	0.504509	3.54879	0.460552	-0.00343693	0.0824936	0.124453	0.84503	20.2842	0	12.2148	2.85836	0	0	23.1964	0	0	0	0	3.02706	0
eca-mir-9084-3p	4.13647	9.27776	2.24292	7.47271	0.244182	4.40141	0.161311	-0.00304242	0.0824717	0.110707	0.84503	0	0	0	10.0043	0	8.01442	34.2903	0	0	1.06516	0.399927	0	0
hsa-mir-6775-5p	3.92041	9.46692	2.41478	2.53878	5.53232	2.10899	5.05029	-0.00085879	0.082392	0.111112	0.84503	0	0	0	0	1.63483	0	16.1366	0	0	0	33.1939	0	0
miR-411a	3.67225	8.18477	2.22882	6.8199	0	3.83488	0	-0.00217513	0.0824408	0.124132	0.84503	24.1218	0	0	21.4377	2.17977	0	0	0	0	0	0	0	0
gga-mir-6654-3p	3.47227	6.68496	1.92524	6.2392	0.244182	3.07691	0.161311	-0.00331106	0.0824806	0.117239	0.84503	0	0	3.05369	10.0043	0	6.41154	24.2049	0	0	1.06516	0.399927	0	0
miR-2285cd-5p;miR-2285cb-5p;miR-2285e-2-5p	2.79259	6.57594	2.35478	5.11416	0.0840849	3.1305	0.0767587	-0.00325251	0.0824792	0.116353	0.84503	0.548223	1.4162	0	0.71459	0	24.0433	9.07684	0	0	0	0	0.504509	0
gga-mir-6593-5p	2.59831	3.96941	1.52769	2.68109	2.50172	1.27779	1.86132	0.000886735	0.082397	0.119789	0.84503	0	6.37292	9.16108	2.14377	1.08989	0	0	0	0	1.59774	0.799853	12.6127	0
eca-mir-9017-5p	2.441	6.35072	2.60169	4.45719	0.0887636	3.072	0.0810297	-0.00347344	0.0824962	0.119551	0.84503	0	0.708102	3.05369	2.14377	1.08989	0	24.2049	0	0	0.532582	0	0	0
miR-342-3p	6066.21	2183.74	0.359984	5038.74	7264.93	361.741	1048.41	0.0345724	0.0901978	0.12722	0.849744	6652.68	5230.75	4711.85	5337.27	3797.16	3798.84	5742.61	10827.5	10430.2	4897.62	4444.78	5466.36	7523.11
miR-101	49.412	41.7905	0.845755	56.6721	40.9419	10.9419	21.1067	-0.00493418	0.0824814	0.12667	0.849744	31.7969	79.3075	45.8054	23.5815	91.5504	28.8519	95.8111	30.821	0	64.4424	0.399927	144.794	5.19409
miR-136-3p	4.25754	4.51196	1.05976	6.75706	1.34144	1.66921	0.962782	-0.00411327	0.0825096	0.127669	0.849744	10.9645	0	9.16108	10.0043	7.08425	0	10.0854	6.4509	0	1.59774	0	0	0
mmu-mir-1983-3p	106.78	66.1545	0.619539	95.3868	120.072	16.5057	33.9833	0.0138206	0.0834998	0.128776	0.853139	14.2538	119.669	149.631	67.1714	73.0223	105.79	138.17	150.521	292.656	51.6604	67.5876	84.2531	73.756
miR-4449-5p	3.26529	6.85834	2.10038	5.89271	0.199963	3.21215	0.182541	-0.00332168	0.0824806	0.12986	0.856355	0.548223	0.708102	12.2148	3.57295	0	0	24.2049	0	0	0	1.19978	0	0
cpi-mir-99b-5p	4.92387	2.54556	0.516984	5.92564	3.75514	0.667373	1.14497	-0.0077049	0.0827289	0.132483	0.868906	8.77157	4.24861	6.10738	5.00213	7.08425	3.20577	7.05976	5.01737	0	4.26065	7.19868	6.05411	0
miR-2442-5p	4.76206	11.1573	2.34295	3.28304	6.48759	2.7231	5.82564	-0.000412593	0.0823936	0.132977	0.868906	0	0	0	2.14377	0	20.8375	0	0	0	0.532582	38.393	0	0
miR-2284y	15.4222	17.8037	1.15442	23.596	5.88608	7.22986	3.89464	-0.00403076	0.0824762	0.134197	0.87289	32.8934	57.3563	3.05369	39.3024	17.4382	0	15.1281	0	0	9.58647	0	25.73	0
miR-1584-5p	43.709	50.6437	1.15866	56.3946	28.9092	24.1972	7.83824	-0.00924602	0.0829337	0.137223	0.886165	12.6091	39.6537	51.9128	25.0106	2.72471	56.101	206.75	27.9539	0	15.4449	53.1902	52.9735	23.8928
eca-mir-9097-3p	27.0207	24.5183	0.907389	21.203	33.8079	5.53709	12.6922	0.012948	0.0835265	0.137509	0.886165	10.4162	13.4539	42.7517	40.7316	2.72471	27.249	11.0939	19.3527	46.8249	4.26065	36.3933	2.52255	93.4935
miR-221	25.6179	53.2576	2.07892	34.5149	15.2382	25.9765	8.51154	-0.00282503	0.0824356	0.138096	0.886165	0.548223	0.708102	3.05369	0	1.63483	200.361	35.2988	58.0581	23.4124	9.05389	0.399927	0.504509	0
miR-483-3p	29.6659	31.5497	1.0635	21.6639	39.0016	5.54671	17.0467	0.00987127	0.0830165	0.138914	0.887436	4.93401	19.8269	18.3222	27.869	7.6292	52.8952	20.1708	15.7689	128.768	22.3684	0	31.7841	35.3198
ssc-mir-1285-5p	12062.2	15562	1.29015	9954.28	14521.3	4963.35	7214.57	0.0115372	0.0832709	0.142554	0.892156	6939.95	4259.94	41887.5	4719.15	2590.66	2668.8	6613.99	3159.51	50734.8	4661.15	22713.4	3265.19	2593.93
miR-425-3p	40.1783	25.0472	0.623401	45.721	33.7119	7.94398	11.3009	-0.00400308	0.0824037	0.140399	0.892156	40.0203	82.1399	54.9665	54.3088	44.6853	36.8664	7.05976	79.5612	0	37.2807	47.5913	37.8382	0
miR-200b-3p;miR-200c-3p	12.0762	6.42485	0.532028	14.7017	9.013	2.43262	1.9868	-0.0166285	0.0842145	0.141301	0.892156	28.5076	11.3296	6.10738	12.8626	12.5337	14.426	17.1451	10.0347	0	14.9123	7.19868	13.6218	8.31054
miR-2299-3p	6.79396	8.52	1.25406	8.40376	4.91586	3.13071	3.43231	-0.00345535	0.0824721	0.14277	0.892156	16.9949	0	0	9.28967	10.3539	0	22.1878	22.9365	0	0	0	6.55862	0
hsa-mir-2861-3p	2.95125	3.76487	1.27569	3.8576	1.89384	1.7224	0.857009	0.00175486	0.0823976	0.142554	0.892156	0	9.20533	12.2148	2.85836	2.72471	0	0	0	0	5.8584	0.399927	3.02706	2.07763
miR-217	6.32305	7.62628	1.20611	5.62043	7.14277	2.02224	3.90232	-0.00413145	0.0824897	0.145004	0.898607	4.93401	0.708102	0	3.57295	8.17414	4.80865	17.1451	20.0695	0	1.59774	0	21.1894	0
sbo-mir-151-3p	1.33924	3.03218	2.2641	0.203242	2.66457	0.121462	1.66022	0.0036102	0.0824897	0.145058	0.898607	0	0.708102	0	0.71459	0	0	0	1.43353	11.7062	0	0.799853	1.00902	1.03882
miR-28-3p	273.495	150.367	0.549798	227.739	326.877	24.4344	80.4372	0.0202243	0.0849412	0.148955	0.899886	200.101	296.695	198.49	317.992	110.623	256.462	213.81	116.833	667.255	174.687	515.905	249.732	236.85
pma-mir-204-5p	137.611	82.1751	0.597156	92.8808	189.796	14.0698	36.416	0.0190686	0.0848492	0.146827	0.899886	150.761	78.5994	73.2886	32.8711	105.174	75.3356	134.136	282.406	280.949	160.84	17.5968	188.182	208.802
let-7i	63.2001	115.669	1.83021	80.1876	43.3814	57.4091	14.9637	-0.00562199	0.0825687	0.148589	0.899886	27.4111	16.2864	21.3758	12.148	10.8989	452.014	21.1793	2.1503	11.7062	43.1391	106.78	73.6584	22.854
ptr-mir-1234-5p	5.74788	7.10902	1.23681	1.82185	10.3282	0.926526	3.25388	0.00420625	0.0825019	0.147287	0.899886	0	0	6.10738	0	0	1.60288	5.04269	15.0521	23.4124	6.39098	13.9974	0	3.11645
hsa-mir-320d-1-3p	3.19769	5.79162	1.81119	5.49335	0.519409	2.6651	0.474153	-0.00276455	0.0824553	0.148051	0.899886	9.86801	0	3.05369	20.7231	0	4.80865	0	0	0	0	0	0	3.11645
miR-2285bp-3p	3.05531	6.14889	2.01253	5.57175	0.119461	2.83939	0.109053	-0.00256595	0.0824459	0.149038	0.899886	0.548223	0	6.10738	0	21.2528	0	11.0939	0.716767	0	0	0	0	0
mml-mir-1232-5p	3.07453	6.17607	2.00879	2.71953	3.48869	2.40934	2.41245	0.00309238	0.0824477	0.149735	0.900299	0	0	18.3222	0.71459	0	0	0	0	0	1.59774	1.19978	1.51353	16.6211
ggo-mir-574-3p;hsa-mir-574-3p;efu-mir-574-1-3p	49.4577	131.892	2.66676	81.3032	12.3046	65.4896	4.10043	-0.00322225	0.082465	0.151591	0.903861	0	0	6.10738	19.2939	6.53931	504.909	32.2732	14.3353	0	23.9662	0	10.5947	24.9316
eca-mir-8970-5p	39.9744	41.9787	1.05014	30.4176	51.124	7.33404	22.9056	0.0111158	0.0831513	0.151308	0.903861	7.1269	32.5727	45.8054	20.7231	2.72471	46.4837	57.4866	22.9365	175.593	14.3797	37.5931	30.2706	25.9704
miR-2887-2-5p	469.49	545.283	1.16144	364.236	592.287	73.9519	308.641	0.0158862	0.0840774	0.157313	0.911187	200.65	245.003	311.477	438.758	97.5447	692.446	563.773	160.556	2271.01	251.379	441.919	199.281	229.579
let-7b-5p	352.089	198.775	0.564558	422.534	269.904	87.9913	40.4846	-0.0152188	0.0837058	0.154487	0.911187	260.406	286.073	506.913	338.715	82.8313	713.284	769.514	253.736	199.006	352.569	440.719	142.776	230.617
miR-15a	63.406	33.9484	0.535413	68.1816	57.8345	3.62027	19.7163	-0.0136747	0.0833363	0.164853	0.911187	76.7512	70.1021	58.0201	57.8818	74.1122	57.7039	82.7001	43.7228	0	60.7143	57.5894	155.893	29.0869
miR-10b-5p	31.9042	26.355	0.826066	36.7517	26.2487	12.2112	6.16126	-0.00883892	0.0827881	0.165153	0.911187	40.0203	14.8702	27.4832	12.8626	49.5898	107.393	5.04269	20.0695	11.7062	43.1391	49.9908	22.1984	10.3882
miR-32-3p	23.2116	20.9083	0.900767	18.4462	28.7713	4.88032	10.7646	0.00856406	0.0828023	0.156685	0.911187	1.64467	34.697	12.2148	5.71672	21.2528	38.4692	15.1281	13.6186	0	30.3572	61.1888	2.01804	65.4455
tgu-mir-2974-5p	19.1416	42.7169	2.23163	10.8374	28.8299	3.9683	24.6667	0.00748996	0.0827744	0.160722	0.911187	0.548223	9.91343	6.10738	7.86049	1.63483	33.6606	16.1366	0.716767	163.887	2.13033	1.19978	5.04509	0
miR-2285bu-1-3p	16.0418	25.8491	1.61136	7.05684	26.5242	3.32901	13.8633	-0.00207888	0.0823982	0.158411	0.911187	4.38578	0	3.05369	2.14377	14.1685	25.6462	0	27.9539	0	13.8471	99.1818	18.1623	0
miR-2285cm-3p	10.956	11.3313	1.03426	16.1316	4.91774	4.79066	1.96034	-0.00510488	0.082513	0.156117	0.911187	10.9645	0	42.7517	21.4377	19.073	9.61731	9.07684	12.9018	0	9.58647	0.399927	4.54058	2.07763
miR-9-5p	10.843	12.6731	1.16878	9.34887	12.5861	3.31772	6.48648	-0.00321694	0.0824359	0.159802	0.911187	24.1218	0	0	13.5772	13.6236	0	14.1195	0	0	7.45614	27.195	40.8653	0
bdo-mir-100-5p	9.58051	11.1346	1.16221	5.61185	14.2106	0.993601	6.06553	0.0100756	0.0830097	0.155375	0.911187	6.03045	10.6215	3.05369	5.71672	7.6292	3.20577	3.02561	6.4509	46.8249	8.52131	13.1976	4.03608	6.2329
rlcv-mir-rL1-13-3p	9.02891	28.9032	3.20119	16.3876	0.443818	14.3093	0.405149	-0.00126466	0.0824074	0.160221	0.911187	0	0	0	5.71672	0	108.996	0	0	0	2.66291	0	0	0
miR-2285be-5p	8.14036	11.0178	1.35348	6.17205	10.4367	3.90752	4.62836	0.00429828	0.0824899	0.162603	0.911187	1.09645	0.708102	30.5369	2.14377	8.71908	0	0	15.0521	0	17.0426	0.399927	0	30.1257
miR-423-5p;miR-11971-3p	6.95776	13.2815	1.90888	9.6404	3.82802	6.07486	3.23072	-0.00189557	0.0824211	0.158737	0.911187	0	0	0	0	0	43.2779	24.2049	21.503	0	1.06516	0.399927	0	0
miR-3431-3p	5.99749	9.26619	1.54501	9.92087	1.42022	4.09639	1.29648	-0.00371409	0.0824957	0.16351	0.911187	32.8934	0	15.2685	12.148	2.72471	6.41154	0	0	0	8.52131	0	0	0
miR-499	5.83383	7.34363	1.2588	8.35617	2.89111	3.04848	2.03588	-0.00261593	0.0824295	0.15433	0.911187	14.2538	0	0	22.1523	9.26402	12.8231	0	13.6186	0	3.72807	0	0	0
miR-410	4.6667	6.17475	1.32315	7.4494	1.42022	2.54633	1.29648	-0.00385573	0.0825029	0.165673	0.911187	20.8325	0	0	11.4334	5.99437	4.80865	9.07684	0	0	8.52131	0	0	0
miR-2285j-1-3p;miR-2285cy-3p;miR-2285j-2-3p	2.72175	5.49293	2.01816	5.05468	0	2.51402	0	-0.00202026	0.082434	0.163857	0.911187	15.3502	0	0	0	4.90448	0	15.1281	0	0	0	0	0	0
miR-11976-2-3p	2.64361	5.6128	2.12316	1.23487	4.28713	0.439275	3.20586	0.00733296	0.0827711	0.165683	0.911187	0.548223	0	3.05369	0.71459	2.72471	1.60288	0	1.43353	0	1.06516	0.399927	1.00902	21.8152
dno-mir-2483-3p	2.08286	6.18633	2.97011	0.102084	4.39377	0.0945116	3.48638	0.00255852	0.082451	0.164996	0.911187	0	0	0	0.71459	0	0	0	2.1503	23.4124	0	0.799853	0	0
cbr-mir-7586-3p	1.85841	2.66219	1.43251	3.37526	0.0887636	1.07857	0.0810297	-0.00349409	0.0824954	0.166191	0.911187	6.57867	0	6.10738	0.71459	3.8146	6.41154	0	0	0	0.532582	0	0	0
miR-2285m-4-3p	1.55807	2.61888	1.68085	2.74515	0.173136	1.16837	0.158051	-0.00232949	0.082437	0.16128	0.911187	9.31979	0	3.05369	3.57295	3.26966	0	0	0	0	0	0	0	1.03882
mmu-mir-5100-3p	612.072	357.751	0.584492	516.548	723.516	83.9744	181.038	0.0151171	0.0835999	0.167824	0.913333	253.279	457.434	964.967	458.052	294.814	533.761	653.532	362.684	971.617	251.911	644.282	1574.57	536.03
miR-2904-3-3p	368.154	268.069	0.728145	306.193	440.442	57.2498	140.966	0.0133468	0.0831236	0.179341	0.913333	278.497	240.047	531.342	182.22	128.606	538.569	244.066	240.834	1147.21	205.576	574.695	136.722	337.616
miR-2284aa	360.649	105.252	0.29184	315.325	413.528	35.2457	38.0006	0.0229863	0.0849955	0.177381	0.913333	189.137	296.695	461.107	210.089	294.269	333.4	422.577	465.899	573.605	407.425	421.523	322.886	289.83
miR-148b-3p	142.443	65.9399	0.46292	171.815	108.177	21.8467	23.6023	-0.0153678	0.0837242	0.174447	0.913333	226.964	163.572	180.168	134.343	235.415	206.772	55.4696	156.255	0	78.8221	105.981	176.074	131.93
miR-11995	65.8899	33.7036	0.511514	78.3656	51.3348	11.3892	12.9642	-0.013614	0.0833488	0.174495	0.913333	75.6548	138.08	51.9128	72.1736	57.7639	48.0865	104.888	54.4743	0	79.8872	98.382	36.8292	38.4362
mml-mir-448-3p	35.4359	35.9102	1.01338	48.5346	20.154	15.2019	8.87877	-0.00263842	0.0823893	0.177271	0.913333	43.8578	58.0644	131.309	37.8733	61.5785	0	7.05976	56.6246	0	33.0201	0	31.2796	0
ppc-mir-2272-5p	34.2463	27.2277	0.795055	49.1922	16.8094	10.5489	4.70496	-0.00973008	0.0828916	0.169546	0.913333	11.5127	24.7836	76.3423	80.7486	16.8932	70.5269	63.5379	16.4856	0	6.92356	15.5971	33.8021	28.0481
miR-107-3p	32.457	25.213	0.776812	34.6162	29.9379	10.485	8.82931	-0.00839285	0.0827549	0.174126	0.913333	7.67512	8.49723	12.2148	47.1629	24.5224	54.4981	87.7428	39.4222	0	41.5414	65.9879	19.1714	13.5046
miR-2285bc-3p	29.2197	15.939	0.545489	35.4051	22.0033	5.39219	6.00389	-0.0123195	0.0831911	0.180401	0.913333	53.1776	59.4806	36.6443	17.8647	27.7921	25.6462	27.2305	39.4222	0	37.2807	9.99817	30.7751	14.5434
miR-12027-3p	19.2763	62.0813	3.22059	1.92014	39.5253	1.31192	35.5317	0.00188324	0.082425	0.176682	0.913333	9.86801	0	0	3.57295	0	0	0	0	234.124	0	0	3.02706	0
miR-24-2-3p	9.3724	10.5603	1.12675	13.8983	4.09222	4.21091	2.73982	-0.00438619	0.0824851	0.172107	0.913333	20.2842	37.5294	3.05369	7.1459	15.8033	6.41154	7.05976	0	0	6.39098	0	18.1623	0
miR-10b	9.06062	22.94	2.53183	14.24	3.01796	11.2132	2.75501	-0.00149979	0.0824037	0.177758	0.913333	7.67512	0	0	0	5.44943	86.5558	0	0	0	18.1078	0	0	0
miR-154c	7.43786	9.74096	1.30964	10.3537	4.03608	3.54527	3.68442	-0.00290627	0.0824414	0.17057	0.913333	16.9949	0	9.16108	5.00213	13.0786	0	28.2391	0	0	0	0	24.2165	0
miR-103-2-5p	6.67007	19.1862	2.87646	0.71459	13.6181	0.661581	10.8347	0.00212657	0.0824142	0.174135	0.913333	0	0	0	5.00213	0	0	0	0	0	3.72807	72.7867	0	5.19409
efu-mir-9350-5p	6.41706	11.0346	1.71958	5.35021	7.66172	3.51296	5.16654	0.00162799	0.0823976	0.178254	0.913333	0.548223	27.616	0	5.71672	0.544943	0	3.02561	1.43353	0	6.39098	35.5935	1.51353	1.03882
miR-412-5p	4.98199	9.89827	1.98681	7.265	2.31847	4.6498	1.93809	-0.00212536	0.0824195	0.172596	0.913333	6.03045	0	3.05369	0	4.90448	36.8664	0	12.9018	0	0	0	1.00902	0
tgu-mir-2989-2-3p	4.56612	13.9767	3.06095	8.11957	0.420425	6.91449	0.383793	-0.00150644	0.0824118	0.173113	0.913333	0	0.708102	0	2.14377	1.08989	52.8952	0	0	0	0	0	2.52255	0
eca-mir-8978-5p	4.52318	7.49797	1.65768	7.87162	0.616666	3.35827	0.476795	-0.00270565	0.0824421	0.175846	0.913333	0	0	15.2685	5.00213	0	9.61731	25.2134	0	0	3.19549	0	0.504509	0
hsa-mir-4641-5p	3.82391	8.67697	2.26914	7.10154	0	4.0804	0	-0.00293631	0.0824643	0.179807	0.913333	0.548223	0	15.2685	0.71459	2.72471	30.4548	0	0	0	0	0	0	0
hbv-mir-B4-3p	3.49791	6.47188	1.85021	6.28683	0.244182	2.94717	0.161311	-0.00289947	0.0824533	0.176112	0.913333	0	0.708102	15.2685	7.86049	0	0	20.1708	0	0	1.06516	0.399927	0	0
cja-mir-150-3p	2.92177	7.19884	2.46386	5.42615	0	3.43624	0	-0.00204541	0.0824353	0.173022	0.913333	0	0	0	2.14377	0	9.61731	26.222	0	0	0	0	0	0
sko-mir-4834-3p	1.91958	5.77498	3.00847	0	4.15908	0	3.23895	0.00234903	0.082447	0.180624	0.913333	0	0	0	0	0	0	0	0	0	2.13033	0	1.00902	21.8152
miR-217-5p	251.649	120.588	0.479192	291.872	204.721	36.1027	52.8714	-0.0162158	0.0839434	0.182022	0.915881	380.467	160.031	222.92	177.218	323.151	371.869	407.449	141.92	0	209.837	190.765	433.374	252.433
miR-26a-2-3p	6.86431	10.6792	1.55575	11.7669	1.14457	4.71766	0.873669	-0.0034526	0.0824714	0.182408	0.915881	10.9645	36.1132	0	0	20.1629	0	15.1281	0	0	5.8584	0	1.00902	0
miR-7-3-3p;miR-7-1-5p;miR-7-2-5p	1122.78	461.34	0.410892	1103.66	1145.09	80.43	260.572	-0.0179124	0.0837868	0.186681	0.921651	1346.44	1161.29	946.644	673.143	1257.18	1248.65	1092.25	780.559	491.661	1486.97	1285.36	2308.64	517.331
miR-2483-3p	268.191	73.5053	0.274078	229.295	313.57	26.8273	18.2786	0.0241179	0.0854255	0.186778	0.921651	236.832	337.057	192.383	280.119	102.449	185.935	270.288	275.955	351.187	389.317	270.35	320.363	274.248
miR-98-5p	66.9349	56.6718	0.846671	54.2899	81.6873	14.9364	28.0848	0.0137245	0.083559	0.184824	0.921651	19.736	113.296	39.698	30.0128	29.4269	28.8519	119.007	20.7862	199.006	88.9411	6.39883	36.8292	138.163
miR-2285j-1-3p;miR-2285bp-3p;miR-2285j-2-3p	7.69434	10.4655	1.36015	6.46639	9.12696	3.34702	4.86498	-0.00454952	0.0825294	0.186295	0.921651	10.9645	0	0	0	3.26966	4.80865	26.222	32.2545	0	5.8584	0	16.6488	0
cja-mir-339-5p	6.18744	19.9767	3.22859	10.9664	0.611988	9.93413	0.403527	-0.00124586	0.0824064	0.185759	0.921651	0	0	0	1.42918	0	75.3356	0	0	0	2.66291	0	1.00902	0
miR-2285bu-1-5p	45.055	34.4406	0.764413	62.6521	24.5249	13.8274	6.13485	-0.00844538	0.082738	0.18765	0.922775	64.6903	133.123	67.1812	39.3024	65.9381	67.3212	1.00854	26.5204	0	12.2494	43.592	39.8562	24.9316
miR-2285f	6.29036	5.87916	0.93463	8.29386	3.95294	2.02356	2.28409	-0.00363445	0.0824562	0.189201	0.927215	16.4467	0	12.2148	10.7188	2.17977	6.41154	10.0854	11.4683	0	12.2494	0	0	0
miR-151-3p	1874.38	379.354	0.202389	1802.01	1958.8	162.561	117.439	0.0319976	0.0868405	0.201456	0.927511	1633.7	2006.05	2238.36	2474.62	1723.11	1332	1206.21	1459.34	2446.6	1884.27	1992.03	1962.54	2008.03
miR-128-1-3p	534.744	147.482	0.275798	583.354	478.033	42.9847	65.9097	-0.0189863	0.0837108	0.207838	0.927511	525.198	683.319	653.49	755.321	587.993	461.631	416.526	741.137	280.949	609.806	481.912	450.022	304.373
miR-16a	395.936	143.093	0.361404	341.263	459.72	36.1272	66.0163	0.0271081	0.0865352	0.198506	0.927511	447.35	304.484	326.745	324.424	494.263	177.92	313.655	303.909	772.611	332.331	453.517	352.652	543.301
miR-216b-5p	202.016	81.7215	0.40453	233.772	164.967	16.9145	39.9672	-0.0151266	0.0835582	0.212602	0.927511	265.34	249.252	152.685	212.233	213.073	237.227	306.595	265.204	0	281.203	91.5832	152.362	199.453
miR-26a-2-5p	124.485	55.5282	0.446062	95.6136	158.169	13.4408	22.7237	0.0185125	0.0842812	0.208938	0.927511	106.903	55.232	94.6644	72.8881	158.033	54.4981	127.076	206.429	175.593	150.721	40.3926	199.281	176.599
miR-7857-1-5p;miR-7857-2-5p	98.6626	30.9254	0.313446	103.907	92.5439	12.4434	11.0914	-0.0184644	0.0839164	0.210691	0.927511	114.03	102.675	79.396	105.759	50.6797	107.393	167.417	81.7115	105.356	93.7344	89.9835	137.731	46.7468
miR-484-5p	95.618	65.9346	0.689563	94.739	96.6436	25.0623	26.7324	0.0190835	0.0843954	0.207309	0.927511	70.7208	252.084	64.1275	106.474	55.5841	57.7039	56.4781	70.2432	58.5311	55.9211	89.5836	64.5772	241.006
miR-149-5p	55.6666	46.5511	0.836249	48.0359	64.569	8.24548	25.7965	0.0126559	0.0833021	0.212245	0.927511	20.8325	72.9346	33.5906	38.5878	34.3314	86.5558	49.4183	5.73414	0	56.4536	56.3897	77.6945	191.142
miR-139	40.9229	80.9796	1.97883	22.9196	61.9268	6.62749	46.6017	0.00711775	0.0827156	0.211851	0.927511	8.77157	29.7403	9.16108	18.5793	45.7752	0	48.4098	32.2545	316.068	9.58647	0	12.6127	1.03882
let-7a-3p	34.3297	88.3894	2.57472	13.3357	58.8228	2.57875	51.2495	0.00675257	0.0827045	0.19475	0.927511	18.0914	0	18.3222	22.1523	9.26402	14.426	11.0939	5.01737	339.481	6.39098	0	1.00902	1.03882
miR-211-5p	33.2041	15.8387	0.47701	40.7572	24.3921	5.82304	4.51696	-0.0154108	0.083637	0.19283	0.927511	47.6954	70.1021	45.8054	42.1608	21.7977	22.4404	35.2988	20.0695	46.8249	23.9662	11.5979	26.2345	17.6599
mmu-mir-5112-5p	25.6419	40.029	1.56108	10.945	42.7883	3.17312	21.7695	0.00818494	0.0828329	0.199553	0.927511	17.5431	4.24861	27.4832	9.28967	0.544943	6.41154	11.0939	2.86707	117.062	17.5752	0.799853	0	118.425
miR-3956-3p	22.4213	28.2747	1.26106	29.8592	13.7438	12.9115	6.20314	-0.00376305	0.082428	0.210703	0.927511	38.3756	107.632	15.2685	17.8647	1.63483	0	28.2391	23.6533	0	3.19549	41.9923	13.6218	0
oni-mir-10827-3p	20.705	24.373	1.17716	12.3698	30.4294	3.76534	12.8821	0.00787803	0.0827842	0.193648	0.927511	15.3502	21.9512	30.5369	4.28754	2.17977	3.20577	9.07684	22.2198	93.6498	0	39.1928	0.504509	27.0092
miR-363-3p	20.4606	26.5826	1.29921	29.8691	9.48402	12.008	4.64971	-0.00283646	0.0823785	0.211875	0.927511	12.6091	101.259	12.2148	45.7337	2.72471	22.4404	12.1025	30.1042	0	2.66291	19.5964	4.54058	0
miR-212-5p	18.2156	12.3909	0.680236	20.6606	15.3632	3.47445	6.04101	-0.00514454	0.0824803	0.205081	0.927511	26.3147	16.9945	21.3758	18.5793	35.9662	3.20577	22.1878	34.4048	0	31.9549	0	22.7029	3.11645
miR-429-3p	15.1087	27.4821	1.81896	7.86982	23.554	3.94765	15.1475	-0.00147123	0.0823907	0.212313	0.927511	0	0	6.10738	0	31.0617	4.80865	13.111	24.3701	0	8.52131	3.99927	104.433	0
oan-mir-1408-3p	13.6547	13.4031	0.981578	21.5708	4.41926	4.89532	2.41938	-0.00752035	0.0827441	0.197117	0.927511	14.802	36.1132	33.5906	9.28967	2.17977	36.8664	18.1537	0	0	0.532582	0.399927	13.1172	12.4658
dre-mir-16b-5p	13.525	14.9435	1.10488	6.40454	21.8322	1.38888	7.52683	0.00749515	0.0826989	0.192805	0.927511	13.1573	5.66482	9.16108	7.86049	4.35954	1.60288	3.02561	6.4509	35.1187	31.9549	50.7907	2.52255	4.15527
miR-421-3p	11.9875	16.2109	1.35232	17.9694	5.00857	7.28382	2.75852	-0.00150186	0.0823928	0.202083	0.927511	0	0	45.8054	13.5772	2.17977	48.0865	16.1366	0	0	15.4449	13.5975	1.00902	0
miR-7857-1-5p	10.1431	7.11494	0.701459	13.0064	6.80244	2.6329	2.32179	-0.00677658	0.0825757	0.192674	0.927511	8.77157	5.66482	24.4295	12.8626	4.35954	20.8375	14.1195	9.31797	0	17.5752	6.79875	5.04509	2.07763
mmu-mir-216c-5p	8.87023	18.9781	2.13952	1.56213	17.3963	0.940457	10.3129	0.00379424	0.0825046	0.199686	0.927511	6.03045	0	0	0	4.90448	0	0	25.0869	70.2373	9.05389	0	0	0
miR-383-5p	8.28458	12.3109	1.486	13.1175	2.64616	5.4421	2.13952	-0.00163163	0.0823981	0.193333	0.927511	0	0	42.7517	20.7231	2.17977	8.01442	18.1537	14.3353	0	0.532582	0	1.00902	0
miR-410-3p	6.98474	10.2917	1.47346	9.98333	3.48638	4.8699	1.47675	-0.00362686	0.0824682	0.202285	0.927511	35.6345	0	21.3758	1.42918	11.4438	0	0	7.88444	0	7.98872	0	5.04509	0
pbv-mir-449a-5p	6.39482	6.75234	1.05591	7.98712	4.53715	2.88425	2.01828	-0.00623434	0.0826288	0.204427	0.927511	22.4771	0.708102	6.10738	2.14377	10.3539	0	14.1195	11.4683	0	11.1842	0	3.53157	1.03882
miR-382	6.31812	9.52098	1.50693	9.09066	3.08349	4.4005	1.77168	-0.00415822	0.0824986	0.202036	0.927511	14.2538	0	0	6.43131	1.63483	35.2635	6.05123	0	0	5.8584	0	11.6037	1.03882
miR-12063-5p	6.10084	6.59819	1.08152	6.43493	5.71107	2.80475	2.22868	-0.00363679	0.082421	0.202763	0.927511	2.19289	0.708102	3.05369	5.71672	4.35954	4.80865	24.2049	13.6186	11.7062	6.92356	0	2.01804	0
efu-mir-9341-5p	5.43037	8.72163	1.60608	6.76658	3.87147	3.3715	3.3533	-0.00299077	0.0824505	0.213891	0.927511	23.0254	0	0	0.71459	5.99437	17.6317	0	22.2198	0	0	0	1.00902	0
miR-29c-3p;miR-29a-3p	4.27093	7.85412	1.83897	2.30166	6.5684	1.43072	4.22564	0.000608234	0.082392	0.209086	0.927511	0	0	6.10738	10.0043	0	0	0	0	0	10.1191	0	28.2525	1.03882
miR-8548-5p	4.19277	10.1588	2.42294	2.61745	6.03064	2.42329	5.3131	0.00190322	0.0824217	0.212388	0.927511	0	0	18.3222	0	0	0	0	0	35.1187	1.06516	0	0	0
oan-mir-1382-5p	3.78233	7.36128	1.94623	6.91007	0.133309	3.36714	0.121694	-0.00214382	0.0824301	0.204575	0.927511	0	0	18.3222	7.86049	0	0	22.1878	0	0	0	0.799853	0	0
miR-29b-1-3p;miR-29b-2-3p	3.78163	6.20204	1.64004	6.18612	0.9764	2.79855	0.891327	-0.00299036	0.0824547	0.209624	0.927511	9.31979	0	3.05369	1.42918	0	22.4404	7.05976	0	0	5.8584	0	0	0
hsa-mir-10400-3p	3.15184	5.91687	1.87728	1.74497	4.79318	1.61553	2.87333	0.00158679	0.0824069	0.200712	0.927511	0	0	12.2148	0	0	0	0	0	0	0	0	11.0992	17.6599
pal-mir-9995-3p	3.1138	5.96301	1.91503	5.47816	0.355381	2.76781	0.240655	-0.00190367	0.0824159	0.213514	0.927511	0	0.708102	0	11.4334	4.35954	20.8375	1.00854	0	0	0.532582	1.59971	0	0
miR-1185-3p	2.9905	6.50292	2.17453	5.55378	0	3.03077	0	-0.00202876	0.0824342	0.213046	0.927511	4.38578	0	0	12.148	22.3426	0	0	0	0	0	0	0	0
gga-mir-6578-5p	2.64871	4.40683	1.66376	2.05122	3.34579	1.59299	1.8462	0.000542658	0.0823932	0.196875	0.927511	0	0	12.2148	2.14377	0	0	0	11.4683	0	0	0	7.56764	1.03882
gga-mir-12215-5p	2.30395	3.99512	1.73403	4.27876	0	1.73996	0	-0.00321811	0.0824838	0.190993	0.927511	4.38578	14.162	6.10738	4.28754	0	0	1.00854	0	0	0	0	0	0
gga-mir-1763-3p	1.99519	4.35109	2.18079	3.59108	0.133309	2.05513	0.121694	-0.0024406	0.0824384	0.210153	0.927511	0	0.708102	0	0.71459	1.63483	16.0288	6.05123	0	0	0	0.799853	0	0
miR-128	1693.74	696.234	0.411064	2015.54	1318.31	293.882	117.745	-0.0167429	0.0835026	0.218801	0.932606	1941.26	2595.2	2678.09	3075.59	1829.37	1317.57	671.686	1876.5	1030.15	1089.13	1388.15	1406.07	1119.84
hsa-mir-3196-5p	73.9869	67.7761	0.916056	57.1138	93.6721	15.1436	35.0245	0.0113869	0.0831197	0.21957	0.932606	7.67512	32.5727	45.8054	51.4505	29.4269	105.79	127.076	32.9713	0	52.193	139.974	77.1899	259.704
hsa-mir-7977-5p	22.647	40.7909	1.80116	35.2369	7.95872	19.4874	4.14497	-0.00586221	0.0825948	0.219096	0.932606	2.74111	7.78913	15.2685	13.5772	9.26402	158.686	39.333	5.01737	0	1.06516	0	13.6218	28.0481
miR-2431-3p	15.2958	18.3262	1.19812	13.0477	17.9186	3.82701	9.9607	-0.00259058	0.0823891	0.219249	0.932606	30.7005	0	24.4295	10.7188	4.35954	8.01442	13.111	47.3066	0	3.19549	0	57.0096	0
miR-2285at-4-3p	8.62353	15.6358	1.81316	7.42506	10.0217	3.63712	8.34704	-0.00101638	0.0823936	0.219634	0.932606	2.74111	0	0	18.5793	25.6123	0	5.04269	0	0	0	55.5898	4.54058	0
hsa-mir-4301-5p	4.25498	10.8625	2.5529	0.59194	8.52852	0.405577	6.06071	0.000971942	0.0823973	0.217628	0.932606	0	0	3.05369	0	1.08989	0	0	0	0	7.45614	41.1924	2.52255	0
oni-mir-10955-3p	3.31424	8.46437	2.55394	1.75858	5.12918	1.46686	4.68228	-0.000278403	0.0823921	0.219035	0.932606	0	0	0	0	1.08989	11.2202	0	0	0	0	0	30.7751	0
oan-mir-1363-5p	2.1673	2.92413	1.34921	3.9489	0.0887636	1.13191	0.0810297	-0.00323624	0.0824653	0.22028	0.932606	0	5.66482	6.10738	0.71459	1.08989	8.01442	6.05123	0	0	0.532582	0	0	0
hsa-mir-6883-5p	2.34557	5.71514	2.43657	4.35606	0	2.72297	0	-0.00201188	0.0824334	0.221755	0.936082	0	0	6.10738	0	0	3.20577	21.1793	0	0	0	0	0	0
miR-12058-5p	24.6278	41.6414	1.69083	6.86642	45.3495	2.784	21.9708	0.00465697	0.0825406	0.222411	0.936088	17.5431	0	6.10738	6.43131	17.9831	0	0	0	105.356	0	0	34.8112	131.93
miR-105b	4.7198	13.965	2.95882	8.30885	0.532582	6.89782	0.486178	-0.00184597	0.082417	0.223752	0.936228	3.83756	0	0	1.42918	0	52.8952	0	0	0	3.19549	0	0	0
miR-29d-5p	2.01509	4.26953	2.11878	3.4455	0.346272	2.03212	0.316102	-0.00220685	0.0824308	0.223292	0.936228	7.1269	0	15.2685	0.71459	0	0	1.00854	0	0	0	0	0	2.07763
oan-mir-1346-3p	2.40741	4.84531	2.01266	4.47091	0	2.216	0	-0.00202272	0.082434	0.227334	0.948439	4.93401	0	15.2685	0	0	0	11.0939	0	0	0	0	0	0
miR-9-1-3p	171.772	85.4486	0.497453	205.534	132.384	28.7935	32.0622	-0.0140953	0.0834069	0.22897	0.950898	291.655	320.062	137.416	132.914	253.943	182.729	120.016	167.007	0	252.444	126.377	81.226	167.25
dre-mir-722-3p	4.46337	12.1454	2.72113	8.00082	0.33634	5.93236	0.307035	-0.00183392	0.0824233	0.229252	0.950898	0	10.6215	0	0	0	0	45.3842	0	0	0	0	2.01804	0
tgu-mir-2978-5p	3.53963	6.30453	1.78113	6.21324	0.420425	2.86782	0.383793	-0.00225162	0.0824356	0.230796	0.951928	14.2538	0	0	10.0043	0	19.2346	0	0	0	0	0	2.52255	0
miR-196b-5p	2.68406	7.13954	2.65998	0.818958	4.86001	0.389846	4.09079	0.00110214	0.0823987	0.230831	0.951928	0.548223	1.4162	3.05369	0.71459	0	0	0	0.716767	0	0	1.19978	27.2435	0
eca-mir-8992-3p	17.0147	18.4	1.08142	23.8388	9.05315	7.51672	5.07288	-0.0061253	0.0826127	0.232832	0.951951	26.8629	29.7403	12.2148	22.8669	3.8146	4.80865	66.5635	0	35.1187	10.1191	0	9.08117	0
miR-129-1-3p	11.1557	14.3428	1.28569	6.49351	16.5949	2.4777	7.5348	-0.00409951	0.082435	0.231864	0.951951	10.9645	0	6.10738	2.85836	0.544943	4.80865	20.1708	51.6072	0	3.19549	25.5953	19.1714	0
gga-mir-1582-3p	2.43855	5.73266	2.35085	1.61498	3.39938	1.19748	3.10319	0.000356329	0.0823962	0.232276	0.951951	0	0	9.16108	2.14377	0	0	0	0	0	0	20.3963	0	0
xtr-mir-145-3p	5.90577	9.53066	1.61379	9.78063	1.38509	4.27513	1.26441	-0.00418432	0.0825305	0.233512	0.952012	0	0.708102	24.4295	15.0064	1.08989	0	27.2305	0	0	0	0	0	8.31054
miR-200b	182.978	72.4903	0.396169	217.091	143.18	23.0499	26.1566	-0.0164638	0.0836248	0.235354	0.956794	161.726	122.502	207.651	216.521	323.696	267.682	219.861	126.868	11.7062	165.633	179.967	161.948	212.958
miR-204-5p	14471.7	3996.67	0.276172	12648.5	16598.8	969.841	1757.12	0.0240496	0.0842076	0.291093	0.95857	16476.8	12963.9	12440.7	14563.3	11672.1	7491.88	12930.5	23219.7	21890.6	14177.3	12234.6	14827.5	13242.8
miR-99a-5p	3261.91	735.322	0.225427	3310.09	3205.7	240.589	339.836	-0.0293639	0.0848818	0.266655	0.95857	4785.99	3049.09	2904.06	3055.59	3505.62	2792.23	3078.06	3239.07	2493.43	4979.64	3083.03	2804.57	2634.44
miR-1246-5p	2404.92	1387.6	0.576984	2417.86	2389.83	549.865	532.63	0.00975704	0.0826571	0.278277	0.95857	706.111	4433.43	4336.24	1340.57	803.79	2287.32	3017.54	397.806	4132.3	1964.16	3947.28	2274.83	1622.63
bmo-mir-6497-5p	926.996	812.124	0.876082	722.901	1165.11	209.875	400.832	0.0084311	0.0826014	0.25168	0.95857	316.873	854.68	592.416	742.459	237.05	1977.96	338.869	360.534	1486.69	816.98	3208.21	599.862	518.37
miR-139-5p	763.576	175.422	0.229738	818.588	699.395	19.9748	96.4073	-0.0211533	0.0833695	0.291729	0.95857	757.644	859.636	900.839	766.755	802.7	774.193	868.351	1204.89	632.136	560.276	501.108	722.458	575.505
miR-9-2-3p;miR-9-1-3p	718.526	234.338	0.326138	719.843	716.99	83.9476	101.18	-0.0183702	0.0834216	0.281693	0.95857	1152.91	479.385	714.564	514.505	881.172	751.753	544.61	819.265	1053.56	734.43	785.056	681.088	228.54
miR-23b-3p	513.91	156.709	0.304934	539.753	483.76	46.8176	74.8549	-0.0182958	0.083222	0.291741	0.95857	633.197	507.709	464.161	456.623	653.386	721.298	341.894	533.275	362.893	373.872	388.329	872.297	371.897
miR-2285au-5p	472.674	122.334	0.258813	540.485	393.56	35.6167	41.7171	-0.0208338	0.0835201	0.274477	0.95857	446.253	676.946	598.524	577.388	518.24	589.862	376.185	473.783	234.124	486.78	271.15	472.725	422.799
miR-449a	430.039	219.45	0.510304	481.951	369.474	65.1479	102.364	-0.0111307	0.0829389	0.241469	0.95857	553.157	227.301	439.732	553.092	702.431	248.447	649.498	463.032	0	309.43	239.956	829.414	375.013
miR-11987-5p	295.756	299.009	1.011	354.276	227.483	111.003	118.624	-0.00322961	0.0823684	0.252467	0.95857	46.0507	218.096	332.852	651.706	97.5447	916.85	216.836	44.4396	0	211.435	859.842	127.641	121.542
miR-2284z	221.253	63.3923	0.286515	186.415	261.897	15.2943	24.9291	0.0222766	0.0838494	0.290266	0.95857	202.842	159.323	229.027	132.199	149.859	179.523	252.134	356.95	222.418	198.653	336.338	230.561	226.462
miR-658-3p	160.18	114.163	0.712713	216.35	94.6489	49.1028	9.76896	-0.00856684	0.0826067	0.261336	0.95857	46.0507	291.738	345.067	368.728	33.7864	142.657	286.425	110.382	81.9436	91.0715	139.574	70.1268	74.7948
pal-mir-9993a-3p	108.504	156.931	1.44631	144.684	66.2939	76.6245	18.7135	-0.00609009	0.0825068	0.291698	0.95857	47.6954	39.6537	42.7517	114.334	64.8482	637.948	65.555	4.3006	70.2373	8.52131	125.177	107.461	82.0665
miR-99b	95.7953	147.235	1.53698	109.643	79.6396	72.1903	25.5755	-0.0041437	0.0824376	0.251443	0.95857	41.6649	0.708102	51.9128	45.7337	41.9606	575.436	10.0854	141.92	70.2373	57.5188	180.767	4.54058	22.854
miR-2285b-2-3p;miR-2285b-1-3p	91.3236	56.2328	0.615753	119.055	58.97	19.5996	17.1761	-0.00773952	0.0826246	0.2832	0.95857	127.736	74.3508	210.705	55.738	88.2807	174.714	101.862	94.6133	0	74.5614	0.399927	92.8297	91.4159
miR-2285bf-3-3p	70.2459	27.2904	0.388498	81.4429	57.1827	11.3698	6.33788	-0.019225	0.084306	0.236485	0.95857	137.056	77.8913	94.6644	41.4462	95.9099	46.4837	76.6489	72.3935	58.5311	36.2155	62.7885	37.3337	75.8336
miR-486-5p	65.8761	62.9853	0.956118	57.6086	75.5215	10.6385	35.3516	0.0103964	0.0828565	0.27961	0.95857	45.5025	121.794	45.8054	60.0255	28.882	60.9096	40.3415	17.9192	257.537	20.7707	102.381	18.1623	36.3586
miR-2285b-2-3p	65.5655	37.2108	0.567537	55.0255	77.862	5.19821	20.4066	0.012467	0.0830923	0.278888	0.95857	47.1472	41.778	61.0738	58.5964	39.7808	83.35	53.4525	5.01737	152.181	116.635	35.5935	58.0186	99.7264
miR-2285bs-5p;miR-2284z-4-5p;miR-2284z-3-5p	44.3234	45.0166	1.01564	30.2877	60.6984	5.38657	24.684	0.0108743	0.0830385	0.285508	0.95857	55.9187	44.6105	27.4832	12.8626	16.8932	32.0577	22.1878	48.7402	117.062	6.39098	1.59971	25.2255	165.172
ptr-mir-200c-5p	31.5231	36.4197	1.15533	33.3729	29.3649	8.41408	19.5236	-0.00390168	0.0823968	0.26616	0.95857	23.5736	46.0267	36.6443	10.0043	5.44943	35.2635	76.6489	2.1503	0	29.8246	133.975	5.04509	5.19409
miR-103-2-3p	31.1226	32.3287	1.03875	13.8415	51.2839	3.2216	15.4101	0.00727042	0.0826922	0.24487	0.95857	16.9949	0	12.2148	3.57295	24.5224	22.4404	17.1451	74.5438	0	85.2131	0	90.8117	57.1349
miR-224-5p	29.913	26.6222	0.889985	33.1392	26.1492	4.27516	15.0556	-0.00147027	0.0823427	0.255395	0.95857	20.2842	35.4051	48.8591	39.3024	38.146	36.8664	13.111	0.716767	0	63.3772	90.7834	2.01804	0
eca-mir-27b-3p	27.986	86.6749	3.09708	4.40948	55.4919	2.2986	49.7141	0.00259049	0.0824465	0.246707	0.95857	0	0	0	5.00213	8.71908	0	17.1451	2.1503	327.774	0	0	3.02706	0
miR-532-5p	25.0307	29.9205	1.19535	13.2299	38.7983	7.17689	13.9464	-0.00266555	0.082395	0.265923	0.95857	12.6091	0	0	13.5772	8.71908	57.7039	0	76.6941	0	19.7055	86.3842	47.9284	2.07763
miR-26b	24.8883	29.7088	1.19369	25.978	23.617	10.9843	12.4095	-0.00116929	0.0823767	0.239456	0.95857	9.31979	55.9401	9.16108	5.00213	19.073	83.35	0	84.5785	0	21.3033	0	35.8202	0
miR-7857-3p	23.4757	21.3052	0.90754	26.7651	19.6381	5.90262	10.5798	-0.00233153	0.0823615	0.288587	0.95857	27.9594	26.9079	58.0201	31.4419	21.2528	1.60288	20.1708	0	0	33.0201	71.1869	13.6218	0
miR-339b-5p	23.2164	20.3938	0.878423	31.9869	12.9841	8.51614	4.36668	-0.00558756	0.0825278	0.283013	0.95857	42.2132	0	67.1812	46.4483	9.26402	14.426	44.3757	19.3527	0	30.3572	0	12.6127	15.5823
miR-2346-5p	21.3445	51.8239	2.42797	8.95173	35.8028	3.2427	29.8467	0.00562211	0.0825932	0.247084	0.95857	10.9645	0	27.4832	0.71459	5.99437	6.41154	11.0939	0	199.006	12.2494	0	2.52255	1.03882
ptr-mir-3132-5p	18.3897	43.5284	2.36699	5.6551	33.2468	3.7196	24.4346	0.00193009	0.0824196	0.270059	0.95857	0	0	27.4832	0	0	0	12.1025	0	163.887	0	35.5935	0	0
miR-196b-5p;miR-196a-1-5p	17.4676	19.5684	1.12027	11.3312	24.6267	4.69862	9.61063	0.00249675	0.082398	0.271546	0.95857	0	0	6.10738	26.4398	14.7135	32.0577	0	0	58.5311	33.0201	0	48.9374	7.27172
mdo-mir-7311-5p	15.6032	21.4268	1.37323	9.72172	22.4648	3.18938	11.7205	0.00410584	0.0824586	0.291751	0.95857	3.28934	0.708102	24.4295	12.8626	0	9.61731	17.1451	0	81.9436	4.79323	30.3944	17.6578	0
miR-23a-3p;miR-23b-3p;miR-10174-3p	15.3798	18.393	1.19592	21.0268	8.79168	8.54641	3.05183	-0.00393163	0.0823996	0.262656	0.95857	20.8325	72.9346	0	13.5772	21.7977	16.0288	2.01708	6.4509	0	10.6516	21.996	12.6127	1.03882
hsa-mir-3648-1-5p_hsa-mir-3648-2_stem-loop	15.2971	18.9227	1.23701	11.7812	19.399	4.41685	9.8763	0.00636174	0.0825901	0.262156	0.95857	0	28.3241	6.10738	15.0064	2.17977	1.60288	29.2476	7.16767	0	0.532582	20.3963	17.6578	70.6396
miR-371-5p	13.767	18.1948	1.32163	8.54252	19.8621	4.86905	8.70507	0.00306569	0.0824049	0.271767	0.95857	5.48223	1.4162	39.698	5.00213	0.544943	1.60288	6.05123	1.43353	11.7062	3.19549	54.79	43.8923	4.15527
miR-449b-5p	13.5214	13.5066	0.998908	16.2976	10.2825	5.71147	4.26957	-0.00715585	0.0826092	0.274685	0.95857	9.31979	2.12431	18.3222	7.86049	19.6179	6.41154	50.4269	8.60121	0	6.39098	5.59897	32.7931	8.31054
hsa-mir-3178-5p	13.4101	14.6189	1.09014	10.9497	16.2805	3.2239	7.77665	0.00504451	0.0824857	0.280731	0.95857	0	24.0755	6.10738	10.0043	1.08989	19.2346	16.1366	0	0	4.79323	35.9934	8.07215	48.8244
cgr-mir-1973-3p;hsa-mir-1973-3p	12.578	10.4117	0.827772	15.5867	9.06771	2.56365	5.13673	-0.0027857	0.0823815	0.252052	0.95857	15.8985	14.162	27.4832	11.4334	15.2584	20.8375	4.03415	0.716767	0	27.6942	25.9952	0	0
miR-218-1-5p;miR-218-2-5p	11.8279	15.5453	1.31429	11.3348	12.4031	4.99282	7.29606	-0.0021742	0.0823934	0.263989	0.95857	36.1827	0	6.10738	7.1459	26.7022	3.20577	0	0	0	43.1391	0	31.2796	0
prv-mir-LLT5-3p	11.2397	21.1111	1.87825	9.3902	13.3975	2.69954	12.2302	-0.000983895	0.0823806	0.273309	0.95857	7.67512	0	15.2685	17.1502	3.26966	3.20577	19.1622	0	0	0	80.3853	0	0
miR-133a-2-3p;miR-133a-1-3p	11.2352	17.1769	1.52885	11.3825	11.0633	4.35683	8.98323	-0.00213459	0.0823926	0.26543	0.95857	31.7969	7.08102	0	25.7252	0	8.01442	7.05976	0	0	6.39098	59.989	0	0
tgu-mir-2976-1-3p	10.9818	11.4631	1.04384	15.3673	5.86529	4.85849	2.68693	-0.0029448	0.0824106	0.29176	0.95857	4.38578	0	24.4295	17.8647	0	33.6606	27.2305	0	0	15.4449	1.99963	14.6308	3.11645
miR-135a-2-5p;miR-135a-1-5p	10.9284	13.4429	1.23009	11.4038	10.3737	4.20408	6.41129	-0.00361027	0.0824265	0.282052	0.95857	33.4416	0	9.16108	4.28754	20.7078	11.2202	1.00854	0.716767	0	18.1078	0	42.3788	1.03882
hsa-mir-6848-5p	10.3665	13.8388	1.33496	5.70175	15.8087	2.10799	7.34453	0.00350092	0.0824383	0.28832	0.95857	2.74111	0	9.16108	17.1502	0	4.80865	6.05123	0	46.8249	11.7168	33.1939	0	3.11645
miR-376c-3p	9.77685	11.5431	1.18066	12.4492	6.65907	3.71268	5.13277	-0.00164471	0.08239	0.251808	0.95857	7.1269	12.7458	27.4832	0	19.6179	0	20.1708	34.4048	0	0	0	5.5496	0
eca-mir-9000-3p	8.93366	13.4594	1.5066	13.1475	4.01749	6.14416	2.56003	-0.00201354	0.0824018	0.259452	0.95857	0	22.6593	12.2148	7.1459	0	1.60288	48.4098	0	0	7.45614	0	16.6488	0
miR-2285bf-3-3p;miR-2285bf-2-3p;miR-2284f-3p	8.59827	17.0689	1.98516	5.64387	12.0451	2.69331	9.57384	0.00675013	0.0826395	0.292059	0.95857	2.19289	1.4162	18.3222	0.71459	15.2584	1.60288	0	2.86707	0	1.06516	0.399927	3.53157	64.4067
ame-mir-6050-5p	8.06576	11.1353	1.38057	13.682	1.51353	4.6617	1.38166	-0.00196719	0.0824066	0.248408	0.95857	0	20.535	30.5369	6.43131	0	8.01442	30.2561	0	0	0	0	9.08117	0
efu-mir-9277-5p	8.04959	7.16049	0.889548	8.87205	7.09005	2.61449	2.98767	-0.00351605	0.0824045	0.262952	0.95857	15.8985	9.20533	3.05369	21.4377	5.44943	0	7.05976	11.4683	0	19.1729	0.799853	11.0992	0
miR-27b-5p	7.60582	8.21425	1.07999	10.5818	4.1338	3.30371	2.40383	-0.00121097	0.0823926	0.25427	0.95857	0	8.49723	9.16108	10.7188	17.4382	27.249	1.00854	13.6186	0	11.1842	0	0	0
miR-2285bz	7.23143	11.3608	1.57103	11.4397	2.32176	5.23361	1.36562	-0.0024268	0.0824247	0.255261	0.95857	24.1218	20.535	0	0	35.4213	0	0	0	0	5.8584	0	8.07215	0
miR-7180-3p	7.17958	8.78325	1.22337	10.9826	2.74276	3.8052	1.43411	-0.00414714	0.0824867	0.272348	0.95857	24.67	25.4917	3.05369	13.5772	0	0	10.0854	0	0	4.79323	0	9.58568	2.07763
gga-mir-12253-5p	7.15184	14.9307	2.08767	3.48139	11.434	1.94081	8.34852	0.00444166	0.0825119	0.286023	0.95857	2.19289	15.5783	0	3.57295	0	0	3.02561	0	0	0	0.399927	12.1082	56.0961
let-7a-3-5p	6.92987	7.74528	1.11767	7.94193	5.74914	3.42443	2.29563	-0.00266608	0.0823867	0.29123	0.95857	3.83756	4.24861	0	10.0043	9.26402	0	28.2391	10.0347	11.7062	12.2494	0	0.504509	0
miR-148b-5p	6.2973	6.74849	1.07165	4.95357	7.86499	1.77748	3.37413	-0.00217491	0.0824005	0.27914	0.95857	10.4162	0	0	4.28754	10.3539	9.61731	0	20.7862	0	12.782	0	13.6218	0
miR-652-3p	6.19042	17.4501	2.81889	9.89875	1.86404	8.62573	1.70162	-0.000766386	0.0823981	0.28975	0.95857	0	0	0	3.57295	0	65.7183	0	0	0	11.1842	0	0	0
miR-874-3p	5.67308	9.31305	1.64162	4.19452	7.39806	2.47511	4.69689	-0.00217977	0.0824158	0.257552	0.95857	0.548223	0	0	1.42918	1.08989	19.2346	7.05976	12.185	0	0	31.1943	1.00902	0
eca-mir-9146-3p	5.31354	11.7204	2.20577	9.79193	0.0887636	5.49838	0.0810297	-0.00275788	0.0824435	0.258008	0.95857	0	43.9024	6.10738	6.43131	0	0	12.1025	0	0	0.532582	0	0	0
miR-6520-5p	5.26587	10.9156	2.07289	6.58399	3.72807	4.75016	3.40325	0.000321531	0.0823943	0.272192	0.95857	0	0	36.6443	1.42918	0	8.01442	0	0	0	22.3684	0	0	0
miR-2881-5p	5.16588	7.17038	1.38803	4.381	6.08157	1.45643	3.92678	0.00396464	0.0824524	0.286209	0.95857	0	12.0377	3.05369	5.00213	6.53931	0	4.03415	0	0	10.1191	0.399927	0	25.9704
miR-187-3p	5.09902	6.88638	1.35053	5.31769	4.84391	2.60508	2.8049	-0.00241131	0.0824217	0.288324	0.95857	4.38578	0	0	2.85836	9.80897	0	20.1708	13.6186	0	15.4449	0	0	0
gga-mir-12233-5p	4.83894	11.0915	2.29213	8.98661	0	5.22623	0	-0.00215885	0.0824361	0.260958	0.95857	0	39.6537	6.10738	0	0	0	17.1451	0	0	0	0	0	0
miR-2285ce-3p;miR-2285bn-3p;miR-2285da-3p	4.68224	10.3792	2.21672	1.22277	8.71828	1.05038	5.68842	0.00242715	0.0824344	0.256302	0.95857	0	0	0	0	0.544943	8.01442	0	0	0	14.9123	0	0	37.3974
miR-147-5p	4.68104	7.0079	1.49708	1.95163	7.86536	0.909854	3.67003	0.00310875	0.0824404	0.290809	0.95857	0	0	0	2.85836	5.99437	4.80865	0	19.3527	0	0	0	7.06313	20.7763
rno-mir-504-3p	4.56462	5.45096	1.19417	5.26686	3.74535	1.73711	2.53272	-0.0033502	0.0824411	0.247073	0.95857	12.6091	0	6.10738	6.43131	1.63483	0	10.0854	17.2024	0	4.26065	0	1.00902	0
miR-432-5p	3.88649	4.53081	1.16579	4.40738	3.27878	1.4648	2.09242	-0.00287783	0.0824305	0.285582	0.95857	8.77157	0	3.05369	3.57295	4.35954	0	11.0939	13.6186	0	0	0	6.05411	0
miR-7862-5p	3.49954	8.22262	2.34963	6.13878	0.420425	3.95898	0.383793	-0.00149473	0.0824118	0.272768	0.95857	0	0	0	0	0	28.8519	14.1195	0	0	0	0	2.52255	0
oha-mir-191-5p	3.49772	7.07877	2.02382	0.861025	6.57387	0.7166	3.80356	0.00222494	0.0824282	0.258421	0.95857	5.48223	0	0	0	0.544943	0	0	0	0	0	0	18.6668	20.7763
ppy-mir-1207-5p	3.35321	6.01146	1.79275	1.83323	5.12652	0.984294	3.27989	0.00169785	0.0823945	0.260805	0.95857	0	0	6.10738	5.71672	0	0	1.00854	0	0	2.13033	22.3959	0	6.2329
miR-1842-3p	3.06485	6.06501	1.97889	5.69186	0	2.76098	0	-0.00196808	0.0824309	0.244492	0.95857	0	16.2864	0	0	0	6.41154	17.1451	0	0	0	0	0	0
bmo-mir-277-5p	2.95485	6.00577	2.03252	3.47097	2.35271	2.77106	1.5688	0.00144341	0.0823998	0.267664	0.95857	0	21.2431	3.05369	0	0	0	0	0	0	3.72807	0	0	10.3882
mmu-mir-6931-5p	2.93443	5.56805	1.89749	5.30126	0.173136	2.54423	0.158051	-0.00291461	0.0824643	0.264029	0.95857	0	1.4162	15.2685	4.28754	0	0	16.1366	0	0	0	0	0	1.03882
miR-2285x-3p	2.93252	4.76332	1.62431	4.51389	1.0876	2.18681	0.79419	-0.00317294	0.0824553	0.262815	0.95857	10.4162	0	3.05369	0	1.08989	16.0288	1.00854	0	0	5.32582	1.19978	0	0
miR-10172-3p	2.91564	5.41526	1.85732	1.76701	4.25571	0.994082	2.94766	0.000419669	0.0823946	0.256973	0.95857	0	0	6.10738	5.71672	0.544943	0	0	0	0	5.8584	0	19.6759	0
isc-mir-100-5p	2.31099	1.88878	0.817305	1.62175	3.11511	0.366737	0.951348	0.00403584	0.082431	0.282887	0.95857	0.548223	2.12431	3.05369	1.42918	2.17977	0	2.01708	1.43353	0	6.92356	5.19905	2.01804	3.11645
cpo-mir-3613-3p	2.11697	2.8108	1.32775	3.34346	0.68607	1.19172	0.534981	-0.00265731	0.0824335	0.250942	0.95857	2.74111	0	0	7.86049	8.17414	1.60288	3.02561	3.58384	0	0.532582	0	0	0
hsa-mir-1268b-5p	1.94885	4.39139	2.25332	0.973641	3.0866	0.797518	2.38692	0.00050907	0.0823975	0.253987	0.95857	0	0.708102	6.10738	0	0	0	0	0	0	0	15.9971	2.52255	0
mmu-mir-92b-5p	1.89596	3.28801	1.73422	1.35407	2.52816	0.778181	1.71931	0.00169926	0.0824066	0.255358	0.95857	0	0.708102	3.05369	5.71672	0	0	0	0	11.7062	2.66291	0.799853	0	0
hsa-mir-5196-5p	1.82325	4.24892	2.33041	3.27176	0.133309	2.03208	0.121694	-0.0023117	0.0824373	0.252994	0.95857	0	1.4162	0	2.14377	0	3.20577	16.1366	0	0	0	0.799853	0	0
miR-2285h-3p	1.82288	3.04431	1.67005	3.38536	0	1.30505	0	-0.00216276	0.0824378	0.258011	0.95857	3.28934	0	0	6.43131	4.35954	9.61731	0	0	0	0	0	0	0
miR-190a-5p	1.59077	3.33636	2.09732	2.95429	0	1.54199	0	-0.00199137	0.0824325	0.255385	0.95857	6.03045	0	0	0	11.4438	3.20577	0	0	0	0	0	0	0
miR-130a-3p	1.51652	2.94362	1.94104	2.81639	0	1.33262	0	-0.00198169	0.082432	0.26752	0.95857	9.31979	0	6.10738	4.28754	0	0	0	0	0	0	0	0	0
mml-mir-7176-5p	1.27185	2.17692	1.71161	2.21361	0.173136	0.982042	0.158051	-0.00172763	0.0824178	0.253203	0.95857	4.38578	0	6.10738	5.00213	0	0	0	0	0	0	0	0	1.03882
spu-let-7-5p	0.894628	1.20323	1.34495	0.282017	1.60934	0.190744	0.561399	0.00297144	0.082444	0.249992	0.95857	0	0	0	1.42918	0.544943	0	0	2.1503	0	0.532582	0.799853	2.01804	4.15527
mmu-mir-6921-5p	0.742846	1.10868	1.49247	0.202315	1.37346	0.187307	0.522514	0.00144496	0.082403	0.267816	0.95857	0	1.4162	0	0	0	0	0	1.43353	0	0.532582	1.19978	4.03608	1.03882
miR-137-3p	16.6002	43.29	2.60779	6.57965	28.2909	3.90782	24.7718	0.00303078	0.0824522	0.29348	0.958835	0	0	27.4832	1.42918	0	0	17.1451	0	163.887	5.8584	0	0	0
miR-138-1-3p	10.1307	16.1777	1.5969	3.73061	17.5974	2.05812	8.45498	0.00390623	0.0824868	0.293318	0.958835	6.57867	0	0	15.721	3.8146	0	0	0	0	13.8471	0	41.8743	49.8632
xla-mir-106-5p	7.19335	13.2634	1.84384	4.17939	10.7096	1.97047	7.37656	0.00410825	0.0824764	0.295128	0.962022	0.548223	0	6.10738	0	8.17414	14.426	0	0.716767	0	1.06516	0	12.6127	49.8632
efu-mir-9198e-3p	7.91787	21.6825	2.73843	2.92632	13.7413	1.75994	12.4522	0.00241625	0.0824305	0.29661	0.964119	0	0	0	0	9.26402	11.2202	0	0	81.9436	0	0	0.504509	0
mse-mir-2779-3p	4.90639	11.9865	2.44303	6.92563	2.55062	5.8696	1.80882	-0.000890692	0.0823982	0.297118	0.964119	0	0	3.05369	0	0.544943	44.8808	0	0	0	3.19549	0	12.1082	0
miR-132-3p	608.202	145.222	0.238774	635.907	575.878	44.1508	68.1109	-0.0171963	0.0827929	0.299982	0.966834	663.35	752.713	763.423	678.146	620.69	391.104	581.926	708.166	491.661	504.355	605.489	833.954	311.645
miR-105a-5p	26.0707	22.0239	0.844774	18.0652	35.4106	3.33162	11.5347	0.00858523	0.0826882	0.29926	0.966834	13.1573	14.8702	21.3758	15.0064	10.8989	12.8231	38.3244	80.9947	0	45.2694	1.99963	33.2976	50.902
miR-202-5p	7.19706	12.4225	1.72605	6.05754	8.52649	3.50645	6.20028	-0.00108274	0.0823944	0.299699	0.966834	6.57867	0	0	8.57508	0	27.249	0	41.5725	0	9.58647	0	0	0
miR-2285bf-3-3p;miR-2285bf-2-3p	1644.54	605.881	0.368419	1796.89	1466.8	262.498	170.278	-0.021761	0.0841642	0.305661	0.968124	3290.98	1385.05	1590.97	951.119	2009.75	1408.94	1941.44	1946.02	1217.45	1087.53	1190.18	1210.32	2149.31
efu-mir-9277-3p	199.785	101.171	0.506401	231.682	162.572	38.7449	34.9902	-0.00824718	0.0824371	0.301963	0.968124	121.705	95.5938	360.336	353.722	142.775	269.285	278.356	126.868	269.243	86.8108	215.56	242.669	34.281
miR-155	123.054	402.225	3.26869	216.779	13.7085	200.278	11.208	-0.0013452	0.0824091	0.307729	0.968124	0	0	0	0	2.72471	1514.73	0	0	0	7.45614	0	0	74.7948
ipu-mir-99b-5p	20.9436	22.3814	1.06865	13.4225	29.7182	3.52835	11.8369	0.00914571	0.0828126	0.301097	0.968124	29.0558	15.5783	3.05369	6.43131	19.073	1.60288	19.1622	19.3527	11.7062	85.7456	3.59934	9.08117	48.8244
miR-2284w-3p	7.19476	9.32934	1.29668	7.63577	6.68025	2.30609	4.91014	0.00395525	0.0824248	0.302468	0.968124	0	16.9945	9.16108	3.57295	10.8989	12.8231	0	0	0	5.32582	0	1.51353	33.2421
ppy-mir-647-3p	6.16092	9.50042	1.54205	4.61565	7.96373	2.99274	4.40413	0.00331764	0.0824254	0.307526	0.968124	0	0.708102	9.16108	0	0	22.4404	0	0.716767	0	7.98872	6.39883	1.51353	31.1645
miR-197	6.08794	16.5085	2.71167	10.5453	0.887636	8.1038	0.810297	-0.000996331	0.0824002	0.306898	0.968124	0	0	9.16108	2.14377	0	62.5125	0	0	0	5.32582	0	0	0
miR-12008-5p	4.37351	11.6114	2.65495	1.97851	7.16767	1.59381	6.54316	0.000308229	0.0823963	0.307824	0.968124	0	0	12.2148	0	1.63483	0	0	43.006	0	0	0	0	0
miR-532-3p	3.95029	6.81068	1.7241	6.51709	0.95569	3.11574	0.872421	-0.00167656	0.0824105	0.304803	0.968124	10.9645	0	12.2148	0	0	22.4404	0	5.73414	0	0	0	0	0
oga-mir-28b-5p	3.75368	9.83139	2.61913	1.48557	6.39981	0.773459	5.64996	0.000582138	0.0823941	0.304918	0.968124	0	0	6.10738	2.14377	0.544943	1.60288	0	0	0	1.06516	0	37.3337	0
mmu-mir-12188-5p	1.42474	2.4153	1.69525	2.64595	0	1.04216	0	-0.00195667	0.0824306	0.306249	0.968124	3.28934	0	0	2.85836	4.35954	8.01442	0	0	0	0	0	0	0
let-7a-2-5p;let-7i-5p;let-7c-5p	3.39851	5.80371	1.70772	4.62749	1.96471	2.74271	1.13495	0.000401123	0.0823923	0.309311	0.970044	0	21.9512	3.05369	3.57295	3.8146	0	0	5.73414	0	0	0	6.05411	0
ggo-mir-766-5p	2.37688	6.60656	2.7795	0.548223	4.51032	0.507556	3.7419	0.0010613	0.0823956	0.30979	0.970044	3.83756	0	0	0	0	0	0	0	0	2.13033	0	0	24.9316
miR-186	2068.58	583.164	0.281915	2255.11	1850.96	174.476	258.29	-0.014639	0.0826854	0.312065	0.970975	2173.7	2257.43	3191.11	2142.34	2526.9	1691.04	1803.27	2122.35	538.486	1931.14	2575.93	2119.95	1817.93
hsa-mir-5100-3p;mmu-mir-5100-3p	39.3053	72.2488	1.83815	58.5277	16.8791	34.7607	9.20066	-0.00318949	0.0824119	0.312321	0.970975	6.57867	26.9079	21.3758	12.8626	5.99437	280.505	55.4696	0	58.5311	6.92356	0	35.8202	0
miR-362-5p	13.8566	20.4723	1.47744	20.9282	5.60638	9.48918	2.77809	-0.0049028	0.0825185	0.311289	0.970975	3.28934	0	27.4832	8.57508	5.44943	24.0433	77.6574	0	0	5.8584	0	9.08117	18.6987
miR-202	5.06079	8.15604	1.61161	7.42045	2.30785	3.55866	2.10677	-0.00157984	0.0823982	0.312802	0.970975	8.77157	0	0	16.4356	1.08989	25.6462	0	0	0	13.8471	0	0	0
mmu-mir-326-5p	4.3813	8.25836	1.88491	8.13671	0	3.70524	0	-0.00265206	0.0824496	0.314163	0.971385	0	28.3241	15.2685	4.28754	0	0	9.07684	0	0	0	0	0	0
bmo-mir-3411-5p	1.70513	4.23061	2.4811	3.16667	0	2.0217	0	-0.0019348	0.0824291	0.314292	0.971385	1.64467	0	0	2.85836	1.63483	16.0288	0	0	0	0	0	0	0
bmo-mir-2783-5p	3.02364	5.75363	1.90288	5.02173	0.692545	2.69321	0.632204	-0.00278488	0.0824557	0.315064	0.971673	0	0	0	2.14377	3.8146	8.01442	21.1793	0	0	0	0	0	4.15527
cbn-mir-64l-5p	1.03316	2.30694	2.23289	1.91873	0	1.0813	0	-0.00191801	0.0824292	0.317588	0.977352	8.22334	0	0	3.57295	1.63483	0	0	0	0	0	0	0	0
hsa-mir-6871-3p	0.809603	1.79189	2.2133	0.156635	1.5714	0.145016	0.975313	0.00175827	0.0824128	0.318406	0.977766	1.09645	0	0	0	0	0	0	0	0	3.19549	0	0	6.2329
miR-16b-5p;miR-16a-5p	1596.66	381.109	0.238692	1560.3	1639.08	176.477	97.4768	0.0216284	0.0841337	0.322503	0.979124	1187.45	2171.04	1667.32	1715.02	1729.1	1828.89	623.276	1617.03	1662.28	1226.54	1596.91	2047.8	1683.92
miR-1777a-5p	13.7574	30.5341	2.21947	8.47308	19.9224	2.75353	17.7367	0.00428186	0.0824787	0.322689	0.979124	0	0.708102	12.2148	20.0085	1.63483	9.61731	15.1281	1.43353	117.062	0	0	0	1.03882
miR-331-3p	12.9123	12.5643	0.973044	14.857	10.6436	5.08783	4.49204	-0.00216729	0.0823738	0.320493	0.979124	16.9949	28.3241	0	13.5772	38.6909	6.41154	0	27.9539	0	20.2381	0	14.6308	1.03882
miR-107	6.87901	15.5186	2.25593	2.38244	12.125	1.44703	8.69465	0.00286752	0.0824371	0.322336	0.979124	0	0	0	0	0	9.61731	7.05976	0	58.5311	13.3145	0.399927	0.504509	0
miR-2285ad-3p	3.5012	5.29694	1.51289	5.44866	1.22917	2.39395	0.856498	-0.00286259	0.0824309	0.321847	0.979124	10.4162	0	18.3222	0	4.35954	0	5.04269	0.716767	0	5.8584	0.799853	0	0
miR-191b-5p	3.0804	3.87613	1.25832	4.73166	1.15393	1.5254	1.05339	-0.00259501	0.082429	0.322953	0.979124	10.4162	0	6.10738	6.43131	1.08989	0	9.07684	0	0	6.92356	0	0	0
miR-7-3-5p	1.12734	1.42871	1.26732	0.866581	1.43157	0.417705	0.686276	0.000533757	0.0823904	0.324238	0.980939	0	2.83241	0	2.14377	1.08989	0	0	0.716767	0	0.532582	2.79949	4.54058	0
miR-30b-5p;miR-30f-5p	3.44835	4.64872	1.3481	5.76611	0.7443	1.98146	0.443417	-0.00324551	0.082441	0.325583	0.98293	3.83756	0	12.2148	10.7188	11.9887	1.60288	0	0	0	0	0.399927	3.02706	1.03882
miR-2285cv-1-3p	7.85556	15.3332	1.95189	2.77703	13.7805	1.53384	8.41614	0.000848068	0.0823925	0.327198	0.983656	1.09645	0	12.2148	2.85836	3.26966	0	0	0	0	9.05389	57.9894	15.6398	0
bma-mir-5846-1-5p_bma-mir-5846-2_stem-loop	3.76913	6.83707	1.81397	6.77156	0.266291	3.09325	0.243089	-0.00210572	0.0824186	0.327105	0.983656	0	21.9512	6.10738	0	0	3.20577	16.1366	0	0	1.59774	0	0	0
miR-320a-2-5p	6.3845	11.9299	1.86857	11.0481	0.943649	5.54878	0.569293	-0.00133627	0.0823996	0.329279	0.987838	0	0	33.5906	0	0	33.6606	10.0854	0	0	2.13033	0	3.53157	0
miR-216b	340.204	129.875	0.381758	373.1	301.825	37.5643	60.9471	-0.0117877	0.0827665	0.332079	0.988313	568.507	422.029	250.403	260.111	349.308	375.075	386.27	434.361	0	356.297	234.757	415.716	369.819
hsa-mir-4763-3p	5.79052	11.5432	1.99347	9.71799	1.20846	5.46744	0.964533	-0.00160367	0.0823991	0.3322	0.988313	0	39.6537	0	3.57295	0	1.60288	23.1964	6.4509	0	0	0.799853	0	0
sme-mir-12-3p	2.72565	3.65023	1.33921	4.30483	0.883284	1.61023	0.481421	-0.00333231	0.0824441	0.330599	0.988313	7.67512	5.66482	12.2148	0	0.544943	0	4.03415	0	0	3.19549	1.59971	0.504509	0
miR-2285bn-3p	1.28397	2.50139	1.94818	2.38451	0	1.13363	0	-0.00189498	0.0824274	0.331766	0.988313	0	0	0	0	3.8146	4.80865	8.0683	0	0	0	0	0	0
miR-219-3p	12.482	17.3887	1.3931	17.9916	6.05411	6.95585	5.52662	-0.00147787	0.0823844	0.333802	0.988967	15.3502	51.6915	0	5.71672	14.7135	38.4692	0	0	0	0	0	36.3247	0
hsa-mir-2682-5p	1.41405	2.78262	1.96784	2.62609	0	1.26474	0	-0.00194369	0.0824299	0.333222	0.988967	4.93401	0	9.16108	4.28754	0	0	0	0	0	0	0	0	0
miR-769-5p	21.0264	16.3462	0.777414	27.5398	13.4274	7.08875	3.19664	-0.00556218	0.082445	0.334975	0.99039	19.736	0	64.1275	29.2982	16.3483	40.0721	23.1964	26.5204	0	10.6516	15.1972	12.6127	15.5823
let-7g-5p	1143.89	364.654	0.318784	1017.36	1291.51	110.342	157.165	0.0207713	0.0839171	0.338426	0.992394	1072.87	1050.12	626.007	575.959	1463.72	1186.13	1146.71	984.121	1041.85	1549.81	751.062	1607.37	1814.81
miR-664b-5p	528.981	239.001	0.451815	497.138	566.13	81.992	105.118	0.012984	0.0827452	0.3377	0.992394	339.898	843.35	473.322	583.105	162.393	363.855	714.045	336.881	1053.56	731.235	348.336	540.33	386.44
miR-2285n-7-5p	4.92089	8.92622	1.81394	6.71227	2.83095	4.24295	1.70788	-0.000903587	0.082395	0.337392	0.992394	0	0	6.10738	2.85836	4.35954	33.6606	0	0	0	6.39098	0	10.5947	0
pbv-mir-551a-5p	4.0803	7.03411	1.72392	5.57789	2.3331	3.34224	1.31074	0.000323764	0.0823895	0.33809	0.992394	0	0	18.3222	20.7231	0	0	0	2.86707	0	9.05389	0	0	2.07763
miR-128-2-3p	1465.19	400.633	0.273434	1666.2	1230.68	164.765	63.1512	-0.0202491	0.0828611	0.347068	0.993404	1420.45	2125.02	2018.49	2256.67	1580.33	1189.34	1073.08	1412.75	1158.92	1224.94	977.021	1427.26	1183.21
ssc-mir-664-5p	171.777	91.5628	0.533032	138.985	210.036	19.6625	45.257	0.01101	0.0827328	0.346631	0.993404	116.771	118.961	131.309	158.639	47.9549	168.303	230.955	209.296	0	217.826	298.745	180.11	354.237
miR-449b-3p	62.3227	42.4209	0.680666	43.1802	84.6556	9.79726	19.0999	0.0043383	0.0823844	0.343337	0.993404	32.8934	83.5561	12.2148	74.3173	34.8763	51.2923	13.111	88.1624	128.768	49.5301	129.976	111.497	0
miR-12022-3p	45.5773	47.1376	1.03423	33.4665	59.7065	8.0421	25.545	0.00632347	0.0825222	0.340624	0.993404	38.3756	8.49723	79.396	37.1587	19.6179	32.0577	19.1622	62.3587	187.3	71.8985	0	24.2165	12.4658
miR-2435-5p	45.4915	30.046	0.660475	51.692	38.2575	12.4774	9.89424	-0.00558761	0.082421	0.354738	0.993404	103.614	58.7725	70.2349	10.0043	58.3089	60.9096	0	32.2545	0	73.4963	61.5887	39.3517	22.854
ola-mir-203-3p;mdo-mir-203-3p;ssa-mir-203a-1-3p	36.6844	31.796	0.866745	40.9459	31.7126	9.87439	14.9905	-0.00547945	0.0825365	0.352492	0.993404	38.9238	0.708102	61.0738	15.0064	86.1009	46.4837	38.3244	14.3353	46.8249	22.3684	0.799853	105.947	0
tgu-mir-1559-3p	36.1135	40.725	1.1277	51.1159	18.6107	17.4816	9.3875	-0.00638781	0.0825459	0.344055	0.993404	18.0914	14.8702	33.5906	45.7337	22.8876	157.083	65.555	0	0	14.9123	1.59971	31.7841	63.3678
gga-mir-1388b-3p	15.5126	19.9472	1.28587	14.9989	16.112	5.17224	10.3518	0.00347433	0.0824118	0.348986	0.993404	2.74111	39.6537	6.10738	7.86049	27.7921	20.8375	0	0	70.2373	2.66291	0	21.6939	2.07763
miR-6119-3p	10.6877	14.1053	1.31977	14.8185	5.86838	5.83024	4.28852	-0.00221377	0.0823871	0.350618	0.993404	18.0914	47.4429	3.05369	0	0.544943	14.426	20.1708	6.4509	0	28.7594	0	0	0
hsa-mir-7108-5p	9.90267	11.5926	1.17065	7.44975	12.7644	2.49395	6.12605	0.00383764	0.0824204	0.341704	0.993404	2.19289	0.708102	12.2148	17.8647	2.72471	14.426	2.01708	0	0	11.1842	38.393	0	27.0092
miR-183	9.4889	12.9707	1.36694	14.6294	3.4916	5.79652	1.97165	-0.00329654	0.0824451	0.353672	0.993404	10.9645	0	18.3222	0	33.7864	0	39.333	0	0	1.06516	0	12.6127	7.27172
miR-2285cb-5p;miR-2284y-1-3p;miR-2284y-4-5p	6.84945	9.7535	1.42398	9.28084	4.01281	4.28924	2.6117	-0.000746485	0.0823926	0.352012	0.993404	0	0	15.2685	0.71459	18.528	30.4548	0	0	0	6.92356	0	17.1533	0
cfa-mir-8874-3p	6.81841	15.3005	2.24399	2.49293	11.8648	1.41081	8.5992	0.00349767	0.082454	0.347979	0.993404	3.83756	0	0	1.42918	1.08989	0	11.0939	5.73414	58.5311	6.92356	0	0	0
ggo-mir-502b-5p	6.78178	7.80066	1.15024	5.28424	8.52891	3.16707	2.71597	-0.00137174	0.0823815	0.347235	0.993404	4.38578	0	6.10738	1.42918	25.0674	0	0	12.185	0	7.45614	16.397	15.1353	0
let-7a-2-5p;miR-3596-5p;let-7a-3-5p	4.51332	7.36193	1.63116	6.36385	2.35438	3.15046	2.14924	-0.00180085	0.0824117	0.351148	0.993404	12.0609	0	0	9.28967	0	0	23.1964	0	0	0	0	14.1263	0
ppy-mir-1233-3p	4.20229	8.26662	1.96717	4.18625	4.22101	3.03953	3.47882	-0.000788609	0.0823894	0.351594	0.993404	0	0	6.10738	0	0	0	23.1964	0	0	2.13033	23.1957	0	0
miR-2285v-3p	3.36489	4.52479	1.34471	4.61536	1.90601	2.00989	1.11181	-0.00151402	0.0823987	0.352785	0.993404	0	2.12431	0	5.00213	13.0786	0	12.1025	0	0	6.39098	0	5.04509	0
let-7b-3p	3.1048	5.83719	1.88005	1.12854	5.41044	0.738709	3.14895	0.00222828	0.0824158	0.354289	0.993404	0.548223	0	0	5.71672	1.63483	0	0	17.9192	0	0	0	0	14.5434
gga-mir-6687-3p	2.96883	5.86268	1.97474	5.05704	0.532582	2.75599	0.486178	-0.00139641	0.0824064	0.351616	0.993404	0	0	3.05369	0	0	19.2346	13.111	0	0	3.19549	0	0	0
miR-11992-5p	2.94362	6.08772	2.06811	0.701109	5.55988	0.569018	3.28992	0.00213319	0.082424	0.350738	0.993404	0.548223	0	0	0	4.35954	0	0	0	0	0	0	13.6218	19.7375
mmu-mir-1982-5p	2.62335	5.46213	2.08212	4.8148	0.0666544	2.53499	0.0608469	-0.00175108	0.0824164	0.35315	0.993404	0	0	18.3222	4.28754	0	0	11.0939	0	0	0	0.399927	0	0
miR-2285dl-1-3p	1.43591	3.59283	2.50212	2.52255	0.16817	1.7441	0.153517	-0.00234295	0.0824395	0.352004	0.993404	13.7056	0	0	0.71459	1.63483	1.60288	0	0	0	0	0	1.00902	0
pal-mir-34b-3p	0.919975	1.26626	1.37641	1.50324	0.239503	0.559353	0.0991554	-0.00366101	0.0824769	0.342661	0.993404	2.19289	0.708102	0	0.71459	1.08989	4.80865	1.00854	0	0	0.532582	0.399927	0.504509	0
miR-34b-3p	205980	30823.8	0.149645	213221	197532	11557.7	11797.8	-0.0109039	0.078269	0.679667	0.997856	241440	251944	191613	240524	163935	188594	214495	246572	217818	167454	180730	166874	205743
miR-100-5p	173309	34843.6	0.201049	168289	179167	12045.3	15176.1	-0.000695848	0.0790231	0.959467	0.997856	214609	181038	176491	181951	174152	144204	105576	183020	175956	189372	249122	140135	137396
miR-191-5p	115774	19648.8	0.169717	108580	124168	4942.43	9184.81	0.015612	0.0796108	0.55844	0.997856	101824	113156	82645.1	106229	115728	128279	112196	162364	106971	91115.7	121053	137461	126042
miR-30d-5p	69638.7	13852.9	0.198925	68330	71165.6	5851.87	4686.82	-0.000503136	0.0790079	0.967873	0.997856	77027	66771.9	65721.6	72996	96544.2	55769.2	43480.1	64883.2	59093	66182.8	94004	76847.9	65982.5
miR-21-5p	29788.7	7212.56	0.242124	30161.2	29354.1	3174.23	2238.91	-0.00345568	0.0796061	0.861509	0.997856	33777.1	24192.3	26942.7	18490	43825.9	39206.6	24694	22765.2	29616.7	30676.7	22036	37212.1	33817.7
miR-425-5p	18776.5	5328.45	0.283783	16932	20928.4	1482.43	2414.19	0.0139796	0.0817823	0.467635	0.997856	22512.2	17594.2	19729.9	18614.3	17103.6	13227	9742.47	27002.8	26701.9	24588.2	21026.5	11640	14611
miR-125b	16212.4	2746.91	0.169432	15547.1	16988.7	1150.17	858.876	0.00623844	0.0784894	0.806785	0.997856	15856.8	15068.4	15054.7	21888.6	14254.6	10829.1	15877.4	21092.3	16564.3	16082.9	17685.6	16304.2	14202.7
miR-93-5p	15975.6	4931.2	0.308671	15070.9	17031.1	1420.88	2385.01	0.00210419	0.0802024	0.926877	0.997856	21628.5	9806.51	13424	14641.9	18920.4	11835.7	15239	21326	14749.8	25724.2	6963.92	15296.2	18126.3
miR-125b-1-5p;miR-125b-2-5p	13932.2	1822.88	0.130839	13167.9	14823.9	662.743	596.664	0.0250474	0.0810793	0.39726	0.997856	13106.9	12905.2	13338.5	16977.2	12505.9	10673.6	12668.2	14015.7	16552.6	14062.3	16992.9	14428	12891.7
miR-375-3p	12627.1	3262.25	0.258354	13501.4	11607	1399.27	925.208	-0.0113191	0.0811937	0.524554	0.997856	16454.9	16537	16590.7	15662.4	13069.9	9708.67	6485.91	10050.5	12794.9	10427.4	15757.5	11883.7	8728.14
miR-151-5p	12197.5	2102.19	0.172346	12322	12052.4	892.647	710.454	0.00463693	0.0783794	0.857978	0.997856	9662.98	12293.4	10367.3	17568.2	11559.3	12268.5	12534.1	14546.8	10746.3	11724.8	9251.5	12570.4	13474.5
miR-30e-5p	11053.2	2325.43	0.210386	10874.4	11261.8	1133.01	438.205	0.00491317	0.0792932	0.838792	0.997856	13294.4	10655.5	12562.9	7896.93	15967.9	8678.02	7064.81	11651.8	9926.88	10396.5	10606.9	11876.7	13111.9
miR-204	10438.1	2909	0.278691	10665.3	10173	1211.96	1017.26	-0.00775791	0.0807301	0.654611	0.997856	14691.3	12655.9	12959.9	13269.9	7156.19	6892.4	7031.52	14928.8	10711.2	7385.31	10534.1	9819.27	7659.2
miR-16a-5p	9462.09	1669.78	0.17647	9343.77	9600.13	619.901	691.296	-0.000651344	0.0782161	0.970687	0.997856	11323	8209.74	8266.34	9375.42	12222.5	8548.18	7461.16	10131.5	6473.54	9032.58	9311.89	10698.6	11952.6
miR-100	8136.5	1996.24	0.245344	7853.93	8466.17	633.749	926.662	-0.00257113	0.0798342	0.88028	0.997856	10244.6	8728.07	8315.2	8390.71	8189.94	6557.4	4551.53	9675.64	8170.94	8012.16	12690.9	6532.89	5714.53
miR-15b-5p	7105.37	1371.2	0.19298	7526.09	6614.53	403.341	618.831	-0.012935	0.0808779	0.450035	0.997856	6444.91	8073.08	7368.56	8613.66	8568.13	8067.32	5546.96	8300.16	3476.75	6433.59	7350.65	7310.34	6815.68
let-7e-5p	6483.06	1593	0.245717	6469.96	6498.36	735.335	424.641	0.00661918	0.0798913	0.854641	0.997856	4757.48	7214.15	6070.74	5459.47	4635.83	6385.89	10766.1	6153.45	6801.32	6644.49	4470.38	7845.12	7075.38
gga-mir-12238-3p	5685.48	3212.41	0.56502	6651	4559.05	1400.33	815.31	0.00393248	0.0814832	0.76843	0.997856	2224.14	9335.62	12227	8074.15	1273.53	4808.65	8613.92	3132.99	7655.87	2409.93	5069.87	2615.88	6469.75
miR-200b-3p	5076.87	1510.07	0.297441	4781.38	5421.61	432.611	729.331	0.0042393	0.0802381	0.839688	0.997856	4957.03	3667.97	3615.57	3348.57	6293	5517.13	6070.39	5043.89	3266.04	6591.76	3107.03	7920.29	6600.64
miR-186-5p	4737.44	1039.12	0.219343	5027.63	4398.89	448.67	283.628	-0.00917406	0.0800189	0.64475	0.997856	4636.32	5256.24	7301.38	4484.05	5884.84	4324.58	3305.99	4135.03	3254.33	4253.2	5531.39	4858.43	4360.95
miR-28-5p	4616.9	1056.04	0.228734	4850.98	4343.81	492.411	222.73	0.00265502	0.0792278	0.9548	0.997856	3343.06	5225.09	4314.87	7230.22	4058.19	6094.17	3691.25	4316.37	3909.88	3395.21	4834.31	4673.78	4933.34
miR-34b-5p	3922.73	1458.3	0.371756	3833.76	4026.52	564.449	575.293	-0.0107241	0.0812161	0.575156	0.997856	6849.5	2454.28	2723.89	3352.85	5117.56	2612.7	3725.54	5959.92	1709.11	5241.67	3045.04	3680.4	4523.01
miR-25-3p	3891.54	1674.59	0.430316	3988.91	3777.95	693.345	595.26	-0.00459594	0.0816698	0.658111	0.997856	5700.42	6705.73	4327.08	5008.56	2306.2	2585.45	1288.91	5350.67	4108.88	4165.32	5324.62	2224.38	1493.82
miR-30a-5p	3453.54	885.054	0.256275	3362.67	3559.55	384.345	279.861	0.00782896	0.0802941	0.713105	0.997856	3957.07	2563.33	4162.18	2856.93	5123.01	2958.93	1917.23	2872.09	2704.14	4227.1	3548.95	3379.2	4625.85
miR-335-5p	3450.16	1135.08	0.328994	3522.58	3365.66	385.048	511.124	-0.00534158	0.0805911	0.773715	0.997856	5242.11	3000.23	2949.87	2154.49	4741.55	3628.93	2940.9	3975.19	1463.28	2976.6	3448.97	2754.62	5575.33
miR-200c-3p	2946.53	773.941	0.262661	3038.95	2838.71	217.626	385.017	-0.0130063	0.081375	0.495817	0.997856	2952.73	2477.65	2494.87	2520.36	3907.24	3862.95	3056.88	2570.33	1416.45	2878.6	2435.15	4561.27	3170.47
miR-27b-3p	2844.48	551.773	0.19398	2817.93	2875.45	207.617	225.774	0.0060125	0.0793065	0.792848	0.997856	2469.2	2467.03	3523.96	2571.09	3782.99	2694.45	2216.77	2454.93	2013.47	3362.72	2661.11	3627.42	3133.07
miR-146b-5p	2829.9	1680.6	0.593873	2648.44	3041.6	447.092	856.729	0.00407014	0.0815276	0.786865	0.997856	4067.27	1799.29	1242.85	1440.61	4505.04	3026.25	2457.81	1538.18	1720.82	2310.34	843.445	6418.37	5418.47
miR-16b	2686.2	495.943	0.184626	2535.01	2862.59	156.019	214.607	0.005982	0.0789513	0.801952	0.997856	2866.11	2620.69	2400.2	2879.08	2896.91	2441.19	1640.89	3301.43	2341.24	2278.92	3385.78	3467.49	2400.71
miR-125a-5p	2680.18	719.709	0.26853	2708.23	2647.45	281.011	281.485	0.000752459	0.080124	0.960551	0.997856	1976.34	2474.82	1963.52	3848.07	2524.72	3829.29	2340.82	3034.79	2470.01	1954.04	3855.29	1801.1	2769.49
miR-27a-3p	2545.94	641.153	0.251833	2718.57	2344.55	225.662	258.028	-0.00831516	0.0805647	0.638459	0.997856	2477.97	2966.24	3685.81	2516.07	3126.88	2646.36	1610.63	2391.14	2001.76	1630.76	2223.59	3656.18	2163.86
miR-26b-5p	2497.52	1076.18	0.4309	2449.89	2553.09	218.733	593.422	0.00399685	0.0811837	0.796671	0.997856	1832.71	2328.95	2052.08	2147.34	3369.93	3308.35	2109.86	2278.6	1439.87	1703.2	1161.39	5396.74	3338.76
miR-2285aj-5p	2489.21	640.514	0.257316	2516.65	2457.2	282.95	197.129	-0.00760751	0.0798453	0.742161	0.997856	4019.57	1777.34	2788.02	2100.18	2952.5	2239.23	1739.73	2249.93	1873	3035.18	2203.2	2187.55	3194.36
let-7a-5p	2338.14	1647.54	0.704638	2274.35	2412.57	673.156	601.427	0.00205468	0.0818004	0.871051	0.997856	623.878	1084.81	1493.26	773.186	1967.24	4560.21	5417.86	2056.4	819.436	2448.81	588.692	4128.4	4433.67
miR-449a-5p	2329.51	815.979	0.35028	2248.85	2423.6	250.299	390.413	0.00140091	0.0807892	0.945529	0.997856	2729.05	1653.42	1707.01	2005.85	3525.78	1596.47	2524.37	2224.13	2153.95	2687.94	719.468	3916	2840.13
miR-16b-5p	2306.02	610.888	0.26491	2275.14	2342.05	190.356	291.614	-0.00874399	0.080799	0.741553	0.997856	2948.34	1916.13	1679.53	2213.08	3116.53	2064.52	1987.83	2644.15	796.023	2827.48	2524.74	2360.6	2899.34
miR-146a-5p	2251.27	1486.44	0.66027	2074.62	2457.35	511.216	654.996	0.00440017	0.0816851	0.75995	0.997856	4430.19	817.15	537.45	1032.58	3566.1	2034.06	2104.82	1046.48	1182.33	2704.45	855.043	3758.6	5197.2
miR-103	2226.47	747.199	0.335598	2155.53	2309.23	258.414	329.542	-0.00870381	0.0807292	0.637042	0.997856	3068.4	1711.48	1618.46	1373.44	1602.13	2699.26	3015.53	3567.35	1240.86	2901.5	1401.74	2332.85	2411.09
miR-106b-3p	2198.06	523.411	0.238124	2255.57	2130.98	242.077	133.318	0.00286416	0.07994	0.880116	0.997856	2080.51	3061.13	2192.55	3086.31	2524.17	1287.12	1557.18	1542.48	2259.3	2264	2277.18	2554.33	1888.57
miR-125b-1-5p	2179.49	420.06	0.192733	2012.64	2374.15	118.644	181.191	0.0139023	0.0798923	0.570972	0.997856	2153.97	1962.15	1945.2	2552.51	1852.8	1447.4	2174.41	2405.47	2470.01	2370.52	3213.81	1929.75	1855.33
let-7c-5p	1952.39	834.612	0.427481	1963.08	1939.92	332.476	317.861	0.00148259	0.0810131	0.918444	0.997856	1437.99	2039.34	1682.58	1196.22	1024.49	2622.32	3738.65	1968.24	1065.27	2074.94	933.829	2370.69	3226.57
miR-128-1-3p;miR-128-2-3p	1874.33	458.256	0.244491	2063.86	1653.2	195.474	93.2191	-0.0153456	0.0816839	0.466986	0.997856	1977.99	2246.1	2534.56	2711.87	2188.49	1766.38	1021.65	1984.73	1486.69	1944.99	1386.55	1537.24	1579
miR-340-5p	1870.4	625.258	0.334292	2018.44	1697.68	224.439	251.753	-0.00999614	0.081382	0.551944	0.997856	1908.36	2088.19	1667.32	1524.22	3373.19	2046.88	1520.87	1269.39	889.673	1797.46	1306.96	2702.66	2219.95
miR-140-3p	1853.44	838.529	0.452418	1814.82	1898.49	258.994	402.467	0.00611148	0.0814984	0.676046	0.997856	1515.84	1816.28	1148.19	2633.26	3036.97	1348.03	1205.2	1146.83	737.492	1826.22	1266.97	3420.57	2992.83
miR-22-3p	1743.97	391.561	0.224523	1762	1722.93	136.531	172.791	-0.00677759	0.0794963	0.706296	0.997856	2417.66	1784.42	1343.62	1484.2	2160.15	1575.64	1568.28	2062.86	1252.57	1439.57	2206.4	1228.98	2147.23
miR-103-1-3p;miR-103-2-3p	1709.49	757.167	0.442919	1522.93	1927.14	276.389	297.299	0.00673989	0.0813978	0.690508	0.997856	1804.75	667.033	1013.83	1074.03	1564.53	1444.2	3092.18	2348.13	1416.45	2479.17	539.101	2185.03	2594.97
miR-29a-3p	1667.04	546.979	0.328114	1783.61	1531.04	190.554	229.981	-0.0121874	0.0818228	0.488449	0.997856	2683	2012.43	1642.89	1505.64	2148.71	1481.07	1011.56	2214.09	678.961	1832.61	1218.18	1117.99	2124.38
miR-2284x	1656	431.417	0.260517	1787.87	1502.16	169.89	143.524	-0.0146798	0.0820951	0.396286	0.997856	2076.12	2146.26	2299.43	1737.17	1900.21	1479.46	876.419	1634.23	877.967	1713.31	2014.03	1361.67	1411.75
miR-106b-5p	1591.23	750.729	0.471793	1593.94	1588.07	260.351	333.552	-0.000799382	0.0813968	0.939473	0.997856	1484.59	533.201	1236.75	1102.61	2804.82	2104.59	1891.01	1809.84	550.193	1844.33	465.115	2168.38	2690.54
miR-25	1572.54	715.044	0.454707	1692.12	1433.02	323.519	190.124	-0.00535264	0.0816451	0.655422	0.997856	2618.31	2905.34	1801.68	2072.31	832.672	1218.19	396.355	1590.51	1837.88	959.712	2170.8	1054.42	984.799
ssc-mir-4332-5p	1461.86	1041.94	0.712748	1474.3	1447.35	381.174	440.694	0.00536741	0.0820984	0.58692	0.997856	590.436	2383.47	1942.15	788.907	106.809	1322.38	3185.97	458.014	3500.16	896.867	2033.63	374.346	1421.1
miR-20a	1280.25	647.539	0.505791	1232.45	1336.01	199.091	310.65	0.00319336	0.0817091	0.798614	0.997856	818.497	722.973	851.98	1397.74	2367.23	1073.93	1394.81	1548.22	468.249	1586.03	165.57	2153.75	2094.26
miR-23b-3p;miR-10174-3p	1203.63	425.407	0.353438	1323.57	1063.7	117.714	201.071	-0.0111137	0.0824004	0.368059	0.997856	1211.02	1322.03	1154.3	1524.93	1313.86	1913.84	824.984	1415.62	199.006	725.909	1089	1729.96	1222.69
miR-20a-5p	1194.74	713.343	0.597071	1075.75	1333.55	183.277	363.414	0.00163489	0.0818339	0.914008	0.997856	1069.03	376.002	711.51	897.525	2020.1	1064.32	1391.78	1993.33	175.593	1510.93	95.5825	2428.71	1797.15
miR-3432b-5p	1169.81	339.821	0.290492	1274.29	1047.92	118.446	134.186	-0.011567	0.0820083	0.443241	0.997856	957.197	1676.79	1716.17	1362.01	822.318	1146.06	1239.49	1523.13	1240.86	1139.19	861.042	1059.97	463.312
miR-34c-5p	1058.94	506.249	0.478072	1046.07	1073.95	133.283	261.342	-0.00111399	0.0816417	0.906868	0.997856	1392.49	604.72	845.873	889.664	1650.63	730.915	1208.23	1494.46	58.5311	1463	343.137	1290.54	1794.04
let-7a-2-5p	980.478	378.681	0.386221	966.822	996.41	168.098	115.081	0.00305436	0.0809312	0.859878	0.997856	607.431	976.473	668.759	630.983	597.257	1615.71	1671.15	868.722	585.311	1093.92	782.257	1220.91	1427.33
miR-7859-3p	976.131	299.772	0.307103	1014.4	931.488	61.9234	163.14	-0.0101675	0.0818459	0.501464	0.997856	1364.53	1018.96	916.108	1028.29	1050.65	801.442	920.795	1414.9	163.887	1019.89	1112.6	721.448	1156.2
miR-92a-1-3p;miR-92a-2-3p	923.678	324.159	0.350943	943.171	900.937	133.166	116.826	-0.0055269	0.0812374	0.674465	0.997856	824.527	881.588	861.141	1275.54	681.723	1607.69	469.979	950.433	643.842	1019.89	1450.53	657.376	683.542
miR-2887-2-3p	922.742	763.497	0.827422	947.39	893.985	251.512	352.341	0.00599896	0.0819421	0.634268	0.997856	851.938	692.524	2418.52	463.769	188.005	1155.68	861.291	330.43	2786.08	303.039	668.277	495.933	780.152
miR-204-3p	905.875	532.202	0.587501	809.455	1018.36	142.174	266.179	0.0124636	0.0827839	0.364561	0.997856	699.532	997.008	919.161	784.619	191.275	565.818	1508.77	1199.15	2364.66	660.401	617.087	387.968	880.917
miR-15b	872.456	237.669	0.272414	841.841	908.173	70.3992	115.14	0.0105428	0.0812515	0.587925	0.997856	702.274	752.713	690.134	806.772	969.998	1243.84	727.156	1200.58	889.673	840.414	346.736	1020.62	1151.01
miR-320a-2-3p;miR-320a-1-3p	867.725	644.248	0.742456	938.111	785.607	211.372	294.927	0.00442085	0.0818719	0.696751	0.997856	363.472	1075.61	925.269	921.106	152.584	2032.46	1096.28	677.345	2376.36	447.369	365.133	289.588	557.845
miR-30b-5p	835.25	366.245	0.438485	794.552	882.731	109.735	177.058	0.00255025	0.081357	0.870771	0.997856	860.162	351.219	561.879	591.68	1037.57	889.601	1269.75	1447.87	749.198	671.053	142.774	964.118	1321.38
miR-1839-5p	829.985	229.834	0.276913	811.709	851.306	69.24	111.396	0.00252428	0.0797511	0.726191	0.997856	991.187	519.747	748.154	1102.61	772.184	663.594	884.488	749.738	1357.92	819.11	543.9	616.006	1021.16
miR-15b-3p	827.552	209.721	0.253424	766.787	898.444	60.3746	96.7772	0.000379405	0.0794654	0.954654	0.997856	932.527	490.007	723.725	821.778	916.049	589.862	893.564	1148.26	1194.03	1004.98	650.281	824.873	568.233
miR-2284x-5p	810.679	203.756	0.25134	838.318	778.434	89.2502	61.8729	-0.0105991	0.0807831	0.599221	0.997856	1209.93	756.962	714.564	896.81	1067.54	799.84	422.577	754.039	749.198	1066.23	739.464	552.438	809.239
miR-335	807.007	235.674	0.292034	781.337	836.955	118.349	26.7354	-0.00445795	0.0799761	0.82316	0.997856	1303.13	730.054	601.577	481.633	1221.22	604.288	527.465	956.884	772.611	803.133	776.258	884.91	827.937
miR-190b-5p	790.299	294.137	0.372185	687.902	909.762	63.8495	145.863	0.00384588	0.0806723	0.824963	0.997856	895.248	911.328	531.342	543.088	718.234	453.616	762.455	910.294	948.204	740.288	850.244	1602.32	407.216
miR-26a	784.044	462.833	0.590315	788.078	779.338	158.839	207.383	-0.00356054	0.0817843	0.70454	0.997856	576.73	538.866	650.436	380.876	1105.69	1683.03	580.918	725.368	854.554	621.523	200.763	1816.74	457.08
miR-628-3p	776.903	173.81	0.223722	725.495	836.878	49.1818	80.6438	0.0152659	0.0815888	0.453425	0.997856	666.091	810.069	928.322	859.651	590.173	660.389	563.773	633.622	632.136	998.058	1144.99	924.766	687.697
miR-30f-5p	772.818	322.788	0.417676	777.826	766.975	66.8988	177.546	0.00181956	0.0807724	0.906307	0.997856	975.289	638	543.557	602.399	883.352	1030.65	771.531	1141.81	573.605	430.859	355.535	542.852	1557.19
miR-30d	749.828	314.318	0.419187	711.8	794.195	100.213	146.281	0.00805507	0.0818618	0.537835	0.997856	616.751	505.585	986.342	722.45	888.256	1032.26	230.955	629.322	1498.4	568.797	747.063	942.424	379.168
miR-132	747.604	136.365	0.182403	748.297	746.795	31.9535	72.9731	-0.0182618	0.081936	0.37674	0.997856	770.801	624.546	787.852	813.918	830.493	610.699	799.77	672.328	831.142	869.706	854.643	874.819	378.129
miR-2483-5p	742.994	206.126	0.277426	791.311	686.624	91.0232	55.5172	-0.00415006	0.0802339	0.807018	0.997856	911.695	1233.51	711.51	951.119	658.836	626.728	445.774	846.502	760.905	709.399	672.277	407.644	723.017
miR-99b-5p	707.124	365.535	0.516932	661.293	760.593	74.2877	199.634	-0.000735402	0.0815388	0.893479	0.997856	605.786	646.498	580.201	1051.16	568.375	799.84	377.193	1135.36	339.481	614.067	1662.9	284.039	527.719
miR-26a-1-5p;miR-26a-2-5p	701.56	357.35	0.509365	588.263	833.739	86.9273	174.416	0.00702298	0.0815566	0.633753	0.997856	585.502	211.723	601.577	433.756	940.571	490.483	854.231	977.67	526.78	649.75	384.33	1694.14	769.763
miR-130b-5p	682.963	202.596	0.296644	710.629	650.685	48.0502	106.569	-0.00984065	0.0818836	0.445184	0.997856	818.497	744.924	851.98	835.355	610.336	617.111	496.201	662.293	128.768	932.55	864.641	732.043	583.815
miR-423-5p	632.964	292.039	0.461384	631.854	634.258	106.367	124.089	0.00557639	0.0817212	0.676642	0.997856	634.842	1052.95	592.416	543.088	80.1066	883.19	636.387	579.865	1252.57	558.678	555.098	238.128	621.213
miR-6526-2-3p;miR-6526-3-3p	603.864	320.687	0.531059	650.416	549.553	118.763	130.483	-0.000596421	0.0818661	0.923914	0.997856	350.863	304.484	671.812	875.372	1225.58	767.782	357.022	342.615	11.7062	574.123	522.704	908.117	938.052
miR-7859	602.507	132.016	0.219111	589.748	617.392	31.9677	69.5266	0.00531725	0.079802	0.815209	0.997856	693.502	672.697	485.537	622.408	650.117	528.952	475.021	854.386	538.486	512.876	715.869	342.057	740.677
hsa-mir-6089-1-3p_hsa-mir-6089-2_stem-loop	586.641	431.615	0.73574	715.503	436.301	197.562	84.5626	-0.00994595	0.0825598	0.364357	0.997856	222.578	848.307	485.537	599.541	196.179	796.634	1859.74	229.365	327.774	216.761	704.671	416.22	723.017
miR-7	569.172	256.187	0.450105	482.434	670.367	60.7525	124.528	0.00893612	0.0814835	0.617187	0.997856	766.416	442.564	305.369	333.713	677.909	410.339	440.731	262.337	362.893	729.104	829.448	1188.12	650.299
miR-17-5p	510.633	156.501	0.306485	501.077	521.782	52.8378	70.7537	-0.00104961	0.0804649	0.943737	0.997856	454.477	342.722	390.873	386.593	721.504	522.54	688.831	730.386	351.187	467.074	263.952	674.025	644.067
miR-106b	492.001	385.755	0.784054	446.251	545.376	111.713	189.388	0.00380141	0.0820387	0.715602	0.997856	351.411	67.9778	222.92	209.375	941.116	586.656	744.301	453.714	81.9436	382.394	30.7944	1069.56	1253.85
miR-3432a-2-5p;miR-3432a-1-5p	487.645	133.776	0.274331	539.105	427.609	54.6147	35.8742	-0.0150775	0.0822792	0.380514	0.997856	548.223	710.935	665.705	638.129	249.584	476.057	485.107	589.183	362.893	501.159	388.729	346.598	377.091
miR-30c	436.486	243.021	0.556767	383.828	497.921	35.8303	135.688	0.0101507	0.0822859	0.475293	0.997856	488.467	177.026	366.443	442.331	451.757	400.721	360.048	830.733	1030.15	242.325	103.581	278.994	501.749
miR-2285bo-5p	419.605	110.308	0.262884	462.547	369.506	35.0966	44.0508	-0.0154446	0.0823848	0.37992	0.997856	462.152	522.58	445.839	528.796	531.864	498.497	248.1	310.36	163.887	437.782	405.126	500.978	398.906
miR-92a	416.203	408.385	0.981215	494.766	324.547	199.621	58.1997	-0.00469238	0.0820641	0.555641	0.997856	211.066	357.592	451.946	291.553	180.921	1769.58	200.699	215.03	386.305	208.772	599.09	194.236	343.848
miR-11980-5p	415.701	310.661	0.747318	379.881	457.49	88.0034	154.172	0.00495414	0.0822509	0.444325	0.997856	112.934	696.773	293.154	590.251	56.1291	596.273	313.655	213.597	292.656	346.711	1297.36	302.706	291.908
miR-27b	406.604	122.331	0.300861	399.321	415.101	30.4352	64.1939	0.00329337	0.0807456	0.849111	0.997856	407.33	524.704	409.195	333.713	496.988	323.783	299.536	441.529	199.006	218.358	515.505	633.159	483.05
miR-660-5p	399.449	148.672	0.372193	448.045	342.755	53.9448	55.0093	-0.00698926	0.0814487	0.645237	0.997856	518.071	371.754	604.631	540.944	592.353	291.725	216.836	342.615	362.893	276.942	95.9824	473.23	504.865
miR-200a-3p	385.909	152.56	0.395327	415.559	351.318	46.4674	71.3823	-0.00930435	0.0824037	0.406918	0.997856	495.045	280.409	418.356	292.267	581.999	282.108	558.73	561.229	0	394.643	299.545	417.229	435.264
miR-146b	381.24	179.225	0.470111	332.379	438.244	45.0384	88.5028	0.00881395	0.0816077	0.60002	0.997856	546.578	252.793	262.617	285.121	400.533	163.494	415.518	232.233	702.373	322.744	255.953	775.431	340.732
miR-122-5p	375.075	151.841	0.404828	371.095	379.717	53.9062	66.0587	-0.00399565	0.0817273	0.663985	0.997856	428.71	605.428	522.181	319.422	169.477	274.093	278.356	353.366	327.774	492.638	627.485	379.391	97.6488
cpo-mir-203-3p;cfa-mir-203-3p;cja-mir-203-3p	374.987	254.573	0.678885	412.995	330.644	87.1069	111.653	-0.00246394	0.0820353	0.731675	0.997856	235.736	409.991	299.262	232.242	951.47	418.353	343.911	136.186	0	373.34	159.171	825.882	489.283
miR-32-5p	374.23	117.913	0.31508	354.777	396.926	48.1085	41.3647	0.00991837	0.0813843	0.549985	0.997856	466.538	559.401	366.443	139.345	386.364	306.151	259.194	340.464	620.43	364.818	343.137	331.463	381.246
miR-3432a	360.53	121.615	0.337324	386.515	330.213	49.0617	42.1924	-0.0129677	0.0823062	0.379594	0.997856	475.857	374.586	571.04	498.784	230.511	190.743	364.082	545.46	292.656	361.623	274.75	268.904	237.889
miR-23a	330.362	131.171	0.397054	317.21	345.706	22.3345	73.9015	-0.00144617	0.0816909	0.868305	0.997856	290.558	332.1	195.436	295.84	377.645	371.869	357.022	466.615	0	233.803	422.323	547.393	404.1
miR-101-2-3p	321.43	225.841	0.702614	323.953	318.488	81.2346	97.1263	-0.000384233	0.0818287	0.955759	0.997856	336.061	150.118	262.617	160.783	828.858	246.844	282.391	184.209	35.1187	462.281	50.3908	620.042	558.884
miR-34c	316.777	121.654	0.384037	322.274	310.364	35.095	60.4583	-0.00534152	0.0815935	0.676766	0.997856	377.177	264.122	238.188	317.278	512.791	219.595	326.766	412.141	23.4124	453.227	218.76	353.661	400.983
let-7f-1-5p;let-7f-2-5p	315.474	176.824	0.560504	345.9	279.976	59.1193	78.3809	-0.0029688	0.0820208	0.689906	0.997856	152.406	308.733	311.477	247.248	363.477	694.049	343.911	183.492	0	554.417	131.576	454.058	356.314
let-7g	300.34	176.526	0.587752	260.452	346.877	53.3435	81.9104	0.00452261	0.0819424	0.68596	0.997856	169.401	188.355	116.04	114.334	372.741	511.32	350.971	237.25	11.7062	440.445	268.351	632.15	491.36
cgr-mir-1285-3p	297.628	133.991	0.450197	315.06	277.291	45.9711	58.9808	-0.000644916	0.081601	0.968911	0.997856	141.442	302.36	461.107	466.627	219.067	208.375	406.441	179.192	421.424	159.774	515.905	264.867	122.58
miR-10a-5p	295.894	142.754	0.482449	284.975	308.633	43.1109	69.1307	0.0089028	0.0819379	0.550049	0.997856	357.99	455.31	232.081	157.21	386.909	285.313	120.016	132.602	304.362	564.004	204.762	143.281	502.787
miR-19b-2-3p;miR-19b-3p	295.78	152.213	0.514616	250.264	348.881	49.4408	64.5494	0.0110971	0.0825086	0.445163	0.997856	357.441	43.1943	161.846	218.664	478.46	198.758	293.484	308.21	327.774	453.227	99.9817	288.075	616.019
miR-6120-3p	295.755	104.654	0.353854	302.441	287.954	38.5385	43.757	-0.00439888	0.0811222	0.750496	0.997856	334.416	211.015	320.638	493.781	362.932	214.787	179.52	177.041	316.068	288.659	504.308	223.498	218.152
miR-192-5p	294.231	139.189	0.473061	275.948	315.562	47.8531	61.1425	-0.000265456	0.0812958	0.974699	0.997856	444.609	75.0589	210.705	255.109	465.926	245.241	234.989	331.863	81.9436	366.416	165.57	521.663	425.915
let-7f	289.964	293.147	1.01098	316.803	258.653	140.654	61.6517	-0.000519839	0.081959	0.95345	0.997856	69.0761	99.1343	177.114	52.8796	283.37	1194.15	341.894	174.174	163.887	311.56	55.1899	318.345	528.758
miR-6529a	281.212	119.411	0.42463	287.82	273.502	51.7765	38.4944	0.00204411	0.0811067	0.89891	0.997856	214.903	325.727	244.295	324.424	95.9099	235.624	573.858	256.603	257.537	193.86	337.138	154.38	441.497
miR-1246	280.234	247.796	0.884248	283.547	276.368	64.2868	128.621	-0.000438697	0.0822797	0.836455	0.997856	217.096	519.039	546.611	153.637	62.6684	290.122	195.656	0	0	184.806	892.636	455.068	125.697
miR-2320-3p	270.245	119.622	0.442643	284.75	253.323	31.5863	60.9975	-0.00256176	0.0817985	0.755267	0.997856	257.665	232.966	415.302	322.995	136.236	274.093	353.997	150.521	0	263.095	477.512	288.075	340.732
let-7i-5p	269.669	72.0512	0.267184	263.619	276.726	27.4794	28.8349	0.00322781	0.0808618	0.834951	0.997856	225.868	357.592	253.456	231.527	312.797	335.003	129.093	222.198	199.006	335.526	317.542	380.4	205.686
miR-18a-5p	254.418	149.733	0.588532	233.639	278.661	49.9235	67.2447	0.00239384	0.0820789	0.791008	0.997856	276.853	29.7403	146.577	150.778	449.033	216.389	366.099	258.753	234.124	280.138	0	339.03	559.922
miR-2478-3p	252.877	198.443	0.784741	285.107	215.275	94.577	40.0983	0.00087448	0.081916	0.927947	0.997856	36.1827	312.273	229.027	195.083	129.696	865.558	227.93	128.301	245.831	117.701	396.327	143.785	259.704
miR-103-1-3p	251.738	92.9915	0.369399	226.141	281.6	20.4634	47.7147	0.0159364	0.0826715	0.407277	0.997856	287.817	226.593	198.49	142.918	186.915	227.61	312.647	316.094	152.181	357.362	153.972	230.056	479.933
miR-30c-5p	239.518	134.35	0.56092	234.681	245.161	25.0421	75.1973	0.00038945	0.0815289	0.973253	0.997856	261.502	158.615	232.081	137.201	319.881	214.787	318.698	556.211	58.5311	206.109	64.3882	163.966	421.76
miR-10161-3p	236.857	101.786	0.429738	254.239	216.577	37.6016	41.104	0.00800299	0.0813845	0.615497	0.997856	174.883	397.954	253.456	303.701	149.314	370.266	130.101	161.989	398.012	108.647	116.779	252.255	261.782
miR-93	233.895	113.472	0.485142	202.873	270.088	36.0765	49.7265	-0.0101045	0.0816678	0.511357	0.997856	339.35	76.4751	155.738	147.205	344.949	213.184	143.212	506.038	152.181	287.594	287.947	252.759	134.007
miR-182-5p	233.363	150.068	0.643066	245.389	219.333	29.6182	82.93	-0.00156398	0.08196	0.827318	0.997856	215.452	332.1	256.51	170.787	314.977	318.974	108.922	120.417	0	175.219	121.978	639.718	258.665
miR-26a-1-5p	227.807	84.1492	0.369389	209.11	249.619	23.8144	40.4705	0.0120119	0.082031	0.46475	0.997856	179.269	160.739	207.651	142.918	316.067	291.725	165.4	198.545	210.712	167.231	171.968	448.004	301.257
miR-125b-2-5p	217.885	107.333	0.492613	216.178	219.876	21.7131	59.3059	0.00337476	0.0816328	0.801039	0.997856	308.101	253.501	229.027	235.1	214.707	134.642	138.17	229.365	0	225.282	142.774	233.588	488.244
let-7d-5p	216.768	124.833	0.575882	217.195	216.27	57.1757	34.3167	-0.00045147	0.0814552	0.963971	0.997856	163.37	89.929	155.738	114.334	91.5504	453.616	451.825	195.677	140.475	308.365	139.974	159.929	353.198
miR-320a-2-3p	216.734	155.06	0.715438	209.053	225.696	42.9949	78.3674	0.00334832	0.0819667	0.735397	0.997856	133.766	109.048	271.779	235.1	25.6123	354.238	333.826	278.822	620.43	208.772	92.3831	69.6223	84.1442
miR-34c-5p;miR-34b-5p	211.507	103.139	0.48764	207.57	216.1	27.9414	52.6518	0.000466343	0.0819024	0.976283	0.997856	179.269	132.415	192.383	180.077	372.741	157.083	239.023	240.834	81.9436	339.787	3.59934	338.526	291.908
miR-23a-3p	206.189	93.084	0.45145	194.731	219.557	16.4079	52.0303	0.00776667	0.0818366	0.650293	0.997856	216.548	152.95	158.792	186.508	287.185	198.758	162.375	212.163	11.7062	146.993	265.551	246.705	434.226
miR-140	204.56	110.241	0.538917	205.908	202.988	36.2407	50.992	0.00827672	0.0821335	0.490239	0.997856	125.543	209.598	174.06	274.402	383.64	211.581	62.5293	149.804	128.768	121.429	65.9879	374.851	377.091
miR-148a	201.067	66.5841	0.331154	225.686	172.345	19.537	28.7418	-0.0087657	0.0815128	0.575802	0.997856	222.578	231.55	259.564	188.652	297.539	254.859	125.059	78.1276	105.356	142.199	193.964	274.453	239.967
miR-195-5p	196.568	75.8139	0.385687	179.852	216.07	19.35	38.0555	0.00116481	0.081423	0.931558	0.997856	136.508	160.031	250.403	253.679	178.741	174.714	104.888	260.903	93.6498	200.783	361.534	268.399	111.153
miR-2284z-4-5p;miR-2284aa-2-5p;miR-2284z-3-5p	196.177	73.6129	0.375236	202.341	188.987	29.0095	28.2021	-0.00551636	0.0816299	0.640079	0.997856	91.005	240.047	244.295	113.62	182.011	211.581	333.826	320.395	93.6498	201.848	183.966	190.705	143.357
gga-mir-6651-5p	195.251	175.852	0.900647	191.575	199.539	82.611	43.2701	-0.00163104	0.0817844	0.827985	0.997856	95.939	94.8857	103.826	129.341	52.8594	141.054	723.122	148.371	421.424	109.712	199.163	205.335	113.231
miR-107-3p;miR-103-1-3p;miR-103-2-3p	187.142	78.8318	0.42124	200.513	171.542	25.1326	36.1806	-0.00380523	0.0816796	0.735451	0.997856	161.178	172.777	122.148	237.958	202.719	341.414	165.4	189.943	0	129.95	197.964	236.11	275.287
miR-92a-1-3p	176.336	94.5094	0.535961	189.127	161.414	41.5874	28.3279	-0.00265502	0.0817298	0.762046	0.997856	107.452	272.619	143.524	163.641	110.623	423.162	102.871	237.967	58.5311	135.276	260.752	118.055	157.9
miR-200b-5p	175.745	82.0638	0.466948	186.29	163.442	28.1223	36.1744	-0.00783964	0.0819717	0.564984	0.997856	293.847	113.296	109.933	174.36	147.135	161.891	303.57	124.717	0	255.107	148.373	191.714	260.743
miR-150-5p	173.414	82.0973	0.473417	164.926	183.317	21.7885	41.9207	-0.00167458	0.0815395	0.867334	0.997856	161.178	230.133	143.524	107.903	100.814	142.657	268.271	367.702	234.124	142.732	59.1891	207.858	88.2995
miR-200a	168.577	77.7688	0.461325	174.876	161.228	29.4711	31.3862	-0.0077051	0.0821633	0.514845	0.997856	246.152	30.4484	116.04	135.772	266.477	208.375	220.87	201.412	0	172.556	149.972	233.588	209.841
miR-6529-5p	166.285	105.943	0.637116	173.865	157.441	41.2612	41.3712	-0.00137723	0.0819879	0.849721	0.997856	113.482	266.247	128.255	255.109	54.4943	46.4837	352.988	225.782	0	145.927	294.746	60.0366	218.152
miR-3432a-2-5p	166.039	110.891	0.667864	153.123	181.107	17.3133	62.9466	0.00983753	0.0823592	0.437649	0.997856	165.563	227.301	195.436	155.781	78.4717	120.216	129.093	183.492	515.074	135.276	107.58	77.6945	67.5231
pxy-mir-6497-5p	153.215	182.902	1.19376	186.982	113.821	88.5608	30.409	0.000553548	0.0820887	0.945577	0.997856	22.4771	252.793	82.4497	75.0319	31.0617	734.121	110.939	5.73414	234.124	127.287	86.3842	59.0276	170.366
miR-148a-3p	152.628	77.732	0.509291	167.194	135.635	27.915	32.1233	0.0028928	0.0811411	0.8565	0.997856	112.934	192.604	174.06	70.0298	207.078	307.754	105.896	81.7115	105.356	158.709	97.1822	70.6313	300.218
miR-320a	151.018	194.872	1.29039	166.002	133.538	84.6689	62.1382	0.00242503	0.0821714	0.708508	0.997856	27.9594	73.6427	152.685	120.766	14.7135	703.666	68.5806	117.55	468.249	84.6805	40.7925	49.4419	40.5139
miR-15a-5p	151.012	72.324	0.47893	147.982	154.546	23.2352	33.9145	0.00140764	0.081482	0.924625	0.997856	235.188	157.907	103.826	72.1736	194.545	70.5269	201.708	116.116	280.949	199.718	23.9956	103.929	202.569
miR-196a-2-5p;miR-196a-1-5p	148.098	118.477	0.799988	139.616	157.993	50.2526	40.0156	0.00595805	0.0823445	0.403209	0.997856	98.1319	460.975	85.5034	120.051	58.3089	54.4981	99.8452	106.798	0	143.797	171.968	324.904	200.492
miR-1249-3p	145.239	41.5457	0.286051	157.676	130.729	14.1778	16.868	-0.005707	0.0807734	0.72911	0.997856	103.614	208.182	122.148	152.208	145.5	160.288	211.793	159.122	58.5311	175.219	118.778	104.433	168.288
miR-375	143.104	125.767	0.87885	118.179	172.184	30.4348	64.7251	0.00597848	0.0823418	0.5216	0.997856	251.634	119.669	143.524	179.362	110.623	22.4404	0	60.9252	503.368	58.584	162.37	49.4419	198.414
miR-16b-3p	141.78	114.164	0.805217	110.527	178.242	19.3145	61.5404	0.00570995	0.0821502	0.572042	0.997856	148.02	19.8269	70.2349	127.197	179.831	83.35	145.229	246.568	456.543	68.1704	224.359	33.2976	40.5139
miR-191-3p	137.672	62.3545	0.452921	158.487	113.387	16.0041	29.5444	-0.00501104	0.0816259	0.69564	0.997856	162.822	247.128	140.47	163.641	147.679	153.877	93.794	147.654	0	126.754	61.1888	110.992	233.734
miR-6529-3p	135.611	37.4872	0.276431	143.118	126.854	11.3742	17.5395	-0.0114977	0.0817714	0.49478	0.997856	178.721	158.615	146.577	110.047	107.899	115.408	184.562	55.1911	187.3	127.287	127.177	165.479	98.6876
mmu-mir-5126-3p	134.611	88.306	0.65601	145.819	121.535	36.8604	30.2271	-0.0028032	0.0820049	0.715418	0.997856	66.335	233.674	109.933	130.055	16.8932	133.039	330.8	94.6133	222.418	61.7795	225.959	77.6945	46.7468
pal-mir-10001-5p	134.464	99.7086	0.741525	115.175	156.968	32.7777	44.3959	0.00984411	0.0826272	0.39802	0.997856	69.6243	94.1776	119.094	97.1842	14.7135	97.776	313.655	20.7862	199.006	74.5614	160.771	123.1	363.586
cja-mir-203-3p;mmu-mir-203-3p;rno-mir-203a-3p	134.075	98.1259	0.731873	146.38	119.719	37.124	39.2092	-0.00178575	0.0821457	0.7846	0.997856	179.269	80.7237	149.631	41.4462	329.145	213.184	31.2647	29.3875	152.181	111.31	0	297.661	127.775
miR-30e-3p	133.121	71.046	0.533694	137.55	127.954	18.0245	37.044	-0.000491462	0.081683	0.930244	0.997856	146.924	93.4695	109.933	105.759	207.623	208.375	90.7684	98.9139	0	133.145	51.1906	250.741	233.734
miR-125b-2-3p	131.352	65.6538	0.49983	143.366	117.336	23.3442	27.459	-0.00316599	0.0819619	0.675168	0.997856	75.6548	256.333	131.309	127.912	182.011	60.9096	169.434	114.683	0	169.361	99.1818	217.948	102.843
let-7b	129.457	141.148	1.09031	169.048	83.2677	67.8152	16.5635	-0.0080425	0.0825137	0.368866	0.997856	68.5279	206.058	64.1275	64.3131	18.528	580.244	181.537	70.2432	128.768	31.9549	57.5894	64.5772	146.473
miR-423-3p	129.234	113.873	0.881138	128.857	129.675	54.6153	24.9513	0.00113799	0.0820478	0.908292	0.997856	96.4872	0.708102	88.5571	98.6134	110.078	471.248	36.3074	98.9139	257.537	127.82	63.5883	102.415	127.775
miR-449a-3p	128.236	61.8353	0.482201	155.031	96.9737	9.05359	31.0915	-0.00454508	0.0822895	0.525968	0.997856	168.853	166.404	131.309	165.07	165.663	107.393	180.528	188.51	0	97.995	0	112.506	182.832
hsa-mir-5088-3p	126.134	105.215	0.834153	135.438	115.279	40.1722	42.0064	0.0021726	0.0821008	0.797093	0.997856	33.9898	174.901	219.866	84.3216	0	104.188	330.8	53.7575	327.774	48.4649	67.9875	36.8292	156.861
miR-24-3p	119.975	56.9031	0.474292	121.437	118.269	22.2637	22.2194	-0.00252351	0.0815484	0.828207	0.997856	115.127	44.6105	103.826	116.478	128.606	251.653	89.7599	141.203	11.7062	91.604	169.169	127.641	168.288
miR-183-5p	118.834	59.0045	0.496529	136.024	98.778	16.8833	27.2899	-0.00598481	0.0821889	0.491861	0.997856	135.959	174.193	164.899	85.7508	191.82	141.054	58.4952	94.6133	187.3	93.7344	13.9974	178.092	24.9316
miR-194-5p;miR-194-1-5p	118.697	71.3655	0.601242	135.012	99.6623	25.3049	29.2478	-0.00417327	0.0819684	0.67758	0.997856	84.9745	118.253	88.5571	69.3152	246.859	229.213	107.914	107.515	0	36.7481	74.3864	188.182	191.142
let-7d	114.98	188.942	1.64326	141.654	83.861	92.4451	30.9742	-0.00247482	0.0822514	0.670133	0.997856	27.4111	34.697	27.4832	7.1459	44.1404	735.724	114.973	111.816	11.7062	86.8108	1.19978	62.0547	229.579
miR-148b	114.672	49.5066	0.431725	116.104	113	13.0585	25.5359	-0.0026012	0.0814852	0.822274	0.997856	162.274	88.5128	100.772	95.0404	155.309	144.26	66.5635	111.099	0	74.0288	137.975	188.687	166.211
miR-2285av	114.629	76.1146	0.664006	133.487	92.6289	28.8292	28.4782	-0.0072311	0.0821414	0.548476	0.997856	166.112	55.9401	91.6108	124.339	120.432	301.342	74.6318	58.7749	0	96.9298	102.381	68.1088	229.579
miR-1	111.794	79.1493	0.707989	101.575	123.717	15.8968	43.2927	0.00891777	0.0825404	0.390846	0.997856	104.711	111.88	164.899	125.768	120.977	46.4837	36.3074	161.273	0	57.5188	32.794	180.11	310.606
miR-485-3p	106.547	74.7172	0.701263	114.71	97.0223	30.8727	26.2788	-0.00529474	0.0822252	0.516179	0.997856	209.969	208.89	21.3758	61.4547	191.82	9.61731	99.8452	161.989	199.006	62.312	37.5931	98.3793	22.854
miR-19a-3p	99.7666	69.528	0.696906	102.164	96.9694	23.7691	31.2131	-0.00131079	0.0819765	0.885469	0.997856	194.071	23.3674	39.698	66.4568	190.73	100.982	99.8452	113.249	0	159.774	3.59934	95.3523	209.841
ola-mir-1306-5p	98.6073	106.65	1.08156	128.239	64.0368	43.4328	34.2027	-0.00153008	0.0823277	0.410383	0.997856	46.5989	373.878	219.866	74.3173	80.1066	54.4981	48.4098	91.0294	0	27.1617	238.756	26.2345	1.03882
miR-7-3-3p	98.5764	46.6531	0.473268	93.0959	104.97	7.9338	26.2228	-0.00525131	0.0817935	0.607074	0.997856	98.6801	89.929	103.826	52.165	116.618	113.805	76.6489	53.7575	35.1187	129.95	145.173	214.921	50.902
miR-380-3p	98.3527	61.8432	0.62879	104.838	90.7864	20.6433	27.9883	-0.00757937	0.0822634	0.496875	0.997856	143.634	21.9512	97.7181	70.0298	122.067	73.7327	204.733	68.8096	0	85.2131	50.7907	221.48	118.425
mmu-mir-705-5p	96.1017	103.608	1.07811	99.5104	92.1248	35.8959	46.0184	0.00193862	0.0822418	0.753932	0.997856	4.38578	109.756	238.188	95.755	1.08989	14.426	232.972	12.185	257.537	39.9436	0	0	243.083
miR-495-3p	91.0099	64.7923	0.711925	107.241	72.0741	22.5168	26.7373	-0.00715229	0.0824129	0.445251	0.997856	162.822	100.551	94.6644	39.3024	164.028	12.8231	176.494	184.209	0	51.1278	21.1961	40.8653	135.046
miR-124a-1-3p;miR-124a-2-3p;miR-124b-3p	90.2723	60.7376	0.672826	84.0814	97.495	18.0374	29.5495	-0.00170589	0.0820609	0.774886	0.997856	77.8477	63.0211	76.3423	174.36	129.696	40.0721	27.2305	165.573	0	36.2155	208.762	108.974	65.4455
miR-19b	88.5496	50.4052	0.569231	88.0146	89.1737	16.8091	23.0819	-0.00384674	0.0818033	0.73109	0.997856	163.919	92.0533	36.6443	46.4483	140.595	76.9385	59.5037	101.064	0	176.285	110.78	37.8382	109.076
miR-135a	87.4862	59.0097	0.674503	71.6253	105.991	15.8043	28.4865	0.00292082	0.0822435	0.678502	0.997856	84.4263	0	79.396	19.2939	121.522	108.996	87.7428	47.3066	210.712	145.395	0	146.308	86.2218
hsa-mir-4508-5p	84.3724	76.8105	0.910375	84.7684	83.9103	22.4861	37.9767	-0.00412898	0.0822443	0.4772	0.997856	45.5025	82.1399	36.6443	88.6091	43.0505	222.801	74.6318	53.0408	0	54.3233	287.147	57.0096	51.9409
cpo-mir-203-3p	83.7065	74.5778	0.890944	94.1547	71.5169	25.0904	33.2505	-0.00407268	0.0822662	0.508638	0.997856	45.5025	61.6049	91.6108	42.1608	234.325	41.675	142.204	6.4509	0	56.9862	47.1913	243.678	74.7948
ggo-mir-4484-3p	80.0576	157.173	1.96325	43.8526	122.297	8.59137	90.9286	0.000498862	0.0822751	0.927149	0.997856	55.9187	46.0267	64.1275	13.5772	23.9775	80.1442	23.1964	63.0755	0	27.1617	618.287	6.55862	18.6987
miR-324-3p	79.4818	40.6369	0.511273	82.3128	76.1789	14.7006	17.2859	-0.00526291	0.0823739	0.388959	0.997856	95.939	0	91.6108	140.774	73.5673	86.5558	87.7428	81.7115	0	92.6692	133.975	99.8929	48.8244
miR-7-2-3p	78.1277	40.0413	0.512511	67.0811	91.0153	11.9534	18.2506	0.00772659	0.0820529	0.53462	0.997856	70.1725	44.6105	36.6443	76.4611	53.4044	137.848	50.4269	150.521	140.475	100.125	31.5942	43.3878	79.9889
miR-6119-5p	74.9733	79.0903	1.05491	62.7043	89.2872	20.029	40.6129	-0.000567954	0.0822674	0.867391	0.997856	134.863	0	76.3423	42.8754	138.96	44.8808	1.00854	289.574	0	127.82	0	56.0005	62.329
let-7e	72.8631	75.6068	1.03765	61.5226	86.0937	23.731	35.2639	0.00522704	0.0822939	0.544617	0.997856	36.7309	2.83241	21.3758	57.1672	17.9831	198.758	95.8111	28.6707	269.243	82.5501	5.59897	48.4329	82.0665
miR-184-3p	71.9093	50.8446	0.707065	73.9017	69.585	13.5423	26.1198	-0.00294447	0.0819583	0.737321	0.997856	65.2385	71.5184	54.9665	87.1799	35.4213	49.6894	153.298	52.324	199.006	30.3572	97.1822	28.2525	10.3882
miR-101-1-3p	71.577	69.2009	0.966804	67.3188	76.5449	26.8248	27.2438	0.000592941	0.0822066	0.940131	0.997856	112.386	0	27.4832	22.1523	219.612	24.0433	65.555	62.3587	0	71.8985	0	162.957	162.055
miR-328-3p	69.4722	50.0582	0.720549	67.3359	71.9647	12.7958	26.0787	0.00536872	0.082055	0.630832	0.997856	87.7157	117.545	36.6443	97.1842	25.0674	76.9385	30.2561	68.8096	0	21.3033	43.9919	103.424	194.259
miR-194-1-5p	67.9341	47.6346	0.701188	63.2115	73.4438	18.2522	18.8823	0.00107538	0.082176	0.875953	0.997856	25.7665	39.6537	64.1275	10.7188	167.842	84.9529	49.4183	153.388	58.5311	63.9098	0	99.3884	65.4455
cel-mir-255-5p	66.0848	42.2318	0.639054	59.0873	74.2486	14.343	18.5313	0.00520389	0.0822778	0.504734	0.997856	29.604	24.0755	128.255	50.7359	39.7808	35.2635	105.896	0.716767	105.356	74.0288	44.7918	145.803	74.7948
miR-660	65.951	46.7487	0.70884	69.9347	61.3033	15.6876	21.155	0.00325765	0.0822152	0.624774	0.997856	44.4061	149.41	82.4497	71.459	66.483	75.3356	0	121.134	0	25.5639	26.3952	54.487	140.24
miR-495	65.9001	48.7289	0.739437	77.1581	52.7658	19.8122	16.4255	-0.00581436	0.0824392	0.435974	0.997856	163.37	72.2265	30.5369	33.5857	125.882	9.61731	104.888	95.33	0	54.3233	0	98.3793	68.5619
miR-95-3p	65.7119	48.8849	0.743927	75.7351	54.0182	15.3897	22.3218	-0.00276482	0.0822066	0.715014	0.997856	133.218	0	61.0738	96.4696	75.747	112.202	51.4354	58.7749	0	47.9323	0.799853	52.469	164.133
miR-92b-5p	65.3182	41.9703	0.642551	78.2098	50.278	15.9688	14.7984	-0.00455435	0.0821834	0.550753	0.997856	32.8934	89.929	88.5571	68.6006	13.6236	102.585	151.281	5.01737	81.9436	25.5639	112.779	34.8112	41.5527
miR-24-1-5p	64.991	36.0524	0.554729	77.6561	50.2151	9.83175	16.4383	-0.0053628	0.0823096	0.482697	0.997856	60.8527	99.1343	39.698	63.5985	70.2976	84.9529	125.059	102.498	0	36.7481	0.799853	80.217	81.0277
miR-378-3p;miR-378-2-5p	63.1131	48.8355	0.773776	44.8701	84.3966	9.30885	24.5572	0.00116235	0.082231	0.872115	0.997856	43.3096	2.12431	42.7517	34.3003	65.3931	38.4692	87.7428	0	140.475	107.581	133.176	124.109	1.03882
dps-mir-2550-5p	61.6068	54.1383	0.878771	77.3961	43.1859	22.3653	16.5086	-0.00196185	0.0823028	0.692098	0.997856	36.7309	111.88	164.899	70.0298	0	16.0288	142.204	30.1042	0	48.4649	117.179	0	63.3678
miR-2284f-3p	61.5211	34.589	0.56223	60.302	62.9433	8.92303	17.9731	0.000926003	0.0818192	0.930222	0.997856	46.5989	98.4262	61.0738	30.0128	90.4605	40.0721	55.4696	50.8905	0	48.9975	148.373	68.1088	61.2902
cgr-mir-1260-5p	61.4046	36.7219	0.598031	61.8074	60.9347	12.4776	16.5825	0.00162886	0.0818739	0.875298	0.997856	40.0203	69.394	42.7517	52.8796	12.5337	112.202	102.871	65.2258	0	22.3684	99.5817	61.0456	117.386
miR-7857-2-3p	60.905	28.4881	0.467747	55.4812	67.2327	7.67401	14.1604	0.00776704	0.0823095	0.381721	0.997856	27.4111	73.6427	54.9665	73.6027	76.8369	57.7039	24.2049	72.3935	0	83.6153	62.7885	116.037	68.5619
mmu-mir-3077-5p	59.659	56.7437	0.951134	79.3482	36.6884	23.4635	15.8134	-0.000410541	0.0821351	0.943772	0.997856	0.548223	191.896	58.0201	65.7422	9.26402	117.011	112.956	20.0695	0	31.9549	24.3955	23.2074	120.503
miR-411-5p	59.4617	26.2938	0.442197	61.4269	57.1689	8.92621	11.8145	-0.00368647	0.081477	0.783711	0.997856	99.7766	36.1132	85.5034	35.0149	74.1122	56.101	43.3671	47.3066	0	68.703	86.3842	57.5141	83.1054
let-7f-2-5p	58.929	51.2115	0.869037	46.462	73.4739	11.2244	26.6476	0.00690686	0.0824473	0.456321	0.997856	44.4061	1.4162	51.9128	15.0064	50.1347	62.5125	99.8452	19.3527	0	113.44	27.195	92.8297	188.026
miR-196a-2-5p	58.7103	60.5697	1.03167	67.005	49.0332	27.9783	15.1778	0.00165192	0.0823002	0.571291	0.997856	14.2538	235.798	33.5906	102.186	35.9662	24.0433	23.1964	84.5785	0	107.581	45.5916	40.8653	15.5823
mmu-mir-3968-3p	58.3273	44.2254	0.758228	49.8124	68.2614	9.19868	23.6765	0.00155926	0.0820869	0.84692	0.997856	28.5076	4.24861	64.1275	63.5985	42.5055	80.1442	65.555	13.6186	0	40.4762	152.772	136.218	66.4843
egr-mir-10240-5p	57.8607	50.3427	0.870067	66.4471	47.8433	20.8578	17.0876	-0.00054368	0.0822543	0.724208	0.997856	36.1827	172.069	30.5369	122.195	18.528	16.0288	69.5891	72.3935	35.1187	39.411	0	126.632	13.5046
miR-212-3p	57.6557	55.4548	0.961827	46.1369	71.0944	9.51628	30.5179	0.0015329	0.0822264	0.808269	0.997856	82.2334	26.1998	27.4832	60.7401	31.6067	16.0288	78.6659	129.735	199.006	85.2131	0	12.6127	0
hsa-mir-1973-3p	55.3506	69.5983	1.25741	44.9265	67.5119	14.6868	37.5476	-0.00101608	0.0823306	0.498385	0.997856	48.7918	26.9079	134.362	49.3067	26.1572	12.8231	16.1366	68.0929	0	45.802	265.951	25.2255	0
miR-11986c-3p	55.3156	38.0894	0.688583	51.7498	59.4757	13.2386	16.733	0.00317872	0.0817224	0.819227	0.997856	135.959	41.0699	24.4295	48.5921	37.601	35.2635	39.333	74.5438	0	32.4875	40.7925	80.217	128.813
miR-885	54.5099	47.0236	0.862662	63.8392	43.6257	20.5281	13.7205	-0.00184879	0.0820531	0.772087	0.997856	47.6954	191.896	30.5369	48.5921	22.8876	33.6606	71.6062	53.7575	0	33.0201	103.181	13.6218	58.1738
miR-7857-2-5p	52.6134	53.992	1.0262	42.9425	63.8962	7.42816	30.6298	0.00617798	0.0823859	0.45571	0.997856	32.3452	36.1132	51.9128	42.1608	10.8989	46.4837	80.683	6.4509	0	29.292	201.163	17.6578	128.813
miR-18a-3p	52.1151	17.3047	0.332049	49.0125	55.7347	6.73052	6.51328	-0.000871592	0.0814485	0.927025	0.997856	56.467	78.5994	21.3758	64.3131	37.0561	36.8664	48.4098	47.3066	58.5311	66.5727	56.7896	78.199	27.0092
miR-3432a-2-3p	49.8823	47.5612	0.953468	35.8564	66.2459	10.8496	23.9532	0.00498649	0.0824014	0.486115	0.997856	82.2334	28.3241	24.4295	41.4462	69.7527	4.80865	0	93.1797	175.593	25.0313	0	24.721	78.9501
miR-146a-5p;miR-146b-5p	49.8303	29.6788	0.595598	61.7061	35.9751	4.71741	15.1119	-0.00413942	0.0821395	0.632653	0.997856	47.1472	49.5672	67.1812	70.0298	82.2863	67.3212	48.4098	6.4509	0	37.2807	1.99963	78.7035	91.4159
miR-7865	49.5997	43.3077	0.873145	61.3145	35.9323	21.0479	4.05902	-0.00255315	0.0821822	0.662875	0.997856	2.74111	123.21	67.1812	26.4398	5.99437	43.2779	160.357	27.9539	46.8249	30.3572	51.9905	25.2255	33.2421
let-7a-3-3p;let-7a-1-3p	49.3514	40.4019	0.818659	38.3703	62.1627	8.64607	20.9021	0.0055573	0.0824266	0.470908	0.997856	48.2436	0	76.3423	37.8733	55.0392	20.8375	30.2561	22.2198	93.6498	89.4737	0	22.1984	145.434
hiv1-mir-H1-5p	49.2032	42.2553	0.858792	67.5544	27.7934	17.1561	10.1129	-0.00270816	0.0821793	0.648107	0.997856	8.22334	130.291	109.933	70.0298	9.26402	43.2779	101.862	7.88444	11.7062	12.782	72.3867	11.0992	50.902
miR-106-5p	48.5961	37.347	0.768518	45.9994	51.6255	12.4591	17.0162	0.00233917	0.0821397	0.757463	0.997856	24.67	2.12431	39.698	60.0255	116.073	40.0721	39.333	32.2545	11.7062	54.8559	1.99963	118.56	90.3771
miR-130b-3p	47.8291	44.7431	0.935478	35.1199	62.6565	8.25418	23.7095	0.00170227	0.0822842	0.67377	0.997856	13.1573	27.616	39.698	80.7486	17.9831	19.2346	47.4013	88.8791	81.9436	27.1617	168.369	9.58568	0
miR-9-2-3p	47.112	17.3187	0.367606	46.6382	47.6648	7.24944	6.05668	-0.010742	0.0823977	0.415325	0.997856	78.3959	50.9834	30.5369	29.2982	67.5729	46.4837	23.1964	63.7923	58.5311	53.2582	54.79	33.8021	21.8152
miR-11988-3p	47.0217	36.4876	0.775974	44.8722	49.5294	9.60076	18.7978	0.00517987	0.0823441	0.479204	0.997856	14.2538	58.7725	61.0738	64.3131	8.17414	28.8519	78.6659	35.1216	140.475	53.7907	0	8.57666	59.2126
sme-mir-749-5p	46.9568	80.6863	1.71831	28.7239	68.2285	9.73274	45.6283	0.0045498	0.0824448	0.435577	0.997856	52.6294	0	45.8054	22.8669	4.35954	4.80865	70.5976	0	316.068	27.1617	38.393	27.748	0
miR-2285bs-5p;miR-2284z-4-5p;miR-2284aa-2-5p	46.7317	20.0436	0.428907	42.6089	51.5417	5.6431	9.72467	0.00111768	0.0817147	0.92937	0.997856	42.2132	41.0699	54.9665	12.148	49.0448	62.5125	36.3074	41.5725	93.6498	44.2043	66.7878	46.4149	16.6211
miR-449b-5p;miR-449a-5p	46.4736	25.4531	0.547689	44.2965	49.0137	7.62335	12.3633	-0.00264247	0.0817024	0.810143	0.997856	43.3096	22.6593	15.2685	61.4547	52.8594	36.8664	77.6574	40.8557	0	42.0739	103.181	54.9915	52.9797
miR-182	45.7073	34.5208	0.755259	44.0743	47.6123	9.13724	17.7643	-0.00214001	0.0822073	0.661121	0.997856	81.6852	38.2375	36.6443	21.4377	77.9268	38.4692	14.1195	80.2779	0	50.0627	0	122.091	33.2421
ssc-mir-10391-5p	45.3946	32.9938	0.726823	38.3918	53.5645	6.28762	17.8503	0.00372287	0.0823457	0.398925	0.997856	12.0609	61.6049	58.0201	22.8669	45.2302	33.6606	35.2988	35.8384	105.356	12.2494	115.979	51.9645	0
miR-340-3p	44.6185	46.4439	1.04091	42.4038	47.2023	14.0374	22.5535	0.00361095	0.0822566	0.623828	0.997856	29.604	118.961	27.4832	10.0043	20.7078	14.426	75.6403	67.3761	0	17.0426	0	39.8562	158.939
miR-11995-5p	43.7338	30.4737	0.6968	48.8359	37.7815	11.3079	12.2611	-0.000552426	0.0820599	0.925724	0.997856	13.7056	6.37292	97.7181	68.6006	43.5954	43.2779	68.5806	18.6359	0	30.3572	92.783	26.739	58.1738
hsa-mir-647-3p	43.4376	29.2237	0.672775	50.3032	35.4277	12.8748	7.93221	0.000549011	0.0821588	0.931298	0.997856	10.9645	53.8158	85.5034	105.045	3.26966	40.0721	53.4525	60.9252	35.1187	58.584	5.19905	25.73	27.0092
miR-211-5p;miR-204-5p	42.9817	17.3911	0.404617	44.5126	41.1957	7.24334	6.06788	-0.00833622	0.0819263	0.537033	0.997856	82.7817	41.0699	54.9665	50.7359	33.7864	24.0433	24.2049	47.3066	70.2373	25.5639	41.5924	30.2706	32.2033
miR-197-3p	42.5897	46.7116	1.09678	41.7101	43.6159	12.8362	23.7348	0.00123175	0.0821473	0.876632	0.997856	20.8325	15.5783	9.16108	57.1672	29.9718	43.2779	115.982	5.73414	0	46.8672	0	42.8833	166.211
hsa-mir-203b-3p	41.355	35.5053	0.858549	40.1077	42.8103	7.49179	19.4468	0.00451744	0.0819642	0.707819	0.997856	37.8274	36.8213	36.6443	14.2918	56.674	20.8375	77.6574	33.6881	0	26.6291	37.993	13.1172	145.434
miR-502a-2-3p;miR-502b-3p;miR-502a-1-3p	40.3722	29.777	0.737561	31.6154	50.5885	6.5468	15.1507	0.00433512	0.0820716	0.634496	0.997856	61.9492	36.8213	12.2148	45.0191	33.7864	22.4404	9.07684	22.9365	81.9436	42.0739	117.578	16.1443	22.854
miR-1388-5p	40.3119	63.0913	1.56508	35.2737	46.1897	7.53559	36.7345	0.00154373	0.0823022	0.7665	0.997856	31.2487	0	61.0738	42.8754	46.8651	14.426	50.4269	0	245.831	0.532582	0	30.7751	0
miR-2285aa-3p	40.0864	22.2708	0.555571	36.1408	44.6897	5.86864	11.2103	0.00130862	0.0818616	0.904834	0.997856	49.3401	15.5783	39.698	42.1608	49.0448	48.0865	9.07684	19.3527	0	58.0514	77.9857	69.1178	43.6303
miR-2285ci-3p	39.6246	50.9783	1.28653	29.2238	51.7588	9.68666	27.6615	0.00426129	0.0823286	0.558308	0.997856	83.8781	0	33.5906	28.5836	35.9662	6.41154	16.1366	9.31797	199.006	19.1729	0.399927	32.7931	49.8632
miR-19b-2-3p	39.2848	25.9965	0.661745	33.4814	46.0555	7.70738	12.2066	0.00518059	0.0821037	0.628538	0.997856	39.472	5.66482	18.3222	13.5772	50.6797	67.3212	39.333	46.5899	11.7062	42.0739	9.19831	86.7756	79.9889
let-7a-2-5p;let-7a-3-5p;let-7f-2-5p	37.8371	32.2035	0.851109	27.0539	50.4176	9.49216	14.2433	0.00486101	0.0823993	0.434816	0.997856	7.1269	0.708102	15.2685	17.1502	25.6123	80.1442	43.3671	69.5264	93.6498	82.0176	0	11.6037	45.708
efu-mir-9186f-2-5p	37.7703	64.477	1.70708	35.7965	40.073	21.739	29.2637	0.000390451	0.0823398	0.923428	0.997856	3.83756	36.1132	6.10738	0	0	32.0577	172.46	0	199.006	21.8358	19.5964	0	0
mml-mir-639-5p	37.6975	23.9311	0.634819	36.619	38.9558	9.52161	9.10591	0.00193886	0.0820485	0.812852	0.997856	18.6396	39.6537	45.8054	56.4526	7.08425	8.01442	80.683	75.2606	58.5311	23.9662	33.5938	7.06313	35.3198
miR-2284z-4-5p	37.2832	11.9891	0.321569	36.9223	37.7043	4.03474	5.44914	-0.00544002	0.0812309	0.715057	0.997856	55.9187	34.697	45.8054	25.7252	26.7022	27.249	42.3586	38.7054	11.7062	42.0739	51.5905	49.9464	32.2033
miR-2409-3p	36.4056	27.3956	0.752509	39.2024	33.1427	9.53816	11.9957	0.00241943	0.0821264	0.749018	0.997856	31.2487	84.9723	67.1812	29.2982	5.99437	22.4404	33.2817	63.0755	0	28.2268	27.5949	1.00902	78.9501
miR-29b-1-3p	36.2911	35.4384	0.976503	37.2961	35.1186	15.4768	11.2719	-0.000993992	0.0821956	0.846955	0.997856	41.1167	24.7836	30.5369	11.4334	20.1629	133.039	0	4.3006	0	26.6291	61.9886	74.1629	43.6303
hsa-mir-4443-5p	36.0378	33.3468	0.92533	48.6427	21.332	11.1669	12.841	-0.0015109	0.0823027	0.701145	0.997856	17.5431	74.3508	82.4497	73.6027	2.17977	28.8519	61.5208	0	0	3.19549	0	83.2441	41.5527
gga-mir-1565-5p	35.9259	36.3424	1.01159	46.4399	23.6595	13.2238	13.8693	-0.00518361	0.0823512	0.518243	0.997856	13.7056	37.5294	58.0201	20.7231	4.35954	100.982	89.7599	3.58384	11.7062	12.782	15.1972	0	98.6876
let-7f-1-5p	35.2244	25.0035	0.709835	35.0516	35.4261	12.0411	5.32928	-0.00312457	0.0819372	0.725308	0.997856	25.2183	16.2864	15.2685	22.1523	23.9775	112.202	30.2561	50.8905	11.7062	42.0739	46.3915	28.2525	33.2421
miR-2285e-2-5p	34.8624	25.7881	0.739712	37.2253	32.1056	8.70448	11.6046	0.00170028	0.0822514	0.742358	0.997856	15.8985	24.7836	70.2349	40.7316	51.2246	57.7039	0	69.5264	0	44.2043	0.399927	15.1353	63.3678
miR-19a	32.9182	24.4315	0.742188	31.8711	34.1398	9.63062	9.42564	-0.00412091	0.0823158	0.523788	0.997856	46.5989	0	12.2148	0.71459	65.9381	59.3067	38.3244	72.3935	0	31.4223	25.1954	52.9735	22.854
miR-151-5p;miR-28-5p	32.5377	23.0443	0.708235	37.1697	27.1337	8.90404	8.64955	0.00116736	0.082074	0.87063	0.997856	17.5431	64.4373	15.2685	58.5964	41.4156	60.9096	2.01708	10.0347	70.2373	9.05389	19.9963	35.8202	17.6599
ppy-mir-3940-5p	32.298	29.653	0.918106	40.9293	22.2282	11.3886	10.4691	-0.00232238	0.0822842	0.647363	0.997856	0	35.4051	30.5369	47.8775	30.5168	35.2635	106.905	0.716767	0	7.98872	66.7878	10.0902	47.7856
hsa-mir-3960-3p	31.5837	25.4656	0.806289	36.2209	26.1738	11.2548	7.26003	-0.00126614	0.082064	0.859976	0.997856	15.3502	12.7458	88.5571	32.1565	3.26966	28.8519	72.6147	6.4509	58.5311	23.4336	35.5935	7.06313	25.9704
ssa-mir-203a-1-3p;oni-mir-203a-2-3p;abu-mir-203-2-3p_mze-mir-203-2_stem-loop_nbr-mir-203-2_stem-loop_pny-mir-203-2_stem-loop	31.2931	28.6069	0.91416	19.0807	45.5409	6.36765	13.3227	0.00365032	0.0823891	0.440412	0.997856	0	0	9.16108	19.2939	51.2246	25.6462	28.2391	0	0	69.7682	63.9883	78.199	61.2902
miR-24-2-5p	31.2555	28.3701	0.907684	31.2631	31.2466	6.08697	15.4988	0.00438322	0.0819305	0.712473	0.997856	17.5431	31.1565	12.2148	27.1544	32.1516	32.0577	66.5635	11.4683	0	25.5639	15.9971	20.1804	114.27
miR-3431-5p	30.7575	16.3124	0.530355	30.8962	30.5957	5.16828	7.72817	-0.000709823	0.0816356	0.947753	0.997856	46.0507	10.6215	27.4832	17.1502	24.5224	48.0865	42.3586	53.0408	0	28.7594	21.996	24.721	55.0573
miR-12015-5p	30.6455	20.2463	0.66066	33.7166	27.0627	6.06619	9.69347	-0.000514511	0.081944	0.941801	0.997856	17.5431	32.5727	33.5906	58.5964	15.8033	22.4404	55.4696	14.3353	0	10.6516	69.9872	21.6939	45.708
hsa-mir-4285-3p	29.573	37.0345	1.25231	21.3016	39.2229	5.74318	20.5321	0.00659464	0.0825102	0.407048	0.997856	8.22334	14.162	48.8591	12.148	4.35954	24.0433	37.3159	10.7515	117.062	2.66291	0	2.01804	102.843
miR-195-3p	29.3376	17.5188	0.597147	34.3301	23.5129	4.69117	8.38887	0.000345015	0.0821905	0.960077	0.997856	11.5127	42.4861	45.8054	46.4483	41.4156	30.4548	22.1878	11.4683	0	47.3998	0	47.9284	34.281
hsa-mir-636-5p	29.2942	34.021	1.16136	39.3973	17.5073	15.5453	6.78489	-0.00540841	0.0824863	0.381871	0.997856	19.736	0	15.2685	24.296	10.8989	113.805	91.7769	35.8384	0	21.3033	0.799853	5.5496	41.5527
mmu-mir-5113-5p	29.2655	24.6893	0.843632	37.9628	19.1186	10.3623	6.4884	-0.00338081	0.0822813	0.564796	0.997856	6.03045	41.778	36.6443	49.3067	0.544943	41.675	89.7599	7.88444	0	3.72807	26.7951	36.8292	39.475
miR-11986-3p	29.0817	22.2353	0.764581	33.2856	24.1771	8.22244	8.89202	-0.000886595	0.0822294	0.828165	0.997856	6.57867	7.78913	58.0201	35.0149	18.528	65.7183	41.35	61.642	0	31.4223	0	15.6398	36.3586
eca-mir-8934-1-5p	28.7168	25.9919	0.905111	28.1143	29.4196	11.1779	8.58724	0.00305992	0.0823015	0.536391	0.997856	4.93401	54.5239	15.2685	10.7188	0	88.1587	23.1964	23.6533	58.5311	7.45614	53.1902	2.52255	31.1645
mmu-mir-7019-5p	28.6127	33.5283	1.1718	28.82	28.3708	6.82097	18.5094	0.00311522	0.0823013	0.590874	0.997856	4.93401	36.1132	51.9128	22.1523	2.17977	40.0721	44.3757	11.4683	128.768	15.4449	0	0	14.5434
miR-150	27.6876	30.0949	1.08695	22.8324	33.352	11.2099	12.0866	0.000347677	0.0821597	0.974079	0.997856	13.7056	6.37292	6.10738	13.5772	7.6292	17.6317	94.8025	44.4396	0	35.1504	0	87.2801	33.2421
miR-487b-3p	27.3878	29.7765	1.08722	29.9298	24.4221	12.1133	10.8506	-0.0012273	0.0822631	0.803289	0.997856	99.7766	0	0	20.0085	44.1404	30.4548	15.1281	0.716767	0	36.7481	0	70.6313	38.4362
mmu-mir-6238-3p	27.2263	50.7722	1.86482	33.8511	19.4973	23.8349	11.7955	-0.00042441	0.0823176	0.903717	0.997856	3.83756	0	12.2148	17.1502	1.08989	187.538	15.1281	0	81.9436	12.782	0	20.1804	2.07763
miR-196a	27.1713	33.7705	1.24287	23.9396	30.9417	7.8199	18.0054	0.00251458	0.0822544	0.71489	0.997856	37.8274	68.6859	9.16108	5.71672	15.8033	11.2202	19.1622	0	0	27.6942	0	33.2976	124.658
miR-361	26.4719	38.8565	1.46784	19.2279	34.9233	6.34164	21.6418	0.00486951	0.0824207	0.440933	0.997856	18.0914	0	30.5369	14.2918	1.63483	52.8952	17.1451	9.31797	152.181	17.0426	24.7955	1.00902	5.19409
ptr-mir-150-3p	26.1497	25.1897	0.963288	38.2941	11.9813	9.9762	5.61556	-0.00288153	0.0823653	0.367519	0.997856	2.74111	49.5672	85.5034	42.8754	7.08425	28.8519	51.4354	17.2024	0	0	39.1928	3.02706	12.4658
miR-6123	25.986	21.5071	0.827642	32.1597	18.7832	8.35696	7.47779	-0.00377869	0.0822823	0.578379	0.997856	29.604	29.7403	9.16108	17.1502	28.882	83.35	27.2305	4.3006	0	25.0313	0	43.8923	39.475
miR-20b-5p	25.4295	18.3691	0.722353	30.5302	19.4787	7.3388	6.13021	-0.00502431	0.0823544	0.512846	0.997856	56.467	0	15.2685	35.0149	55.0392	17.6317	34.2903	1.43353	0	20.7707	19.9963	39.3517	35.3198
ppy-mir-1538-3p	25.3335	34.0005	1.34212	19.3257	32.3426	7.63919	17.9672	0.000727394	0.0823287	0.861298	0.997856	3.83756	0	51.9128	30.7274	1.63483	4.80865	42.3586	0	0	34.6178	18.7966	127.136	13.5046
miR-760-3p	24.9285	32.2849	1.2951	27.5414	21.88	14.3513	9.65307	0.000954372	0.0823496	0.674401	0.997856	0	0	36.6443	31.4419	10.8989	113.805	0	4.3006	70.2373	11.7168	30.3944	14.6308	0
miR-29c-3p	24.8563	25.7012	1.03399	22.0629	28.1152	5.73324	13.8024	-0.00271609	0.0823018	0.493433	0.997856	35.0863	29.0322	3.05369	17.8647	24.5224	44.8808	0	101.064	0	20.7707	10.798	27.748	8.31054
mse-mir-31-5p	24.709	32.0116	1.29554	23.3203	26.3291	7.37223	17.1831	0.00250128	0.0823561	0.511585	0.997856	1.64467	20.535	27.4832	22.1523	1.08989	64.1154	26.222	9.31797	117.062	0	31.5942	0	0
xla-mir-27b-3p	24.5837	7.93565	0.322802	25.3403	23.701	3.14722	3.00297	-0.00382804	0.0817292	0.703973	0.997856	19.736	20.535	33.5906	15.721	40.3258	19.2346	28.2391	27.2372	11.7062	30.3572	23.9956	32.2886	16.6211
miR-211	24.1563	30.7742	1.27396	15.7803	33.9282	4.53867	16.864	0.0036173	0.0823535	0.483427	0.997856	9.31979	0.708102	3.05369	27.869	9.80897	30.4548	29.2476	14.3353	105.356	5.8584	0.799853	76.1809	1.03882
miR-296-3p	24.0803	22.4341	0.931638	23.7232	24.4969	7.32705	10.422	0.000854479	0.0821688	0.913641	0.997856	31.7969	33.9889	12.2148	0.71459	0	28.8519	58.4952	30.821	0	7.98872	5.59897	26.739	75.8336
miR-7865-5p	23.9818	28.552	1.19057	28.697	18.4808	10.5	11.6169	0.000869148	0.0822416	0.857904	0.997856	0	53.1077	58.0201	15.721	5.44943	0	68.5806	4.3006	81.9436	5.8584	2.39956	8.07215	8.31054
cja-mir-499a-3p	23.6243	21.0711	0.891926	26.0286	20.8193	7.89484	8.54747	-0.00278616	0.0822469	0.605657	0.997856	10.4162	22.6593	24.4295	20.0085	3.8146	27.249	73.6233	35.1216	58.5311	23.4336	3.19941	1.51353	3.11645
miR-2367-3p	23.6038	30.0385	1.27262	20.4988	27.2261	8.92117	14.6098	0.00106648	0.0823603	0.606072	0.997856	9.86801	75.0589	9.16108	19.2939	25.0674	0	5.04269	0	0	19.1729	101.181	38.8472	4.15527
miR-329b-3p	23.5848	33.1209	1.40433	13.3818	35.4883	4.98416	17.8456	0.00321689	0.0824021	0.475925	0.997856	29.0558	0	9.16108	29.2982	26.1572	0	0	25.8036	128.768	35.1504	0	23.2074	0
tgu-mir-1669-3p	23.4313	24.3795	1.04047	33.9073	11.2094	10.6914	3.57922	-0.00314641	0.0823527	0.426872	0.997856	4.93401	53.8158	70.2349	32.1565	7.6292	0	68.5806	0	23.4124	13.8471	20.7962	5.04509	4.15527
ipu-mir-27d-3p	23.2561	18.99	0.816559	23.8755	22.5334	6.13741	8.87647	-0.00192159	0.0822088	0.757442	0.997856	50.9847	0	21.3758	25.7252	24.5224	38.4692	6.05123	0.716767	0	38.8785	9.59824	60.0366	25.9704
miR-767-5p	23.1095	22.9829	0.994521	25.5432	20.2702	10.5528	6.05566	-0.00270669	0.0822538	0.692304	0.997856	53.1776	0	9.16108	16.4356	8.71908	9.61731	81.6916	23.6533	0	32.4875	36.3933	0	29.0869
miR-2889-3p	23.0183	33.4642	1.45381	21.6767	24.5834	7.50381	18.0829	0.00172278	0.0823172	0.700478	0.997856	0	1.4162	45.8054	39.3024	0	20.8375	44.3757	0	0	6.92356	17.9967	0	122.58
miR-2285bs-5p	22.7017	21.8074	0.960606	16.3963	30.0579	5.25801	10.8328	-0.00183915	0.0822757	0.570826	0.997856	3.83756	6.37292	12.2148	10.0043	13.0786	48.0865	21.1793	55.1911	11.7062	34.0852	3.59934	72.6494	3.11645
miR-190b	22.3992	28.697	1.28116	11.2377	35.421	3.61742	15.0693	0.000155692	0.0823703	0.973537	0.997856	1.64467	2.12431	27.4832	17.1502	17.4382	12.8231	0	35.1216	0	26.6291	40.7925	109.983	0
miR-1-2-3p;miR-1-1-3p	22.3635	15.4796	0.692182	21.6203	23.2306	5.07963	7.15374	-0.00141269	0.0820548	0.845998	0.997856	18.6396	1.4162	18.3222	33.5857	20.1629	12.8231	46.3927	24.3701	0	27.6942	54.79	6.55862	25.9704
miR-10172-5p	22.3321	21.5721	0.965969	18.1028	27.2663	6.23419	10.3735	0.00229856	0.082292	0.697464	0.997856	48.7918	26.1998	27.4832	5.71672	18.528	0	0	25.8036	0	16.51	65.188	0	56.0961
miR-7-3-5p;miR-7-1-5p;miR-7-2-5p	22.2497	23.0299	1.03507	22.7028	21.7211	8.97546	9.04373	0.000241236	0.0823224	0.969369	0.997856	7.67512	80.0156	15.2685	7.1459	13.6236	16.0288	19.1622	7.88444	0	24.4988	36.3933	61.5502	0
hsa-mir-10400-5p	22.2287	31.5538	1.41951	24.8902	19.1235	15.8667	3.7273	-0.000698494	0.0822711	0.852353	0.997856	6.57867	0	9.16108	17.1502	14.7135	126.628	0	11.4683	23.4124	14.3797	35.5935	8.07215	21.8152
miR-11972-5p	22.1672	18.1141	0.817158	22.8256	21.3991	7.99622	5.59255	0.0018855	0.0821839	0.742662	0.997856	10.4162	70.8102	3.05369	12.8626	10.3539	24.0433	28.2391	2.86707	35.1187	9.58647	35.5935	33.8021	11.427
hsa-mir-4327-5p	22.0342	22.643	1.02763	25.5234	17.9635	8.86214	8.55078	-0.00150401	0.0822219	0.811464	0.997856	6.03045	18.4107	42.7517	10.0043	0	28.8519	72.6147	15.0521	58.5311	2.66291	0.399927	1.00902	30.1257
miR-181c-5p	21.9087	17.292	0.789276	27.1935	15.7432	7.21376	5.03798	-0.00779691	0.0825723	0.387206	0.997856	62.4974	22.6593	9.16108	17.1502	29.9718	44.8808	4.03415	8.60121	0	29.292	25.9952	2.52255	28.0481
miR-122	21.6705	19.1999	0.885994	22.3021	20.9336	8.35776	6.15421	-0.00067581	0.0819528	0.942816	0.997856	72.9136	28.3241	15.2685	5.71672	5.99437	20.8375	7.05976	12.9018	0	17.0426	23.5957	22.1984	49.8632
miR-339-5p	19.9921	19.4161	0.971187	18.9537	21.2035	5.6187	9.62853	0.0011927	0.0821501	0.881686	0.997856	33.9898	2.12431	12.2148	44.3046	26.1572	4.80865	9.07684	58.7749	0	17.0426	1.59971	2.01804	47.7856
miR-127-3p	19.9759	27.88	1.39568	28.193	10.3893	12.831	5.30638	-0.00287227	0.0823576	0.563483	0.997856	33.9898	99.1343	6.10738	6.43131	50.6797	0	1.00854	0	0	6.39098	0	22.7029	33.2421
miR-2284k-5p	19.3508	19.6857	1.0173	13.6355	26.0187	2.12122	10.9569	0.00475923	0.0821981	0.551123	0.997856	24.67	14.8702	12.2148	15.721	13.0786	4.80865	10.0854	14.3353	11.7062	14.9123	85.9842	14.6308	14.5434
miR-500-3p	18.9945	20.9147	1.10109	24.0812	13.06	9.20372	5.63559	-0.00481065	0.0823778	0.516604	0.997856	43.8578	3.54051	30.5369	13.5772	5.44943	0	71.6062	2.1503	0	22.3684	6.79875	7.56764	39.475
miR-6524-3p	18.8752	14.8408	0.786259	21.4613	15.8581	6.06937	5.1553	0.00065424	0.0822876	0.856787	0.997856	2.74111	25.4917	45.8054	12.148	14.7135	43.2779	6.05123	21.503	0	0	24.7955	34.3066	14.5434
miR-184	18.5629	13.8845	0.747969	16.6503	20.7942	4.11629	6.70901	-0.00120524	0.0822548	0.734259	0.997856	14.802	22.6593	12.2148	38.5878	14.1685	0	14.1195	37.9887	0	44.2043	24.7955	13.6218	4.15527
mmu-mir-1941-5p	18.5606	18.7498	1.01019	20.4143	16.398	9.01841	3.84721	0.000356245	0.0823381	0.897896	0.997856	0	0	73.2886	18.5793	5.44943	30.4548	15.1281	22.9365	11.7062	6.92356	22.3959	30.2706	4.15527
ggo-mir-4484-3p;ppy-mir-4484-3p;hsa-mir-4484-3p	17.5428	45.1426	2.57328	7.68573	29.0428	3.20827	26.095	0.000199903	0.0823709	0.933842	0.997856	12.0609	0	21.3758	0.71459	0	17.6317	2.01708	0.716767	0	0.532582	171.968	0	1.03882
ggo-mir-4488-3p	17.2665	28.9509	1.67671	21.8381	11.9329	14.5263	2.57858	-0.00335837	0.0823704	0.478559	0.997856	10.4162	0	0	10.7188	9.26402	115.408	7.05976	10.7515	0	18.1078	15.9971	9.08117	17.6599
miR-339b	17.2276	19.5653	1.13569	21.7773	11.9197	7.94559	6.60174	-0.0012829	0.0823463	0.480316	0.997856	8.22334	67.2697	15.2685	32.8711	7.6292	0	21.1793	14.3353	0	3.72807	46.3915	7.06313	0
let-7a-1-5p	17.0725	17.2643	1.01123	14.3424	20.2577	6.14959	7.28134	-0.00321933	0.0823179	0.520556	0.997856	9.31979	1.4162	3.05369	2.85836	13.0786	19.2346	51.4354	53.7575	23.4124	26.6291	0	14.6308	3.11645
nve-mir-100-5p	16.8625	9.93121	0.588952	12.7967	21.6059	1.39984	5.0975	0.00490409	0.081985	0.620698	0.997856	20.8325	14.8702	12.2148	12.148	9.80897	9.61731	10.0854	16.4856	46.8249	21.8358	23.5957	13.6218	7.27172
miR-200c	16.7947	23.8291	1.41885	16.0014	17.7202	9.6616	8.81638	0.000918157	0.0823717	0.505942	0.997856	4.93401	78.5994	6.10738	5.00213	4.90448	6.41154	6.05123	47.3066	0	10.1191	48.3911	0.504509	0
miR-2389-3p	16.783	25.287	1.5067	16.5046	17.1079	12.313	4.95115	0.00147033	0.0822652	0.767811	0.997856	1.09645	2.12431	6.10738	3.57295	5.44943	96.1731	1.00854	23.6533	0	21.3033	3.19941	19.1714	35.3198
miR-194	16.7668	19.7017	1.17504	11.8286	22.528	4.88423	9.87036	-0.00109443	0.0823572	0.484151	0.997856	24.1218	0	27.4832	2.85836	28.337	0	0	57.3414	0	0.532582	24.7955	51.46	1.03882
miR-17-3p	16.6035	19.63	1.18228	16.8153	16.3564	6.03045	9.4674	-0.00288297	0.0823845	0.417628	0.997856	14.2538	0	9.16108	5.71672	32.1516	8.01442	48.4098	0	0	30.8897	0	62.0547	5.19409
pal-mir-9226-5p	16.5904	20.8748	1.25825	19.9779	12.6383	9.7727	4.74641	0.00155006	0.0823444	0.571857	0.997856	0	53.8158	15.2685	0	0	65.7183	5.04269	0	11.7062	5.8584	21.996	3.02706	33.2421
efu-mir-9270-5p	16.5609	17.7705	1.07304	22.4974	9.63486	8.03796	3.35388	-0.00149544	0.0822829	0.734418	0.997856	3.83756	30.4484	15.2685	22.8669	0	68.924	16.1366	0	0	11.7168	7.59861	15.6398	22.854
miR-29d-5p;miR-29c-5p	16.5561	26.7127	1.61346	13.4685	20.1584	3.68507	15.3355	0.000274145	0.0823087	0.951234	0.997856	21.9289	0	0	19.2939	14.7135	27.249	11.0939	0	0	18.1078	0	0	102.843
miR-193a-5p	16.5107	16.3063	0.987623	15.6507	17.514	6.50991	6.16637	5.60262e-06	0.0823101	0.962963	0.997856	8.77157	26.9079	6.10738	12.148	2.72471	52.8952	0	39.4222	0	24.4988	0	30.7751	10.3882
miR-2285dk-5p;miR-2285cx-5p;miR-2285ce-5p	16.3772	19.7162	1.20388	21.5114	10.3873	9.38943	3.04494	-0.000528153	0.0822033	0.908631	0.997856	9.31979	82.1399	12.2148	7.86049	14.7135	11.2202	13.111	19.3527	0	15.4449	0.399927	13.6218	13.5046
dpu-mir-285-5p	16.1847	20.7889	1.28448	13.9731	18.7649	5.32571	10.7424	-0.000674622	0.082363	0.603595	0.997856	35.0863	29.0322	24.4295	0	9.26402	0	0	43.006	0	3.19549	66.3878	0	0
eca-mir-9094-5p	16.0902	19.5305	1.21381	23.898	6.98117	8.78395	2.65318	-0.00297281	0.0823672	0.43766	0.997856	7.67512	25.4917	73.2886	20.7231	0	4.80865	35.2988	17.2024	0	2.66291	0	10.5947	11.427
gmo-mir-100b-5p	16.0635	6.32524	0.393765	15.1943	17.0776	2.03683	2.91246	-0.00113671	0.0818713	0.883757	0.997856	13.1573	14.162	12.2148	15.721	24.5224	6.41154	20.1708	17.2024	11.7062	20.7707	30.7944	11.6037	10.3882
isc-mir-3931-3p	15.3831	22.1085	1.4372	15.4452	15.3106	7.35026	10.1474	0.0041079	0.0823982	0.448499	0.997856	6.03045	61.6049	15.2685	8.57508	3.8146	12.8231	0	0	70.2373	3.19549	0	9.08117	9.34935
miR-2285cc-3p	15.3624	8.75619	0.569977	15.9462	14.6813	3.35166	3.50042	-0.00275699	0.0821117	0.73859	0.997856	26.3147	0	12.2148	23.5815	13.0786	11.2202	25.2134	24.3701	0	22.901	11.9978	9.08117	19.7375
miR-452-5p	15.2776	22.168	1.45102	19.6602	10.1644	9.69565	6.43534	-0.00203972	0.0823798	0.43769	0.997856	16.4467	0	27.4832	6.43131	8.71908	78.5414	0	9.31797	0	0	0	44.3968	7.27172
hsa-mir-203b-3p;ggo-mir-203b-3p;rno-mir-203b-3p	15.1688	15.8979	1.04807	19.5941	10.0059	6.75682	4.56913	-0.00289221	0.082354	0.586294	0.997856	45.5025	0	18.3222	2.85836	27.7921	41.675	1.00854	0	0	0	10.798	21.1894	28.0481
miR-7858-5p	14.9669	15.6445	1.04528	15.4517	14.4012	4.65198	7.66992	0.000829265	0.0822699	0.87874	0.997856	6.03045	0	27.4832	22.1523	8.17414	8.01442	36.3074	0	0	5.8584	0	33.8021	46.7468
miR-92b	14.9626	18.7937	1.25605	13.1507	17.0765	7.63003	6.84998	0.00159038	0.0823505	0.620473	0.997856	0	0	0	18.5793	14.1685	59.3067	0	17.2024	0	33.0201	0	7.56764	44.6691
spu-mir-375-3p	14.9534	13.1868	0.881858	14.4597	15.5294	5.05304	5.28562	-0.00332645	0.0823486	0.362146	0.997856	37.2792	31.8646	3.05369	10.7188	13.0786	3.20577	2.01708	17.9192	0	36.7481	14.7973	23.7119	0
miR-1-2-3p	14.7393	15.7493	1.06853	18.7907	10.0127	7.10887	3.72432	-0.000603372	0.0821228	0.925438	0.997856	3.28934	7.78913	18.3222	62.1693	4.35954	14.426	21.1793	14.3353	0	5.32582	4.79912	7.56764	28.0481
ipu-mir-203c-3p	14.4914	17.4051	1.20106	13.7556	15.3497	5.13598	8.5593	0.00316052	0.0823152	0.583761	0.997856	2.74111	0.708102	27.4832	3.57295	39.2359	6.41154	16.1366	0	0	13.3145	0.399927	19.1714	59.2126
miR-1307-3p	14.3964	22.3471	1.55227	12.1517	17.0152	7.61393	9.96533	0.00138951	0.0823341	0.748087	0.997856	9.31979	0	0	16.4356	0	59.3067	0	0.716767	0	7.45614	26.3952	0	67.5231
miR-7857-5p	14.1738	11.5878	0.817552	13.7907	14.6209	3.77163	5.39123	-0.00121148	0.0822906	0.764326	0.997856	27.9594	0	24.4295	15.0064	14.7135	14.426	0	37.2719	0	0	24.3955	14.6308	11.427
miR-339-5p;miR-339b-5p	14.0994	10.8646	0.770572	16.5469	11.2439	4.41815	3.67865	-0.000958148	0.0821715	0.875121	0.997856	7.67512	0.708102	21.3758	35.0149	3.8146	24.0433	23.1964	8.60121	0	15.9774	0.799853	17.1533	24.9316
oni-mir-10926-5p	14.02	25.0103	1.78391	18.8345	8.40305	12.2453	3.46712	-0.00257781	0.0823618	0.510785	0.997856	6.03045	0.708102	12.2148	5.00213	7.08425	97.776	3.02561	13.6186	0	0.532582	0	20.6849	15.5823
miR-18a	13.9814	18.79	1.34392	7.13903	21.9642	3.23563	9.6706	0.00409494	0.0824632	0.392463	0.997856	18.6396	0	0	0	20.7078	9.61731	1.00854	35.1216	0	0.532582	0	33.8021	62.329
miR-12023-3p	13.7575	24.1183	1.7531	9.48963	18.7367	5.33395	12.7928	0.00141186	0.0823667	0.680236	0.997856	0	0	12.2148	12.8626	0	0	41.35	27.2372	0	0	0	0	85.183
miR-6526	13.7206	13.4921	0.983345	16.739	10.1991	5.57601	4.4246	-0.000729584	0.0823403	0.753387	0.997856	0	0.708102	15.2685	45.7337	22.3426	24.0433	9.07684	0	0	16.51	30.7944	4.54058	9.34935
mdo-mir-12321-5p	13.5124	12.3121	0.911175	12.3	14.9268	4.72591	4.87049	0.00305956	0.0822123	0.661079	0.997856	1.09645	14.162	9.16108	7.86049	9.26402	3.20577	41.35	3.58384	35.1187	4.79323	22.7958	3.53157	19.7375
hsa-mir-10527-5p	13.4333	15.2645	1.13632	10.0947	17.3284	3.06281	8.16559	-0.000718425	0.0822905	0.805857	0.997856	14.2538	0	6.10738	17.8647	4.35954	24.0433	4.03415	0	0	41.0088	49.191	8.57666	5.19409
miR-142-5p	13.4242	17.2492	1.28493	9.73893	17.7237	5.05458	8.18208	0.00350189	0.0823821	0.520721	0.997856	8.22334	0	3.05369	2.14377	40.3258	14.426	0	19.3527	0	10.1191	0	17.6578	59.2126
mmu-mir-6386-5p	13.1035	21.961	1.67597	12.0201	14.3674	3.93197	12.354	0.000226877	0.0823099	0.9582	0.997856	13.1573	28.3241	3.05369	8.57508	0	4.80865	26.222	0	81.9436	4.26065	0	0	0
mml-mir-1233-5p	12.8371	18.5374	1.44405	14.178	11.2728	5.91096	8.70494	0.000645414	0.0822976	0.865759	0.997856	0	37.5294	9.16108	3.57295	1.63483	8.01442	39.333	0.716767	58.5311	7.98872	0.399927	0	0
mmu-mir-6236-3p	12.7861	17.9292	1.40224	10.7893	15.1156	2.70024	10.2214	0.00369913	0.082383	0.447193	0.997856	0	1.4162	18.3222	8.57508	13.6236	14.426	19.1622	0	70.2373	6.39098	1.59971	0	12.4658
miR-11986b-3p	12.7826	16.7448	1.30997	8.92539	17.2827	2.72135	9.21433	0.00131803	0.0822795	0.801483	0.997856	23.5736	9.20533	9.16108	11.4334	1.08989	8.01442	0	0	0	19.1729	65.588	9.58568	9.34935
miR-135a-2-3p	12.6031	16.5246	1.31116	17.7248	6.6277	7.6627	2.76306	-0.000562263	0.0823741	0.618609	0.997856	0	59.4806	18.3222	15.0064	0	0	31.2647	12.185	0	15.9774	0	11.6037	0
miR-2285i-5p	12.5452	6.3753	0.508186	9.61597	15.9626	1.43763	2.87214	0.00693132	0.0824106	0.388294	0.997856	12.6091	12.0377	15.2685	9.28967	9.26402	4.80865	4.03415	6.4509	23.4124	14.3797	17.9967	25.2255	8.31054
ssc-mir-1285-3p;cgr-mir-1285-3p	12.5315	16.1152	1.28598	10.8686	14.4716	3.35089	8.7939	-2.82054e-05	0.0823692	0.788484	0.997856	4.93401	22.6593	12.2148	22.1523	0	0	14.1195	17.9192	0	8.52131	60.3889	0	0
miR-2888-2-3p	12.2867	17.0149	1.38483	8.56353	16.6303	4.10906	8.70187	0.00282092	0.0823858	0.468832	0.997856	8.22334	0	33.5906	1.42918	7.08425	9.61731	0	1.43353	0	0	60.3889	16.1443	21.8152
cte-mir-125-5p	12.1264	7.28	0.600345	10.8236	13.6463	2.53575	3.10987	0.00134463	0.0820486	0.881807	0.997856	19.736	7.78913	6.10738	19.2939	8.71908	0	14.1195	10.0347	23.4124	23.4336	4.39919	6.05411	14.5434
mmu-mir-1668-5p	11.9465	21.371	1.78889	10.7945	13.2904	6.35481	10.4595	0.000887994	0.0823383	0.805572	0.997856	0	26.9079	0	0	3.26966	0	45.3842	0.716767	70.2373	7.98872	0.799853	0	0
eca-mir-9175-3p	11.8436	12.0139	1.01438	16.6991	6.17895	4.70995	3.46326	-0.000755623	0.08237	0.587773	0.997856	0	26.9079	33.5906	23.5815	0	9.61731	23.1964	0	0	0	12.7977	22.1984	2.07763
hsa-mir-6800-5p	11.6342	10.8899	0.936018	13.1494	9.86654	3.26615	5.22845	-0.000857333	0.0822497	0.879112	0.997856	24.67	16.9945	21.3758	14.2918	0	1.60288	13.111	0	0	2.66291	0.799853	29.7661	25.9704
miR-532	11.5625	13.6369	1.17941	14.6981	7.90417	6.12246	3.46276	-0.000631266	0.0823406	0.820421	0.997856	0	0	12.2148	5.71672	27.7921	48.0865	9.07684	0	0	10.1191	0	20.6849	16.6211
gga-mir-12268-5p	11.5214	10.6891	0.927764	15.7131	6.631	3.78705	3.78635	-0.000778367	0.0822808	0.878028	0.997856	2.19289	25.4917	24.4295	22.8669	0	12.8231	22.1878	0	0	14.3797	0	1.51353	23.8928
miR-378d-3p	11.3774	12.5192	1.10036	13.6666	8.70664	5.5697	3.48791	-0.000899204	0.0822422	0.847108	0.997856	4.93401	12.0377	3.05369	16.4356	7.08425	48.0865	4.03415	0	0	8.52131	23.5957	4.54058	15.5823
rno-mir-3557-5p	11.2175	12.3394	1.10002	14.7192	7.13213	5.50987	2.91468	0.000204738	0.0823347	0.935393	0.997856	0	38.9456	15.2685	0.71459	4.35954	33.6606	10.0854	13.6186	0	0	0	14.6308	14.5434
miR-2893-3p	11.1973	9.17128	0.819063	10.747	11.7226	2.30263	4.80331	0.0025409	0.0822972	0.547588	0.997856	1.64467	11.3296	9.16108	20.0085	4.35954	17.6317	11.0939	2.1503	35.1187	17.5752	8.39846	6.05411	1.03882
miR-29a	11.0445	11.5669	1.04729	12.8936	8.88727	5.20962	3.15162	-0.00381435	0.0824101	0.434261	0.997856	40.0203	0	6.10738	18.5793	22.3426	3.20577	0	0	0	13.8471	13.5975	20.6849	5.19409
miR-181c-3p	11.0287	10.3454	0.93804	13.0062	8.72152	2.92561	5.03496	-0.00180208	0.0822872	0.754665	0.997856	18.6396	0	12.2148	4.28754	14.7135	24.0433	17.1451	0	0	18.1078	0	2.01804	32.2033
ssc-mir-2366-1-3p_ssc-mir-2366-2_stem-loop	10.9038	16.9128	1.55108	9.4379	12.6141	4.33427	8.76457	0.000939831	0.0823458	0.783082	0.997856	0	0	6.10738	16.4356	7.6292	1.60288	34.2903	0	58.5311	0	0	17.1533	0
miR-12056	10.7692	13.043	1.21114	13.3791	7.72432	3.82432	6.21738	-0.00342259	0.082413	0.46462	0.997856	12.0609	7.78913	6.10738	13.5772	0	20.8375	33.2817	0	0	4.79323	0	0	41.5527
efu-mir-9328-3p	10.7684	16.0851	1.49373	14.315	6.63072	7.55792	3.22212	0.000804489	0.0823439	0.714963	0.997856	0	2.12431	61.0738	9.28967	0	17.6317	10.0854	0	0	4.26065	0.799853	20.1804	14.5434
hsa-mir-296-5p_mml-mir-296_stem-loop	10.6374	7.89624	0.742309	9.52979	11.9296	1.43065	4.38324	0.000919449	0.0820081	0.913797	0.997856	8.77157	8.49723	6.10738	15.0064	3.8146	14.426	10.0854	12.9018	35.1187	3.72807	5.9989	6.55862	7.27172
hsv2-miR-H10-3p	10.4925	15.2285	1.45138	15.8586	4.23201	7.01819	2.13813	-0.000195957	0.0823481	0.928479	0.997856	4.93401	46.7348	42.7517	8.57508	0	8.01442	0	0.716767	0	9.05389	1.99963	13.6218	0
let-7c-5p;let-7a-3-5p;let-7a-1-5p	10.4779	15.9462	1.52189	9.69464	11.3916	3.24482	8.78831	0.000788116	0.0822302	0.900949	0.997856	12.0609	26.9079	0	5.71672	10.3539	12.8231	0	7.16767	0	1.06516	0.399927	0.504509	59.2126
miR-1249	10.4648	12.3853	1.18352	13.0565	7.4412	5.76048	2.71981	-0.00123017	0.0823148	0.726277	0.997856	15.3502	47.4429	0	12.8626	12.5337	3.20577	0	19.3527	0	6.92356	0	11.0992	7.27172
pma-mir-4624-3p	10.4002	11.4804	1.10387	9.81934	11.0778	3.83251	5.24024	0.000840964	0.0823408	0.80661	0.997856	0	0	9.16108	13.5772	0	28.8519	17.1451	0	0	33.5526	0	11.0992	21.8152
mmu-mir-3473d-5p	10.1668	9.5715	0.941443	9.01265	11.5134	3.97603	3.31721	0.00149586	0.082359	0.514434	0.997856	0	0	18.3222	20.7231	0	24.0433	0	25.8036	0	10.6516	11.9978	5.04509	15.5823
bhv5-mir-B11-3p	10.1238	14.668	1.44886	16.157	3.08518	6.66449	1.37994	-0.00164282	0.0823165	0.622523	0.997856	2.19289	55.232	15.2685	1.42918	10.8989	24.0433	4.03415	0	0	9.58647	4.79912	1.00902	3.11645
gga-mir-1676-5p	10.076	19.8604	1.97107	15.1547	4.15072	9.46975	3.08376	-0.00367904	0.0823912	0.509114	0.997856	8.77157	75.767	12.2148	5.00213	2.72471	1.60288	0	0	0	3.72807	0.399927	0	20.7763
miR-6123-3p	10.0609	16.3813	1.62821	15.2065	4.05769	7.56146	2.81523	-0.00153041	0.0823756	0.428125	0.997856	9.31979	62.313	6.10738	13.5772	0	0	15.1281	0	0	0	18.7966	5.5496	0
miR-192-5p;miR-215-5p	10.0553	10.0487	0.999344	6.48414	14.2217	2.00959	5.05906	0.00249542	0.0822894	0.664442	0.997856	10.4162	1.4162	0	9.28967	11.4438	12.8231	0	32.9713	0	12.2494	0.399927	27.2435	12.4658
gga-mir-1587-5p	9.99313	11.6229	1.16309	13.1555	6.30364	4.63698	3.91203	-0.00042598	0.0822771	0.940994	0.997856	0.548223	33.9889	12.2148	14.2918	3.8146	0	27.2305	0	0	10.6516	1.19978	0	25.9704
hsa-mir-4313-3p	9.92865	18.8982	1.9034	7.56809	12.6826	3.36796	10.5442	0.00211425	0.0824001	0.442005	0.997856	0	20.535	18.3222	0	0	0	14.1195	0	70.2373	5.8584	0	0	0
oan-mir-1378-3p	9.81076	9.10096	0.927651	11.5673	7.7614	3.59744	3.31587	0.000410556	0.0822848	0.923126	0.997856	0.548223	15.5783	3.05369	20.0085	0	25.6462	16.1366	12.9018	0	10.6516	1.19978	0	21.8152
gga-mir-6619-5p	9.7815	20.4537	2.09106	15.8607	2.68914	9.94155	0.989175	-0.000382185	0.0823694	0.82058	0.997856	0	78.5994	0	5.71672	0	17.6317	9.07684	5.73414	0	5.32582	0	4.03608	1.03882
miR-10167-3p	9.75858	8.38505	0.859249	13.6375	5.23317	3.06874	2.49655	-0.0034184	0.0823851	0.399905	0.997856	10.9645	26.1998	21.3758	12.148	7.6292	0	17.1451	0	11.7062	0	15.5971	2.01804	2.07763
miR-19b-3p;miR-19a-3p	9.75022	14.5059	1.48775	4.65509	15.6945	2.97094	7.28247	-0.000971085	0.0823437	0.712699	0.997856	23.5736	0	3.05369	2.14377	3.8146	0	0	45.8731	0	16.51	0	31.7841	0
miR-2285i-3p	9.68493	11.8707	1.22569	12.9084	5.92419	5.36648	2.70348	-0.00015528	0.0823798	0.807203	0.997856	0	38.9456	6.10738	5.71672	29.9718	9.61731	0	11.4683	0	6.92356	0	17.1533	0
miR-2411-3p	9.58604	13.8673	1.44661	10.2086	8.8597	5.77514	4.88701	-0.000565259	0.0823881	0.367336	0.997856	0	0	21.3758	5.71672	1.08989	43.2779	0	0	0	7.45614	33.5938	12.1082	0
miR-2336-3p	9.47366	12.3406	1.30262	6.02473	13.4974	2.50712	6.43639	0.00291304	0.0823517	0.588813	0.997856	13.1573	0	0	11.4334	0.544943	16.0288	1.00854	45.1563	0	7.98872	0	7.06313	20.7763
miR-2285o-1-3p	9.44343	9.87562	1.04577	8.79495	10.2	3.55408	4.22473	0.00312745	0.082395	0.415133	0.997856	5.48223	17.7026	27.4832	7.1459	0.544943	3.20577	0	0	0	18.6404	0	18.6668	23.8928
miR-342	9.4315	12.8339	1.36075	11.4673	7.05646	6.23114	2.2101	-0.000989977	0.0823586	0.672477	0.997856	0	0	0	10.0043	20.1629	48.0865	2.01708	10.0347	0	14.9123	0	9.08117	8.31054
gga-mir-2127-3p	9.19712	9.71544	1.05636	8.15425	10.4138	3.33306	4.30186	0.00209095	0.082315	0.671068	0.997856	0	0	6.10738	17.1502	0	9.61731	24.2049	0.716767	11.7062	4.79323	13.5975	0.504509	31.1645
miR-2388-5p	9.10732	13.6754	1.50158	10.3967	7.60309	4.35574	6.4039	-0.00139849	0.0823249	0.772326	0.997856	0	22.6593	9.16108	2.14377	6.53931	0	32.2732	0	0	0	0	3.02706	42.5915
miR-30f	9.09221	22.5754	2.48294	12.5445	5.06457	11.1791	2.98647	-0.000490039	0.0823737	0.847923	0.997856	0	0	0	2.85836	0	84.9529	0	0	0	11.1842	0	0.504509	18.6987
miR-2435	9.02919	10.9528	1.21305	12.4221	5.07076	4.80856	2.64547	-0.00255848	0.0823894	0.511405	0.997856	34.538	0	24.4295	10.0043	17.9831	0	0	0	0	18.1078	0	5.04509	7.27172
miR-505-5p	8.79973	12.7169	1.44515	4.81098	13.4533	2.52545	6.55858	0.00236377	0.0823853	0.509143	0.997856	0	0	9.16108	0	0.544943	4.80865	19.1622	43.006	0	12.782	0	0	24.9316
ppy-mir-1238-5p	8.75305	24.6437	2.81544	2.84231	15.6489	1.37995	14.2125	0.000672007	0.082345	0.85854	0.997856	0	0	0	5.00213	0	4.80865	10.0854	0	0	0	0.399927	0	93.4935
miR-6524-5p	8.69816	15.7035	1.80539	4.45942	13.6434	2.35548	8.5982	0.00312386	0.082412	0.475531	0.997856	8.77157	0	0	2.85836	17.9831	1.60288	0	0	0	8.52131	0	14.1263	59.2126
miR-2285j-1-3p;miR-2285j-2-3p	8.65208	11.1499	1.28869	11.1408	5.74862	4.4571	3.9044	-0.00251673	0.0823739	0.573892	0.997856	12.6091	0	6.10738	0.71459	17.4382	4.80865	36.3074	0	0	8.52131	0	0	25.9704
fru-mir-219-2-3p_tni-mir-219-2_stem-loop	8.63679	12.0576	1.39607	9.7577	7.32907	4.97834	4.2705	-0.000255008	0.082392	0.462499	0.997856	0	0	18.3222	37.1587	0	12.8231	0	28.6707	0	3.19549	0	12.1082	0
miR-12058-3p	8.60719	8.96332	1.04138	8.36872	8.8854	2.50843	4.51926	0.000265877	0.0822933	0.966103	0.997856	18.0914	0	12.2148	5.00213	15.2584	8.01442	0	0	0	6.39098	0	29.2615	17.6599
cja-mir-203-3p	8.55158	6.46116	0.755551	8.82773	8.2294	2.40966	2.67204	-0.00021936	0.0822452	0.951305	0.997856	7.67512	4.24861	9.16108	3.57295	16.8932	19.2346	1.00854	0.716767	11.7062	18.1078	0	12.6127	6.2329
mmu-mir-707-3p	8.5356	18.8711	2.21086	5.9653	11.5343	4.06403	10.1653	0.000301718	0.0823948	0.593945	0.997856	0	0	30.5369	0	0	11.2202	0	0	0	0	67.1877	2.01804	0
miR-95	8.52199	11.5283	1.35277	7.92085	9.22333	3.91663	5.19239	-0.000692972	0.082363	0.567925	0.997856	2.74111	0	6.10738	1.42918	14.7135	30.4548	0	0.716767	11.7062	6.92356	35.9934	0	0
miR-130b	8.38653	17.5908	2.0975	5.0723	12.2531	2.36486	9.97501	-0.000478545	0.0823855	0.432629	0.997856	4.93401	0	0	16.4356	12.5337	1.60288	0	0	0	6.92356	0	66.5952	0
miR-199c-3p;miR-199b-3p;miR-199a-2-3p	8.36845	9.83529	1.17528	5.76058	11.411	2.08043	5.11614	-0.000136977	0.0823858	0.627244	0.997856	0	0	9.16108	15.0064	6.53931	9.61731	0	30.1042	0	25.5639	12.7977	0	0
ggo-mir-3605-5p	8.29646	10.7239	1.29259	9.20347	7.23828	3.91169	4.51168	-0.00168129	0.0823645	0.609227	0.997856	20.8325	26.9079	0	3.57295	0	0	13.111	0	11.7062	1.59774	0	0	30.1257
sko-mir-125a-5p	8.21217	10.2592	1.24927	7.53128	9.00653	2.6111	5.34154	0.000702865	0.0823142	0.879904	0.997856	10.9645	0	0	11.4334	5.44943	20.8375	4.03415	0	0	21.8358	0	0	32.2033
miR-2431-5p	8.11259	13.5663	1.67226	12.2152	3.32623	6.31789	2.24503	-0.00172107	0.0823742	0.506256	0.997856	15.8985	50.9834	9.16108	7.86049	0	1.60288	0	0	0	14.9123	0	5.04509	0
mmu-mir-7052-5p	8.10883	16.4056	2.02318	14.6028	0.532582	7.6275	0.486178	-0.00168465	0.0823994	0.405837	0.997856	0	16.9945	61.0738	0	0	8.01442	16.1366	0	0	3.19549	0	0	0
ggo-mir-4488-5p	8.0701	9.01801	1.11746	7.01229	9.30421	1.65999	5.01449	0.00163237	0.082306	0.715665	0.997856	1.09645	5.66482	9.16108	10.7188	0.544943	12.8231	9.07684	10.7515	0	1.06516	35.1935	0.504509	8.31054
ssc-mir-9853-1-5p_ssc-mir-9853-2_stem-loop	8.00475	9.7667	1.22011	7.50939	8.58268	3.07379	4.63491	-0.00100891	0.0823805	0.422262	0.997856	0	14.8702	0	4.28754	0	11.2202	22.1878	27.2372	0	2.66291	21.596	0	0
miR-2384-5p	7.95277	10.8711	1.36696	7.81865	8.10925	4.46133	3.94689	0.000351514	0.0823211	0.928757	0.997856	16.4467	0	0	5.00213	0	0	33.2817	0	0	10.6516	0.399927	10.5947	27.0092
miR-323b-3p	7.85467	12.1873	1.55161	5.39222	10.7275	1.87882	6.80273	0.00168808	0.0823418	0.705385	0.997856	11.5127	0	0	5.71672	10.8989	9.61731	0	0	0	0	45.1917	1.51353	17.6599
rno-mir-345-3p_mmu-mir-345_stem-loop	7.85377	10.0002	1.2733	7.37344	8.41416	2.95782	4.90996	-0.000883747	0.0823779	0.425938	0.997856	5.48223	0	18.3222	8.57508	0	19.2346	0	33.6881	0	4.79323	0.399927	11.6037	0
hsa-mir-6850-5p	7.84016	19.3457	2.46752	4.32052	11.9464	2.84274	10.9055	-0.0011205	0.0823859	0.515637	0.997856	0	0	3.05369	5.00213	0	0	22.1878	0	0	0	0	0	71.6784
cli-mir-9616-5p	7.80901	15.3872	1.97044	2.32847	14.203	1.84147	8.26008	0.00205359	0.0824103	0.468469	0.997856	0	0	0	0	2.17977	0	14.1195	0	46.8249	0	38.393	0	0
miR-493-5p	7.80735	10.3962	1.33159	9.13985	6.25276	4.14653	3.85731	0.000743093	0.0823617	0.698554	0.997856	0	0	18.3222	17.8647	27.7921	0	0	12.185	0	0	0.399927	0	24.9316
miR-424-3p	7.78082	18.2182	2.34142	11.3336	3.63586	8.72096	3.31907	-0.00199285	0.0824163	0.621933	0.997856	0	0	0	9.28967	2.72471	67.3212	0	0	0	0	0	0	21.8152
oan-mir-1386-5p	7.70437	7.12093	0.924271	8.93202	6.27212	2.16028	3.36513	-0.000571935	0.0823507	0.762848	0.997856	0	12.7458	6.10738	7.1459	4.35954	16.0288	16.1366	0	11.7062	3.72807	0	22.1984	0
gga-mir-6676-5p	7.69679	9.13981	1.18748	12.0309	2.64032	3.71712	1.85621	-0.000905058	0.0823547	0.663357	0.997856	0.548223	23.3674	12.2148	20.0085	0	24.0433	4.03415	0.716767	0	12.782	0.799853	0.504509	1.03882
miR-2285m-3-5p	7.69614	13.2623	1.72325	9.59172	5.48463	5.44791	4.64806	-0.000569045	0.0823907	0.389247	0.997856	0	0	9.16108	11.4334	3.26966	43.2779	0	0	0	30.8897	0	2.01804	0
pma-mir-30d-5p	7.68873	6.62494	0.861644	4.99948	10.8262	1.15228	3.31588	0.00206644	0.0821918	0.749639	0.997856	9.86801	4.95672	0	5.71672	7.6292	4.80865	2.01708	8.60121	11.7062	7.98872	27.9949	5.5496	3.11645
miR-3956-5p	7.6498	16.1275	2.10822	11.5216	3.13266	7.76561	2.35076	-0.000770886	0.0823787	0.530366	0.997856	3.83756	60.8968	0	0	3.8146	0	12.1025	15.7689	0	0	0	3.02706	0
miR-126-3p	7.61277	17.1839	2.25725	3.18714	12.776	2.13218	9.60166	0.00122654	0.0823878	0.504946	0.997856	15.8985	0	0	0	0	6.41154	0	0	0	12.2494	0	0	64.4067
pte-mir-100b-5p	7.60866	6.38663	0.83939	6.78999	8.56378	1.81396	3.15727	0.00173031	0.0822502	0.729119	0.997856	8.22334	14.8702	12.2148	2.14377	5.44943	1.60288	3.02561	8.60121	0	24.4988	7.59861	7.56764	3.11645
mmu-mir-7018-5p	7.60103	12.6228	1.66068	8.30431	6.78052	4.4935	5.46322	-0.00105379	0.082387	0.396818	0.997856	0	17.7026	0	7.1459	0	0	33.2817	36.5551	0	3.72807	0.399927	0	0
abu-mir-100-1-5p_mze-mir-100-1_stem-loop_nbr-mir-100-1_stem-loop_oni-mir-100-1_stem-loop_pny-mir-100-1_stem-loop	7.59858	8.95689	1.17876	8.4469	6.60888	4.023	2.5765	-0.0028135	0.0823589	0.457376	0.997856	32.8934	0	6.10738	12.148	4.35954	1.60288	2.01708	0	11.7062	12.782	0	14.1263	1.03882
miR-2284z-4-5p;miR-2284z-3-5p;miR-2284z-1-5p	7.54588	10.0019	1.32547	6.59754	8.65228	1.9812	5.51391	0.00258792	0.0823496	0.557322	0.997856	0	2.12431	0	12.8626	10.8989	11.2202	9.07684	0	0	11.7168	2.79949	0	37.3974
eca-mir-8929-1-3p_eca-mir-8929-2_stem-loop	7.50386	21.6612	2.88668	1.84911	14.1011	1.32442	12.3926	0.00215221	0.0824196	0.392066	0.997856	0	0	0	2.85836	0	0	10.0854	0	81.9436	2.66291	0	0	0
mmu-mir-1895-3p	7.41216	8.8064	1.1881	9.9964	4.39722	4.0408	1.72259	-0.00261663	0.0823749	0.386	0.997856	2.19289	0.708102	12.2148	26.4398	0	3.20577	25.2134	0.716767	11.7062	5.8584	0	7.06313	1.03882
miR-664-3p	7.38971	11.4777	1.5532	11.1639	2.98653	5.00808	2.72632	-0.00111308	0.0823893	0.384511	0.997856	6.57867	36.1132	0	0	9.80897	25.6462	0	17.9192	0	0	0	0	0
miR-30d-3p	7.3819	13.7081	1.85699	11.7348	2.30346	6.42516	1.91936	-0.00231011	0.0823963	0.423063	0.997856	8.77157	50.9834	0	1.42918	3.8146	0	17.1451	0	0	12.782	0	0	1.03882
miR-885-5p	7.35786	6.10582	0.829836	8.29931	6.2595	2.325	2.39406	-6.18141e-05	0.0822804	0.967285	0.997856	3.83756	12.0377	12.2148	20.0085	4.35954	1.60288	4.03415	16.4856	0	10.6516	6.79875	0.504509	3.11645
miR-502a-2-3p;miR-502a-1-3p	7.31861	12.698	1.73503	6.90721	7.79857	2.34304	7.11909	0.000266594	0.0823932	0.47284	0.997856	0	12.7458	15.2685	10.7188	0	9.61731	0	0	0	0	46.7914	0	0
gga-mir-1565-3p	7.27998	7.48502	1.02816	6.11678	8.63706	2.53893	3.29962	0.00160827	0.0823308	0.708575	0.997856	0	0	0	10.7188	2.72471	11.2202	18.1537	0	11.7062	3.19549	0	16.1443	20.7763
miR-302a-5p	7.26241	9.73214	1.34007	7.19975	7.33552	3.11733	4.57973	-0.00116737	0.0823742	0.495176	0.997856	15.3502	0	15.2685	0	0.544943	19.2346	0	0	0	13.8471	0.399927	29.7661	0
mdo-mir-135b-3p	7.26198	9.22478	1.27029	10.3115	3.7042	4.06063	2.09008	-0.00101111	0.0823402	0.742346	0.997856	7.67512	17.7026	30.5369	15.721	0.544943	0	0	0	11.7062	10.1191	0.399927	0	0
gga-mir-1584-5p	7.20061	12.8647	1.78661	4.5056	10.3448	2.78374	6.79387	0.00238124	0.0823733	0.580492	0.997856	0	0	3.05369	3.57295	2.72471	0	22.1878	0	0	6.92356	8.39846	0	46.7468
miR-374b-5p	7.13747	7.13853	1.00015	9.33832	4.56983	3.09273	1.82812	0.00171795	0.082333	0.528421	0.997856	0	23.3674	12.2148	2.85836	10.8989	16.0288	0	10.0347	0	2.13033	0.799853	3.02706	11.427
miR-1271-5p	7.12694	12.2174	1.71426	6.00623	8.43443	3.3186	6.19534	0.00022341	0.0823477	0.94853	0.997856	8.22334	0	0	0	8.17414	25.6462	0	0	0	9.05389	0	0	41.5527
hme-mir-6308-5p	7.11531	13.0664	1.83638	12.1108	1.28724	6.06492	1.03593	-0.000481727	0.0823814	0.818539	0.997856	0	41.778	6.10738	4.28754	0.544943	32.0577	0	0	0	6.92356	0.799853	0	0
pal-mir-200b-3p	7.10057	4.58429	0.645623	6.32249	8.00833	1.74763	1.78238	-0.00366433	0.0823369	0.373942	0.997856	4.93401	5.66482	3.05369	2.14377	4.90448	6.41154	17.1451	10.7515	11.7062	9.05389	11.9978	4.54058	0
miR-18b-5p;miR-18a-5p	7.01717	8.49985	1.21129	10.6047	2.83169	3.25794	2.49399	-0.00128737	0.0823837	0.357153	0.997856	2.74111	16.2864	24.4295	5.00213	6.53931	19.2346	0	16.4856	0	0	0	0.504509	0
miR-2285j-1-3p	7.01025	5.70257	0.813461	6.7243	7.34385	1.92273	2.58394	-0.000125509	0.0822689	0.953891	0.997856	4.93401	0.708102	15.2685	4.28754	13.6236	3.20577	5.04269	17.2024	0	9.05389	0	12.6127	5.19409
dre-mir-30a-5p	6.9911	3.84042	0.549329	6.76109	7.25945	0.778429	2.11634	-0.00156236	0.0821622	0.782755	0.997856	7.1269	3.54051	6.10738	9.28967	9.80897	6.41154	5.04269	1.43353	11.7062	5.8584	16.397	5.04509	3.11645
miR-2284x-5p;miR-2285bo-5p	6.98384	5.98169	0.856505	8.06893	5.71789	2.48826	1.99936	-0.00126923	0.0822057	0.800557	0.997856	4.93401	3.54051	12.2148	6.43131	4.90448	22.4404	2.01708	4.3006	0	15.9774	4.79912	4.03608	5.19409
miR-2284l-5p	6.78797	9.1077	1.34174	6.26009	7.40382	2.39359	4.69454	0.000901751	0.0823217	0.837757	0.997856	7.67512	0	18.3222	0	9.80897	8.01442	0	0	0	12.2494	0	1.00902	31.1645
miR-382-3p	6.74803	10.8165	1.60292	8.83506	4.31316	4.76314	3.08771	-0.000476598	0.0823581	0.846395	0.997856	10.4162	38.2375	6.10738	0	7.08425	0	0	0	0	0	0	20.6849	5.19409
miR-2419-3p	6.60737	10.863	1.64407	5.22341	8.222	2.74047	5.61993	0.00133458	0.0823305	0.763112	0.997856	1.64467	0	0	13.5772	2.17977	0	19.1622	7.16767	0	3.72807	0	0	38.4362
miR-429	6.59968	13.9257	2.11005	1.16773	12.937	1.08111	7.48374	2.14494e-06	0.0823904	0.89941	0.997856	0	0	0	0	8.17414	0	0	0	0	0	40.7925	36.8292	0
cja-mir-3940-5p	6.57003	11.6399	1.77166	10.5871	1.88339	5.48087	1.11338	-0.000713663	0.0823722	0.733796	0.997856	0	43.1943	12.2148	3.57295	0	0	15.1281	0	0	2.66291	7.59861	0	1.03882
miR-2285aw-3p	6.54429	14.5897	2.22938	10.413	2.03084	7.02249	1.8539	-0.000494213	0.0823875	0.647287	0.997856	2.19289	0	54.9665	4.28754	11.4438	0	0	12.185	0	0	0	0	0
gga-mir-7475-3p	6.53674	8.43901	1.29101	7.97311	4.86099	2.67883	3.88337	-0.0020684	0.0823685	0.607005	0.997856	9.86801	0.708102	15.2685	17.8647	0	0	12.1025	0	0	3.19549	0	0	25.9704
miR-2285di-3p	6.46046	15.5352	2.40466	3.98426	9.34935	2.93517	8.53475	-0.000383967	0.0823707	0.854422	0.997856	0	0	0	0	5.44943	22.4404	0	0	0	0	0	0	56.0961
ptr-mir-762-3p	6.41839	5.76236	0.897789	9.06211	3.33405	2.40503	1.08313	-0.00364324	0.0823477	0.473845	0.997856	4.93401	9.91343	18.3222	15.0064	0.544943	1.60288	13.111	0.716767	0	4.26065	2.79949	8.07215	4.15527
pma-mir-27b-3p	6.40217	5.92073	0.924801	8.14381	4.37024	2.42031	1.84596	-0.000802125	0.0823289	0.790396	0.997856	0	0	6.10738	9.28967	9.26402	19.2346	13.111	0	11.7062	8.52131	0.799853	0	5.19409
miR-6522	6.37669	9.39676	1.47361	2.73509	10.6252	1.30282	4.89782	-0.000746895	0.0823852	0.483336	0.997856	0	0	0	5.71672	9.80897	1.60288	2.01708	27.2372	0	10.1191	26.3952	0	0
miR-2285cr-1-3p	6.30485	11.1302	1.76535	2.66863	10.5471	1.16637	6.10845	-5.5625e-05	0.0823805	0.878345	0.997856	6.57867	0	6.10738	0	5.99437	0	0	33.6881	0	0	29.5946	0	0
miR-339b-3p	6.27691	10.5105	1.67448	9.28269	2.77018	4.67055	2.52882	-0.00312137	0.0824465	0.496534	0.997856	0	36.1132	0	10.0043	2.72471	0	16.1366	0	0	0	0	0	16.6211
miR-2285bl-3p	6.23796	16.705	2.67795	10.8014	0.913943	8.20826	0.539538	-0.00175784	0.0823764	0.582584	0.997856	3.28934	63.7292	0	0	2.17977	6.41154	0	0.716767	0	3.72807	0	0	1.03882
miR-28	6.15193	6.37192	1.03576	8.4158	3.51074	2.49355	2.0098	-0.00192196	0.0823476	0.659546	0.997856	10.9645	0	18.3222	15.0064	9.80897	4.80865	0	0	0	12.2494	0	0.504509	8.31054
bmo-mir-3226-3p	6.13294	9.00626	1.46851	4.52901	8.00419	2.75464	4.22832	0.000629119	0.0823031	0.890919	0.997856	0.548223	1.4162	0	0	0.544943	8.01442	21.1793	0	23.4124	1.59774	1.19978	0	21.8152
prv-mir-LLT11a-3p_prv-mir-LLT11b_stem-loop	6.114	7.62049	1.2464	7.02079	5.05608	2.66241	3.31298	-0.000413344	0.0823247	0.933687	0.997856	0	0	6.10738	5.71672	2.72471	14.426	20.1708	0	0	8.52131	0	0	21.8152
miR-15a-5p;miR-15b-5p	6.11141	2.60441	0.426154	6.57033	5.57601	0.850997	1.17258	0.000295069	0.0820262	0.976758	0.997856	6.57867	11.3296	6.10738	5.71672	5.99437	3.20577	7.05976	5.01737	0	6.92356	9.19831	5.04509	7.27172
ipu-mir-187-3p	6.09898	13.3265	2.18505	1.12293	11.9044	1.03963	7.22699	0.000211174	0.0823943	0.799464	0.997856	0	0	0	7.86049	0	0	0	0	0	0	45.1917	26.2345	0
hco-mir-5941-3p	6.09839	10.7408	1.76126	6.88112	5.1852	3.85301	4.60379	0.000436109	0.0823905	0.471284	0.997856	0.548223	29.0322	0	14.2918	1.08989	3.20577	0	0.716767	0	0	30.3944	0	0
cfa-mir-1343-3p	6.03499	10.101	1.67374	3.88618	8.54194	2.27593	5.27719	0.000243264	0.0823921	0.88153	0.997856	0	0	15.2685	0.71459	0	11.2202	0	0	0	0	33.5938	17.6578	0
miR-2285bc-3p;miR-2285cc-3p	6.02304	7.93289	1.31709	5.28732	6.88138	2.03095	4.10886	-0.00068838	0.0823884	0.42761	0.997856	0	0	6.10738	5.00213	13.0786	12.8231	0	0	0	5.32582	28.3948	7.56764	0
cja-mir-9942-3p	6.0179	6.49894	1.07994	6.3815	5.5937	2.25904	2.87231	-0.000883036	0.0823659	0.567918	0.997856	4.38578	0	12.2148	16.4356	0	9.61731	2.01708	2.1503	0	16.51	14.3974	0.504509	0
mmu-mir-7074-5p	5.96604	5.15521	0.864092	5.75962	6.20686	1.86174	2.20483	0.00214504	0.0823348	0.492582	0.997856	0.548223	5.66482	12.2148	13.5772	3.26966	0	5.04269	17.2024	0	6.39098	2.39956	6.05411	5.19409
miR-2397-3p	5.83846	10.084	1.72717	3.84694	8.16189	1.91907	5.4806	0.00188303	0.0823726	0.618963	0.997856	5.48223	0	15.2685	2.14377	0	0	4.03415	0	0	0	0	12.6127	36.3586
hsa-mir-10226-5p	5.7694	4.45273	0.771784	7.36356	3.90954	1.67439	1.50766	-0.00135592	0.0822662	0.751133	0.997856	2.19289	12.7458	6.10738	12.8626	0.544943	8.01442	9.07684	3.58384	0	1.59774	11.5979	2.52255	4.15527
gga-mir-1594-5p	5.72905	5.06846	0.884695	7.55334	3.60071	1.70207	1.98278	-0.000530173	0.0822896	0.882766	0.997856	2.19289	9.20533	15.2685	11.4334	2.72471	8.01442	4.03415	1.43353	0	0	13.9974	2.01804	4.15527
ssc-mir-4332-3p	5.70008	7.07461	1.24114	6.60069	4.64935	2.72074	2.76702	-0.000499883	0.082386	0.565868	0.997856	0	9.20533	3.05369	7.1459	4.35954	22.4404	0	0	0	0	16.7969	11.0992	0
tni-mir-125a-5p;ola-mir-125a-5p;fru-mir-125a-5p	5.62379	5.06906	0.901361	6.88021	4.15797	2.25998	1.28916	-0.000643737	0.0822276	0.896066	0.997856	5.48223	19.1188	0	8.57508	4.35954	9.61731	1.00854	2.1503	0	9.58647	5.9989	2.01804	5.19409
eca-mir-1892-3p	5.62066	8.48714	1.50999	7.42042	3.52093	4.01565	1.64262	-0.00224437	0.0823716	0.424391	0.997856	0	1.4162	15.2685	5.00213	0	0	30.2561	2.1503	11.7062	5.32582	0.399927	0.504509	1.03882
mdo-mir-204-5p	5.59899	10.2725	1.83472	3.6509	7.87176	2.58956	5.23261	-0.00138759	0.0823926	0.568731	0.997856	0	0	0	0	2.17977	3.20577	20.1708	0	0	34.6178	0	12.6127	0
hme-mir-92a-5p	5.56138	10.8739	1.95526	4.61504	6.66544	1.97292	6.08469	7.06746e-05	0.0823916	0.814811	0.997856	0	0	15.2685	3.57295	5.44943	8.01442	0	0	0	0	39.9927	0	0
miR-124a-1-3p	5.5552	5.98306	1.07702	3.60783	7.82712	0.80185	3.23325	0.00121837	0.0823413	0.650709	0.997856	1.64467	4.24861	6.10738	3.57295	3.26966	6.41154	0	22.2198	0	1.59774	9.99817	12.1082	1.03882
mmu-mir-6239-3p	5.52209	10.7775	1.95171	5.44713	5.60954	3.98647	4.50687	-0.000449992	0.0823679	0.872907	0.997856	7.67512	0	0	0	0	30.4548	0	0	0	0	0	3.53157	30.1257
tch-mir-1306-3p;pal-mir-1306-3p	5.51968	9.84608	1.78382	2.02317	9.59893	1.20293	5.2809	-5.33654e-05	0.0823885	0.759049	0.997856	0	0	0	9.28967	3.26966	1.60288	0	22.9365	0	2.66291	31.9941	0	0
eca-mir-8908c-2-3p	5.4869	11.8548	2.16056	3.33793	7.99403	1.545	6.74939	0.000177122	0.0823908	0.9464	0.997856	0	0	6.10738	10.7188	6.53931	0	0	0	0	2.66291	0.399927	44.9013	0
miR-30b-3p	5.47955	11.7875	2.15118	4.19427	6.97905	2.55556	6.37097	-0.000152639	0.0823879	0.637737	0.997856	0	0	12.2148	0	0	0	17.1451	0	0	0	0	41.8743	0
miR-11994-5p	5.4753	9.77069	1.7845	4.38021	6.7529	2.55552	5.00797	-3.11652e-05	0.0823902	0.835245	0.997856	0	0	12.2148	0	17.4382	0	1.00854	0	0	6.92356	33.5938	0	0
miR-2285ba-2-3p	5.45977	14.6526	2.68373	2.1261	9.34905	1.07347	8.4427	-3.20318e-05	0.082389	0.536339	0.997856	0	0	3.05369	0	3.8146	8.01442	0	0	0	0	55.5898	0.504509	0
miR-2285av-5p	5.38937	5.53493	1.02701	7.26727	3.19848	2.57105	0.761428	-0.00526662	0.0824561	0.384314	0.997856	6.57867	3.54051	0	5.71672	21.7977	11.2202	2.01708	1.43353	0	3.72807	4.79912	4.03608	5.19409
miR-6534	5.34415	9.33127	1.74607	4.05754	6.84519	2.97778	4.3216	-0.00134716	0.082381	0.625158	0.997856	23.0254	0	0	4.28754	1.08989	0	0	27.9539	0	0	0	13.1172	0
gga-mir-12217-3p	5.34049	7.35223	1.37669	7.96973	2.27305	3.32998	1.23065	-0.00254941	0.0823683	0.579643	0.997856	0.548223	20.535	3.05369	7.86049	0	1.60288	22.1878	0	0	3.72807	1.59971	0	8.31054
pbv-mir-34c-5p	5.28695	5.69688	1.07754	5.96826	4.49209	2.64856	1.40573	-0.00286006	0.0823715	0.493673	0.997856	2.19289	0	0	5.71672	20.1629	1.60288	12.1025	8.60121	0	5.8584	0.799853	8.57666	3.11645
miR-454-3p	5.27051	10.3766	1.96881	4.89082	5.71349	2.92163	5.21568	-0.000358671	0.0823881	0.664177	0.997856	21.3807	0	0	0	1.63483	11.2202	0	0	0	0	0	0	34.281
gga-mir-12241-3p	5.22949	7.48157	1.43065	8.28527	1.6644	3.22806	1.44759	-0.00105557	0.0823875	0.505772	0.997856	0	0	24.4295	11.4334	0	8.01442	14.1195	0	0	9.58647	0.399927	0	0
hsa-mir-8077-5p	5.21827	6.426	1.23144	6.97226	3.17195	2.78891	1.7403	-0.000507937	0.0823537	0.791347	0.997856	0	0.708102	21.3758	5.00213	0	9.61731	12.1025	0	11.7062	5.32582	1.99963	0	0
sme-mir-2152-5p	5.16846	8.02994	1.55364	3.53601	7.07298	1.99415	4.09257	-0.00119235	0.0823843	0.629983	0.997856	13.7056	0	0	1.42918	0	9.61731	0	20.0695	0	22.3684	0	0	0
miR-7857-1-3p	5.16134	10.9923	2.12974	2.51207	8.25215	1.44577	6.15072	-0.000212994	0.0823876	0.732532	0.997856	0	1.4162	0	10.7188	5.44943	0	0	41.5725	0	0.532582	6.39883	1.00902	0
miR-34a-5p	5.13201	10.1081	1.96962	3.82803	6.65333	1.82471	5.62566	0.000353728	0.0823453	0.900247	0.997856	0	0	0	7.1459	6.53931	0	13.111	0	0	0	0	2.52255	37.3974
rlcv-mir-rL1-5-5p	5.10497	10.944	2.14379	1.92411	8.81597	0.976986	6.13913	0.000559182	0.0823898	0.600475	0.997856	1.64467	0	6.10738	5.71672	0	0	0	0	0	5.8584	41.9923	5.04509	0
cqu-mir-100-5p	5.08521	5.59685	1.10061	4.81872	5.39611	1.41933	2.9223	-0.00179939	0.0822981	0.676883	0.997856	12.0609	4.24861	3.05369	7.86049	4.90448	1.60288	0	2.1503	0	20.7707	6.39883	2.01804	1.03882
mmu-mir-207-5p	5.07994	12.9424	2.54774	2.26312	8.36621	1.2371	7.42038	0.000629442	0.0823884	0.638478	0.997856	0.548223	0	9.16108	0	1.08989	0	5.04269	0	0	48.9975	1.19978	0	0
hsa-mir-320c-1-3p	5.03514	9.21175	1.82949	8.51405	0.9764	4.26416	0.891327	-0.000187705	0.0823921	0.843265	0.997856	0	0	24.4295	27.1544	0	8.01442	0	0	0	5.8584	0	0	0
miR-31-3p	5.02464	15.2158	3.02823	1.10441	9.59824	0.512934	8.76195	7.56273e-05	0.0823911	0.509071	0.997856	0	0	0	2.85836	3.26966	1.60288	0	0	0	0	57.5894	0	0
miR-11994-3p	4.97212	9.59778	1.93032	3.56414	6.61477	2.39222	4.96388	-2.86386e-05	0.0823933	0.738076	0.997856	0	0	0	17.8647	7.08425	0	0	0	0	6.39098	0	33.2976	0
gga-mir-1354-5p	4.96199	10.5386	2.12387	3.73358	6.39513	2.18667	5.74124	0.000314564	0.0823937	0.459643	0.997856	0	0.708102	9.16108	15.721	0.544943	0	0	0	0	0.532582	0	37.8382	0
efu-mir-9289-3p	4.90663	9.5444	1.94521	7.92509	1.38509	4.4915	1.26441	-0.00096322	0.0823848	0.967182	0.997856	0	0	33.5906	16.4356	5.44943	0	0	0	0	0	0	0	8.31054
miR-12008-3p	4.89237	8.44032	1.7252	7.79242	1.50898	3.86042	1.37751	-0.0013074	0.0823924	0.525112	0.997856	10.9645	28.3241	0	0	15.2584	0	0	0	0	9.05389	0	0	0
cel-mir-50-3p	4.88285	8.31466	1.70283	7.4704	1.86404	3.76056	1.70162	-0.000307782	0.0823886	0.848405	0.997856	0	17.7026	3.05369	4.28754	0	27.249	0	0	0	11.1842	0	0	0
eca-mir-9054-3p	4.8498	8.24156	1.69936	7.11959	2.20171	3.89511	1.30643	-0.000605066	0.0823933	0.489065	0.997856	0	0	15.2685	5.71672	0	28.8519	0	7.88444	0	5.32582	0	0	0
mmu-mir-30d-5p_rno-mir-30d_stem-loop	4.82147	7.77933	1.61348	7.12206	2.13745	3.74941	0.699506	0.000125689	0.0823734	0.851387	0.997856	0	29.7403	0	10.0043	7.08425	0	3.02561	3.58384	0	3.72807	3.99927	1.51353	0
miR-135a-2-5p	4.75522	6.04428	1.27108	2.57356	7.30049	0.964908	3.14962	0.00336149	0.0823687	0.556204	0.997856	6.57867	0	0	0.71459	4.90448	4.80865	1.00854	2.86707	23.4124	5.32582	0	9.08117	3.11645
miR-411c-5p	4.71503	6.32333	1.3411	3.69004	5.91086	2.279	2.63189	-0.00107938	0.0823592	0.732292	0.997856	17.5431	0	6.10738	0	2.17977	0	0	12.9018	0	6.92356	0	15.6398	0
hsa-mir-4769-5p	4.69969	8.33614	1.77376	5.00872	4.33917	3.66908	2.59429	-0.00151862	0.0823944	0.408194	0.997856	0	0	6.10738	0.71459	0	0	28.2391	0.716767	0	8.52131	16.7969	0	0
hsa-mir-7110-5p	4.66907	5.80791	1.24391	5.53175	3.66261	2.18162	2.32148	-0.00061337	0.0823849	0.582653	0.997856	0	0.708102	12.2148	15.0064	2.72471	0	8.0683	15.0521	0	6.92356	0	0	0
tch-mir-140-3p	4.64719	3.27495	0.704716	4.09076	5.29635	0.936202	1.59675	0.00356205	0.0822634	0.612375	0.997856	3.83756	1.4162	3.05369	4.28754	9.80897	3.20577	3.02561	0.716767	0	4.79323	6.79875	9.08117	10.3882
miR-148a-5p	4.6154	8.39036	1.8179	3.92535	5.42047	2.2187	4.30357	-0.000513876	0.0823843	0.649441	0.997856	0	0	9.16108	0	2.17977	0	16.1366	0	0	3.72807	28.7947	0	0
miR-7857-1-3p;miR-7857-2-3p	4.59663	6.91733	1.50487	3.06144	6.38768	1.66899	3.53478	-0.000457794	0.0823895	0.540518	0.997856	0	0	0	8.57508	1.63483	11.2202	0	0	0	5.8584	24.3955	8.07215	0
miR-346-5p	4.59032	7.7779	1.69441	4.51801	4.67468	1.63374	4.26738	-0.00148201	0.0823813	0.494517	0.997856	7.1269	0	9.16108	3.57295	0.544943	11.2202	0	0	0	0	0	0	28.0481
miR-16a-3p	4.58063	7.47813	1.63255	3.37357	5.98887	2.0019	3.7584	-0.000718476	0.0823637	0.756516	0.997856	15.8985	0	3.05369	3.57295	1.08989	0	0	0	0	11.7168	0	24.2165	0
cpo-mir-345-5p	4.57389	11.3709	2.48605	1.99028	7.5881	1.18861	6.47732	-0.000180606	0.0823912	0.670603	0.997856	0.548223	0	0	8.57508	0	4.80865	0	43.006	0	0	0	2.52255	0
miR-374a-5p	4.56527	5.4978	1.20427	5.56238	3.40197	2.30762	1.8022	-0.0042517	0.0824548	0.421458	0.997856	12.0609	0	0	0	2.72471	8.01442	16.1366	12.9018	0	3.72807	1.19978	0.504509	2.07763
miR-2305-5p	4.55753	9.38245	2.05867	3.87849	5.34975	2.88287	4.50359	-0.000820481	0.0823798	0.648731	0.997856	0.548223	0	0	2.14377	0	22.4404	2.01708	0	0	1.06516	29.9945	0	1.03882
miR-135b-5p	4.51807	7.71554	1.70771	4.36003	4.70244	2.83444	3.24824	-0.00140305	0.0823461	0.743712	0.997856	21.9289	0	0	0	2.17977	6.41154	0	0.716767	0	4.26065	0	22.1984	1.03882
miR-2285cj-5p;miR-2284y-1-3p	4.49711	9.19019	2.04358	3.21014	5.99857	1.45177	5.18968	0.00017104	0.0823926	0.85406	0.997856	0	0	9.16108	7.86049	5.44943	0	0	0	0	1.59774	34.3937	0	0
chi-mir-1306-3p	4.49413	9.0703	2.01826	7.81365	0.621345	4.26377	0.567208	0.000439287	0.0823943	0.366577	0.997856	0	29.0322	21.3758	4.28754	0	0	0	0	0	3.72807	0	0	0
sme-mir-125a-5p	4.47314	8.96944	2.00518	5.05071	3.7993	3.52183	3.46827	-0.000134426	0.0823868	0.893407	0.997856	3.83756	0	27.4832	0	0	0	4.03415	0	0	0	22.7958	0	0
tni-mir-204b-5p	4.40915	5.13163	1.16386	5.34457	3.31782	2.48997	0.837814	0.000195046	0.0822404	0.955291	0.997856	3.83756	3.54051	21.3758	2.85836	2.17977	1.60288	2.01708	5.01737	0	4.26065	5.9989	1.51353	3.11645
miR-653-5p	4.35499	4.88629	1.122	3.96812	4.80635	1.22183	2.55476	-0.00106043	0.0823664	0.59434	0.997856	4.93401	0	9.16108	5.71672	0.544943	6.41154	1.00854	13.6186	0	1.59774	0	13.6218	0
mmu-mir-6918-3p	4.33378	7.63811	1.76246	2.46875	6.50965	1.68299	3.96822	0.00152836	0.0823798	0.627179	0.997856	2.74111	0	0	1.42918	0	0	13.111	0	0	0	0	14.1263	24.9316
tca-let-7-5p	4.31855	7.01472	1.62432	4.22094	4.43244	2.15238	3.38516	-0.00108002	0.0823781	0.622256	0.997856	0	0	0	0	5.44943	16.0288	8.0683	2.1503	0	22.901	0	0.504509	1.03882
miR-2336	4.31363	7.37745	1.71027	4.9677	3.55054	2.56694	3.24119	-0.00110597	0.0823971	0.445749	0.997856	0	0	0	0	5.99437	9.61731	19.1622	0	0	21.3033	0	0	0
miR-338-5p	4.30746	7.04987	1.63666	4.61215	3.95199	1.89604	3.60766	-0.00104632	0.0823883	0.418344	0.997856	4.38578	0	3.05369	5.00213	3.8146	16.0288	0	0	0	0	0	23.7119	0
miR-376e	4.29242	7.10416	1.65505	2.04879	6.90999	0.970172	3.85008	-0.000827137	0.0823743	0.710317	0.997856	6.57867	0	0	2.85836	4.90448	0	0	26.5204	0	5.8584	0	9.08117	0
pma-mir-4624-5p	4.25763	7.71714	1.81254	5.75039	2.51608	3.41397	2.16863	0.000502236	0.0823857	0.468671	0.997856	0	0.708102	27.4832	5.71672	2.72471	1.60288	2.01708	0.716767	0	14.3797	0	0	0
ggo-mir-574-3p	4.24683	12.6799	2.98573	7.07367	0.948838	6.33117	0.366406	-0.00144749	0.0824039	0.442301	0.997856	0	0	0	1.42918	0	48.0865	0	2.1503	0	1.06516	0.399927	0	2.07763
mml-mir-939-5p	4.17744	11.4625	2.74391	1.64494	7.13203	1.31566	6.51062	-0.000371601	0.0823867	0.397882	0.997856	0	0	0	1.42918	0	0	10.0854	0	0	0	42.7922	0	0
gga-mir-12212-5p	4.17411	7.35228	1.7614	2.88555	5.67742	2.23605	3.4663	0.000820426	0.0823732	0.768367	0.997856	0	0	3.05369	0	0	0	17.1451	0	0	12.2494	0	0	21.8152
miR-2285ax-2-3p	4.15637	6.07402	1.46138	3.3388	5.1102	1.75109	2.97784	0.000181165	0.0823889	0.848815	0.997856	0	0	12.2148	1.42918	8.71908	0	1.00854	13.6186	0	17.0426	0	0	0
pma-mir-100b-5p	4.11544	4.35022	1.05705	4.33442	3.85997	1.81393	1.5281	0.000131974	0.0823162	0.949501	0.997856	2.74111	1.4162	15.2685	5.00213	4.90448	0	1.00854	4.3006	0	3.19549	11.5979	3.02706	1.03882
tgu-mir-2963-3p	4.09467	7.45862	1.82154	3.62836	4.63871	1.79688	3.95002	0.000163031	0.0823902	0.832165	0.997856	0	0.708102	12.2148	2.85836	0	9.61731	0	0	0	1.59774	0	26.2345	0
miR-1306-3p	4.08826	6.91652	1.6918	5.44218	2.50869	2.87597	2.29011	-0.000878137	0.0823883	0.538029	0.997856	1.64467	17.7026	0	0	0	1.60288	17.1451	15.0521	0	0	0	0	0
dre-mir-204-3-5p	4.08421	4.6507	1.1387	2.94213	5.41664	0.90198	2.48064	-5.76969e-05	0.0823221	0.866232	0.997856	3.28934	1.4162	0	7.86049	3.8146	3.20577	1.00854	15.7689	11.7062	1.59774	0.399927	3.02706	0
xla-mir-1306-3p	4.05835	6.71411	1.65439	2.43165	5.95617	1.45912	3.50228	0.000281297	0.0823953	0.398336	0.997856	0	0	9.16108	7.86049	0	0	0	15.0521	0	0	0	20.6849	0
miR-149-3p	4.03263	7.10377	1.76158	3.03364	5.19811	2.02906	3.49266	0.000241172	0.0823595	0.964831	0.997856	0	0	6.10738	0	0	0	15.1281	0	23.4124	0	0	0.504509	7.27172
ame-mir-125-5p	4.02626	2.42899	0.603287	4.21503	3.80603	0.77306	1.1411	-0.000942874	0.082241	0.855306	0.997856	3.83756	5.66482	6.10738	2.85836	5.99437	0	5.04269	4.3006	0	3.72807	9.19831	3.53157	2.07763
hsa-mir-151b-3p	4.00363	6.18266	1.54426	5.34913	2.43388	2.92662	1.17594	-0.00226516	0.0823571	0.618795	0.997856	10.9645	0	0	2.14377	0.544943	1.60288	22.1878	0.716767	0	1.06516	0	5.5496	7.27172
mmu-mir-5110-5p	4.00337	6.47462	1.61729	5.24858	2.55062	2.8702	1.80882	-0.00122089	0.0823834	0.502818	0.997856	7.1269	3.54051	0	22.8669	0	3.20577	0	0	0	3.19549	0	12.1082	0
hsa-mir-4433a-3p	3.99105	6.87724	1.72316	5.57169	2.14697	3.14443	1.60274	-0.00195077	0.0824009	0.422522	0.997856	20.2842	16.9945	0	0.71459	0	0	1.00854	10.7515	0	2.13033	0	0	0
hsa-mir-1290-3p	3.98627	3.47655	0.87213	3.28047	4.80971	0.646147	1.89378	0.00312999	0.0823609	0.43524	0.997856	1.64467	5.66482	6.10738	2.14377	2.17977	3.20577	2.01708	0.716767	11.7062	0.532582	10.798	3.02706	2.07763
miR-199b-3p	3.96039	3.68353	0.930094	3.01154	5.06738	0.979814	1.79268	0.004469	0.0823993	0.46995	0.997856	1.64467	0	0	3.57295	3.8146	8.01442	4.03415	4.3006	0	6.39098	5.19905	1.00902	13.5046
xtr-mir-130c-5p	3.92134	9.41004	2.3997	0.306253	8.13895	0.283535	5.13426	0.000467175	0.0823947	0.419532	0.997856	0	0	0	2.14377	0	0	0	0	0	0	33.1939	15.6398	0
eca-mir-8979-3p	3.86471	5.56417	1.43974	3.59125	4.18375	1.96647	2.42592	0.000489167	0.0823606	0.856592	0.997856	0	0	0	11.4334	0	1.60288	12.1025	0	0	0	11.5979	0	13.5046
miR-379-3p	3.85217	7.01133	1.8201	3.67259	4.06168	1.71225	3.70779	-0.000446125	0.082386	0.696407	0.997856	4.93401	0	12.2148	0	0.544943	8.01442	0	24.3701	0	0	0	0	0
miR-125b-1-3p	3.85099	5.38943	1.39949	3.60439	4.1387	2.0067	2.23209	0.00153329	0.0823617	0.566677	0.997856	0	0	0	10.0043	13.6236	1.60288	0	5.01737	0	3.72807	0	0.504509	15.5823
mmu-mir-5106-3p	3.83586	6.63576	1.72993	3.51857	4.20603	2.92739	2.048	0.000367817	0.0823531	0.879868	0.997856	1.64467	0	0	0	0.544943	22.4404	0	0	0	3.72807	13.1976	0	8.31054
asu-mir-100a-2-5p	3.83254	5.90527	1.54082	2.56963	5.30593	0.838913	3.31102	-0.00220272	0.0823666	0.520854	0.997856	6.57867	1.4162	0	2.14377	3.8146	0	4.03415	22.9365	0	3.19549	5.19905	0.504509	0
miR-450b-5p	3.81635	5.86822	1.53766	5.22552	2.1723	2.69766	1.30127	-0.000642587	0.0823945	0.431775	0.997856	0	0	0	10.0043	20.1629	6.41154	0	0	0	7.98872	0	5.04509	0
miR-3432a-1-5p	3.80657	4.99563	1.31237	4.00604	3.57385	1.64783	2.30203	-0.00187237	0.0823979	0.405843	0.997856	11.5127	0	0	9.28967	0	3.20577	4.03415	15.0521	0	6.39098	0	0	0
miR-7-1-5p	3.80265	7.1147	1.87098	5.15999	2.21909	3.13757	2.02574	-0.000423052	0.0823807	0.82546	0.997856	2.19289	0	24.4295	1.42918	0	0	8.0683	0	0	13.3145	0	0	0
dev-mir-D6-3p	3.79302	10.2208	2.69463	1.51484	6.4509	0.794055	5.88884	0.000250132	0.0823929	0.877383	0.997856	0.548223	0	6.10738	2.85836	1.08989	0	0	38.7054	0	0	0	0	0
bma-mir-750-5p	3.7892	8.54791	2.25586	5.60354	1.67246	4.08089	1.52674	-0.000201724	0.0823906	0.916831	0.997856	0	31.1565	0	0	0	0	8.0683	10.0347	0	0	0	0	0
gga-mir-1607-5p	3.77929	9.05332	2.39551	6.7333	0.332945	4.35918	0.238491	0.000371156	0.082394	0.443632	0.997856	0	31.8646	15.2685	0	0	0	0	0	0	1.59774	0.399927	0	0
cfa-mir-207-5p	3.74754	8.51669	2.27261	3.83073	3.65049	3.38138	3.25996	-0.000195352	0.0823954	0.629489	0.997856	0	0	0	25.7252	1.08989	0	0	21.503	0	0	0.399927	0	0
efu-mir-9271-5p	3.7439	3.34188	0.892619	4.9368	2.35219	1.4573	0.736759	-0.000823163	0.082278	0.884632	0.997856	0.548223	8.49723	9.16108	3.57295	1.08989	1.60288	10.0854	0.716767	0	2.66291	5.59897	2.01804	3.11645
miR-2285z-3p	3.74236	4.22325	1.1285	3.72039	3.76799	1.1579	2.1484	-0.000980517	0.0823734	0.590829	0.997856	1.09645	0	6.10738	0.71459	7.08425	8.01442	3.02561	0.716767	0	13.3145	0	8.57666	0
miR-2285cu-3p	3.74083	4.44021	1.18696	4.08202	3.34277	1.89527	1.4769	-0.00175824	0.0823953	0.376799	0.997856	9.31979	0	0	6.43131	0	12.8231	0	8.60121	0	7.45614	3.99927	0	0
miR-376e-3p	3.73921	5.88371	1.57352	3.04923	4.54418	2.05276	2.56221	-0.00118042	0.0823781	0.715329	0.997856	15.3502	0	0	0	5.99437	0	0	2.1503	0	17.0426	0	8.07215	0
miR-1388-3p	3.69201	6.59006	1.78495	2.99936	4.50012	1.69009	3.40479	0.000192487	0.0823928	0.700164	0.997856	0	0	12.2148	7.1459	1.63483	0	0	22.9365	0	0.532582	0	3.53157	0
cte-mir-2712-3p	3.68417	8.60521	2.33572	2.20097	5.41458	1.00763	4.94281	0.000357171	0.0823914	0.651113	0.997856	0	0.708102	6.10738	0	2.17977	6.41154	0	0	0	32.4875	0	0	0
miR-454-5p	3.66907	4.25761	1.1604	4.53291	2.66126	1.53621	1.73765	-0.000874977	0.0823309	0.867175	0.997856	4.93401	0	12.2148	2.14377	7.6292	4.80865	0	0	0	0	0	4.54058	11.427
mml-mir-615-5p	3.65232	6.7367	1.8445	3.22158	4.15484	1.69902	3.51868	0.00156449	0.0823584	0.746055	0.997856	0.548223	13.4539	0	0.71459	0	4.80865	3.02561	0.716767	23.4124	0	0.799853	0	0
miR-2285ax-2-3p;miR-2285ax-1-3p;miR-2285ax-3-3p	3.64504	5.96191	1.63562	4.61906	2.50869	2.29855	2.29011	-0.00141761	0.0823971	0.413032	0.997856	5.48223	0	9.16108	0	0.544943	0	17.1451	15.0521	0	0	0	0	0
miR-378-2-5p	3.6402	6.45049	1.77201	4.40179	2.75167	2.49475	2.51192	-0.000789279	0.0823834	0.689659	0.997856	16.9949	0	12.2148	0	0	1.60288	0	0	0	16.51	0	0	0
gga-mir-2954-5p	3.63843	4.60866	1.26666	4.19482	2.9893	1.85825	1.68506	-0.0020593	0.0823533	0.418788	0.997856	1.09645	2.12431	9.16108	0.71459	0.544943	1.60288	14.1195	0.716767	11.7062	0	3.99927	1.51353	0
miR-11984-3p	3.61891	6.34687	1.75381	3.37613	3.90215	1.66408	3.27911	0.0013136	0.0823681	0.587155	0.997856	0	0	9.16108	3.57295	10.8989	0	0	0	0	1.59774	0	0	21.8152
bmo-mir-965-5p	3.61443	6.67149	1.84579	1.873	5.64611	1.73406	3.27142	-0.000665165	0.0823865	0.835904	0.997856	0	0	0	0	0	0	13.111	15.7689	0	18.1078	0	0	0
miR-11980-3p	3.61306	8.30338	2.29816	2.19008	5.2732	1.58166	4.54303	0.000329068	0.082387	0.766776	0.997856	12.0609	0	0	0	3.26966	0	0	0	0	0	0	1.51353	30.1257
miR-147-3p	3.60792	6.92078	1.91822	5.33093	1.59774	3.19775	1.45853	-1.35305e-05	0.0823916	0.783481	0.997856	0	0	24.4295	0	3.26966	9.61731	0	0	0	9.58647	0	0	0
cin-mir-4200-3p	3.57612	6.52914	1.82576	3.19434	4.02154	1.43111	3.54189	0.00135602	0.082374	0.605045	0.997856	0	2.83241	0	2.85836	5.44943	11.2202	0	0.716767	23.4124	0	0	0	0
miR-146a-3p	3.57357	7.02525	1.96589	4.17011	2.8776	3.03811	2.26036	-0.00140844	0.0824039	0.459015	0.997856	0	0	0	0	5.99437	0	23.1964	0	0	2.13033	0	15.1353	0
miR-2285bp	3.55886	5.36874	1.50856	4.5614	2.38922	1.95984	2.18105	-0.00136028	0.0823931	0.466385	0.997856	12.0609	0	12.2148	0	0	1.60288	6.05123	14.3353	0	0	0	0	0
miR-12025-3p	3.54738	9.67874	2.72842	1.00854	6.50937	0.933724	5.47046	-0.000262705	0.0823837	0.975691	0.997856	0	0	0	0	0	0	7.05976	0	0	2.66291	36.3933	0	0
mml-mir-640-3p	3.52527	4.67357	1.32573	4.34464	2.56933	1.93359	1.58611	-0.000680953	0.0823923	0.47966	0.997856	0	0	3.05369	3.57295	14.1685	9.61731	0	0	0	5.32582	0	10.0902	0
miR-502a-2-3p	3.51211	5.48141	1.56072	3.14215	3.94373	1.99116	2.32289	-0.00123611	0.0823924	0.374917	0.997856	0.548223	0	0	1.42918	15.8033	3.20577	1.00854	0	0	7.45614	15.1972	1.00902	0
miR-1468	3.49715	9.70292	2.77453	1.30061	6.05977	1.00111	5.53178	0.000276521	0.0823946	0.689936	0.997856	7.67512	0	0	1.42918	0	0	0	0	0	0	0	0	36.3586
hsa-mir-4330-5p	3.4944	4.84642	1.38691	4.36249	2.48162	1.98235	1.67793	0.000243329	0.0823451	0.867165	0.997856	0	11.3296	0	12.148	0	0	7.05976	0	0	2.66291	0.799853	0	11.427
miR-2468-3p	3.49166	5.37838	1.54035	4.64996	2.14031	2.47737	1.23573	-0.0010449	0.0823836	0.603794	0.997856	9.86801	0	18.3222	0	4.35954	0	0	6.4509	0	6.39098	0	0	0
gga-mir-6596-5p	3.46954	5.79476	1.67018	3.70612	3.19353	2.44982	1.98328	-0.000807969	0.0823772	0.714712	0.997856	0	7.78913	0	0	0	0	18.1537	13.6186	0	0	3.99927	0.504509	1.03882
oan-mir-1400-5p	3.43987	5.89703	1.71432	4.05956	2.71691	2.2205	2.38427	-0.000197035	0.0823879	0.891754	0.997856	0	16.2864	3.05369	0	0	0	9.07684	15.7689	0	0.532582	0	0	0
hsa-mir-6760-5p	3.43869	5.01156	1.4574	2.57154	4.45037	1.25669	2.56968	0.0011785	0.0823732	0.6795	0.997856	3.83756	0	9.16108	5.00213	0	0	0	0	0	0	13.1976	0	13.5046
miR-1277-5p	3.40586	7.92521	2.32693	5.25715	1.24602	3.8884	0.81091	-0.000155329	0.0823876	0.972367	0.997856	0	29.7403	0	0	0	0	7.05976	2.1503	0	5.32582	0	0	0
miR-3613-5p	3.39646	6.36153	1.87299	1.72882	5.34205	1.03323	3.46253	0.00123869	0.0823921	0.374448	0.997856	0	0	6.10738	0	5.99437	0	0	0	0	0	0	22.7029	9.34935
cfa-mir-8843-5p	3.39027	7.21494	2.12813	1.38726	5.72711	0.66587	4.06252	0.000187364	0.0823719	0.838758	0.997856	4.93401	0	3.05369	0.71459	0	0	1.00854	7.16767	0	0	27.195	0	0
gga-mir-1804-5p	3.3899	8.86637	2.61553	5.76294	0.621345	4.34477	0.567208	-0.000400555	0.0823874	0.938616	0.997856	0	33.2808	0	0	0	0	7.05976	0	0	3.72807	0	0	0
cgr-mir-1956-3p	3.37966	6.85546	2.02845	5.4396	0.9764	3.25139	0.891327	-0.000616134	0.0823822	0.807323	0.997856	3.28934	24.7836	0	10.0043	0	0	0	0	0	5.8584	0	0	0
let-7a-3-3p	3.30702	2.92537	0.884592	1.66339	5.2246	0.399688	1.31709	0.00437526	0.082395	0.431757	0.997856	2.74111	0.708102	0	2.85836	2.72471	1.60288	1.00854	3.58384	11.7062	5.8584	5.59897	2.52255	2.07763
miR-196a-1-5p	3.28843	5.12731	1.5592	4.30923	2.09749	2.039	1.84269	-0.00138534	0.082385	0.531835	0.997856	10.9645	14.162	0	2.85836	2.17977	0	0	12.185	0	0	0.399927	0	0
miR-379-5p	3.28793	5.48511	1.66826	4.73677	1.59761	2.40202	1.45841	-0.000675819	0.0823968	0.412123	0.997856	0	0	0	5.71672	9.80897	17.6317	0	0	0	0	0	9.58568	0
miR-328-5p	3.28059	5.65542	1.72391	3.21357	3.35877	1.99324	2.47792	2.02446e-05	0.0823466	0.963161	0.997856	0	0	6.10738	0.71459	0.544943	0	15.1281	0	0	0	0	3.53157	16.6211
miR-23a-3p;miR-23b-3p	3.25525	6.25698	1.92212	4.67206	1.60229	2.89671	1.36776	-0.00138748	0.0824059	0.383476	0.997856	0	0	0	0	12.5337	0	20.1708	0	0	0.532582	0	9.08117	0
eca-mir-9171-5p	3.24266	5.53305	1.70633	4.12124	2.21766	2.37416	1.7487	0.000791921	0.0823711	0.725953	0.997856	0.548223	2.83241	18.3222	7.1459	0	0	0	0	11.7062	0	1.59971	0	0
mmu-mir-8103-5p	3.24205	6.37941	1.96771	6.02094	0	2.89947	0	-0.00145009	0.0824126	0.509612	0.997856	0	0	9.16108	12.148	0	20.8375	0	0	0	0	0	0	0
mmu-mir-3960-3p;ptc-MIR6423-3p	3.22208	3.48578	1.08184	3.31256	3.11651	1.13905	1.61813	0.000418218	0.0823274	0.956667	0.997856	1.09645	7.78913	6.10738	2.14377	0	0	6.05123	1.43353	11.7062	0.532582	1.99963	3.02706	0
hcmv-mir-UL70-3p	3.21339	6.44163	2.00462	3.91982	2.38922	2.71282	2.18105	-0.00116297	0.0823995	0.46924	0.997856	0	0	3.05369	0	0	3.20577	21.1793	14.3353	0	0	0	0	0
miR-4286-2-3p;miR-4286-1-5p	3.20851	8.18553	2.55119	1.6166	5.06574	1.13166	4.62436	-2.5515e-05	0.08239	0.941958	0.997856	2.74111	0	0	8.57508	0	0	0	0	0	0	30.3944	0	0
miR-2285ak-5p	3.19426	5.43761	1.70231	4.41487	1.77021	2.6591	0.652182	-0.000123194	0.0822945	0.96973	0.997856	2.74111	2.12431	21.3758	3.57295	1.08989	0	0	1.43353	0	3.72807	0.799853	0.504509	4.15527
miR-599-5p	3.18676	5.31808	1.6688	3.28586	3.07114	2.05069	2.11775	-0.000423375	0.0823944	0.548424	0.997856	0	0	0	8.57508	0	14.426	0	4.3006	0	0	0	14.1263	0
miR-2285bs-3p	3.18089	5.17981	1.62842	4.46178	1.68651	2.20659	1.53956	-0.0014209	0.0823995	0.49006	0.997856	15.8985	0	0	5.71672	0	9.61731	0	0	0	10.1191	0	0	0
miR-486	3.13863	4.22401	1.34581	3.32733	2.91848	1.46855	1.86886	-3.35622e-05	0.0823906	0.933743	0.997856	0	0	9.16108	9.28967	1.63483	3.20577	0	12.185	0	5.32582	0	0	0
hsa-mir-8072-5p	3.13213	6.52592	2.08354	5.66842	0.173136	3.04784	0.158051	-0.00161648	0.0824138	0.61395	0.997856	0	0	15.2685	3.57295	0	20.8375	0	0	0	0	0	0	1.03882
xla-mir-1306-5p	3.12656	3.43213	1.09773	2.42663	3.94315	1.0278	1.61539	0.00179988	0.0823812	0.418311	0.997856	0	0	3.05369	6.43131	1.08989	6.41154	0	0	0	7.98872	8.39846	0	7.27172
ssc-mir-4332-5p;hsv2-miR-H10-3p	3.10024	4.05519	1.30802	1.12872	5.40035	0.709712	1.90137	-0.000388601	0.0823757	0.913543	0.997856	0	0	0	2.85836	0	0	5.04269	12.185	0	3.72807	6.39883	10.0902	0
pxy-mir-8516-5p	3.06611	8.97534	2.92727	5.38987	0.355054	4.42985	0.324119	-0.00021348	0.0823866	0.853355	0.997856	0	33.9889	0	0.71459	0	0	3.02561	0	0	2.13033	0	0	0
hsa-mir-6070-3p	3.0649	7.41908	2.42066	5.69196	0	3.53086	0	-0.000694764	0.0824	0.822853	0.997856	0	26.1998	12.2148	1.42918	0	0	0	0	0	0	0	0	0
miR-29e-3p	3.06165	4.8925	1.59799	4.24035	1.68651	2.04428	1.53956	-0.000671913	0.0823858	0.701497	0.997856	4.93401	0	12.2148	0	12.5337	0	0	0	0	10.1191	0	0	0
sbo-mir-24-1-3p	3.03885	7.5783	2.4938	1.75858	4.5325	1.46686	4.13759	-0.000346936	0.0823927	0.722655	0.997856	0	0	0	0	1.08989	11.2202	0	0	0	0	27.195	0	0
hsa-mir-4649-5p	3.03566	6.52053	2.14798	2.22439	3.98213	1.16952	3.63517	0.00083364	0.0823733	0.574673	0.997856	0	0	6.10738	7.86049	0	1.60288	0	0	0	0	0	0	23.8928
cja-mir-1895-3p	3.018	5.80222	1.92254	4.07127	1.78918	2.73968	1.21385	-0.00162355	0.0824065	0.391691	0.997856	0	0	0	5.71672	0	1.60288	21.1793	0	0	2.66291	0	8.07215	0
hsa-mir-3652-5p	3.0123	4.85153	1.61058	3.01504	3.0091	1.29362	2.49437	-0.000581415	0.082303	0.943626	0.997856	0.548223	2.83241	3.05369	1.42918	0.544943	1.60288	11.0939	1.43353	0	0	0	0	16.6211
hsa-mir-6865-5p	2.98636	7.95104	2.66245	1.24243	5.02095	0.62959	4.58348	-3.64637e-05	0.0823696	0.917523	0.997856	0	0	0	3.57295	1.08989	0	4.03415	0	0	0	0	0	30.1257
miR-1468-5p	2.98254	3.78985	1.27068	4.55744	1.14514	1.6268	0.734535	-0.00255296	0.0824099	0.4825	0.997856	2.74111	0	6.10738	2.85836	7.08425	0	13.111	0	0	4.79323	0	0	2.07763
tgu-mir-2961-5p	2.9736	6.37853	2.14505	3.53603	2.31742	2.762	2.04336	-0.00113719	0.0823918	0.666238	0.997856	0	0	0	3.57295	0	0	21.1793	0	0	0	0.399927	0	13.5046
nle-mir-149-2-3p	2.94897	5.34949	1.81402	5.17233	0.355054	2.44643	0.324119	-0.00132525	0.0823946	0.569218	0.997856	0	18.4107	6.10738	0	0	1.60288	10.0854	0	0	2.13033	0	0	0
eca-mir-7045-5p	2.93158	6.38715	2.17874	3.44306	2.33486	2.77178	2.0407	0.00154759	0.0823906	0.449489	0.997856	0	21.2431	0	2.85836	0	0	0	0	0	0	0	0.504509	13.5046
eca-mir-8938-3p	2.93154	5.73338	1.95576	4.95002	0.576646	2.72646	0.189427	0.000306667	0.082359	0.629686	0.997856	0	21.9512	6.10738	2.85836	2.72471	0	1.00854	0.716767	0	0	1.19978	0.504509	1.03882
miR-10a	2.92809	5.0537	1.72594	4.37271	1.24269	2.27694	1.13442	-0.00137629	0.0824049	0.410221	0.997856	0	0	0	0	5.44943	8.01442	17.1451	0	0	7.45614	0	0	0
mmu-mir-328-5p	2.92018	4.15043	1.42129	3.59495	2.13294	1.28214	1.9471	-0.000158659	0.0823877	0.966642	0.997856	0	5.66482	9.16108	4.28754	0	0	6.05123	0	0	0	12.7977	0	0
cfa-mir-8811-3p	2.89813	4.39754	1.51737	3.72736	1.93069	1.67873	1.69051	-5.98223e-05	0.0823883	0.882466	0.997856	0	0.708102	9.16108	5.00213	0	11.2202	0	0	0	11.1842	0.399927	0	0
hsa-mir-3195-3p	2.88667	5.02184	1.73967	5.07933	0.328554	2.277	0.155906	-0.00235548	0.0824258	0.368411	0.997856	0	0	9.16108	14.2918	0	0	12.1025	0	0	0.532582	0.399927	0	1.03882
miR-2285av-5p;miR-2284y-1-3p;miR-2284y-4-5p	2.8846	4.19397	1.45392	2.76419	3.02508	1.34878	1.96709	0.00035006	0.0823892	0.521742	0.997856	0	0	6.10738	10.0043	1.63483	1.60288	0	0	0	13.3145	0.799853	4.03608	0
oha-mir-204-2-5p	2.87708	3.49864	1.21604	2.17242	3.69917	1.20798	1.49158	0.00196144	0.08233	0.661081	0.997856	1.09645	0	0	2.85836	1.63483	9.61731	0	1.43353	11.7062	2.13033	2.79949	1.00902	3.11645
miR-383	2.85349	5.08874	1.78334	4.21824	1.26127	2.30645	1.15138	-0.000842014	0.0823922	0.503224	0.997856	1.09645	0	0	17.1502	9.26402	0	2.01708	0	0	0	0	7.56764	0
miR-6536-2-5p;miR-6536-1-5p	2.826	5.85639	2.07232	1.61657	4.237	0.978009	3.23527	-0.000271921	0.0823917	0.764375	0.997856	0	0	0	0	4.90448	6.41154	0	0	0	3.72807	0	21.6939	0
tgu-mir-2981-3p	2.80961	4.4727	1.59193	3.01696	2.5677	1.75819	1.73159	-0.00034874	0.0823605	0.723377	0.997856	0	6.37292	0	0	1.63483	0	13.111	0	11.7062	3.19549	0	0.504509	0
miR-10183-3p	2.80328	7.51833	2.68197	4.76089	0.519409	3.69394	0.474153	-0.000381212	0.0823877	0.773624	0.997856	0	28.3241	0	5.00213	0	0	0	0	0	0	0	0	3.11645
rno-mir-540-5p	2.79986	5.64874	2.01751	1.69911	4.08407	1.01974	3.09784	0.000548717	0.0823775	0.802023	0.997856	5.48223	0	0	0	0	6.41154	0	0	0	3.72807	0	0	20.7763
mmu-mir-186-3p	2.76415	2.88285	1.04294	3.089	2.38516	0.493806	1.62012	-0.000868951	0.0823263	0.837541	0.997856	2.19289	2.83241	3.05369	5.00213	2.72471	4.80865	1.00854	0	0	1.06516	11.1979	1.00902	1.03882
miR-2443-5p	2.7586	8.05492	2.91993	5.12312	0	3.93485	0	-0.000935992	0.0824015	0.968759	0.997856	0	30.4484	0	2.14377	3.26966	0	0	0	0	0	0	0	0
miR-628-5p	2.74826	4.2245	1.53715	3.73442	1.59774	1.69435	1.45853	-0.00101511	0.0823904	0.594433	0.997856	10.4162	0	6.10738	0	0	9.61731	0	0	0	9.58647	0	0	0
hhi-mir-26-2-5p	2.7274	5.07077	1.8592	3.69568	1.59774	2.22904	1.45853	-0.000576416	0.082395	0.508789	0.997856	0	0	0	0	11.4438	14.426	0	0	0	9.58647	0	0	0
miR-29c	2.68696	5.07489	1.88871	3.40447	1.84987	2.13971	1.68869	-0.00160521	0.0823962	0.591788	0.997856	16.9949	0	3.05369	0	2.17977	1.60288	0	0	0	0	0	11.0992	0
miR-11986c-5p	2.67796	4.56766	1.70565	4.60873	0.425391	2.08201	0.251891	-0.000511157	0.0823839	0.943442	0.997856	0	0	15.2685	10.0043	2.17977	4.80865	0	0	0	0	0	1.51353	1.03882
miR-671-5p	2.67785	6.23152	2.32706	1.72892	3.78494	1.60067	3.18683	-0.000846844	0.0823905	0.789668	0.997856	0	0	0	0	0	0	12.1025	0	0	0	21.1961	1.51353	0
cfa-mir-483-5p	2.67455	5.83829	2.1829	2.05327	3.39938	1.35967	3.10319	-0.000563473	0.0823901	0.698258	0.997856	0	0	0	4.28754	0	0	10.0854	0	0	0	20.3963	0	0
hsa-mir-6803-5p	2.66982	4.91937	1.84258	2.50772	2.85894	1.33019	2.51386	-0.000671125	0.0823681	0.788667	0.997856	2.74111	0	0	10.0043	0	4.80865	0	0	0	0.532582	0	0	16.6211
ssc-mir-200b-3p	2.66864	3.61785	1.35569	3.15812	2.09758	1.41764	1.37483	-0.000448114	0.0823923	0.631746	0.997856	0	0	0	6.43131	9.26402	6.41154	0	0	0	9.05389	0	3.53157	0
hsa-mir-3116-1-3p	2.66742	4.11475	1.54259	4.57337	0.443818	1.80193	0.405149	-0.00114953	0.0823903	0.625652	0.997856	0	7.78913	0	14.2918	1.08989	4.80865	4.03415	0	0	2.66291	0	0	0
miR-2285ah-5p	2.65621	3.15679	1.18846	1.7349	3.73107	0.659861	1.62737	0.00288251	0.0823851	0.487438	0.997856	0.548223	0.708102	3.05369	0	0	4.80865	3.02561	0.716767	11.7062	0	4.79912	1.00902	4.15527
miR-2285dg-3p	2.64797	4.30446	1.62557	3.94363	1.13636	2.01423	0.679244	-0.00148437	0.0823911	0.572729	0.997856	11.5127	0	0	0	3.26966	12.8231	0	0	0	2.66291	0	0	4.15527
miR-497	2.61903	5.07249	1.93678	2.63787	2.59704	1.64222	2.37076	-0.00110194	0.0823865	0.526176	0.997856	3.83756	0	0	0.71459	1.08989	12.8231	0	0	0	0	0	0	15.5823
chi-mir-877-5p	2.61596	7.30794	2.79359	4.55765	0.350663	3.60165	0.202479	0.000257541	0.0823893	0.590064	0.997856	0	27.616	0	4.28754	0	0	0	0	0	1.06516	0	0	1.03882
api-mir-100-5p	2.61506	2.94683	1.12687	1.66663	3.72155	0.490385	1.5587	0.00121892	0.0822803	0.842843	0.997856	3.28934	2.83241	0	1.42918	1.08989	0	3.02561	2.1503	11.7062	2.13033	4.79912	0.504509	1.03882
mmu-mir-1894-3p	2.60303	3.80801	1.46291	4.14945	0.798872	1.64811	0.729267	-0.000722954	0.0823859	0.757476	0.997856	0	9.20533	9.16108	0	0	1.60288	9.07684	0	0	4.79323	0	0	0
bmo-mir-3208-5p	2.60244	2.50441	0.962333	3.12038	1.99817	0.87248	1.05631	-0.000710138	0.0823205	0.893396	0.997856	2.19289	3.54051	6.10738	6.43131	0.544943	0	3.02561	0.716767	0	2.13033	7.59861	0.504509	1.03882
ame-mir-9891-5p	2.57249	3.49287	1.35778	3.76833	1.17734	1.48536	0.894498	-0.000653063	0.0823716	0.841561	0.997856	0.548223	1.4162	12.2148	6.43131	0.544943	3.20577	2.01708	0	0	1.06516	5.9989	0	0
pbv-mir-34b-3p	2.56505	6.08801	2.37344	0.726348	4.71021	0.288999	3.44182	0.00365932	0.0824483	0.480062	0.997856	1.64467	0.708102	0	0.71459	0	0	2.01708	0	23.4124	0.532582	1.19978	0	3.11645
miR-11986b-5p	2.54783	4.4005	1.72715	1.71655	3.51766	1.2747	2.11895	-0.000492435	0.0823718	0.974228	0.997856	9.86801	0	0	0	0.544943	1.60288	0	0	0	7.98872	0	13.1172	0
miR-362-3p	2.5398	5.32081	2.09497	2.04552	3.11645	1.22032	2.84492	-0.000221272	0.0823865	0.797105	0.997856	8.77157	0	0	5.00213	0.544943	0	0	0	0	0	0	0	18.6987
ssa-mir-30d-1-5p	2.51333	1.82232	0.725065	2.85797	2.11124	0.756326	0.60874	-0.00102367	0.0822765	0.876212	0.997856	3.83756	2.12431	6.10738	1.42918	4.90448	1.60288	0	3.58384	0	1.59774	4.39919	1.00902	2.07763
miR-138-2-3p	2.50454	5.86909	2.34338	3.43395	1.42022	2.76342	1.29648	-0.00125983	0.0824008	0.514449	0.997856	0	0	0	2.85836	0	0	21.1793	0	0	8.52131	0	0	0
miR-2468-5p	2.5037	5.04946	2.0168	2.25856	2.7897	1.92714	2.03149	6.19031e-05	0.0823763	0.949563	0.997856	1.09645	0	0	0	14.7135	0	0	0	0	0	0	13.6218	3.11645
ssc-mir-9799-5p	2.50152	6.16124	2.463	1.18678	4.03538	0.574961	3.53976	0.00127757	0.082377	0.964514	0.997856	3.83756	1.4162	3.05369	0	0	0	0	0	23.4124	0	0.799853	0	0
cfa-mir-8865-5p	2.4993	3.41283	1.36551	2.79784	2.151	0.896135	1.75368	-0.000324569	0.0823559	0.696398	0.997856	0	4.95672	3.05369	0.71459	0	4.80865	6.05123	0	11.7062	0	1.19978	0	0
miR-153-2-3p;miR-153-1-3p	2.4849	5.57467	2.24342	1.33958	3.82111	0.850324	3.11214	0.00172345	0.082404	0.408067	0.997856	0	0	6.10738	0	3.26966	0	0	2.1503	0	0	0	0	20.7763
hsa-mir-1234-5p	2.4712	5.09499	2.06174	2.01842	2.99945	1.14691	2.73811	-0.000931264	0.0823858	0.711393	0.997856	2.74111	0.708102	0	0	0	1.60288	9.07684	0	0	0	17.9967	0	0
mdo-mir-7262d-3p	2.46812	4.4001	1.78277	1.73451	3.32401	1.49942	1.92472	0.00103716	0.0823887	0.387861	0.997856	0	0.708102	0	11.4334	0	0	0	0	0	0	0	10.5947	9.34935
bmo-mir-2783-3p	2.46515	6.71448	2.72376	4.38779	0.222072	3.28697	0.132026	-0.000483114	0.0823862	0.956638	0.997856	0	25.4917	0	0	0	3.20577	2.01708	0	0	0.532582	0.799853	0	0
miR-2284y-1-3p;miR-2284y-4-5p;miR-2284x-5p	2.45584	4.07357	1.65873	3.26742	1.50898	1.67467	1.37751	5.53171e-05	0.0823924	0.657736	0.997856	0	0	12.2148	3.57295	7.08425	0	0	0	0	9.05389	0	0	0
eca-mir-8969-5p	2.45429	3.02678	1.23326	2.68611	2.18384	1.146	1.22396	-0.00148087	0.0823832	0.500973	0.997856	0.548223	0.708102	3.05369	2.85836	0	9.61731	2.01708	8.60121	0	1.59774	2.39956	0.504509	0
mmu-mir-6987-5p	2.44447	4.41522	1.80621	4.43733	0.119461	1.98341	0.109053	-0.00112975	0.0824041	0.431668	0.997856	0	0	0	12.148	10.8989	8.01442	0	0.716767	0	0	0	0	0
mmu-mir-7060-5p	2.42785	6.50286	2.67845	4.20452	0.355054	3.18824	0.324119	5.70945e-05	0.0823935	0.595096	0.997856	0	0	24.4295	5.00213	0	0	0	0	0	2.13033	0	0	0
miR-30c-3p	2.41865	5.70737	2.35973	0.81126	4.29394	0.541583	3.20549	-0.00034887	0.0823825	0.94181	0.997856	1.64467	0	0	0	0	0	4.03415	21.503	0	4.26065	0	0	0
rno-mir-347-5p	2.41408	5.26134	2.17944	3.7583	0.845815	2.55303	0.602694	-0.00125127	0.0823982	0.571124	0.997856	0	0	0	7.1459	0	0	19.1622	0	0	0	0	4.03608	1.03882
hsa-mir-6124-5p	2.41046	6.80716	2.82401	3.86791	0.710109	3.36562	0.648238	-0.000781325	0.0823974	0.470831	0.997856	0	0	0	1.42918	0	25.6462	0	0	0	4.26065	0	0	0
miR-378-3p;miR-378c-5p;miR-378-2-5p	2.40942	4.82545	2.00274	1.95208	2.94297	0.900106	2.68655	0.000179988	0.0823937	0.665945	0.997856	0	0	6.10738	4.28754	3.26966	0	0	0	0	0	0	17.6578	0
miR-29a-5p	2.40674	4.01597	1.66863	2.03913	2.83562	1.47158	1.67914	-0.000132553	0.0823911	0.890399	0.997856	0	0	3.05369	0	0	11.2202	0	0	0	6.92356	0	10.0902	0
miR-378b-5p	2.39999	6.57901	2.74127	0.306253	4.84268	0.283535	3.69782	0.000422568	0.0823942	0.413008	0.997856	0	0	0	2.14377	0	0	0	0	0	4.26065	24.7955	0	0
ppy-mir-2861-3p	2.34625	5.43439	2.31621	3.96544	0.457184	2.64437	0.205415	-0.00154236	0.0824008	0.518734	0.997856	0	0	3.05369	2.85836	0	20.8375	1.00854	0	0	0	1.19978	0.504509	1.03882
ola-mir-125b-1-5p	2.34589	6.39139	2.72451	0.726806	4.23482	0.282575	3.67944	0.000870622	0.0823711	0.688754	0.997856	1.09645	0	0	1.42918	0.544943	0	2.01708	24.3701	0	0	0	0	1.03882
eca-mir-9071-5p	2.33327	4.66891	2.00101	3.68457	0.756764	2.20625	0.690828	-6.00541e-05	0.0823941	0.620431	0.997856	0	0	12.2148	13.5772	0	0	0	0	0	0	0	4.54058	0
mdo-mir-12401-3p	2.32925	4.91696	2.11096	3.7251	0.700751	2.3753	0.479669	-0.00168157	0.0823955	0.531959	0.997856	6.03045	0	18.3222	0.71459	0	0	1.00854	0	0	3.19549	0	1.00902	0
cgr-mir-1973-3p	2.31553	3.31741	1.43268	3.82425	0.555345	1.44473	0.417344	-0.00127491	0.0823745	0.695261	0.997856	1.09645	4.95672	12.2148	4.28754	0	3.20577	1.00854	0	0	0.532582	2.79949	0	0
miR-504-5p	2.28415	4.15398	1.81861	3.27297	1.13053	1.98281	0.684101	-0.00048069	0.0823819	0.86635	0.997856	2.19289	0	15.2685	0	5.44943	0	0	0	0	4.26065	0	2.52255	0
mcmv-mir-m01-4-5p	2.26022	3.56294	1.57637	3.62096	0.672679	1.58675	0.614069	-0.00118253	0.082403	0.411999	0.997856	0	0	0	0	9.26402	8.01442	8.0683	0	0	0	0	4.03608	0
cin-mir-92b-3p	2.23279	3.97956	1.78233	1.32942	3.28671	0.803407	2.1205	0.00168979	0.0823745	0.564708	0.997856	1.09645	0.708102	0	0	1.08989	6.41154	0	0	0	0	0.399927	14.1263	5.19409
gga-mir-1770-3p	2.20808	4.84295	2.19328	4.0436	0.0666544	2.2753	0.0608469	-0.0011635	0.0824037	0.528758	0.997856	0	4.95672	0	5.71672	0	17.6317	0	0	0	0	0.399927	0	0
eca-mir-9157-3p	2.20619	4.78701	2.16981	1.43497	3.10593	0.857571	2.65018	6.53814e-05	0.0823808	0.944736	0.997856	0	0	0	5.00213	0	0	5.04269	0	0	0	17.5968	0	1.03882
miR-502a	2.19798	4.86137	2.21175	2.67829	1.63761	2.24205	1.26289	-0.00154663	0.0824043	0.552431	0.997856	0	0	0	0	0	1.60288	17.1451	0	0	8.52131	0.799853	0.504509	0
miR-2285b-2-5p	2.1906	5.10482	2.33033	0.949074	3.63904	0.642305	2.86345	9.55649e-05	0.0823888	0.815206	0.997856	1.09645	0	0	5.00213	0.544943	0	0	0	0	2.66291	0	19.1714	0
mdo-mir-12380-5p	2.18465	3.25502	1.48995	3.29638	0.887636	1.395	0.810297	-0.00226523	0.082419	0.387569	0.997856	7.67512	0.708102	0	0.71459	4.35954	9.61731	0	0	0	5.32582	0	0	0
eca-mir-9170-3p	2.1832	2.79786	1.28154	2.16488	2.20457	0.938101	1.27625	-0.000136767	0.0823458	0.9588	0.997856	0.548223	0.708102	0	6.43131	5.44943	0	2.01708	0.716767	0	9.05389	0.399927	2.01804	1.03882
miR-1777b-3p	2.17818	3.21283	1.475	1.91319	2.48734	1.00767	1.52178	-0.000996607	0.082389	0.628933	0.997856	1.64467	0	0	0	2.72471	8.01442	1.00854	0	0	5.32582	9.59824	0	0
sja-mir-3488-3p	2.17693	3.45939	1.58912	2.269	2.0695	1.45552	1.19767	-0.000438221	0.0823921	0.672972	0.997856	0	0	0	3.57295	1.08989	11.2202	0	0	0	5.8584	0	6.55862	0
miR-539	2.17126	4.08566	1.8817	1.17383	3.33493	0.92951	2.10542	-0.000273403	0.0823791	0.961076	0.997856	7.1269	0	0	0	1.08989	0	0	13.6186	0	6.39098	0	0	0
mse-mir-929b-5p	2.15074	1.35429	0.629684	1.83541	2.51862	0.382984	0.648673	0.00104372	0.082315	0.673226	0.997856	0.548223	0.708102	3.05369	2.14377	2.17977	3.20577	1.00854	3.58384	0	2.66291	4.79912	3.02706	1.03882
miR-2285bb-5p	2.12531	4.88872	2.30024	3.35764	0.687578	2.38947	0.468265	-0.00163818	0.0823982	0.599603	0.997856	3.28934	0	0	18.5793	1.63483	0	0	0	0	0	0	1.00902	3.11645
miR-409a	2.10609	3.09327	1.46873	3.01435	1.04645	1.40132	0.659447	-0.00168128	0.0824045	0.461868	0.997856	6.57867	0	0	0	4.90448	9.61731	0	0	0	4.26065	0	2.01804	0
dno-mir-200b-3p	2.09305	4.75005	2.26943	3.29398	0.691969	2.33801	0.316066	0.000474266	0.0823724	0.606343	0.997856	0	2.12431	18.3222	0	0	1.60288	1.00854	0	0	1.06516	0	1.00902	2.07763
miR-487a-3p	2.08643	4.6128	2.21085	2.79372	1.26127	2.12518	1.15138	0.000260691	0.0823944	0.437531	0.997856	0	16.2864	0	0	3.26966	0	0	0	0	0	0	7.56764	0
xla-mir-103b-3p	2.0854	3.95058	1.89441	2.96741	1.05638	1.89155	0.661943	-0.000907214	0.0823819	0.764146	0.997856	0	0	6.10738	0	0.544943	0	14.1195	0	0	4.26065	0	0	2.07763
rno-mir-3102-5p	2.0809	3.37406	1.62145	1.28899	3.00478	1.04606	1.53539	0.000136937	0.0823705	0.895098	0.997856	0	0	0	0	0	8.01442	1.00854	8.60121	0	7.98872	0.399927	0	1.03882
efu-mir-2683-3p	2.07335	3.64279	1.75696	1.35191	2.91503	1.02582	1.7721	8.29957e-05	0.0823931	0.772743	0.997856	0	0	0	7.86049	0	1.60288	0	0	0	6.39098	0	11.0992	0
egr-mir-10280-5p	2.06394	4.2071	2.03839	3.83303	0	1.93058	0	-0.00111892	0.0824045	0.867468	0.997856	0	14.162	0	7.86049	0	4.80865	0	0	0	0	0	0	0
ola-mir-99-5p	2.05549	3.87259	1.88402	2.0103	2.10822	1.20703	1.85247	0.000160332	0.0823875	0.785346	0.997856	1.09645	0	9.16108	0	3.8146	0	0	0	0	12.2494	0.399927	0	0
aca-mir-129b-3p	2.0435	4.46492	2.18494	3.723	0.0840849	2.10038	0.0767587	-0.00103397	0.0824019	0.574069	0.997856	0	0	0	12.148	1.08989	12.8231	0	0	0	0	0	0.504509	0
ssa-mir-21a-2-5p	2.032	1.63843	0.806311	1.84549	2.2496	0.473865	0.805662	0.00215091	0.0822718	0.69252	0.997856	3.83756	2.12431	3.05369	0.71459	2.17977	0	1.00854	0.716767	0	2.13033	2.39956	2.01804	6.2329
miR-2285c-3p	2.01341	2.42451	1.20418	2.23243	1.75789	0.713936	1.1869	-0.00120016	0.0823827	0.601909	0.997856	2.74111	0	3.05369	5.71672	1.08989	0	3.02561	7.88444	0	2.66291	0	0	0
hpo-mir-10055-3p	2.00903	3.55454	1.76929	3.51057	0.257221	1.6233	0.161305	-0.000222256	0.0823722	0.805299	0.997856	0	12.7458	6.10738	3.57295	0.544943	1.60288	0	0	0	0	0	0.504509	1.03882
eca-mir-9011-5p	2.00408	5.52355	2.75616	0.752391	3.46437	0.511236	3.16253	-5.88645e-05	0.0823855	0.929896	0.997856	3.83756	0	0	1.42918	0	0	0	20.7862	0	0	0	0	0
tgu-mir-204-1-3p	1.97018	4.35816	2.21206	1.40988	2.62387	1.19959	2.18354	0.00168505	0.0824063	0.371774	0.997856	0	0.708102	9.16108	0	0	0	0	0	0	0	1.19978	0	14.5434
cel-mir-5592-1-3p	1.96315	2.93637	1.49574	2.58069	1.24269	1.10636	1.13442	-0.000840675	0.0823876	0.637134	0.997856	2.19289	0	0	7.86049	5.99437	0	2.01708	0	0	7.45614	0	0	0
cfa-mir-3958-5p	1.9596	5.61912	2.86749	0.155698	4.06415	0.144148	3.16271	0.000506624	0.0823924	0.449066	0.997856	0	0	0	0	1.08989	0	0	0	0	3.19549	0	21.1894	0
gga-mir-6594-5p	1.95614	4.94818	2.52956	3.63284	0	2.37186	0	-0.0013267	0.0824075	0.812657	0.997856	0	18.4107	0	5.00213	0	0	2.01708	0	0	0	0	0	0
miR-214-3p	1.9532	4.33361	2.21873	3.62737	0	2.02853	0	-0.00188185	0.0824259	0.372256	0.997856	1.09645	0.708102	9.16108	0	0	14.426	0	0	0	0	0	0	0
pbv-mir-9651-5p	1.94797	4.13531	2.12289	2.4501	1.36215	1.88177	1.11772	-0.000554641	0.0823942	0.610098	0.997856	0	0	0	0	2.72471	14.426	0	0.716767	0	7.45614	0	0	0
miR-154b-5p	1.94622	3.84853	1.97744	1.78842	2.13033	1.06923	1.94471	0.000148238	0.0823916	0.678068	0.997856	0	0	6.10738	0	0	6.41154	0	0	0	12.782	0	0	0
dre-mir-125c-5p	1.94595	2.85238	1.4658	1.52615	2.43571	0.437091	1.61361	0.000687201	0.0823652	0.653911	0.997856	1.64467	2.83241	3.05369	2.14377	0	0	1.00854	0.716767	0	11.1842	1.19978	1.51353	0
miR-135a-1-3p	1.94549	3.39646	1.74581	1.85925	2.04611	1.29595	1.36991	-0.000411626	0.0823933	0.693021	0.997856	0	0	0	0	9.80897	3.20577	0	0	0	3.19549	0	9.08117	0
bma-let-7-5p	1.92828	2.24347	1.16346	1.10296	2.89115	0.483671	1.10097	0.00281774	0.0824036	0.420025	0.997856	1.09645	0	3.05369	0	0.544943	0	3.02561	0.716767	0	6.39098	0	5.04509	5.19409
ola-mir-203-3p	1.9277	3.12131	1.61919	1.25504	2.71248	0.459086	1.74375	0.00045094	0.0823499	0.899239	0.997856	1.64467	0	0	0.71459	3.8146	1.60288	1.00854	0	11.7062	0.532582	0	4.03608	0
ame-mir-3739-3p	1.92587	3.28218	1.70425	2.03405	1.79967	0.933537	1.64287	-0.000736033	0.0823882	0.692207	0.997856	6.03045	0	0	5.00213	0	3.20577	0	0	0	0	10.798	0	0
bfl-mir-34e-3p	1.91335	3.41511	1.78488	1.44461	2.46023	0.913842	1.72696	0.000843942	0.082385	0.565081	0.997856	0	0	0	3.57295	6.53931	0	0	0	11.7062	0.532582	0	2.52255	0
miR-146b-3p	1.9049	3.47969	1.82671	3.53766	0	1.54506	0	-0.00141199	0.0824116	0.539327	0.997856	0	0	0	8.57508	8.17414	8.01442	0	0	0	0	0	0	0
pma-mir-203a-3p	1.87265	4.6038	2.45844	2.94295	0.623971	2.26247	0.451565	-0.00279046	0.0824463	0.397492	0.997856	17.5431	0.708102	0	0.71459	1.63483	0	0	0.716767	0	0	0	3.02706	0
miR-216b-3p	1.85031	2.428	1.31221	2.8597	0.672679	0.985708	0.614069	-0.00115404	0.0823912	0.5883	0.997856	3.28934	0	6.10738	5.71672	4.90448	0	0	0	0	0	0	4.03608	0
ppy-mir-1237-5p	1.83502	3.47624	1.89439	2.54467	1.0071	1.60779	0.795693	-0.00112385	0.0823951	0.551413	0.997856	0	0.708102	0	5.00213	0	0	12.1025	0.716767	0	5.32582	0	0	0
ccr-mir-738-3p	1.82657	2.50408	1.37092	2.47099	1.07475	1.14567	0.550315	-0.000164057	0.0823424	0.936932	0.997856	0.548223	2.12431	9.16108	1.42918	0	0	4.03415	0	0	0.532582	2.79949	0	3.11645
gga-mir-12235-5p	1.82262	2.70436	1.48377	2.18234	1.40296	1.27971	0.597874	-0.00108652	0.0823649	0.778084	0.997856	0	0.708102	3.05369	1.42918	0	0	10.0854	0.716767	0	2.66291	3.99927	0	1.03882
gga-mir-1640-5p	1.81633	3.83428	2.11101	3.24397	0.150739	1.80663	0.0878978	-0.00156669	0.0824068	0.44987	0.997856	0	1.4162	12.2148	0	0	0	9.07684	0	0	0	0.399927	0.504509	0
let-7c-5p;let-7a-1-5p	1.81514	4.6177	2.54399	0.920497	2.85889	0.63671	2.60979	-0.000188983	0.0823909	0.932775	0.997856	0	0	0	0	1.63483	4.80865	0	0	0	0	0	17.1533	0
miR-2285at-4-3p;miR-2285bx-3p	1.79468	3.81908	2.128	2.19173	1.33145	1.65391	1.21545	-0.000458335	0.082393	0.684182	0.997856	0	0	0	1.42918	1.08989	12.8231	0	0	0	7.98872	0	0	0
cgr-mir-1956-3p;mmu-mir-1956-3p;rno-mir-1956-3p	1.79239	4.0116	2.23813	1.28082	2.38922	0.832832	2.18105	0.00018631	0.0823951	0.471452	0.997856	0	0	6.10738	2.85836	0	0	0	14.3353	0	0	0	0	0
ssc-mir-10386-3p	1.78628	2.68394	1.50253	3.01681	0.350663	1.18842	0.202479	-0.00174934	0.0823839	0.690864	0.997856	1.09645	3.54051	9.16108	5.71672	0	1.60288	0	0	0	1.06516	0	0	1.03882
gga-mir-1577-3p	1.78439	3.21094	1.79946	3.31387	0	1.41819	0	-0.00179372	0.0824222	0.410746	0.997856	0	0	9.16108	6.43131	0.544943	0	7.05976	0	0	0	0	0	0
tca-mir-3885-5p	1.77824	3.69591	2.07841	3.30244	0	1.70439	0	-0.00129985	0.082408	0.753655	0.997856	0	0.708102	12.2148	0	2.17977	8.01442	0	0	0	0	0	0	0
hsa-mir-4454-5p	1.76115	4.52479	2.56922	0.669877	3.03431	0.366703	2.59008	0.000278463	0.0823896	0.665862	0.997856	0.548223	1.4162	0	0	2.72471	0	0	0	0	0	17.1968	1.00902	0
dpu-mir-375-3p	1.75532	2.38835	1.36063	2.34661	1.06549	1.01146	0.721159	-0.00187979	0.0824035	0.50305	0.997856	6.03045	0	0	0.71459	3.26966	6.41154	0	0	0	4.79323	1.59971	0	0
xtr-mir-191-5p	1.75187	1.71121	0.97679	2.44013	0.948903	0.719173	0.392263	-0.00311146	0.0824005	0.556318	0.997856	6.03045	0.708102	0	2.85836	3.26966	3.20577	1.00854	0	0	1.59774	0	2.01804	2.07763
hsa-mir-639-5p	1.72417	4.85314	2.81477	2.82162	0.443818	2.39903	0.405149	0.000205085	0.0823942	0.511032	0.997856	0	0	18.3222	1.42918	0	0	0	0	0	2.66291	0	0	0
miR-2285bo	1.72085	2.66323	1.54763	2.31783	1.02437	1.31903	0.20749	-0.00392258	0.0824409	0.475163	0.997856	10.4162	3.54051	0	0.71459	0.544943	0	1.00854	1.43353	0	1.06516	1.59971	1.00902	1.03882
mmu-mir-30f-5p	1.72033	2.01585	1.17178	1.93261	1.47268	0.962914	0.431761	0.000983839	0.0823505	0.590567	0.997856	0	1.4162	3.05369	1.42918	7.6292	0	0	2.1503	0	1.06516	1.99963	0.504509	3.11645
miR-4444-3p	1.71526	1.46042	0.851424	1.79014	1.62791	0.597034	0.531652	0.000629622	0.082343	0.741149	0.997856	0	2.83241	0	2.85836	3.8146	0	3.02561	1.43353	0	0	3.19941	2.01804	3.11645
efu-mir-9272-5p	1.71311	3.69465	2.15669	3.18149	0	1.71877	0	-0.00182046	0.0824235	0.456978	0.997856	1.64467	10.6215	0	10.0043	0	0	0	0	0	0	0	0	0
miR-2284u-3p	1.70472	1.17062	0.686696	1.57055	1.86125	0.439353	0.473846	-0.000106584	0.0823058	0.931334	0.997856	1.64467	2.12431	0	3.57295	1.63483	0	2.01708	2.86707	0	2.13033	1.59971	3.53157	1.03882
mdo-mir-12368-5p	1.69598	3.29907	1.94523	0.71459	2.84093	0.661581	1.71137	0.000142635	0.0823936	0.620715	0.997856	0	0	0	5.00213	0	0	0	6.4509	0	0	0	10.5947	0
dre-mir-30c-3p	1.69483	2.54778	1.50326	1.979	1.3633	0.944915	1.04629	-0.00218569	0.0823955	0.54085	0.997856	7.67512	0.708102	0	2.85836	0	1.60288	1.00854	0.716767	0	0	0.399927	7.06313	0
miR-2285ce-3p	1.68581	3.76521	2.23347	2.95633	0.203546	1.80304	0.12015	-0.000990544	0.0823957	0.697698	0.997856	0	2.12431	0	14.2918	3.26966	0	1.00854	0.716767	0	0	0	0.504509	0
mml-mir-663-1-3p_mml-mir-663-2_stem-loop_mml-mir-663-3_stem-loop_mml-mir-663-4_stem-loop_mml-mir-663-5_stem-loop_mml-mir-663-6_stem-loop_mml-mir-663-7_stem-loop_mml-mir-663-8_stem-loop_mml-mir-663-9_stem-loop_mml-mir-663-10_stem-loop_mml-mir-663-11_stem-loop	1.67239	2.77506	1.65934	2.26175	0.9848	1.33035	0.474997	-0.000582365	0.082388	0.794145	0.997856	0.548223	0	0	9.28967	5.99437	0	0	0	0	3.19549	1.19978	1.51353	0
mmu-mir-7235-5p	1.66123	3.7142	2.23581	2.84168	0.284048	1.78996	0.183326	-4.0844e-05	0.0823934	0.658708	0.997856	0	12.7458	0	7.1459	0	0	0	0	0	0	1.19978	0.504509	0
miR-2387-5p	1.65749	3.05876	1.84542	2.84995	0.266291	1.41374	0.243089	-0.00142142	0.0824076	0.427625	0.997856	0	0	0	2.85836	0	8.01442	9.07684	0	0	1.59774	0	0	0
miR-11986b	1.65655	2.35988	1.42457	2.41577	0.7708	1.0643	0.475834	-0.000379654	0.0823915	0.936587	0.997856	0	0	6.10738	0	5.99437	4.80865	0	0	0	1.59774	0	3.02706	0
miR-7-1-3p	1.64382	3.15161	1.91724	2.11587	1.0931	1.3545	0.997863	-0.000420429	0.0823941	0.737189	0.997856	0	0	0	5.00213	9.80897	0	0	0	0	0	0	6.55862	0
tni-mir-125a-5p	1.63374	1.01723	0.622638	1.68074	1.57891	0.367701	0.434399	-0.00017755	0.0822729	0.952034	0.997856	2.19289	2.12431	0	2.14377	1.08989	3.20577	1.00854	2.1503	0	0.532582	3.19941	1.51353	2.07763
aae-mir-184-5p	1.63042	1.68306	1.03229	2.04675	1.1447	0.796378	0.294367	0.000361286	0.0823389	0.747558	0.997856	0	0.708102	3.05369	1.42918	2.72471	6.41154	0	0.716767	0	1.06516	1.99963	1.00902	2.07763
eca-mir-8981-5p	1.617	3.81168	2.35725	1.06051	2.26625	0.783794	2.06879	-0.000212806	0.0823922	0.905709	0.997856	0	0	0	1.42918	5.99437	0	0	0	0	0	13.5975	0	0
let-7a-2-3p	1.61244	3.39766	2.10715	1.481	1.76578	1.07164	1.61193	-0.000586049	0.0823898	0.75166	0.997856	2.19289	0	0	0	8.17414	0	0	0	0	0	0	10.5947	0
miR-29c-3p;miR-29b-1-3p;miR-29b-2-3p	1.60947	2.9181	1.81308	2.38036	0.710109	1.3291	0.648238	-0.000169302	0.0823911	0.782385	0.997856	0	0	9.16108	0	1.08989	6.41154	0	0	0	4.26065	0	0	0
miR-2284y-4-5p	1.60214	1.1232	0.701061	2.10472	1.01578	0.455612	0.258084	-0.00230131	0.082335	0.69342	0.997856	3.28934	2.12431	3.05369	3.57295	1.08989	1.60288	0	0.716767	0	2.13033	1.19978	1.00902	1.03882
bhv5-mir-B14-3p	1.59994	3.20346	2.00223	2.41215	0.65237	1.56708	0.292123	-0.000899403	0.0823827	0.751856	0.997856	1.64467	0	12.2148	0	0	0	3.02561	0.716767	0	1.59774	1.59971	0	0
miR-2284x-5p;miR-2284m-5p	1.58545	3.14065	1.98092	2.44707	0.580228	1.53088	0.243373	-0.000805028	0.0823667	0.900599	0.997856	0.548223	0	12.2148	0.71459	1.63483	0	2.01708	1.43353	0	0	0	1.00902	1.03882
dme-mir-4980-3p	1.5714	3.23097	2.05611	1.09645	2.12552	1.01511	1.50735	0.000142052	0.0823797	0.929001	0.997856	7.67512	0	0	0	0	0	0	0	0	2.66291	0	10.0902	0
miR-96-5p	1.56786	3.51134	2.23957	1.75858	1.34536	1.46686	1.22814	-0.000555121	0.0823944	0.67725	0.997856	0	0	0	0	1.08989	11.2202	0	0	0	0	0	8.07215	0
hsa-mir-6127-5p	1.55838	4.29784	2.75788	2.74198	0.177527	2.10895	0.162059	-0.00117936	0.0823957	0.662637	0.997856	2.19289	16.2864	0	0.71459	0	0	0	0	0	1.06516	0	0	0
miR-2412-5p	1.55144	2.5671	1.65465	2.22834	0.761731	1.18366	0.52888	-0.000832117	0.0823809	0.799051	0.997856	0	0.708102	6.10738	0.71459	0	0	8.0683	0	0	0	0	3.53157	1.03882
pma-mir-30f-2-3p	1.5432	2.58184	1.67304	1.6367	1.43412	0.825873	1.21453	8.37215e-05	0.0823925	0.623367	0.997856	0	0	6.10738	2.14377	0	3.20577	0	0	0	0.532582	0	8.07215	0
hsa-mir-5192-3p	1.5168	2.4707	1.62889	2.36042	0.532582	1.10706	0.486178	-0.000128685	0.0823922	0.709729	0.997856	0	0	6.10738	7.1459	3.26966	0	0	0	0	3.19549	0	0	0
dre-mir-16c-5p	1.51115	2.25735	1.4938	2.04264	0.891064	1.11388	0.17971	-0.00357634	0.0824307	0.481516	0.997856	1.64467	0	0	1.42918	0.544943	1.60288	9.07684	1.43353	0	1.06516	0.799853	1.00902	1.03882
ggo-mir-629-5p	1.50501	2.78119	1.84796	1.51289	1.49581	1.19477	0.922082	0.000826716	0.0823923	0.364557	0.997856	0	0	9.16108	1.42918	0	0	0	0	0	5.8584	0	0	3.11645
rno-mir-151-3p	1.50059	1.46127	0.9738	1.56338	1.42733	0.677479	0.380404	0.00143782	0.0823721	0.360951	0.997856	0	0.708102	3.05369	5.00213	2.17977	0	0	1.43353	0	2.13033	0.399927	2.52255	2.07763
hsa-mir-6773-5p	1.49558	2.73532	1.82894	1.78842	1.15393	1.06923	1.05339	-5.53755e-06	0.0823909	0.731385	0.997856	0	0	6.10738	0	0	6.41154	0	0	0	6.92356	0	0	0
miR-2285cw-2-3p	1.48753	3.70443	2.49032	2.64829	0.133309	1.79244	0.121694	-0.00182423	0.0824235	0.370086	0.997856	13.7056	0	0	4.28754	0.544943	0	0	0	0	0	0.799853	0	0
rno-mir-6320-3p	1.48084	1.55188	1.04797	1.89109	1.00222	0.720598	0.30332	-0.000819685	0.0823425	0.913958	0.997856	0	1.4162	0	3.57295	0	3.20577	5.04269	1.43353	0	1.59774	0.399927	0.504509	2.07763
miR-2447-5p	1.47311	2.34271	1.59032	2.35536	0.443818	1.04621	0.405149	-0.00123419	0.0823971	0.578458	0.997856	4.38578	0	6.10738	0	5.99437	0	0	0	0	2.66291	0	0	0
oni-mir-124b-1-3p;oni-mir-124b-2-3p;mmu-mir-124b-3p	1.46843	4.05463	2.7612	2.72709	0	1.96756	0	-0.00173114	0.0824197	0.544337	0.997856	1.09645	0	15.2685	0	2.72471	0	0	0	0	0	0	0	0
eca-mir-9082-3p	1.46746	2.68083	1.82684	1.81229	1.06516	1.0841	0.972356	-0.000698049	0.082383	0.844841	0.997856	6.57867	0	6.10738	0	0	0	0	0	0	6.39098	0	0	0
hsa-mir-6782-5p	1.46677	3.36927	2.29706	2.64792	0.0887636	1.60471	0.0810297	-0.000492753	0.0823929	0.96466	0.997856	0	1.4162	12.2148	0	4.90448	0	0	0	0	0.532582	0	0	0
dpu-mir-100-5p	1.45157	2.44651	1.68543	1.09176	1.87134	0.730689	1.1748	-0.000449531	0.0823848	0.880619	0.997856	2.19289	0	0	0	5.44943	0	0	0.716767	0	7.98872	0	2.52255	0
ola-mir-92a-2-3p	1.44183	2.65725	1.84297	1.97715	0.817284	1.21089	0.658275	-0.00075185	0.0823919	0.676971	0.997856	0	2.12431	0	0	1.08989	9.61731	1.00854	0	0	0	4.39919	0.504509	0
miR-24-1-3p;miR-24-2-3p;miR-11977-3p	1.43985	3.34952	2.32629	2.67401	0	1.58275	0	-0.00105359	0.0824034	0.920085	0.997856	0	0	12.2148	2.14377	4.35954	0	0	0	0	0	0	0	0
miR-2285dk-5p	1.42069	2.15306	1.51551	1.34021	1.51458	0.765095	0.935153	1.67769e-05	0.0823715	0.867056	0.997856	0.548223	2.12431	0	0.71459	5.99437	0	0	6.4509	0	1.59774	0	0	1.03882
gga-mir-7450-5p	1.41978	3.77404	2.65819	0.144077	2.9081	0.133389	2.10561	0.000302859	0.08239	0.608773	0.997856	0	0	0	0	0	0	1.00854	14.3353	0	0	1.59971	1.51353	0
pma-mir-30e-5p	1.41701	0.869741	0.613785	1.75757	1.01969	0.351261	0.237403	-0.00133856	0.0823062	0.864817	0.997856	1.64467	1.4162	3.05369	1.42918	0.544943	3.20577	1.00854	1.43353	0	0.532582	1.59971	1.51353	1.03882
miR-542-3p	1.41599	3.10755	2.19461	0.256855	2.76832	0.158271	1.69914	0.000470705	0.0823938	0.430166	0.997856	0	0.708102	0	0	1.08989	0	0	10.7515	0	5.8584	0	0	0
miR-6522-5p	1.41065	3.45556	2.44962	1.95085	0.780419	1.72351	0.381941	-0.00161166	0.0824104	0.536946	0.997856	0	0	0	0	0.544943	0	13.111	2.1503	0	0.532582	1.99963	0	0
pte-mir-125a-5p	1.40769	1.28603	0.913571	1.18458	1.66799	0.399773	0.598938	0.00221322	0.0823549	0.524141	0.997856	0.548223	2.83241	0	0.71459	2.17977	0	2.01708	0	0	2.13033	1.19978	2.52255	4.15527
miR-18b-5p	1.40373	1.69246	1.20569	1.19659	1.64539	0.399845	0.893697	0.000900696	0.0823511	0.66817	0.997856	1.64467	2.12431	3.05369	0	0.544943	0	1.00854	1.43353	0	6.39098	0	1.00902	1.03882
ami-mir-497-5p	1.38788	4.02936	2.90325	2.46323	0.133309	1.9846	0.121694	-0.000131022	0.0823934	0.734903	0.997856	0	0	15.2685	1.42918	0.544943	0	0	0	0	0	0.799853	0	0
bbe-mir-200a-3p	1.37169	1.36418	0.994528	0.973542	1.8362	0.379166	0.639969	0.00211998	0.0823597	0.53244	0.997856	1.09645	0.708102	0	0.71459	1.08989	3.20577	0	0	0	1.06516	2.79949	4.03608	3.11645
miR-2285cy-3p	1.35999	2.59199	1.90589	2.08815	0.510472	1.22566	0.397476	-0.000538902	0.0823854	0.895037	0.997856	1.09645	0	9.16108	0	4.35954	0	0	0	0	2.66291	0.399927	0	0
miR-129-2-3p	1.35886	1.79111	1.3181	0.919807	1.87109	0.559345	0.8071	-1.89939e-05	0.0823824	0.796778	0.997856	0.548223	0	0	4.28754	0	1.60288	0	2.1503	0	5.8584	1.19978	2.01804	0
cja-mir-16-2-5p	1.35508	1.20468	0.889009	1.98822	0.616413	0.461521	0.255456	-0.0024534	0.0824014	0.482398	0.997856	1.09645	2.12431	3.05369	1.42918	2.17977	0	4.03415	1.43353	0	1.06516	1.19978	0	0
ppc-mir-8342-3p	1.3546	2.46989	1.82334	1.07813	1.67715	0.495519	1.35518	0.000267549	0.0823928	0.436742	0.997856	0	0	3.05369	2.85836	1.63483	0	0	0	0	9.05389	0	1.00902	0
oan-mir-1353-5p	1.34519	2.31038	1.71751	1.58522	1.06516	0.838868	0.972356	0.000330447	0.0823946	0.414962	0.997856	0	1.4162	6.10738	3.57295	0	0	0	0	0	6.39098	0	0	0
mmu-mir-140-3p_ssc-mir-140_stem-loop_mdo-mir-140_stem-loop	1.34506	2.09588	1.5582	2.06554	0.504509	0.921363	0.460552	-0.00120115	0.0823977	0.567158	0.997856	3.83756	0	0	5.71672	4.90448	0	0	0	0	0	0	3.02706	0
cli-mir-146b-5p	1.33625	2.97544	2.22671	2.1052	0.439139	1.44624	0.317794	-0.0013494	0.0824022	0.537486	0.997856	3.83756	0	0	0	10.8989	0	0	0	0	2.13033	0	0.504509	0
miR-376a-3p	1.32192	2.4435	1.84846	1.55979	1.0444	1.0301	0.829446	-0.000901848	0.0823921	0.686815	0.997856	3.28934	0	0	0	7.6292	0	0	0.716767	0	0	0	5.5496	0
miR-2284b-5p	1.32178	2.22656	1.68451	1.73927	0.834714	0.999725	0.597024	-0.00111128	0.0823939	0.58912	0.997856	1.09645	0	0	1.42918	1.63483	8.01442	0	0	0	0	3.99927	1.00902	0
miR-2285ag-5p	1.31694	2.14009	1.62505	1.90621	0.629452	1.0363	0.214165	-0.000804687	0.0823776	0.877169	0.997856	0	0.708102	0	2.85836	8.17414	1.60288	0	1.43353	0	0	0.799853	0.504509	1.03882
miR-150-3p	1.31074	2.06215	1.57327	1.27681	1.35032	0.557653	1.05444	8.2017e-05	0.0823827	0.836863	0.997856	0	0	3.05369	2.85836	0	0	3.02561	0	0	0	0	7.06313	1.03882
ola-mir-21-1-5p	1.31046	1.59339	1.2159	1.26313	1.36568	0.782779	0.286124	0.00101202	0.0823469	0.650943	0.997856	1.64467	0	6.10738	0	1.08989	0	0	1.43353	0	1.06516	1.59971	2.01804	2.07763
miR-141-3p	1.28085	2.76368	2.15769	1.02818	1.57564	0.796522	1.36664	0.000453966	0.0823953	0.378131	0.997856	0	0	6.10738	0	1.08989	0	0	0	0	9.05389	0.399927	0	0
miR-129-2-5p;miR-129-1-5p	1.2792	2.73196	2.13569	2.37565	0	1.26808	0	-0.00139692	0.082411	0.580719	0.997856	0	0	0	4.28754	2.72471	9.61731	0	0	0	0	0	0	0
eca-mir-483-5p	1.27852	3.20367	2.50576	1.97851	0.461863	1.59381	0.205639	0.000188746	0.0823884	0.610912	0.997856	0	0	12.2148	0	1.63483	0	0	0	0	0.532582	1.19978	0	1.03882
miR-205-5p	1.27707	2.31926	1.81609	1.30653	1.24269	0.693777	1.13442	0.000183346	0.082393	0.489928	0.997856	0	0	3.05369	5.00213	1.08989	0	0	0	0	7.45614	0	0	0
miR-2900-3p	1.2728	2.69314	2.11591	1.60294	0.887636	1.18665	0.810297	-0.000964855	0.0823935	0.682198	0.997856	0	0	0	2.14377	0	0	9.07684	0	0	5.32582	0	0	0
gmo-mir-27c-3p	1.26963	1.02657	0.808559	1.66618	0.80698	0.453088	0.186766	-0.00112686	0.0823338	0.876568	0.997856	1.64467	2.12431	3.05369	0	1.63483	3.20577	0	1.43353	0	1.06516	0.799853	0.504509	1.03882
ppc-mir-2264-3p	1.26956	2.33098	1.83605	1.67301	0.798872	1.00021	0.729267	-0.000281197	0.0823924	0.93203	0.997856	0	0	0	5.71672	5.99437	0	0	0	0	4.79323	0	0	0
hsa-mir-4537-3p	1.26226	2.12519	1.68363	1.48499	1.00242	0.906291	0.701473	0.00023763	0.0823939	0.453208	0.997856	0	0	6.10738	4.28754	0	0	0	0.716767	0	4.79323	0	0.504509	0
miR-181a-1-5p	1.24983	1.67338	1.33889	1.88779	0.50554	0.744359	0.29253	-0.00138485	0.0823874	0.63069	0.997856	1.64467	4.95672	0	0.71459	1.08989	4.80865	0	1.43353	0	0	1.59971	0	0
eca-mir-9075-5p	1.22821	1.96698	1.6015	2.06049	0.257221	0.890481	0.161305	-0.00178558	0.0824079	0.558609	0.997856	0	0.708102	0	0	3.26966	6.41154	4.03415	0	0	0	0	0.504509	1.03882
mdo-mir-12399-5p	1.20939	1.64758	1.36232	1.43934	0.941117	0.719845	0.502668	-0.000509579	0.0823625	0.864691	0.997856	3.83756	0	0	1.42918	0	4.80865	0	0	0	2.13033	0.399927	0	3.11645
miR-2284y-1-5p;miR-2284y-7-5p;miR-2284y-2-5p	1.20249	1.14483	0.952049	1.67447	0.651854	0.467864	0.285474	-0.00252138	0.082395	0.516835	0.997856	3.83756	0.708102	3.05369	1.42918	1.08989	1.60288	0	0	0	1.59774	0.799853	1.51353	0
miR-7859-5p	1.17858	2.51319	2.1324	1.16773	1.19122	1.08111	0.830609	-0.000399628	0.0823928	0.836634	0.997856	0	0	0	0	8.17414	0	0	0	0	1.59774	0	5.5496	0
miR-2426-5p	1.17334	2.07245	1.76629	2.12192	0.0666544	0.926428	0.0608469	-0.00147542	0.0824103	0.449992	0.997856	0	0	0	5.00213	0	4.80865	5.04269	0	0	0	0.399927	0	0
hsa-mir-122b-5p;mdo-mir-122b-5p;gga-mir-122b-1-5p_gga-mir-122b-2_stem-loop	1.17028	2.42138	2.06907	0.311396	2.1723	0.288296	1.30127	0.000217725	0.08239	0.608318	0.997856	0	0	0	0	2.17977	0	0	0	0	7.98872	0	5.04509	0
miR-2285o-5-3p;miR-2285o-4-3p	1.16574	2.35898	2.02359	1.02084	1.33478	0.945116	0.88592	6.85486e-05	0.0823931	0.562977	0.997856	0	0	0	7.1459	0	0	0	2.1503	0	5.8584	0	0	0
oan-mir-30c-1-3p	1.15737	3.0491	2.63449	1.78905	0.420425	1.49493	0.383793	-0.000296752	0.082394	0.807773	0.997856	0	0	0	11.4334	1.08989	0	0	0	0	0	0	2.52255	0
miR-218-1-5p	1.15297	2.27548	1.97358	1.32437	0.953006	1.06657	0.555905	-0.000619431	0.0823903	0.758555	0.997856	1.09645	0	0	0	8.17414	0	0	0	0	3.19549	0	2.52255	0
miR-411-3p	1.15182	2.3242	2.01785	1.31993	0.95569	0.930175	0.872421	-0.00110458	0.082399	0.66722	0.997856	0	0	0	0	2.17977	0	7.05976	5.73414	0	0	0	0	0
miR-2285cj-5p	1.14689	1.80246	1.57161	1.3691	0.887636	0.603548	0.810297	-0.000675372	0.0823865	0.77784	0.997856	2.74111	0	0	3.57295	3.26966	0	0	0	0	5.32582	0	0	0
gga-mir-6566-3p	1.14533	2.37456	2.07325	2.12704	0	1.09436	0	-0.00116467	0.0824056	0.823208	0.997856	0	2.12431	0	7.86049	4.90448	0	0	0	0	0	0	0	0
eca-mir-8991-5p	1.14467	2.15077	1.87895	1.0796	1.22058	0.653326	1.04292	-4.74869e-05	0.0823917	0.749599	0.997856	0	0	0	4.28754	3.26966	0	0	0	0	6.92356	0.399927	0	0
eca-mir-3548-3p;rno-mir-3548-3p	1.13313	2.47614	2.18522	1.80005	0.355054	1.1882	0.324119	-2.33269e-05	0.0823917	0.678224	0.997856	0	0	9.16108	0.71459	2.72471	0	0	0	0	2.13033	0	0	0
tch-mir-27a-3p	1.11971	2.2109	1.97453	0.732927	1.57096	0.249756	1.2717	-9.83181e-05	0.0823834	0.811812	0.997856	0	0	0	1.42918	1.08989	1.60288	1.00854	0	0	8.52131	0.399927	0.504509	0
eca-mir-9045-5p	1.11823	2.25704	2.01841	1.78842	0.33634	1.06923	0.307035	-0.000398989	0.0823925	0.950441	0.997856	0	0	6.10738	0	0	6.41154	0	0	0	0	0	2.01804	0
eca-mir-9056-3p	1.11662	2.1076	1.88748	1.16073	1.06516	0.695156	0.972356	-0.000539762	0.0823833	0.851748	0.997856	3.83756	0	0	4.28754	0	0	0	0	0	6.39098	0	0	0
efu-mir-4667-5p	1.10233	2.36194	2.14268	1.5146	0.621345	1.09138	0.567208	-0.00018056	0.0823831	0.933941	0.997856	1.09645	8.49723	0	0	0	0	1.00854	0	0	3.72807	0	0	0
cel-mir-5545-5p	1.09614	2.05153	1.87159	1.42647	0.710763	0.955321	0.481309	-0.0010828	0.0823927	0.718901	0.997856	7.1269	0	0	2.85836	0	0	0	0	0	1.06516	3.19941	0	0
miR-2284y-1-3p	1.08468	1.27116	1.17192	1.638	0.439139	0.509637	0.317794	-0.000362085	0.0823761	0.923166	0.997856	0.548223	3.54051	3.05369	2.14377	2.17977	0	0	0	0	2.13033	0	0.504509	0
miR-449d-5p	1.06921	2.056	1.92292	1.98568	0	0.928179	0	-0.00191545	0.0824287	0.363322	0.997856	4.93401	0	6.10738	2.85836	0	0	0	0	0	0	0	0	0
hsa-mir-6890-5p	1.06622	2.4428	2.29109	1.68331	0.346272	1.17978	0.316102	-0.00153717	0.0824067	0.66304	0.997856	1.09645	0.708102	0	0.71459	9.26402	0	0	0	0	0	0	0	2.07763
miR-653-3p	1.06171	2.23642	2.10644	0.982658	1.15393	0.713993	1.05339	-0.000168504	0.0823911	0.897583	0.997856	0	0	0	1.42918	5.44943	0	0	0	0	6.92356	0	0	0
eca-mir-9101-5p	1.05959	2.42498	2.2886	1.51104	0.532909	1.19479	0.307675	0.000305612	0.0823951	0.46246	0.997856	0	1.4162	9.16108	0	0	0	0	0	0	1.59774	1.59971	0	0
rno-mir-211-5p	1.0582	0.897097	0.847757	1.01897	1.10397	0.367445	0.325877	0.000507401	0.0823297	0.745329	0.997856	1.09645	0	3.05369	1.42918	0.544943	0	1.00854	2.1503	0	2.13033	0.799853	0.504509	1.03882
hsa-mir-1229-5p	1.05246	1.813	1.72263	1.72603	0.266618	0.829515	0.243388	-0.00128665	0.0823984	0.60035	0.997856	3.83756	0.708102	6.10738	1.42918	0	0	0	0	0	0	1.59971	0	0
miR-3432a-2-5p;miR-3432b-5p	1.03061	2.74251	2.66105	1.48803	0.496952	1.37765	0.211216	-0.0009957	0.0823956	0.767059	0.997856	10.4162	0	0	0	0	0	0	0.716767	0	1.06516	1.19978	0	0
ggo-mir-4738-3p	1.02945	2.15437	2.09273	1.79757	0.133309	1.01875	0.121694	-0.00154445	0.0824122	0.45463	0.997856	0	0	0	0.71459	0	4.80865	7.05976	0	0	0	0.799853	0	0
miR-2285cd-5p;miR-2285cz-5p	1.01878	1.60238	1.57284	1.63361	0.301479	0.735864	0.175796	-0.000453266	0.0823935	0.972542	0.997856	0	0	3.05369	3.57295	0	4.80865	0	0	0	0	0.799853	1.00902	0
ssa-mir-15c-2-3p	1.01108	0.693173	0.685578	1.21634	0.771603	0.312796	0.150289	-0.000574493	0.0823154	0.976937	0.997856	1.09645	2.83241	0	1.42918	0.544943	1.60288	1.00854	0.716767	0	1.06516	0.799853	1.00902	1.03882
miR-2411-5p	1.00651	2.48163	2.46559	1.71706	0.177527	1.20761	0.162059	-7.02406e-06	0.0823925	0.687465	0.997856	0	0	9.16108	2.85836	0	0	0	0	0	1.06516	0	0	0
miR-655-3p	1.00166	1.84402	1.84096	1.32765	0.621345	0.795542	0.567208	-0.00109928	0.0823934	0.716707	0.997856	4.93401	0	0	0	4.35954	0	0	0	0	3.72807	0	0	0
pma-mir-30c-5p	0.992287	1.61125	1.62377	1.23096	0.71383	0.77323	0.315753	0.000232795	0.082381	0.646024	0.997856	0.548223	1.4162	6.10738	0	0.544943	0	0	0	0	1.06516	1.19978	2.01804	0
tgu-mir-2962-5p	0.982358	1.64412	1.67365	0.408337	1.65205	0.378047	0.801739	0.000710294	0.0823876	0.454302	0.997856	0	0	0	2.85836	0	0	0	5.73414	0	2.13033	0	1.00902	1.03882
ppy-mir-648-5p	0.975678	2.25019	2.30629	1.81197	0	1.06154	0	-0.00181633	0.0824237	0.44461	0.997856	1.09645	0	0	3.57295	0	8.01442	0	0	0	0	0	0	0
mmu-mir-7047-5p	0.967194	2.16277	2.23613	1.56797	0.266291	1.04205	0.243089	-0.0015544	0.0824105	0.549575	0.997856	2.19289	0	0	0.71459	0	0	8.0683	0	0	1.59774	0	0	0
cgr-mir-1249-5p	0.932337	1.98829	2.13259	1.27498	0.532582	0.915879	0.486178	-0.00108072	0.0823917	0.746959	0.997856	7.1269	0.708102	0	0	1.08989	0	0	0	0	3.19549	0	0	0
cja-mir-934-5p	0.922041	1.09913	1.19207	0.75821	1.11318	0.400699	0.454322	-0.000989898	0.0823807	0.916596	0.997856	0.548223	0	0	0	0.544943	3.20577	1.00854	1.43353	0	0.532582	3.19941	1.51353	0
hsa-mir-6766-3p	0.920178	1.80692	1.96366	1.32849	0.443818	0.833073	0.405149	-0.000528777	0.0823926	0.884362	0.997856	0	0.708102	0	0	2.17977	6.41154	0	0	0	2.66291	0	0	0
miR-2285ac	0.910438	1.82219	2.00144	1.33045	0.420425	0.847402	0.383793	-0.000114367	0.0823918	0.717114	0.997856	0	0	6.10738	0	0	3.20577	0	0	0	0	0	2.52255	0
let-7a-2-5p;let-7c-5p;let-7a-3-5p	0.90784	1.44975	1.59692	1.49564	0.222072	0.661711	0.132026	-0.000979964	0.0823928	0.786093	0.997856	0	0.708102	0	5.00213	0.544943	3.20577	1.00854	0	0	0.532582	0.799853	0	0
hsa-mir-4763-5p	0.895815	1.8176	2.02899	1.51951	0.16817	0.859515	0.153517	-0.000383549	0.0823927	0.890115	0.997856	0	0	6.10738	0.71459	3.8146	0	0	0	0	0	0	1.00902	0
miR-2284x-5p;miR-2284h-5p	0.895053	0.875052	0.977654	0.769267	1.0418	0.409766	0.203227	2.9223e-05	0.0823377	0.915296	0.997856	1.64467	0	0	0.71459	0	0	3.02561	1.43353	0	1.06516	1.19978	1.51353	1.03882
miR-2285au-5p;miR-2285ao-3-5p;miR-2284y-1-5p	0.890715	1.05018	1.17903	1.30124	0.411771	0.456372	0.209222	-0.000524	0.0823883	0.976779	0.997856	0	2.12431	0	2.14377	1.63483	3.20577	0	1.43353	0	0.532582	0	0.504509	0
cli-mir-223-3p	0.88784	1.64685	1.85489	1.05149	0.696915	0.78713	0.353242	0.000374934	0.0823935	0.431945	0.997856	0	0.708102	6.10738	0	0.544943	0	0	0.716767	0	1.06516	2.39956	0	0
eca-mir-9128-1-5p	0.883951	1.8959	2.1448	1.64162	0	0.880872	0	-0.00169364	0.0824183	0.579826	0.997856	1.09645	0	6.10738	4.28754	0	0	0	0	0	0	0	0	0
prv-mir-LLT10a-5p_prv-mir-LLT10b_stem-loop	0.882952	1.95591	2.21519	0.612505	1.19847	0.56707	0.955487	0.000204643	0.0823929	0.484235	0.997856	0	0	0	4.28754	0	0	0	0	0	6.39098	0.799853	0	0
sko-mir-375-3p	0.86283	0.797898	0.924746	0.899329	0.820247	0.315158	0.306831	-0.000155426	0.0823541	0.914915	0.997856	1.09645	1.4162	0	0	2.17977	1.60288	0	2.1503	0	0.532582	1.19978	0	1.03882
mmu-mir-6922-5p	0.856511	1.66184	1.94024	1.59066	0	0.752244	0	-0.00161378	0.0824156	0.592348	0.997856	0	4.95672	0	2.14377	0	0	4.03415	0	0	0	0	0	0
ggo-mir-339-5p	0.84163	1.58575	1.88414	0.43223	1.31926	0.400168	0.787068	0.00113002	0.0823858	0.642473	0.997856	0	0	0	0	0	0	3.02561	0	0	0	4.79912	0	3.11645
eca-mir-9153-5p	0.829497	1.57042	1.89322	1.09529	0.519409	0.683565	0.474153	-0.000693893	0.0823857	0.942099	0.997856	0	0	0	2.85836	0	4.80865	0	0	0	0	0	0	3.11645
miR-133a-2-3p	0.827744	1.2252	1.48016	0.965915	0.666544	0.346892	0.608469	-0.000605034	0.0823856	0.844103	0.997856	2.19289	1.4162	0	2.14377	0	0	1.00854	0	0	0	3.99927	0	0
gga-mir-6661-5p	0.827589	0.83369	1.00737	0.837643	0.815861	0.365044	0.263754	-8.3576e-06	0.0823645	0.774683	0.997856	0.548223	0.708102	3.05369	0	0.544943	0	1.00854	0.716767	0	1.06516	1.59971	1.51353	0
mmu-mir-6955-5p	0.821631	1.7507	2.13076	0.864461	0.771663	0.800335	0.483915	-0.000102036	0.0823707	0.962481	0.997856	0	0	0	0	0	0	6.05123	0	0	0	0	1.51353	3.11645
miR-2285db-3p	0.811574	1.6191	1.99502	1.13028	0.439754	0.783257	0.262356	-0.000253499	0.0823783	0.947953	0.997856	1.09645	0.708102	6.10738	0	0	0	0	0	0	0	1.59971	0	1.03882
ame-mir-2788-3p	0.806581	1.04688	1.29793	0.360804	1.32666	0.218225	0.497219	0.00135287	0.0823854	0.58724	0.997856	1.09645	0	0	1.42918	0	0	0	2.1503	0	0.532582	3.19941	0	2.07763
pbv-mir-30b-5p	0.803197	0.98207	1.2227	1.16101	0.385752	0.414594	0.245725	-0.00181722	0.0824049	0.595572	0.997856	1.64467	0	0	0.71459	0.544943	3.20577	2.01708	0.716767	0	1.59774	0	0	0
mmu-mir-6516-3p	0.796074	1.7129	2.15169	1.09801	0.443818	0.793477	0.405149	-0.00112719	0.0823976	0.703281	0.997856	0	0	0	0	1.63483	0	6.05123	0	0	2.66291	0	0	0
pxy-mir-8515-2-3p	0.770727	1.8838	2.44418	1.16492	0.310836	0.93221	0.182165	-0.000402022	0.082392	0.92675	0.997856	0	0	0	7.1459	0	0	1.00854	0	0	1.06516	0.799853	0	0
mml-mir-7167-5p	0.760649	1.06709	1.40287	1.2263	0.217394	0.471725	0.130249	-0.00197531	0.0824147	0.513237	0.997856	0.548223	0	0	0.71459	1.08989	3.20577	3.02561	0	0	0	0.799853	0.504509	0
miR-26a-1-5p;miR-26b-5p	0.757343	1.34158	1.77143	0.806016	0.700558	0.643622	0.291723	9.20169e-05	0.0823672	0.971798	0.997856	4.93401	0.708102	0	0	0	0	0	0.716767	0	0	0.399927	1.00902	2.07763
hme-mir-6304-3p	0.742185	0.98042	1.32099	1.30627	0.0840849	0.39013	0.0767587	-0.00141427	0.0824007	0.641425	0.997856	0.548223	2.12431	0	2.14377	2.72471	1.60288	0	0	0	0	0	0.504509	0
miR-2285dc-5p	0.724329	1.20017	1.65694	1.2691	0.0887636	0.534292	0.0810297	-0.00144055	0.0824067	0.570108	0.997856	1.09645	0	0	3.57295	0	3.20577	1.00854	0	0	0.532582	0	0	0
miR-2285au-5p;miR-2284x-5p	0.71835	0.840697	1.17032	1.07166	0.306157	0.369205	0.130761	-0.0014632	0.0823845	0.72974	0.997856	1.09645	0.708102	3.05369	0	1.63483	0	1.00854	0	0	0.532582	0.799853	0.504509	0
hsa-mir-12118-5p	0.716526	1.03479	1.44417	1.14435	0.217394	0.463646	0.130249	-0.000503691	0.0823906	0.949274	0.997856	0	0	3.05369	2.85836	1.08989	0	1.00854	0	0	0	0.799853	0.504509	0
xtr-let-7e-1-5p	0.702519	0.925622	1.31757	0.384681	1.07333	0.235659	0.437312	0.0013822	0.0823895	0.466774	0.997856	0	0	0	0	1.08989	1.60288	0	0.716767	0	1.59774	0	1.00902	3.11645
tca-mir-3875-5p	0.678659	0.870454	1.28261	0.435862	0.961922	0.261412	0.394666	0.000252916	0.0823909	0.507713	0.997856	0	1.4162	0	0	1.63483	0	0	0.716767	0	0.532582	1.99963	2.52255	0
hsa-mir-203a-3p	0.660816	1.32128	1.99947	1.22723	0	0.603213	0	-0.00180462	0.0824235	0.489665	0.997856	1.64467	0.708102	0	1.42918	0	4.80865	0	0	0	0	0	0	0
pma-let-7d-5p	0.651581	0.515059	0.790475	0.708233	0.585488	0.205289	0.19257	-0.000113758	0.0823456	0.878661	0.997856	0.548223	0.708102	0	0	1.08989	1.60288	1.00854	0	0	1.06516	0.399927	1.00902	1.03882
miR-2285cw-1-5p	0.646429	0.846178	1.309	0.401859	0.93176	0.179864	0.435119	0.00151371	0.0823816	0.51228	0.997856	0	0	0	0.71459	1.08989	0	1.00854	0	0	1.06516	0.399927	1.00902	3.11645
cte-mir-100-5p	0.643957	0.721804	1.12089	0.640509	0.647979	0.314821	0.23072	7.25558e-05	0.0823636	0.873424	0.997856	1.64467	2.12431	0	0.71459	0	0	0	0.716767	0	0.532582	1.59971	0	1.03882
mmu-mir-146a-5p	0.621316	0.831762	1.33871	0.492745	0.771316	0.35901	0.259674	-0.000244763	0.0823765	0.953404	0.997856	2.74111	0.708102	0	0	0	0	0	0.716767	0	1.59774	0.799853	1.51353	0
miR-2285cs-3p	0.600125	1.28974	2.14913	0.391588	0.843418	0.36254	0.63519	0.000255995	0.0823817	0.875449	0.997856	2.74111	0	0	0	0	0	0	0	0	4.26065	0.799853	0	0
miR-2285bd-3p	0.589076	1.18024	2.00355	0.847458	0.287631	0.57251	0.169598	-0.000914297	0.0823917	0.768436	0.997856	1.64467	0	0	4.28754	0	0	0	0.716767	0	0	0	1.00902	0
miR-2284f-5p	0.578003	0.498678	0.86276	0.526325	0.638294	0.196462	0.190107	0.000779381	0.0823718	0.545186	0.997856	0	1.4162	0	0.71459	0.544943	0	1.00854	0.716767	0	1.06516	0	1.00902	1.03882
pal-mir-200b-3p;cpo-mir-200b-3p	0.576867	0.661064	1.14595	0.485839	0.683067	0.230626	0.286219	-6.95371e-05	0.0823897	0.672601	0.997856	0	0.708102	0	0	1.08989	1.60288	0	1.43353	0	1.06516	1.59971	0	0
pbv-mir-16a-5p	0.569476	0.603434	1.05963	0.563577	0.576358	0.266165	0.187221	-0.000230551	0.0823778	0.839087	0.997856	0.548223	0.708102	0	2.14377	0.544943	0	0	0.716767	0	0.532582	1.19978	1.00902	0
hsa-mir-6858-5p	0.566651	0.890378	1.5713	0.43223	0.723475	0.400168	0.246387	0.000404017	0.0823736	0.824091	0.997856	0	0	0	0	0	0	3.02561	0	0	1.59774	1.19978	0.504509	1.03882
mmr-mir-186-5p	0.553693	0.574773	1.03807	0.503943	0.611734	0.22451	0.22282	-0.00042846	0.0823873	0.932435	0.997856	0	0	0	1.42918	1.08989	0	1.00854	1.43353	0	0.532582	1.19978	0.504509	0
sha-mir-21-3p	0.550422	0.733828	1.33321	0.874056	0.172849	0.32113	0.099849	-0.00116033	0.082394	0.721787	0.997856	1.64467	2.12431	0	0.71459	1.63483	0	0	0	0	0.532582	0	0.504509	0
hsa-mir-4640-5p	0.541208	1.13304	2.09353	0.510421	0.577127	0.472558	0.39904	8.61926e-05	0.0823923	0.595257	0.997856	0	0	0	3.57295	0	0	0	0	0	2.66291	0.799853	0	0
mdo-mir-12387-5p	0.522864	0.718395	1.37396	0.389311	0.678676	0.267607	0.285269	0.000414583	0.0823778	0.717769	0.997856	0	0.708102	0	0	0	0	2.01708	1.43353	0	0	1.59971	0	1.03882
spu-mir-2013-3p	0.511952	0.716865	1.40026	0.406483	0.634999	0.242924	0.31712	0.000962903	0.0823901	0.517068	0.997856	0	1.4162	0	1.42918	0	0	0	0	0	0.532582	1.19978	0	2.07763
pma-mir-375a-3p	0.511916	0.931237	1.81912	0.950702	0	0.412893	0	-0.0017781	0.0824226	0.518647	0.997856	1.64467	0	0	0.71459	1.08989	3.20577	0	0	0	0	0	0	0
mmu-mir-709-3p	0.511161	0.588365	1.15104	0.424709	0.612022	0.205073	0.254199	0.000334093	0.0823775	0.777154	0.997856	0.548223	1.4162	0	0	0	0	1.00854	1.43353	0	0	1.19978	0	1.03882
eca-mir-8944-3p	0.4815	0.957257	1.98807	0.437715	0.532582	0.262408	0.486178	-3.30545e-05	0.0823906	0.673405	0.997856	0	0	0	1.42918	1.63483	0	0	0	0	3.19549	0	0	0
hsa-mir-4512-5p	0.477242	0.971396	2.03544	0	1.03402	0	0.494766	0.00101591	0.0824036	0.410975	0.997856	0	0	0	0	0	0	0	0	0	3.19549	1.99963	1.00902	0
ppy-mir-151b-3p	0.474742	0.561994	1.18379	0.707195	0.203546	0.237618	0.12015	-0.000907809	0.0823916	0.794961	0.997856	1.09645	1.4162	0	1.42918	0	0	1.00854	0.716767	0	0	0	0.504509	0
hsa-mir-12115-5p	0.430974	0.739632	1.71619	0.389311	0.479581	0.267607	0.315187	0.000313802	0.0823735	0.747844	0.997856	0	0.708102	0	0	0	0	2.01708	0	0	0	0.799853	0	2.07763
mle-mir-100-5p	0.429932	0.648198	1.50768	0.612108	0.217394	0.297884	0.130249	-0.00109562	0.0823963	0.77305	0.997856	1.09645	0	0	0	2.17977	0	1.00854	0	0	0	0.799853	0.504509	0
ssa-mir-27a-1-3p	0.420317	0.651387	1.54975	0.366003	0.483685	0.264492	0.238245	-0.000507805	0.0823875	0.971996	0.997856	0	0	0	0	0.544943	0	2.01708	0	0	1.59774	0.799853	0.504509	0
mmu-mir-7024-5p	0.396496	0.677566	1.70889	0.664276	0.0840849	0.30867	0.0767587	-0.00108272	0.0823954	0.776012	0.997856	1.09645	2.12431	0	1.42918	0	0	0	0	0	0	0	0.504509	0
cin-mir-200-3p	0.381897	0.599593	1.57004	0.390182	0.372231	0.239436	0.227514	-0.000697799	0.0823891	0.941349	0.997856	1.09645	0	0	0	1.63483	0	0	1.43353	0	0	0.799853	0	0
nve-mir-100-5p;api-mir-100-5p	0.363624	0.52346	1.43956	0.280164	0.460995	0.189153	0.21752	0.000283468	0.082393	0.570892	0.997856	0	1.4162	0	0	0.544943	0	0	1.43353	0	0.532582	0.799853	0	0
bma-mir-100a-5p	0.321763	0.515244	1.60132	0.282017	0.368133	0.190744	0.213727	-4.66644e-05	0.0823915	0.701184	0.997856	0	0	0	1.42918	0.544943	0	0	0	0	0	1.19978	1.00902	0
gga-mir-1579-5p	0.3132	0.480419	1.53391	0.155698	0.496952	0.144148	0.211216	1.23602e-05	0.0823898	0.675798	0.997856	0	0	0	0	1.08989	0	0	0.716767	0	1.06516	1.19978	0	0
xtr-mir-375-3p	0.251843	0.461406	1.83211	0	0.54566	0	0.22396	0.000864807	0.0824012	0.507305	0.997856	0	0	0	0	0	0	0	0	0	1.06516	1.19978	1.00902	0
mze-mir-27d-3p_pny-mir-27d_stem-loop	0.437682	0.725469	1.65753	0.516033	0.346272	0.253616	0.316102	-0.000723527	0.0823832	0.977881	0.998109	0.548223	0	0	1.42918	1.63483	0	0	0	0	0	0	0	2.07763
let-7a-2-5p;let-7a-3-5p;let-7a-1-5p	1130.51	517.785	0.458008	1087.5	1180.7	168.407	239.65	0.000547298	0.0813458	0.981616	0.998234	1087.67	1010.46	717.618	675.287	882.807	1134.84	2103.81	1517.4	503.368	1648.87	221.959	1520.09	1672.5
miR-296-5p	1034.04	325.549	0.314831	1039.89	1027.23	142.688	102.689	0.000525632	0.0806809	0.986045	0.998234	825.075	1062.15	1050.47	1566.38	455.027	770.988	1549.11	1519.55	1065.27	713.659	1018.61	834.459	1011.81
miR-152-3p	217.129	95.4626	0.439658	229.221	203.022	10.6761	55.4447	0.000329033	0.0815033	0.984326	0.998234	200.101	279.7	229.027	259.396	215.252	224.404	196.665	53.7575	234.124	195.457	52.7903	456.581	225.423
miR-31-5p	105.138	111.437	1.05992	99.3137	111.932	52.1252	27.783	6.57879e-05	0.0821553	0.98546	0.998234	55.9187	0.708102	42.7517	47.8775	91.5504	431.176	25.2134	194.961	0	145.927	43.592	127.136	159.978
miR-143-3p	35.2187	31.0802	0.882491	33.2707	37.4914	6.10092	17.2211	5.82192e-05	0.0822289	0.987397	0.998234	30.7005	0.708102	24.4295	48.5921	38.146	36.8664	53.4525	53.7575	117.062	50.0627	0	3.02706	1.03882
miR-212	27.0163	21.2393	0.786166	26.7993	27.2694	8.08645	8.59509	3.66948e-05	0.0822311	0.98677	0.998234	32.3452	0	54.9665	13.5772	59.9437	9.61731	17.1451	25.0869	0	51.6604	0	48.4329	38.4362
miR-487b	12.6686	17.1913	1.357	12.9752	12.3108	7.24645	5.93377	-7.65082e-05	0.0822849	0.983455	0.998234	6.03045	0	0	3.57295	14.7135	8.01442	58.4952	0	0	11.7168	0	23.7119	38.4362
miR-3613-3p	10.0076	8.90627	0.889955	10.6472	9.2613	3.12135	3.90006	-6.00083e-05	0.0822407	0.985601	0.998234	17.5431	0	24.4295	15.721	8.17414	1.60288	7.05976	11.4683	0	1.06516	0	20.1804	22.854
miR-29d-3p	9.31236	14.1616	1.52074	8.02407	10.8154	2.4027	7.99155	9.93551e-05	0.0823283	0.980333	0.998234	0.548223	17.7026	3.05369	7.86049	9.26402	1.60288	16.1366	2.86707	0	4.26065	1.19978	54.487	2.07763
miR-2285al-5p	5.68078	12.4394	2.18974	3.59218	8.11748	1.50846	7.13745	0.000145782	0.0823821	0.984205	0.998234	3.28934	0	12.2148	4.28754	0.544943	4.80865	0	0	0	0	47.1913	1.51353	0
cfa-mir-8868-3p	4.91711	8.16445	1.66042	5.93237	3.73265	2.97247	3.40743	-1.85869e-05	0.0823834	0.987771	0.998234	4.38578	14.162	21.3758	0	0	1.60288	0	0	0	0	22.3959	0	0
miR-2285bw-5p;miR-2285k-3-5p	2.35308	5.70636	2.42506	1.4871	3.3634	1.21694	3.07035	-0.000230359	0.0823799	0.985947	0.998234	9.31979	0	0	0	1.08989	0	0	0	0	0	0	20.1804	0
hco-mir-5928b-5p	1.88835	4.24832	2.24975	1.02599	2.89444	0.676186	2.36258	-8.72071e-05	0.0823933	0.981055	0.998234	0	0	0	5.00213	2.17977	0	0	15.7689	0	1.59774	0	0	0
abu-mir-27e-2-3p_mze-mir-27e-2_stem-loop_nbr-mir-27e-2_stem-loop_pny-mir-27e-2_stem-loop;ipu-mir-27e-3p;ssa-mir-27c-2-3p	1.21495	0.925467	0.761731	1.68242	0.669573	0.345394	0.234192	-0.00074966	0.0823282	0.985515	0.998234	0.548223	2.12431	3.05369	0.71459	2.72471	1.60288	1.00854	0	0	1.06516	0.399927	1.51353	1.03882
miR-194-5p	202.453	119.046	0.588014	188.172	219.115	42.7567	50.432	5.14016e-05	0.0819311	0.988709	0.998285	225.868	24.0755	149.631	107.903	414.701	227.61	167.417	422.893	175.593	215.696	4.39919	261.336	234.773
miR-3432a-2-5p;miR-3432a-1-5p;miR-3432b-5p	56.9677	33.4433	0.587057	57.5137	56.3307	11.552	14.9037	5.30565e-05	0.0818263	0.991002	0.998285	51.533	17.7026	94.6644	79.3195	32.6966	28.8519	97.8282	87.4456	11.7062	35.1504	100.782	15.6398	87.2606
miR-128-1-5p	3.0876	6.94745	2.25011	1.48794	4.95388	0.971605	3.8816	3.2502e-05	0.0823929	0.990601	0.998285	0	0	0	7.1459	3.26966	0	0	0	0	3.72807	25.9952	0	0
gga-mir-12256-5p	2.28031	3.77639	1.65609	3.6262	0.710109	1.70709	0.648238	-0.000331725	0.0823921	0.991017	0.998285	0	0	9.16108	5.00213	0	11.2202	0	0	0	4.26065	0	0	0
miR-2332-3p	1.61746	3.06041	1.89211	2.24303	0.887636	1.37163	0.810297	-0.000286573	0.0823926	0.991308	0.998285	0	0	0	9.28967	0	6.41154	0	0	0	5.32582	0	0	0
ame-mir-3776-5p	3.75362	6.64794	1.77107	3.34845	4.22631	1.47811	3.59394	-0.000172111	0.0823251	0.99266	0.998631	0	0	6.10738	1.42918	0	4.80865	11.0939	0	0	1.06516	0.399927	0	23.8928
mmu-mir-6244-5p	1.84907	3.62798	1.96206	2.90516	0.616954	1.73973	0.404366	-0.000427218	0.08239	0.993048	0.998631	0	0	0	10.7188	0	9.61731	0	0	0	2.66291	0	0	1.03882
pte-mir-100a-5p	367.868	124.848	0.339382	344.2	395.481	25.1364	67.3247	0.000351127	0.0805259	0.994307	0.999195	439.675	382.375	329.799	380.162	364.022	296.534	216.836	344.765	327.774	390.382	753.462	291.606	264.898
miR-101-2-3p;miR-101-1-3p	1660.4	886.482	0.533897	1669.98	1649.22	317.086	383.262	0.000208587	0.0812948	0.999414	0.99957	1731.84	893.625	1032.15	1054.73	3536.68	1870.57	1570.29	708.883	889.673	1694.14	809.052	2952.39	2841.16
miR-9-2-5p;miR-9-1-5p	482.459	207.008	0.42907	486.816	477.375	58.082	104.282	0.000222243	0.081308	0.996421	0.99957	385.401	497.088	574.094	337.286	815.779	373.472	424.594	260.186	140.475	535.777	417.124	941.415	569.272
let-7c	307.232	176.515	0.574534	289.203	328.266	66.0904	71.8967	0.000339136	0.0816037	0.999133	0.99957	257.117	177.734	213.758	160.068	129.696	652.374	433.671	323.979	608.724	324.342	91.1833	469.698	151.667
pal-mir-9993b-3p	102.142	92.2651	0.903305	120.221	81.0487	42.4046	22.1109	0.000135579	0.0820957	0.996939	0.99957	4.93401	106.215	88.5571	97.1842	51.2246	381.487	111.948	9.31797	35.1187	51.1278	93.5828	139.245	157.9
hsa-mir-5193-5p	8.16637	9.31566	1.14073	8.45437	7.83038	3.53157	3.78511	-6.22246e-05	0.0822814	0.997912	0.99957	0	0.708102	12.2148	10.0043	0	8.01442	28.2391	0.716767	23.4124	4.79323	0.399927	0	17.6599
miR-126-5p	5.83241	6.19129	1.06153	5.96963	5.67232	1.69084	3.15323	1.47344e-05	0.0822696	0.99957	0.99957	12.0609	0	9.16108	3.57295	1.08989	4.80865	11.0939	0	0	2.66291	0	10.5947	20.7763
mmu-mir-466d-3p	1.05601	1.95943	1.85551	1.20409	0.883245	0.845488	0.635775	-0.000262031	0.0823791	0.997244	0.99957	0	0	0	0	0	6.41154	2.01708	0	0	4.26065	0	0	1.03882

## Sheet: S3 CH
Target	hsa-miR-151a-3p & hsa-miR-128-3p	hsa-let-7c-5p & hsa-miR-3960	hsa-miR-664b-3p & hsa-miR-6529-5p	hsa-miR-192-5p & hsa-miR-16-5p	hsa-miR-1306-5p & hsa-miR-664b-3p	hsa-miR-320a-3p & hsa-miR-1260b	hsa-miR-101-3p & hsa-miR-16-5p	hsa-let-7a-5p & hsa-miR-3960	Sum
TNPO1	1	0	0	1	0	0	1	0	3
MED13	1	0	0	1	0	0	1	0	3
SLC7A2	1	0	0	1	0	0	1	0	3
TM9SF3	1	0	0	1	0	0	1	0	3
PLAGL2	1	0	0	1	0	0	1	0	3
IL6ST	1	0	0	1	0	0	1	0	3
BMP2K	1	0	0	1	0	0	1	0	3
MSN	1	0	0	1	0	0	1	0	3
PURA	1	0	0	1	0	0	1	0	3
DYNLL2	1	0	0	1	0	0	1	0	3
PEG10	0	1	0	0	0	0	1	1	3
CCNE1	1	0	0	1	0	0	0	0	2
MEGF9	1	0	0	0	0	0	1	0	2
IREB2	1	0	0	0	0	0	1	0	2
MAP1B	1	0	0	0	0	0	1	0	2
MCL1	1	0	0	0	0	0	1	0	2
UHMK1	1	0	0	0	0	0	1	0	2
ANKRD52	1	0	0	0	0	0	1	0	2
SFT2D2	1	0	0	0	0	0	1	0	2
KIAA0100	1	0	0	1	0	0	0	0	2
REV3L	1	0	0	0	0	0	1	0	2
ZNF207	1	0	0	0	0	0	1	0	2
MATR3	1	0	0	0	0	0	1	0	2
NCKAP1	1	0	0	0	0	0	1	0	2
RHOA	1	0	0	0	0	0	1	0	2
ATP2B1	1	0	0	0	0	0	1	0	2
XPO1	1	0	0	1	0	0	0	0	2
CBX5	1	0	0	0	0	0	1	0	2
HSP90AB1	1	0	0	0	0	0	1	0	2
CDK6	1	0	0	0	0	0	1	0	2
MTPN	1	0	0	0	0	0	1	0	2
YKT6	1	0	0	0	0	0	1	0	2
CPEB3	1	0	0	0	0	0	1	0	2
CCND1	1	0	0	0	0	0	1	0	2
EIF4G2	1	0	0	0	0	0	1	0	2
PDE4D	1	0	0	0	0	0	1	0	2
SLC35F5	1	0	0	0	0	0	1	0	2
IGFBP5	1	0	0	0	0	0	1	0	2
BIRC6	1	0	0	0	0	0	1	0	2
ARID1A	1	0	0	0	0	0	1	0	2
HNRNPA2B1	1	0	0	0	0	0	1	0	2
AGO2	1	0	0	1	0	0	0	0	2
DIAPH1	1	0	0	0	0	0	1	0	2
PPIG	1	0	0	0	0	0	1	0	2
ITPRID2	1	0	0	0	0	0	1	0	2
SDE2	1	0	0	0	0	0	1	0	2
ABT1	1	0	0	0	0	0	1	0	2
MTDH	1	0	0	1	0	0	0	0	2
NTRK2	1	0	0	0	0	0	1	0	2
UGCG	1	0	0	0	0	0	1	0	2
BACH1	1	0	0	0	0	0	1	0	2
EFCAB14	1	0	0	0	0	0	1	0	2
LARP4	1	0	0	0	0	0	1	0	2
CREBRF	1	0	0	1	0	0	0	0	2
ARL5B	1	0	0	1	0	0	0	0	2
NETO2	1	0	0	0	0	0	1	0	2
TRIB1	1	0	0	0	0	0	1	0	2
KLHL15	1	0	0	1	0	0	0	0	2
RGMB	1	0	0	0	0	0	1	0	2
RBM12B	1	0	0	0	1	0	0	0	2
BRWD1	1	0	0	1	0	0	0	0	2
ZNF267	1	0	0	1	0	0	0	0	2
ARID2	1	0	0	0	0	0	1	0	2
LCOR	1	0	0	0	0	0	1	0	2
DCP1A	1	0	0	1	0	0	0	0	2
GPAT4	0	1	0	0	0	0	0	1	2
CEP170B	0	1	0	0	0	0	0	1	2
VAV3	0	1	0	0	0	0	0	1	2
TFAP2A	0	1	0	0	0	0	0	1	2
ZBTB7B	0	1	0	0	0	0	0	1	2
MELTF	0	1	0	0	0	0	0	1	2
HIC2	0	1	0	0	0	0	0	1	2
ACVR2B	0	0	0	1	0	0	1	0	2
XIAP	0	0	0	1	0	0	1	0	2
TRIM23	0	0	0	1	0	0	1	0	2
ATP1B1	0	0	0	1	0	0	1	0	2
DST	0	0	0	1	0	0	1	0	2
CFL2	0	0	0	1	0	0	1	0	2
CHML	0	0	0	1	0	0	1	0	2
CREBL2	0	0	0	1	0	0	1	0	2
CRK	0	0	0	1	0	0	1	0	2
DDX3X	0	0	0	1	0	0	1	0	2
DDX6	0	0	0	1	0	0	1	0	2
EGR1	0	0	0	1	0	0	1	0	2
FBN1	0	0	0	1	0	0	1	0	2
FGF2	0	0	0	1	0	0	1	0	2
FOS	0	0	0	1	0	0	1	0	2
HOXA10	0	0	0	1	0	0	1	0	2
ID1	0	0	0	1	0	0	1	0	2
IGF1R	0	0	0	1	0	0	1	0	2
IMPA1	0	0	0	1	0	0	1	0	2
ITGA3	0	0	0	1	0	0	1	0	2
KIF5B	0	0	0	1	0	0	1	0	2
LMNB1	0	0	0	1	0	0	1	0	2
MAD2L1	0	0	0	1	0	0	1	0	2
MKI67	0	0	0	1	0	0	1	0	2
PPP1R12A	0	0	0	1	0	0	1	0	2
NFIB	0	0	0	1	0	0	1	0	2
PAFAH1B1	0	0	0	1	0	0	1	0	2
SERPINE1	0	0	0	1	0	0	1	0	2
PCDH7	0	0	0	1	0	0	1	0	2
PDE2A	0	0	0	1	0	0	1	0	2
PIM1	0	0	0	1	0	0	1	0	2
POU2F1	0	0	0	1	0	0	1	0	2
PPM1A	0	0	0	1	0	0	1	0	2
PRIM1	0	0	0	1	0	0	1	0	2
RAB1A	0	0	0	1	0	0	1	0	2
RBL2	0	0	0	1	0	0	1	0	2
RRM1	0	0	0	1	0	0	1	0	2
SLC1A4	0	0	0	1	0	0	1	0	2
SMARCA2	0	0	0	1	0	0	1	0	2
SPARC	0	0	0	1	0	0	1	0	2
TBL1X	0	0	0	1	0	0	1	0	2
TOP1	0	0	0	1	0	0	1	0	2
HSP90B1	0	0	0	1	0	0	1	0	2
UBE2D1	0	0	0	1	0	0	1	0	2
UNG	0	0	0	1	0	0	1	0	2
CDC7	0	0	0	1	0	0	1	0	2
EEA1	0	0	0	1	0	0	1	0	2
AP1S2	0	0	0	1	0	0	1	0	2
SPAG9	0	0	0	1	0	0	1	0	2
USP14	0	0	0	1	0	0	1	0	2
NMI	0	0	0	1	0	0	1	0	2
USP34	0	0	0	1	0	0	1	0	2
BCL2L11	0	0	0	1	0	0	1	0	2
SH2B3	0	0	0	1	0	0	1	0	2
SMC4	0	0	0	1	0	0	1	0	2
ACTR2	0	0	0	1	0	0	1	0	2
ARL4C	0	0	0	1	0	0	1	0	2
MFSD10	0	0	0	1	0	0	1	0	2
SYNCRIP	0	0	0	1	0	0	1	0	2
SLC19A2	0	0	0	1	0	0	1	0	2
CPSF6	0	0	0	1	0	0	1	0	2
HIBADH	0	0	0	1	0	0	1	0	2
FGFR1OP	0	0	0	1	0	0	1	0	2
ERLIN2	0	0	0	1	0	0	1	0	2
NUDT3	0	0	0	1	0	0	1	0	2
AKAP11	0	0	0	1	0	0	1	0	2
CLSTN1	0	0	0	1	0	0	1	0	2
OTUD3	0	0	0	1	0	0	1	0	2
DICER1	0	0	0	1	0	0	1	0	2
ARL2BP	0	0	0	1	0	0	1	0	2
SH3BP4	0	0	0	1	0	0	1	0	2
CADM1	0	0	0	1	0	0	1	0	2
TOR1AIP1	0	0	0	1	0	0	1	0	2
DIMT1	0	0	0	1	0	0	1	0	2
GULP1	0	0	0	1	0	0	1	0	2
ANLN	0	0	0	1	0	0	1	0	2
MRPL50	0	0	0	1	0	0	1	0	2
UHRF1BP1	0	0	0	1	0	0	1	0	2
CHD7	0	0	0	1	0	0	1	0	2
TMEM30A	0	0	0	1	0	0	1	0	2
ARNTL2	0	0	0	1	0	0	1	0	2
MRTFB	0	0	0	1	0	0	1	0	2
KIDINS220	0	0	0	1	0	0	1	0	2
STAMBPL1	0	0	0	1	0	0	1	0	2
FANCM	0	0	0	1	0	0	1	0	2
CREBZF	0	0	0	1	0	0	1	0	2
AASDHPPT	0	0	0	1	0	0	1	0	2
CLSPN	0	0	0	1	0	0	1	0	2
ZMAT3	0	0	0	1	0	0	1	0	2
MPP5	0	0	0	1	0	0	1	0	2
NUCKS1	0	0	0	1	0	0	1	0	2
ZBTB10	0	0	0	1	0	0	1	0	2
OGFRL1	0	0	0	1	0	0	1	0	2
L2HGDH	0	0	0	1	0	0	1	0	2
RMI1	0	0	0	1	0	0	1	0	2
REXO5	0	0	0	1	0	0	1	0	2
MEX3B	0	0	0	1	0	0	1	0	2
PCGF5	0	0	0	1	0	0	1	0	2
MFSD14B	0	0	0	1	0	0	1	0	2
ZIC5	0	0	0	1	0	0	1	0	2
GLCCI1	0	0	0	1	0	0	1	0	2
KCTD12	0	0	0	1	0	0	1	0	2
LRRC58	0	0	0	1	0	0	1	0	2
LYSMD3	0	0	0	1	0	0	1	0	2
DCBLD2	0	0	0	1	0	0	1	0	2
PRRC1	0	0	0	1	0	0	1	0	2
FAM199X	0	0	0	1	0	0	1	0	2
SGO2	0	0	0	1	0	0	1	0	2
TMTC3	0	0	0	1	0	0	1	0	2
FAM171B	0	0	0	1	0	0	1	0	2
FAM126B	0	0	0	1	0	0	1	0	2
NHLRC3	0	0	0	1	0	0	1	0	2
ZBTB34	0	0	0	1	0	0	1	0	2
FAM110C	0	0	0	1	0	0	1	0	2
ZFX	0	0	0	1	0	0	1	0	2
PUM2	0	0	0	1	0	0	1	0	2
HIPK2	0	0	0	1	0	0	1	0	2
CBFB	0	0	0	1	0	0	1	0	2
RORA	0	0	0	1	0	0	1	0	2
RAB21	0	0	0	1	0	0	1	0	2
HUWE1	0	0	0	1	0	0	1	0	2
SRRT	0	0	0	1	0	0	1	0	2
RBM27	0	0	0	1	0	0	1	0	2
TIMP3	0	0	0	1	0	0	1	0	2
TNRC6B	0	0	0	1	0	0	1	0	2
EP300	0	0	0	1	0	0	1	0	2
SLC1A5	0	0	0	1	0	0	1	0	2
RAB3D	0	0	0	1	0	0	1	0	2
DHX15	0	0	0	1	0	0	1	0	2
TRIM2	0	0	0	1	0	0	1	0	2
KLF3	0	0	0	1	0	0	1	0	2
ASH1L	0	0	0	1	0	0	1	0	2
SFPQ	0	0	0	1	0	0	1	0	2
PRRC2C	0	0	0	1	0	0	1	0	2
RAB14	0	0	0	1	0	0	1	0	2
SOX4	0	0	0	1	0	0	1	0	2
RLIM	0	0	0	1	0	0	1	0	2
SPART	0	0	0	1	0	0	1	0	2
NOTCH2	0	0	0	1	0	0	1	0	2
TMED7	0	0	0	1	0	0	1	0	2
LRRC1	0	0	0	1	0	0	1	0	2
BNIP2	0	0	0	1	0	0	1	0	2
CLTC	0	0	0	1	0	0	1	0	2
MAP3K21	0	0	0	1	0	0	1	0	2
RAB5A	0	0	0	1	0	0	1	0	2
FEM1C	0	0	0	1	0	0	1	0	2
G3BP1	0	0	0	1	0	0	1	0	2
PHIP	0	0	0	1	0	0	1	0	2
LIN7C	0	0	0	1	0	0	1	0	2
ELK4	0	0	0	1	0	0	1	0	2
NSD1	0	0	0	1	0	0	1	0	2
B2M	0	0	0	1	0	0	1	0	2
SEPTIN2	0	0	0	1	0	0	1	0	2
ZEB2	0	0	0	1	0	0	1	0	2
HNRNPF	0	0	0	1	0	0	1	0	2
CDK1	0	0	0	1	0	0	1	0	2
SP3	0	0	0	1	0	0	1	0	2
AGFG1	0	0	0	1	0	0	1	0	2
ZBTB41	0	0	0	1	0	0	1	0	2
NRIP1	0	0	0	1	0	0	1	0	2
SF3B3	0	0	0	1	0	0	1	0	2
CD55	0	0	0	1	0	0	1	0	2
NHLRC2	0	0	0	1	0	0	1	0	2
ARHGEF12	0	0	0	1	0	0	1	0	2
HELZ	0	0	0	1	0	0	1	0	2
MT-CO2	0	0	0	1	0	0	1	0	2
DMD	0	0	0	1	0	0	1	0	2
HSPA1A	0	0	0	1	0	0	1	0	2
TOMM6	0	0	0	1	0	0	1	0	2
ATXN1L	0	0	0	1	0	0	1	0	2
PISD	0	0	0	1	0	0	1	0	2
TXNIP	0	0	0	1	0	0	1	0	2
CHD4	0	0	0	0	1	0	1	0	2
RAD23B	0	0	0	0	1	0	1	0	2
PRKAA1	0	0	0	0	1	0	1	0	2
APP	0	0	0	0	1	0	1	0	2
EN2	0	0	0	0	1	0	1	0	2
SETD5	0	0	0	0	1	0	1	0	2
HIF1A	1	0	0	0	0	0	0	0	1
KCNJ6	1	0	0	0	0	0	0	0	1
NTRK3	1	0	0	0	0	0	0	0	1
ZNF711	1	0	0	0	0	0	0	0	1
EIF3B	1	0	0	0	0	0	0	0	1
YWHAQ	1	0	0	0	0	0	0	0	1
SEPTIN8	1	0	0	0	0	0	0	0	1
RYBP	1	0	0	0	0	0	0	0	1
MBTD1	1	0	0	0	0	0	0	0	1
SETD7	1	0	0	0	0	0	0	0	1
STXBP4	1	0	0	0	0	0	0	0	1
PIM3	1	0	0	0	0	0	0	0	1
FBXL3	1	0	0	0	0	0	0	0	1
AC005747.1	1	0	0	0	0	0	0	0	1
IDS	1	0	0	0	0	0	0	0	1
PTBP1	1	0	0	0	0	0	0	0	1
UFL1	1	0	0	0	0	0	0	0	1
SNAI2	1	0	0	0	0	0	0	0	1
BIRC3	1	0	0	0	0	0	0	0	1
SIKE1	1	0	0	0	0	0	0	0	1
SERTAD4	1	0	0	0	0	0	0	0	1
SUCO	1	0	0	0	0	0	0	0	1
RANGAP1	1	0	0	0	0	0	0	0	1
ADNP	1	0	0	0	0	0	0	0	1
RNMT	1	0	0	0	0	0	0	0	1
ELOB	1	0	0	0	0	0	0	0	1
EIF3J	1	0	0	0	0	0	0	0	1
GRB10	1	0	0	0	0	0	0	0	1
SRSF4	1	0	0	0	0	0	0	0	1
ERI3	1	0	0	0	0	0	0	0	1
STAG1	1	0	0	0	0	0	0	0	1
YLPM1	1	0	0	0	0	0	0	0	1
ETF1	1	0	0	0	0	0	0	0	1
KCNJ2	1	0	0	0	0	0	0	0	1
CNOT1	1	0	0	0	0	0	0	0	1
PRR12	1	0	0	0	0	0	0	0	1
KLHDC10	1	0	0	0	0	0	0	0	1
CCNT1	1	0	0	0	0	0	0	0	1
ATXN10	1	0	0	0	0	0	0	0	1
LATS1	1	0	0	0	0	0	0	0	1
XPO4	1	0	0	0	0	0	0	0	1
ATP13A3	1	0	0	0	0	0	0	0	1
NAV1	1	0	0	0	0	0	0	0	1
ETS1	1	0	0	0	0	0	0	0	1
GCC2	1	0	0	0	0	0	0	0	1
CKAP2	1	0	0	0	0	0	0	0	1
RNF144B	1	0	0	0	0	0	0	0	1
KIAA1109	1	0	0	0	0	0	0	0	1
KIF21A	1	0	0	0	0	0	0	0	1
FBLN5	1	0	0	0	0	0	0	0	1
NIPA2	1	0	0	0	0	0	0	0	1
ABL2	1	0	0	0	0	0	0	0	1
ARF1	1	0	0	0	0	0	0	0	1
DYNLT1	1	0	0	0	0	0	0	0	1
HMGA2	1	0	0	0	0	0	0	0	1
HSPB8	1	0	0	0	0	0	0	0	1
SLC26A2	1	0	0	0	0	0	0	0	1
EIF5B	1	0	0	0	0	0	0	0	1
SON	1	0	0	0	0	0	0	0	1
TSC1	1	0	0	0	0	0	0	0	1
COPS2	1	0	0	0	0	0	0	0	1
YWHAB	1	0	0	0	0	0	0	0	1
GREM1	1	0	0	0	0	0	0	0	1
FAM102A	1	0	0	0	0	0	0	0	1
GATAD2A	1	0	0	0	0	0	0	0	1
LRATD2	1	0	0	0	0	0	0	0	1
PDCD6IP	1	0	0	0	0	0	0	0	1
SLC30A1	1	0	0	0	0	0	0	0	1
SLFN11	1	0	0	0	0	0	0	0	1
PHC3	1	0	0	0	0	0	0	0	1
CDK5R1	1	0	0	0	0	0	0	0	1
CHD9	1	0	0	0	0	0	0	0	1
MAGEF1	1	0	0	0	0	0	0	0	1
MRFAP1L1	1	0	0	0	0	0	0	0	1
KLHL28	1	0	0	0	0	0	0	0	1
AEN	1	0	0	0	0	0	0	0	1
COPB2	1	0	0	0	0	0	0	0	1
PPP1CC	1	0	0	0	0	0	0	0	1
BLOC1S2	1	0	0	0	0	0	0	0	1
ZNF766	1	0	0	0	0	0	0	0	1
DDI2	1	0	0	0	0	0	0	0	1
ERO1A	1	0	0	0	0	0	0	0	1
BAZ1A	1	0	0	0	0	0	0	0	1
ZNF652	1	0	0	0	0	0	0	0	1
PRKDC	1	0	0	0	0	0	0	0	1
AL035425.3	1	0	0	0	0	0	0	0	1
No_Shared_Targets	0	0	1	0	0	0	0	0	1
DHFR	0	0	0	1	0	0	0	0	1
ACADSB	0	0	0	1	0	0	0	0	1
ACVR2A	0	0	0	1	0	0	0	0	1
ALCAM	0	0	0	1	0	0	0	0	1
APC	0	0	0	1	0	0	0	0	1
ASPH	0	0	0	1	0	0	0	0	1
BARD1	0	0	0	1	0	0	0	0	1
BCL2	0	0	0	1	0	0	0	0	1
BLM	0	0	0	1	0	0	0	0	1
BMI1	0	0	0	1	0	0	0	0	1
BRCA1	0	0	0	1	0	0	0	0	1
BRCA2	0	0	0	1	0	0	0	0	1
BUB1B	0	0	0	1	0	0	0	0	1
BYSL	0	0	0	1	0	0	0	0	1
CA8	0	0	0	1	0	0	0	0	1
CAMK4	0	0	0	1	0	0	0	0	1
CAV1	0	0	0	1	0	0	0	0	1
CDC20	0	0	0	1	0	0	0	0	1
CDC25A	0	0	0	1	0	0	0	0	1
CDKN2A	0	0	0	1	0	0	0	0	1
CDKN3	0	0	0	1	0	0	0	0	1
CENPA	0	0	0	1	0	0	0	0	1
CENPE	0	0	0	1	0	0	0	0	1
CENPF	0	0	0	1	0	0	0	0	1
CLK1	0	0	0	1	0	0	0	0	1
CYP24A1	0	0	0	1	0	0	0	0	1
DDOST	0	0	0	1	0	0	0	0	1
COCH	0	0	0	1	0	0	0	0	1
DHCR24	0	0	0	1	0	0	0	0	1
DYRK1A	0	0	0	1	0	0	0	0	1
E2F5	0	0	0	1	0	0	0	0	1
ECT2	0	0	0	1	0	0	0	0	1
EFNB2	0	0	0	1	0	0	0	0	1
ACSL1	0	0	0	1	0	0	0	0	1
FEN1	0	0	0	1	0	0	0	0	1
GPC4	0	0	0	1	0	0	0	0	1
CENPI	0	0	0	1	0	0	0	0	1
HMGCS1	0	0	0	1	0	0	0	0	1
HMMR	0	0	0	1	0	0	0	0	1
ID2	0	0	0	1	0	0	0	0	1
IFRD1	0	0	0	1	0	0	0	0	1
IL7	0	0	0	1	0	0	0	0	1
IL15	0	0	0	1	0	0	0	0	1
ITGB1	0	0	0	1	0	0	0	0	1
KIF5C	0	0	0	1	0	0	0	0	1
KPNA5	0	0	0	1	0	0	0	0	1
LMAN1	0	0	0	1	0	0	0	0	1
MCM3	0	0	0	1	0	0	0	0	1
DNAJB9	0	0	0	1	0	0	0	0	1
KMT2A	0	0	0	1	0	0	0	0	1
MT1X	0	0	0	1	0	0	0	0	1
MYB	0	0	0	1	0	0	0	0	1
NAB1	0	0	0	1	0	0	0	0	1
NBN	0	0	0	1	0	0	0	0	1
NCBP1	0	0	0	1	0	0	0	0	1
NEK1	0	0	0	1	0	0	0	0	1
NFYA	0	0	0	1	0	0	0	0	1
NID1	0	0	0	1	0	0	0	0	1
NSF	0	0	0	1	0	0	0	0	1
ODC1	0	0	0	1	0	0	0	0	1
OPA1	0	0	0	1	0	0	0	0	1
ORC1	0	0	0	1	0	0	0	0	1
ORC4	0	0	0	1	0	0	0	0	1
PLOD1	0	0	0	1	0	0	0	0	1
UBL3	0	0	0	1	0	0	0	0	1
PODXL	0	0	0	1	0	0	0	0	1
PPARG	0	0	0	1	0	0	0	0	1
PRKAR1A	0	0	0	1	0	0	0	0	1
MAPK9	0	0	0	1	0	0	0	0	1
PRNP	0	0	0	1	0	0	0	0	1
PSMB5	0	0	0	1	0	0	0	0	1
PTPRE	0	0	0	1	0	0	0	0	1
PTS	0	0	0	1	0	0	0	0	1
RAB3B	0	0	0	1	0	0	0	0	1
RAD51	0	0	0	1	0	0	0	0	1
RNASEL	0	0	0	1	0	0	0	0	1
RPS6KB1	0	0	0	1	0	0	0	0	1
STIL	0	0	0	1	0	0	0	0	1
SPTBN1	0	0	0	1	0	0	0	0	1
SRD5A1	0	0	0	1	0	0	0	0	1
SS18	0	0	0	1	0	0	0	0	1
TPM4	0	0	0	1	0	0	0	0	1
TTK	0	0	0	1	0	0	0	0	1
UGT8	0	0	0	1	0	0	0	0	1
USP1	0	0	0	1	0	0	0	0	1
NSD2	0	0	0	1	0	0	0	0	1
WT1	0	0	0	1	0	0	0	0	1
XK	0	0	0	1	0	0	0	0	1
ZBTB14	0	0	0	1	0	0	0	0	1
ZNF85	0	0	0	1	0	0	0	0	1
PXDN	0	0	0	1	0	0	0	0	1
BRD3	0	0	0	1	0	0	0	0	1
CUL5	0	0	0	1	0	0	0	0	1
NCOA3	0	0	0	1	0	0	0	0	1
FZD1	0	0	0	1	0	0	0	0	1
FZD4	0	0	0	1	0	0	0	0	1
PIP4K2B	0	0	0	1	0	0	0	0	1
CUL3	0	0	0	1	0	0	0	0	1
TTF2	0	0	0	1	0	0	0	0	1
RANBP3	0	0	0	1	0	0	0	0	1
ENC1	0	0	0	1	0	0	0	0	1
CDC14A	0	0	0	1	0	0	0	0	1
ABCC3	0	0	0	1	0	0	0	0	1
PABPC4	0	0	0	1	0	0	0	0	1
CD164	0	0	0	1	0	0	0	0	1
SAP30	0	0	0	1	0	0	0	0	1
IQGAP1	0	0	0	1	0	0	0	0	1
FUBP1	0	0	0	1	0	0	0	0	1
LRRFIP2	0	0	0	1	0	0	0	0	1
TRIP13	0	0	0	1	0	0	0	0	1
ZNHIT3	0	0	0	1	0	0	0	0	1
TJP2	0	0	0	1	0	0	0	0	1
KIF23	0	0	0	1	0	0	0	0	1
ATP6V1G1	0	0	0	1	0	0	0	0	1
KIF20B	0	0	0	1	0	0	0	0	1
DLGAP5	0	0	0	1	0	0	0	0	1
MTSS1	0	0	0	1	0	0	0	0	1
ARHGAP11A	0	0	0	1	0	0	0	0	1
EPM2AIP1	0	0	0	1	0	0	0	0	1
SEC24D	0	0	0	1	0	0	0	0	1
KIF14	0	0	0	1	0	0	0	0	1
AMMECR1	0	0	0	1	0	0	0	0	1
ZBTB33	0	0	0	1	0	0	0	0	1
TROAP	0	0	0	1	0	0	0	0	1
KIF20A	0	0	0	1	0	0	0	0	1
AKAP9	0	0	0	1	0	0	0	0	1
TFG	0	0	0	1	0	0	0	0	1
LAMTOR5	0	0	0	1	0	0	0	0	1
ARFGEF1	0	0	0	1	0	0	0	0	1
SMC2	0	0	0	1	0	0	0	0	1
POLQ	0	0	0	1	0	0	0	0	1
TCFL5	0	0	0	1	0	0	0	0	1
PLK4	0	0	0	1	0	0	0	0	1
ZMYND11	0	0	0	1	0	0	0	0	1
ZBTB6	0	0	0	1	0	0	0	0	1
RAB40B	0	0	0	1	0	0	0	0	1
TMED10	0	0	0	1	0	0	0	0	1
DNAJB4	0	0	0	1	0	0	0	0	1
PRSS23	0	0	0	1	0	0	0	0	1
PRDM4	0	0	0	1	0	0	0	0	1
RASSF8	0	0	0	1	0	0	0	0	1
RHOBTB3	0	0	0	1	0	0	0	0	1
COBLL1	0	0	0	1	0	0	0	0	1
RAB11FIP2	0	0	0	1	0	0	0	0	1
ENPP4	0	0	0	1	0	0	0	0	1
ELL2	0	0	0	1	0	0	0	0	1
FNBP1	0	0	0	1	0	0	0	0	1
SNX13	0	0	0	1	0	0	0	0	1
NEMP1	0	0	0	1	0	0	0	0	1
NCAPH	0	0	0	1	0	0	0	0	1
MACF1	0	0	0	1	0	0	0	0	1
ZNF346	0	0	0	1	0	0	0	0	1
POLA2	0	0	0	1	0	0	0	0	1
CEMIP2	0	0	0	1	0	0	0	0	1
BCL2L13	0	0	0	1	0	0	0	0	1
PANX1	0	0	0	1	0	0	0	0	1
RAD54B	0	0	0	1	0	0	0	0	1
LRIG1	0	0	0	1	0	0	0	0	1
APPL1	0	0	0	1	0	0	0	0	1
EDRF1	0	0	0	1	0	0	0	0	1
PHF19	0	0	0	1	0	0	0	0	1
FBXW2	0	0	0	1	0	0	0	0	1
FBXO3	0	0	0	1	0	0	0	0	1
SLC39A1	0	0	0	1	0	0	0	0	1
TOR1B	0	0	0	1	0	0	0	0	1
SLCO3A1	0	0	0	1	0	0	0	0	1
NOB1	0	0	0	1	0	0	0	0	1
RACGAP1	0	0	0	1	0	0	0	0	1
CUZD1	0	0	0	1	0	0	0	0	1
COPS7A	0	0	0	1	0	0	0	0	1
METTL9	0	0	0	1	0	0	0	0	1
NAA20	0	0	0	1	0	0	0	0	1
PLCE1	0	0	0	1	0	0	0	0	1
NIN	0	0	0	1	0	0	0	0	1
ZDHHC2	0	0	0	1	0	0	0	0	1
DTL	0	0	0	1	0	0	0	0	1
RAB23	0	0	0	1	0	0	0	0	1
CMPK1	0	0	0	1	0	0	0	0	1
COQ3	0	0	0	1	0	0	0	0	1
CYCS	0	0	0	1	0	0	0	0	1
RSBN1	0	0	0	1	0	0	0	0	1
ERCC6L	0	0	0	1	0	0	0	0	1
VPS13C	0	0	0	1	0	0	0	0	1
NSD3	0	0	0	1	0	0	0	0	1
PARP16	0	0	0	1	0	0	0	0	1
CLN6	0	0	0	1	0	0	0	0	1
CDCA4	0	0	0	1	0	0	0	0	1
RFWD3	0	0	0	1	0	0	0	0	1
CEP55	0	0	0	1	0	0	0	0	1
RIC8B	0	0	0	1	0	0	0	0	1
BBS7	0	0	0	1	0	0	0	0	1
FANCI	0	0	0	1	0	0	0	0	1
NEIL3	0	0	0	1	0	0	0	0	1
MIS18BP1	0	0	0	1	0	0	0	0	1
AGPAT5	0	0	0	1	0	0	0	0	1
SLC39A9	0	0	0	1	0	0	0	0	1
HJURP	0	0	0	1	0	0	0	0	1
CHST12	0	0	0	1	0	0	0	0	1
G2E3	0	0	0	1	0	0	0	0	1
DEPDC1	0	0	0	1	0	0	0	0	1
C1orf112	0	0	0	1	0	0	0	0	1
CAND1	0	0	0	1	0	0	0	0	1
CTPS2	0	0	0	1	0	0	0	0	1
EMC7	0	0	0	1	0	0	0	0	1
KIF15	0	0	0	1	0	0	0	0	1
CHPT1	0	0	0	1	0	0	0	0	1
CTNNBIP1	0	0	0	1	0	0	0	0	1
CCDC47	0	0	0	1	0	0	0	0	1
KNL1	0	0	0	1	0	0	0	0	1
ENTPD7	0	0	0	1	0	0	0	0	1
ATP10D	0	0	0	1	0	0	0	0	1
ADGRG6	0	0	0	1	0	0	0	0	1
NHSL1	0	0	0	1	0	0	0	0	1
CLK4	0	0	0	1	0	0	0	0	1
KIAA1143	0	0	0	1	0	0	0	0	1
MIB1	0	0	0	1	0	0	0	0	1
PHF12	0	0	0	1	0	0	0	0	1
ZFYVE28	0	0	0	1	0	0	0	0	1
PTBP2	0	0	0	1	0	0	0	0	1
INIP	0	0	0	1	0	0	0	0	1
ELOVL5	0	0	0	1	0	0	0	0	1
SPCS3	0	0	0	1	0	0	0	0	1
PERP	0	0	0	1	0	0	0	0	1
CENPK	0	0	0	1	0	0	0	0	1
SLC39A8	0	0	0	1	0	0	0	0	1
TENT4B	0	0	0	1	0	0	0	0	1
FNDC3B	0	0	0	1	0	0	0	0	1
ELOVL1	0	0	0	1	0	0	0	0	1
REEP1	0	0	0	1	0	0	0	0	1
SOWAHC	0	0	0	1	0	0	0	0	1
MIS12	0	0	0	1	0	0	0	0	1
DDX54	0	0	0	1	0	0	0	0	1
RNF26	0	0	0	1	0	0	0	0	1
HAUS3	0	0	0	1	0	0	0	0	1
RPAP3	0	0	0	1	0	0	0	0	1
HSPBAP1	0	0	0	1	0	0	0	0	1
PLEKHF2	0	0	0	1	0	0	0	0	1
NOL9	0	0	0	1	0	0	0	0	1
CLIP4	0	0	0	1	0	0	0	0	1
ZMYM1	0	0	0	1	0	0	0	0	1
ATAD5	0	0	0	1	0	0	0	0	1
CNTNAP3	0	0	0	1	0	0	0	0	1
ERMP1	0	0	0	1	0	0	0	0	1
JADE1	0	0	0	1	0	0	0	0	1
WDR76	0	0	0	1	0	0	0	0	1
DSN1	0	0	0	1	0	0	0	0	1
CCDC15	0	0	0	1	0	0	0	0	1
PIF1	0	0	0	1	0	0	0	0	1
BBOF1	0	0	0	1	0	0	0	0	1
DBF4B	0	0	0	1	0	0	0	0	1
NAA50	0	0	0	1	0	0	0	0	1
FAM83D	0	0	0	1	0	0	0	0	1
MAP1LC3B	0	0	0	1	0	0	0	0	1
SPRY4	0	0	0	1	0	0	0	0	1
KIF18A	0	0	0	1	0	0	0	0	1
NUF2	0	0	0	1	0	0	0	0	1
HASPIN	0	0	0	1	0	0	0	0	1
KATNAL1	0	0	0	1	0	0	0	0	1
ZNRF3	0	0	0	1	0	0	0	0	1
DCUN1D5	0	0	0	1	0	0	0	0	1
FAM126A	0	0	0	1	0	0	0	0	1
PSRC1	0	0	0	1	0	0	0	0	1
TMTC4	0	0	0	1	0	0	0	0	1
UBASH3B	0	0	0	1	0	0	0	0	1
FHDC1	0	0	0	1	0	0	0	0	1
ZC3H12C	0	0	0	1	0	0	0	0	1
C5orf30	0	0	0	1	0	0	0	0	1
TICRR	0	0	0	1	0	0	0	0	1
SLC25A51	0	0	0	1	0	0	0	0	1
TMEM200A	0	0	0	1	0	0	0	0	1
OSBPL8	0	0	0	1	0	0	0	0	1
SFR1	0	0	0	1	0	0	0	0	1
NIPA1	0	0	0	1	0	0	0	0	1
CRYBG3	0	0	0	1	0	0	0	0	1
EMB	0	0	0	1	0	0	0	0	1
AFAP1L1	0	0	0	1	0	0	0	0	1
HINT3	0	0	0	1	0	0	0	0	1
POGLUT3	0	0	0	1	0	0	0	0	1
MIPOL1	0	0	0	1	0	0	0	0	1
CEP128	0	0	0	1	0	0	0	0	1
NRG4	0	0	0	1	0	0	0	0	1
EME1	0	0	0	1	0	0	0	0	1
LSM14B	0	0	0	1	0	0	0	0	1
CKAP2L	0	0	0	1	0	0	0	0	1
SEPTIN10	0	0	0	1	0	0	0	0	1
SLC16A14	0	0	0	1	0	0	0	0	1
FAM120AOS	0	0	0	1	0	0	0	0	1
SLC35G1	0	0	0	1	0	0	0	0	1
GPR180	0	0	0	1	0	0	0	0	1
ZFP1	0	0	0	1	0	0	0	0	1
C18orf54	0	0	0	1	0	0	0	0	1
SGMS2	0	0	0	1	0	0	0	0	1
PRIMPOL	0	0	0	1	0	0	0	0	1
ZNF449	0	0	0	1	0	0	0	0	1
HYLS1	0	0	0	1	0	0	0	0	1
SKA1	0	0	0	1	0	0	0	0	1
KDM1B	0	0	0	1	0	0	0	0	1
MSRB3	0	0	0	1	0	0	0	0	1
ZDHHC23	0	0	0	1	0	0	0	0	1
PCSK9	0	0	0	1	0	0	0	0	1
ASPM	0	0	0	1	0	0	0	0	1
GAS2L3	0	0	0	1	0	0	0	0	1
GPR137C	0	0	0	1	0	0	0	0	1
ZNF780A	0	0	0	1	0	0	0	0	1
RIMKLA	0	0	0	1	0	0	0	0	1
CCDC18	0	0	0	1	0	0	0	0	1
KIF24	0	0	0	1	0	0	0	0	1
GEN1	0	0	0	1	0	0	0	0	1
ZNF704	0	0	0	1	0	0	0	0	1
KRIT1	0	0	0	1	0	0	0	0	1
MYLIP	0	0	0	1	0	0	0	0	1
RAB27B	0	0	0	1	0	0	0	0	1
KIFC1	0	0	0	1	0	0	0	0	1
RDH11	0	0	0	1	0	0	0	0	1
NFATC3	0	0	0	1	0	0	0	0	1
FSCN1	0	0	0	1	0	0	0	0	1
ACTB	0	0	0	1	0	0	0	0	1
KIFAP3	0	0	0	1	0	0	0	0	1
GPR137B	0	0	0	1	0	0	0	0	1
CXCL2	0	0	0	1	0	0	0	0	1
B4GALT1	0	0	0	1	0	0	0	0	1
DDX24	0	0	0	1	0	0	0	0	1
HIVEP1	0	0	0	1	0	0	0	0	1
DSP	0	0	0	1	0	0	0	0	1
MTAP	0	0	0	1	0	0	0	0	1
TOMM22	0	0	0	1	0	0	0	0	1
GTPBP1	0	0	0	1	0	0	0	0	1
TXN2	0	0	0	1	0	0	0	0	1
DAAM1	0	0	0	1	0	0	0	0	1
APEX1	0	0	0	1	0	0	0	0	1
KPNA3	0	0	0	1	0	0	0	0	1
GSK3A	0	0	0	1	0	0	0	0	1
CLIP2	0	0	0	1	0	0	0	0	1
MPP2	0	0	0	1	0	0	0	0	1
CCDC86	0	0	0	1	0	0	0	0	1
ATN1	0	0	0	1	0	0	0	0	1
FRK	0	0	0	1	0	0	0	0	1
GPR63	0	0	0	1	0	0	0	0	1
PTP4A1	0	0	0	1	0	0	0	0	1
ATP6V0E1	0	0	0	1	0	0	0	0	1
MRPL3	0	0	0	1	0	0	0	0	1
AUP1	0	0	0	1	0	0	0	0	1
CCT4	0	0	0	1	0	0	0	0	1
EHBP1	0	0	0	1	0	0	0	0	1
ICMT	0	0	0	1	0	0	0	0	1
KCNC4	0	0	0	1	0	0	0	0	1
UTP25	0	0	0	1	0	0	0	0	1
UCHL3	0	0	0	1	0	0	0	0	1
SENP5	0	0	0	1	0	0	0	0	1
PTPA	0	0	0	1	0	0	0	0	1
CBX3	0	0	0	1	0	0	0	0	1
GTF3C4	0	0	0	1	0	0	0	0	1
CAPNS1	0	0	0	1	0	0	0	0	1
ZNF384	0	0	0	1	0	0	0	0	1
CANX	0	0	0	1	0	0	0	0	1
HEATR5A	0	0	0	1	0	0	0	0	1
RPA1	0	0	0	1	0	0	0	0	1
KHDC4	0	0	0	1	0	0	0	0	1
DCAF8	0	0	0	1	0	0	0	0	1
IRS4	0	0	0	1	0	0	0	0	1
ARF3	0	0	0	1	0	0	0	0	1
MDM2	0	0	0	1	0	0	0	0	1
IL6	0	0	0	1	0	0	0	0	1
MYC	0	0	0	1	0	0	0	0	1
ANXA7	0	0	0	1	0	0	0	0	1
TARBP2	0	0	0	1	0	0	0	0	1
DPP9	0	0	0	1	0	0	0	0	1
GFOD1	0	0	0	1	0	0	0	0	1
GIGYF1	0	0	0	1	0	0	0	0	1
NONO	0	0	0	1	0	0	0	0	1
VLDLR	0	0	0	1	0	0	0	0	1
CELF1	0	0	0	1	0	0	0	0	1
DLAT	0	0	0	1	0	0	0	0	1
ANKRD40	0	0	0	1	0	0	0	0	1
PCDH1	0	0	0	1	0	0	0	0	1
SLC37A3	0	0	0	1	0	0	0	0	1
TYW3	0	0	0	1	0	0	0	0	1
WDR82	0	0	0	1	0	0	0	0	1
NIPBL	0	0	0	1	0	0	0	0	1
RICTOR	0	0	0	1	0	0	0	0	1
DLC1	0	0	0	1	0	0	0	0	1
TP53INP1	0	0	0	1	0	0	0	0	1
UBAP1	0	0	0	1	0	0	0	0	1
PIP4P1	0	0	0	1	0	0	0	0	1
NOLC1	0	0	0	1	0	0	0	0	1
CDK12	0	0	0	1	0	0	0	0	1
IRGQ	0	0	0	1	0	0	0	0	1
RAB8A	0	0	0	1	0	0	0	0	1
PROSER3	0	0	0	1	0	0	0	0	1
AXL	0	0	0	1	0	0	0	0	1
SRRM2	0	0	0	1	0	0	0	0	1
LTBP3	0	0	0	1	0	0	0	0	1
REEP4	0	0	0	1	0	0	0	0	1
PWWP2A	0	0	0	1	0	0	0	0	1
SOCS6	0	0	0	1	0	0	0	0	1
POLR1C	0	0	0	1	0	0	0	0	1
EXO1	0	0	0	1	0	0	0	0	1
CTDSP2	0	0	0	1	0	0	0	0	1
MCFD2	0	0	0	1	0	0	0	0	1
POLR2A	0	0	0	1	0	0	0	0	1
SETD2	0	0	0	1	0	0	0	0	1
CREB3L2	0	0	0	1	0	0	0	0	1
CBX6	0	0	0	1	0	0	0	0	1
XPOT	0	0	0	1	0	0	0	0	1
SEPTIN9	0	0	0	1	0	0	0	0	1
TNFAIP2	0	0	0	1	0	0	0	0	1
GPATCH8	0	0	0	1	0	0	0	0	1
ENTPD5	0	0	0	1	0	0	0	0	1
CHP1	0	0	0	1	0	0	0	0	1
S100A16	0	0	0	1	0	0	0	0	1
TUBB	0	0	0	1	0	0	0	0	1
TBC1D9B	0	0	0	1	0	0	0	0	1
HTT	0	0	0	1	0	0	0	0	1
ZNF460	0	0	0	1	0	0	0	0	1
SLC5A3	0	0	0	1	0	0	0	0	1
PNP	0	0	0	1	0	0	0	0	1
NFKBIL1	0	0	0	1	0	0	0	0	1
HMGN1	0	0	0	1	0	0	0	0	1
C5orf51	0	0	0	1	0	0	0	0	1
RBM12	0	0	0	1	0	0	0	0	1
ANKHD1-EIF4EBP3	0	0	0	1	0	0	0	0	1
AL121758.1	0	0	0	1	0	0	0	0	1
MLLT6	0	0	0	1	0	0	0	0	1
DUSP14	0	0	0	1	0	0	0	0	1
H4C2	0	0	0	1	0	0	0	0	1
CXorf56	0	0	0	0	1	0	0	0	1
TPR	0	0	0	0	1	0	0	0	1
CYLD	0	0	0	0	1	0	0	0	1
EIF4A1	0	0	0	0	1	0	0	0	1
ZBTB7A	0	0	0	0	1	0	0	0	1
HLA-DRB1	0	0	0	0	1	0	0	0	1
DDX39B	0	0	0	0	1	0	0	0	1
HSPA1B	0	0	0	0	1	0	0	0	1
POLR3D	0	0	0	0	0	1	0	0	1
PTGS2	0	0	0	0	0	0	1	0	1
AMD1	0	0	0	0	0	0	1	0	1
BIRC5	0	0	0	0	0	0	1	0	1
ATP5F1B	0	0	0	0	0	0	1	0	1
BCL9	0	0	0	0	0	0	1	0	1
PRDM1	0	0	0	0	0	0	1	0	1
ZFP36L2	0	0	0	0	0	0	1	0	1
CCNF	0	0	0	0	0	0	1	0	1
CD81	0	0	0	0	0	0	1	0	1
CDK8	0	0	0	0	0	0	1	0	1
CDKN1A	0	0	0	0	0	0	1	0	1
KLF6	0	0	0	0	0	0	1	0	1
CTNNB1	0	0	0	0	0	0	1	0	1
DCTD	0	0	0	0	0	0	1	0	1
DYNC1LI2	0	0	0	0	0	0	1	0	1
DUSP1	0	0	0	0	0	0	1	0	1
E2F3	0	0	0	0	0	0	1	0	1
ELAVL2	0	0	0	0	0	0	1	0	1
NR2F6	0	0	0	0	0	0	1	0	1
EYA1	0	0	0	0	0	0	1	0	1
FBN2	0	0	0	0	0	0	1	0	1
MTOR	0	0	0	0	0	0	1	0	1
GNB1	0	0	0	0	0	0	1	0	1
GRSF1	0	0	0	0	0	0	1	0	1
HNRNPU	0	0	0	0	0	0	1	0	1
DNAJA1	0	0	0	0	0	0	1	0	1
HSP90AA1	0	0	0	0	0	0	1	0	1
JAK2	0	0	0	0	0	0	1	0	1
JUN	0	0	0	0	0	0	1	0	1
KPNA2	0	0	0	0	0	0	1	0	1
LBR	0	0	0	0	0	0	1	0	1
LIFR	0	0	0	0	0	0	1	0	1
CD180	0	0	0	0	0	0	1	0	1
MBNL1	0	0	0	0	0	0	1	0	1
CD46	0	0	0	0	0	0	1	0	1
MEIS1	0	0	0	0	0	0	1	0	1
MET	0	0	0	0	0	0	1	0	1
MKLN1	0	0	0	0	0	0	1	0	1
MSH2	0	0	0	0	0	0	1	0	1
NACA	0	0	0	0	0	0	1	0	1
SLC11A2	0	0	0	0	0	0	1	0	1
PIK3C2B	0	0	0	0	0	0	1	0	1
PIP4K2A	0	0	0	0	0	0	1	0	1
PLAG1	0	0	0	0	0	0	1	0	1
PRKAB1	0	0	0	0	0	0	1	0	1
MAP2K1	0	0	0	0	0	0	1	0	1
RAC1	0	0	0	0	0	0	1	0	1
REL	0	0	0	0	0	0	1	0	1
RREB1	0	0	0	0	0	0	1	0	1
RRM2	0	0	0	0	0	0	1	0	1
SMARCD1	0	0	0	0	0	0	1	0	1
SOX9	0	0	0	0	0	0	1	0	1
SREBF2	0	0	0	0	0	0	1	0	1
STYX	0	0	0	0	0	0	1	0	1
TAF13	0	0	0	0	0	0	1	0	1
ZEB1	0	0	0	0	0	0	1	0	1
TFAP4	0	0	0	0	0	0	1	0	1
TGFBR2	0	0	0	0	0	0	1	0	1
TGFBR3	0	0	0	0	0	0	1	0	1
TNFAIP1	0	0	0	0	0	0	1	0	1
TSN	0	0	0	0	0	0	1	0	1
UBE2A	0	0	0	0	0	0	1	0	1
UBE2D3	0	0	0	0	0	0	1	0	1
VEGFA	0	0	0	0	0	0	1	0	1
VEGFC	0	0	0	0	0	0	1	0	1
VHL	0	0	0	0	0	0	1	0	1
WNT7A	0	0	0	0	0	0	1	0	1
BTG2	0	0	0	0	0	0	1	0	1
REEP5	0	0	0	0	0	0	1	0	1
GAN	0	0	0	0	0	0	1	0	1
FZD6	0	0	0	0	0	0	1	0	1
DYRK2	0	0	0	0	0	0	1	0	1
SMARCA5	0	0	0	0	0	0	1	0	1
CBX4	0	0	0	0	0	0	1	0	1
PIAS1	0	0	0	0	0	0	1	0	1
STX16	0	0	0	0	0	0	1	0	1
CDC123	0	0	0	0	0	0	1	0	1
BTRC	0	0	0	0	0	0	1	0	1
INA	0	0	0	0	0	0	1	0	1
VAPA	0	0	0	0	0	0	1	0	1
RPS6KA5	0	0	0	0	0	0	1	0	1
CTR9	0	0	0	0	0	0	1	0	1
N4BP1	0	0	0	0	0	0	1	0	1
BZW1	0	0	0	0	0	0	1	0	1
MLEC	0	0	0	0	0	0	1	0	1
TSC22D2	0	0	0	0	0	0	1	0	1
SPATA2	0	0	0	0	0	0	1	0	1
ZC3H11A	0	0	0	0	0	0	1	0	1
PPP4R1	0	0	0	0	0	0	1	0	1
RANBP9	0	0	0	0	0	0	1	0	1
MBNL2	0	0	0	0	0	0	1	0	1
IPO7	0	0	0	0	0	0	1	0	1
TGOLN2	0	0	0	0	0	0	1	0	1
FRS2	0	0	0	0	0	0	1	0	1
KIF2C	0	0	0	0	0	0	1	0	1
FNDC3A	0	0	0	0	0	0	1	0	1
SACM1L	0	0	0	0	0	0	1	0	1
XPO7	0	0	0	0	0	0	1	0	1
TBC1D12	0	0	0	0	0	0	1	0	1
PHF3	0	0	0	0	0	0	1	0	1
SLC39A6	0	0	0	0	0	0	1	0	1
MOB4	0	0	0	0	0	0	1	0	1
ANKRD17	0	0	0	0	0	0	1	0	1
SZRD1	0	0	0	0	0	0	1	0	1
AP3M1	0	0	0	0	0	0	1	0	1
AFF4	0	0	0	0	0	0	1	0	1
ANKRD11	0	0	0	0	0	0	1	0	1
USP25	0	0	0	0	0	0	1	0	1
ZBTB21	0	0	0	0	0	0	1	0	1
TMED5	0	0	0	0	0	0	1	0	1
GOLGA7	0	0	0	0	0	0	1	0	1
NT5C3A	0	0	0	0	0	0	1	0	1
PANK1	0	0	0	0	0	0	1	0	1
IL20RB	0	0	0	0	0	0	1	0	1
SLC38A2	0	0	0	0	0	0	1	0	1
OTUD4	0	0	0	0	0	0	1	0	1
RNF111	0	0	0	0	0	0	1	0	1
ZCCHC2	0	0	0	0	0	0	1	0	1
INO80D	0	0	0	0	0	0	1	0	1
FBXW7	0	0	0	0	0	0	1	0	1
VEZT	0	0	0	0	0	0	1	0	1
SEPTIN11	0	0	0	0	0	0	1	0	1
NXT2	0	0	0	0	0	0	1	0	1
SPIRE1	0	0	0	0	0	0	1	0	1
RTN4	0	0	0	0	0	0	1	0	1
NUFIP2	0	0	0	0	0	0	1	0	1
TRMT9B	0	0	0	0	0	0	1	0	1
KIAA1456	0	0	0	0	0	0	1	0	1
RNF213	0	0	0	0	0	0	1	0	1
GPAM	0	0	0	0	0	0	1	0	1
KIAA1586	0	0	0	0	0	0	1	0	1
RAP2C	0	0	0	0	0	0	1	0	1
ABHD17C	0	0	0	0	0	0	1	0	1
PLEKHA1	0	0	0	0	0	0	1	0	1
TGIF2	0	0	0	0	0	0	1	0	1
FAM217B	0	0	0	0	0	0	1	0	1
TMEM168	0	0	0	0	0	0	1	0	1
SLC30A5	0	0	0	0	0	0	1	0	1
MRPL44	0	0	0	0	0	0	1	0	1
PLEKHA3	0	0	0	0	0	0	1	0	1
NKAP	0	0	0	0	0	0	1	0	1
QSER1	0	0	0	0	0	0	1	0	1
RAB11FIP1	0	0	0	0	0	0	1	0	1
ORAI2	0	0	0	0	0	0	1	0	1
AMMECR1L	0	0	0	0	0	0	1	0	1
RAMAC	0	0	0	0	0	0	1	0	1
ARID5B	0	0	0	0	0	0	1	0	1
FAR1	0	0	0	0	0	0	1	0	1
MTSS2	0	0	0	0	0	0	1	0	1
NACC1	0	0	0	0	0	0	1	0	1
ARAP2	0	0	0	0	0	0	1	0	1
AEBP2	0	0	0	0	0	0	1	0	1
FRMD6	0	0	0	0	0	0	1	0	1
NAA30	0	0	0	0	0	0	1	0	1
AP1S3	0	0	0	0	0	0	1	0	1
NEK7	0	0	0	0	0	0	1	0	1
ZNF827	0	0	0	0	0	0	1	0	1
DENND5B	0	0	0	0	0	0	1	0	1
KCNG3	0	0	0	0	0	0	1	0	1
AGO4	0	0	0	0	0	0	1	0	1
UBN2	0	0	0	0	0	0	1	0	1
ZDHHC24	0	0	0	0	0	0	1	0	1
CHAMP1	0	0	0	0	0	0	1	0	1
SREK1IP1	0	0	0	0	0	0	1	0	1
ZNF284	0	0	0	0	0	0	1	0	1
DIPK1A	0	0	0	0	0	0	1	0	1
HSPE1-MOB4	0	0	0	0	0	0	1	0	1
CYP51A1	0	0	0	0	0	0	1	0	1
VPS50	0	0	0	0	0	0	1	0	1
CDC27	0	0	0	0	0	0	1	0	1
DHX33	0	0	0	0	0	0	1	0	1
KMT2E	0	0	0	0	0	0	1	0	1
GDE1	0	0	0	0	0	0	1	0	1
MAP3K9	0	0	0	0	0	0	1	0	1
SYPL1	0	0	0	0	0	0	1	0	1
ST3GAL1	0	0	0	0	0	0	1	0	1
SEC62	0	0	0	0	0	0	1	0	1
CSDE1	0	0	0	0	0	0	1	0	1
UBE3C	0	0	0	0	0	0	1	0	1
SPRTN	0	0	0	0	0	0	1	0	1
NISCH	0	0	0	0	0	0	1	0	1
RNF216	0	0	0	0	0	0	1	0	1
TMEM159	0	0	0	0	0	0	1	0	1
MBTPS2	0	0	0	0	0	0	1	0	1
GPRC5A	0	0	0	0	0	0	1	0	1
ATP2C1	0	0	0	0	0	0	1	0	1
FHL1	0	0	0	0	0	0	1	0	1
GABRA1	0	0	0	0	0	0	1	0	1
FAS	0	0	0	0	0	0	1	0	1
CD44	0	0	0	0	0	0	1	0	1
TBPL1	0	0	0	0	0	0	1	0	1
VCL	0	0	0	0	0	0	1	0	1
ADSS2	0	0	0	0	0	0	1	0	1
MAT2B	0	0	0	0	0	0	1	0	1
TRIO	0	0	0	0	0	0	1	0	1
MED17	0	0	0	0	0	0	1	0	1
DCUN1D1	0	0	0	0	0	0	1	0	1
ADRB1	0	0	0	0	0	0	1	0	1
DSG2	0	0	0	0	0	0	1	0	1
FAM214A	0	0	0	0	0	0	1	0	1
MAP4	0	0	0	0	0	0	1	0	1
CELF2	0	0	0	0	0	0	1	0	1
VAMP3	0	0	0	0	0	0	1	0	1
KIF1B	0	0	0	0	0	0	1	0	1
KMT2C	0	0	0	0	0	0	1	0	1
RC3H2	0	0	0	0	0	0	1	0	1
NDC1	0	0	0	0	0	0	1	0	1
CDK17	0	0	0	0	0	0	1	0	1
MON2	0	0	0	0	0	0	1	0	1
WAPL	0	0	0	0	0	0	1	0	1
SLC12A2	0	0	0	0	0	0	1	0	1
WDR3	0	0	0	0	0	0	1	0	1
ZC3H15	0	0	0	0	0	0	1	0	1
MTHFD2	0	0	0	0	0	0	1	0	1
ISOC1	0	0	0	0	0	0	1	0	1
ACSL4	0	0	0	0	0	0	1	0	1
PRR11	0	0	0	0	0	0	1	0	1
PSME4	0	0	0	0	0	0	1	0	1
MAST4	0	0	0	0	0	0	1	0	1
MAPK6	0	0	0	0	0	0	1	0	1
HDHD5	0	0	0	0	0	0	1	0	1
PFN2	0	0	0	0	0	0	1	0	1
SLC44A1	0	0	0	0	0	0	1	0	1
EXOC5	0	0	0	0	0	0	1	0	1
DGCR2	0	0	0	0	0	0	1	0	1
NDST1	0	0	0	0	0	0	1	0	1
MGAT4A	0	0	0	0	0	0	1	0	1
SEL1L	0	0	0	0	0	0	1	0	1
TRHDE	0	0	0	0	0	0	1	0	1
FBXW11	0	0	0	0	0	0	1	0	1
PICALM	0	0	0	0	0	0	1	0	1
CLASP1	0	0	0	0	0	0	1	0	1
CA12	0	0	0	0	0	0	1	0	1
NTN4	0	0	0	0	0	0	1	0	1
NUAK1	0	0	0	0	0	0	1	0	1
DPP8	0	0	0	0	0	0	1	0	1
SEMA3C	0	0	0	0	0	0	1	0	1
ADD2	0	0	0	0	0	0	1	0	1
SLC25A3	0	0	0	0	0	0	1	0	1
FOSL2	0	0	0	0	0	0	1	0	1
BAZ2A	0	0	0	0	0	0	1	0	1
TPD52	0	0	0	0	0	0	1	0	1
CTTNBP2	0	0	0	0	0	0	1	0	1
PIAS2	0	0	0	0	0	0	1	0	1
EDN1	0	0	0	0	0	0	1	0	1
MLLT10	0	0	0	0	0	0	1	0	1
TNRC6C	0	0	0	0	0	0	1	0	1
XRCC5	0	0	0	0	0	0	1	0	1
DDX1	0	0	0	0	0	0	1	0	1
RFX3	0	0	0	0	0	0	1	0	1
PSEN1	0	0	0	0	0	0	1	0	1
CLDND1	0	0	0	0	0	0	1	0	1
RBL1	0	0	0	0	0	0	1	0	1
DLGAP4	0	0	0	0	0	0	1	0	1
CDC14B	0	0	0	0	0	0	1	0	1
CCNT2	0	0	0	0	0	0	1	0	1
GSK3B	0	0	0	0	0	0	1	0	1
PDS5B	0	0	0	0	0	0	1	0	1
OXCT1	0	0	0	0	0	0	1	0	1
ZNF264	0	0	0	0	0	0	1	0	1
YTHDC1	0	0	0	0	0	0	1	0	1
APLP2	0	0	0	0	0	0	1	0	1
ATRX	0	0	0	0	0	0	1	0	1
RRN3	0	0	0	0	0	0	1	0	1
DDHD2	0	0	0	0	0	0	1	0	1
RBM22	0	0	0	0	0	0	1	0	1
ZFAND6	0	0	0	0	0	0	1	0	1
MTMR2	0	0	0	0	0	0	1	0	1
ATXN7L3	0	0	0	0	0	0	1	0	1
TXNDC16	0	0	0	0	0	0	1	0	1
RFX2	0	0	0	0	0	0	1	0	1
PTPN4	0	0	0	0	0	0	1	0	1
MAVS	0	0	0	0	0	0	1	0	1
SLC23A2	0	0	0	0	0	0	1	0	1
SLC9A1	0	0	0	0	0	0	1	0	1
TNRC6A	0	0	0	0	0	0	1	0	1
ZFHX4	0	0	0	0	0	0	1	0	1
HECTD1	0	0	0	0	0	0	1	0	1
AGO1	0	0	0	0	0	0	1	0	1
COMT	0	0	0	0	0	0	1	0	1
ARCN1	0	0	0	0	0	0	1	0	1
EPB41L4B	0	0	0	0	0	0	1	0	1
BTAF1	0	0	0	0	0	0	1	0	1
IL11	0	0	0	0	0	0	1	0	1
NRP1	0	0	0	0	0	0	1	0	1
FBXL19	0	0	0	0	0	0	1	0	1
CIRBP	0	0	0	0	0	0	1	0	1
MAPK1	0	0	0	0	0	0	1	0	1
MFNG	0	0	0	0	0	0	1	0	1
CARD10	0	0	0	0	0	0	1	0	1
DDX17	0	0	0	0	0	0	1	0	1
RPL3	0	0	0	0	0	0	1	0	1
RBX1	0	0	0	0	0	0	1	0	1
ZC3H7B	0	0	0	0	0	0	1	0	1
KHNYN	0	0	0	0	0	0	1	0	1
PSMC6	0	0	0	0	0	0	1	0	1
VTI1B	0	0	0	0	0	0	1	0	1
SPTLC2	0	0	0	0	0	0	1	0	1
EIF5	0	0	0	0	0	0	1	0	1
ZFYVE21	0	0	0	0	0	0	1	0	1
GSKIP	0	0	0	0	0	0	1	0	1
PABPN1	0	0	0	0	0	0	1	0	1
ARHGAP5	0	0	0	0	0	0	1	0	1
SEC23A	0	0	0	0	0	0	1	0	1
PRELID3B	0	0	0	0	0	0	1	0	1
CDS2	0	0	0	0	0	0	1	0	1
RPRD1B	0	0	0	0	0	0	1	0	1
ACOT8	0	0	0	0	0	0	1	0	1
ADNP2	0	0	0	0	0	0	1	0	1
SMAD7	0	0	0	0	0	0	1	0	1
SMARCA1	0	0	0	0	0	0	1	0	1
FLT1	0	0	0	0	0	0	1	0	1
TSC22D1	0	0	0	0	0	0	1	0	1
SLC7A6	0	0	0	0	0	0	1	0	1
SLC7A5	0	0	0	0	0	0	1	0	1
PIEZO1	0	0	0	0	0	0	1	0	1
AAGAB	0	0	0	0	0	0	1	0	1
TMEM87A	0	0	0	0	0	0	1	0	1
TJP1	0	0	0	0	0	0	1	0	1
LAPTM4B	0	0	0	0	0	0	1	0	1
SQLE	0	0	0	0	0	0	1	0	1
SLC39A14	0	0	0	0	0	0	1	0	1
ASAH1	0	0	0	0	0	0	1	0	1
KCNN4	0	0	0	0	0	0	1	0	1
SYDE1	0	0	0	0	0	0	1	0	1
FKBP8	0	0	0	0	0	0	1	0	1
ITGB8	0	0	0	0	0	0	1	0	1
HBP1	0	0	0	0	0	0	1	0	1
H2AZ2	0	0	0	0	0	0	1	0	1
GARS1	0	0	0	0	0	0	1	0	1
TSPAN13	0	0	0	0	0	0	1	0	1
SLC1A1	0	0	0	0	0	0	1	0	1
RIC1	0	0	0	0	0	0	1	0	1
SETX	0	0	0	0	0	0	1	0	1
DVL1	0	0	0	0	0	0	1	0	1
CCNJ	0	0	0	0	0	0	1	0	1
GATA3	0	0	0	0	0	0	1	0	1
MAPK8	0	0	0	0	0	0	1	0	1
TNKS2	0	0	0	0	0	0	1	0	1
LARP4B	0	0	0	0	0	0	1	0	1
SMC3	0	0	0	0	0	0	1	0	1
SHOC2	0	0	0	0	0	0	1	0	1
UBTF	0	0	0	0	0	0	1	0	1
MTMR4	0	0	0	0	0	0	1	0	1
TRIM37	0	0	0	0	0	0	1	0	1
RAI1	0	0	0	0	0	0	1	0	1
VAT1	0	0	0	0	0	0	1	0	1
LUC7L3	0	0	0	0	0	0	1	0	1
MMD	0	0	0	0	0	0	1	0	1
WSB1	0	0	0	0	0	0	1	0	1
PMP22	0	0	0	0	0	0	1	0	1
DCUN1D4	0	0	0	0	0	0	1	0	1
USP46	0	0	0	0	0	0	1	0	1
TBC1D9	0	0	0	0	0	0	1	0	1
GAB1	0	0	0	0	0	0	1	0	1
CLCN3	0	0	0	0	0	0	1	0	1
NECTIN1	0	0	0	0	0	0	1	0	1
PDHX	0	0	0	0	0	0	1	0	1
SOX6	0	0	0	0	0	0	1	0	1
GLI1	0	0	0	0	0	0	1	0	1
METAP2	0	0	0	0	0	0	1	0	1
ELK3	0	0	0	0	0	0	1	0	1
CDK2AP1	0	0	0	0	0	0	1	0	1
SLC38A1	0	0	0	0	0	0	1	0	1
TPI1	0	0	0	0	0	0	1	0	1
COL12A1	0	0	0	0	0	0	1	0	1
SERINC1	0	0	0	0	0	0	1	0	1
MAPK14	0	0	0	0	0	0	1	0	1
SOD2	0	0	0	0	0	0	1	0	1
CCNC	0	0	0	0	0	0	1	0	1
ASCC3	0	0	0	0	0	0	1	0	1
PHACTR2	0	0	0	0	0	0	1	0	1
QKI	0	0	0	0	0	0	1	0	1
PPP2R5D	0	0	0	0	0	0	1	0	1
SENP6	0	0	0	0	0	0	1	0	1
TENT5A	0	0	0	0	0	0	1	0	1
HMGCR	0	0	0	0	0	0	1	0	1
CNOT6	0	0	0	0	0	0	1	0	1
CCNG1	0	0	0	0	0	0	1	0	1
NR3C1	0	0	0	0	0	0	1	0	1
SEC24A	0	0	0	0	0	0	1	0	1
RARS1	0	0	0	0	0	0	1	0	1
CSNK1A1	0	0	0	0	0	0	1	0	1
STC2	0	0	0	0	0	0	1	0	1
CPEB4	0	0	0	0	0	0	1	0	1
KPNA1	0	0	0	0	0	0	1	0	1
TUSC2	0	0	0	0	0	0	1	0	1
ATP6V1A	0	0	0	0	0	0	1	0	1
SCAP	0	0	0	0	0	0	1	0	1
ABCC5	0	0	0	0	0	0	1	0	1
STAM2	0	0	0	0	0	0	1	0	1
GPD2	0	0	0	0	0	0	1	0	1
GLS	0	0	0	0	0	0	1	0	1
PAPOLG	0	0	0	0	0	0	1	0	1
CHMP3	0	0	0	0	0	0	1	0	1
DCAF17	0	0	0	0	0	0	1	0	1
MARK1	0	0	0	0	0	0	1	0	1
QSOX1	0	0	0	0	0	0	1	0	1
EDEM3	0	0	0	0	0	0	1	0	1
NCF2	0	0	0	0	0	0	1	0	1
OSCP1	0	0	0	0	0	0	1	0	1
EXOC8	0	0	0	0	0	0	1	0	1
AKT3	0	0	0	0	0	0	1	0	1
ADGRL2	0	0	0	0	0	0	1	0	1
SSX2IP	0	0	0	0	0	0	1	0	1
APH1A	0	0	0	0	0	0	1	0	1
AKR1A1	0	0	0	0	0	0	1	0	1
DR1	0	0	0	0	0	0	1	0	1
CNN3	0	0	0	0	0	0	1	0	1
RPA2	0	0	0	0	0	0	1	0	1
MESD	0	0	0	0	0	0	1	0	1
CAMSAP2	0	0	0	0	0	0	1	0	1
KLF7	0	0	0	0	0	0	1	0	1
DCLRE1B	0	0	0	0	0	0	1	0	1
CCND2	0	0	0	0	0	0	1	0	1
PTBP3	0	0	0	0	0	0	1	0	1
PPP6C	0	0	0	0	0	0	1	0	1
AREL1	0	0	0	0	0	0	1	0	1
RBM25	0	0	0	0	0	0	1	0	1
ATL2	0	0	0	0	0	0	1	0	1
FAM98A	0	0	0	0	0	0	1	0	1
HELLS	0	0	0	0	0	0	1	0	1
AVPI1	0	0	0	0	0	0	1	0	1
GNA13	0	0	0	0	0	0	1	0	1
CAAP1	0	0	0	0	0	0	1	0	1
INSL4	0	0	0	0	0	0	1	0	1
EPC1	0	0	0	0	0	0	1	0	1
DNAJC15	0	0	0	0	0	0	1	0	1
TRIM6	0	0	0	0	0	0	1	0	1
TMEM39B	0	0	0	0	0	0	1	0	1
LRIF1	0	0	0	0	0	0	1	0	1
SEPTIN7	0	0	0	0	0	0	1	0	1
CYREN	0	0	0	0	0	0	1	0	1
EGR2	0	0	0	0	0	0	1	0	1
NECAB1	0	0	0	0	0	0	1	0	1
IKZF4	0	0	0	0	0	0	1	0	1
LPGAT1	0	0	0	0	0	0	1	0	1
CKS2	0	0	0	0	0	0	1	0	1
ACSL3	0	0	0	0	0	0	1	0	1
SDC4	0	0	0	0	0	0	1	0	1
VAPB	0	0	0	0	0	0	1	0	1
RAB22A	0	0	0	0	0	0	1	0	1
USP22	0	0	0	0	0	0	1	0	1
USP9X	0	0	0	0	0	0	1	0	1
SSR1	0	0	0	0	0	0	1	0	1
IRF1	0	0	0	0	0	0	1	0	1
MIF4GD	0	0	0	0	0	0	1	0	1
THOC2	0	0	0	0	0	0	1	0	1
FLRT3	0	0	0	0	0	0	1	0	1
AGO3	0	0	0	0	0	0	1	0	1
KLC1	0	0	0	0	0	0	1	0	1
ZBTB1	0	0	0	0	0	0	1	0	1
RHOT1	0	0	0	0	0	0	1	0	1
BCL11B	0	0	0	0	0	0	1	0	1
UBR4	0	0	0	0	0	0	1	0	1
GNAI1	0	0	0	0	0	0	1	0	1
CDC42EP1	0	0	0	0	0	0	1	0	1
CPA4	0	0	0	0	0	0	1	0	1
DUT	0	0	0	0	0	0	1	0	1
CHAC1	0	0	0	0	0	0	1	0	1
LOXL1	0	0	0	0	0	0	1	0	1
PUS7L	0	0	0	0	0	0	1	0	1
TEP1	0	0	0	0	0	0	1	0	1
SAT1	0	0	0	0	0	0	1	0	1
AFDN	0	0	0	0	0	0	1	0	1
ACTN4	0	0	0	0	0	0	1	0	1
ZSWIM6	0	0	0	0	0	0	1	0	1
CAMSAP1	0	0	0	0	0	0	1	0	1
EIF2S3	0	0	0	0	0	0	1	0	1
SESN2	0	0	0	0	0	0	1	0	1
CLIP1	0	0	0	0	0	0	1	0	1
ZNF341	0	0	0	0	0	0	1	0	1
KIF3A	0	0	0	0	0	0	1	0	1
ACLY	0	0	0	0	0	0	1	0	1
MCCC2	0	0	0	0	0	0	1	0	1
CHSY1	0	0	0	0	0	0	1	0	1
RAN	0	0	0	0	0	0	1	0	1
UBE2G1	0	0	0	0	0	0	1	0	1
PNISR	0	0	0	0	0	0	1	0	1
BTBD3	0	0	0	0	0	0	1	0	1
ARHGEF11	0	0	0	0	0	0	1	0	1
SYT11	0	0	0	0	0	0	1	0	1
SERINC3	0	0	0	0	0	0	1	0	1
POMP	0	0	0	0	0	0	1	0	1
MPRIP	0	0	0	0	0	0	1	0	1
STARD13	0	0	0	0	0	0	1	0	1
MED6	0	0	0	0	0	0	1	0	1
TIMM17A	0	0	0	0	0	0	1	0	1
NARS1	0	0	0	0	0	0	1	0	1
EMP1	0	0	0	0	0	0	1	0	1
ACP2	0	0	0	0	0	0	1	0	1
PUM1	0	0	0	0	0	0	1	0	1
DTNA	0	0	0	0	0	0	1	0	1
TMEM165	0	0	0	0	0	0	1	0	1
ARGLU1	0	0	0	0	0	0	1	0	1
ARHGAP32	0	0	0	0	0	0	1	0	1
WDR36	0	0	0	0	0	0	1	0	1
UBQLN1	0	0	0	0	0	0	1	0	1
MAP3K7	0	0	0	0	0	0	1	0	1
DYSF	0	0	0	0	0	0	1	0	1
USP15	0	0	0	0	0	0	1	0	1
CEP350	0	0	0	0	0	0	1	0	1
ITM2C	0	0	0	0	0	0	1	0	1
WNT10A	0	0	0	0	0	0	1	0	1
CAB39	0	0	0	0	0	0	1	0	1
SCYL2	0	0	0	0	0	0	1	0	1
FLNB	0	0	0	0	0	0	1	0	1
TNS3	0	0	0	0	0	0	1	0	1
ZDHHC4	0	0	0	0	0	0	1	0	1
BZW2	0	0	0	0	0	0	1	0	1
TTYH3	0	0	0	0	0	0	1	0	1
SRSF1	0	0	0	0	0	0	1	0	1
DCAF7	0	0	0	0	0	0	1	0	1
MARCHF7	0	0	0	0	0	0	1	0	1
TANK	0	0	0	0	0	0	1	0	1
SKIL	0	0	0	0	0	0	1	0	1
ENPP2	0	0	0	0	0	0	1	0	1
RANBP6	0	0	0	0	0	0	1	0	1
POLR1E	0	0	0	0	0	0	1	0	1
CNPY3	0	0	0	0	0	0	1	0	1
KIF13A	0	0	0	0	0	0	1	0	1
IRF4	0	0	0	0	0	0	1	0	1
TUBB2A	0	0	0	0	0	0	1	0	1
TCF19	0	0	0	0	0	0	1	0	1
IER3	0	0	0	0	0	0	1	0	1
CPEB2	0	0	0	0	0	0	1	0	1
RAB30	0	0	0	0	0	0	1	0	1
YAP1	0	0	0	0	0	0	1	0	1
SLTM	0	0	0	0	0	0	1	0	1
THBS1	0	0	0	0	0	0	1	0	1
ADAM10	0	0	0	0	0	0	1	0	1
SELENOI	0	0	0	0	0	0	1	0	1
CYP1B1	0	0	0	0	0	0	1	0	1
PREPL	0	0	0	0	0	0	1	0	1
AOX1	0	0	0	0	0	0	1	0	1
ABI2	0	0	0	0	0	0	1	0	1
SECISBP2L	0	0	0	0	0	0	1	0	1
PCDH10	0	0	0	0	0	0	1	0	1
G3BP2	0	0	0	0	0	0	1	0	1
SCARB2	0	0	0	0	0	0	1	0	1
CPNE8	0	0	0	0	0	0	1	0	1
SINHCAF	0	0	0	0	0	0	1	0	1
ETNK1	0	0	0	0	0	0	1	0	1
SLC7A1	0	0	0	0	0	0	1	0	1
TMBIM6	0	0	0	0	0	0	1	0	1
DENR	0	0	0	0	0	0	1	0	1
NOVA1	0	0	0	0	0	0	1	0	1
RAB15	0	0	0	0	0	0	1	0	1
WARS1	0	0	0	0	0	0	1	0	1
TSPAN3	0	0	0	0	0	0	1	0	1
DNAJA4	0	0	0	0	0	0	1	0	1
TPM1	0	0	0	0	0	0	1	0	1
ARRDC4	0	0	0	0	0	0	1	0	1
USP3	0	0	0	0	0	0	1	0	1
CHST4	0	0	0	0	0	0	1	0	1
ZFHX3	0	0	0	0	0	0	1	0	1
ZCCHC14	0	0	0	0	0	0	1	0	1
RPRD1A	0	0	0	0	0	0	1	0	1
IFITM3	0	0	0	0	0	0	1	0	1
SOD1	0	0	0	0	0	0	1	0	1
PRKACB	0	0	0	0	0	0	1	0	1
MOB3C	0	0	0	0	0	0	1	0	1
LMO4	0	0	0	0	0	0	1	0	1
HDGF	0	0	0	0	0	0	1	0	1
ANP32E	0	0	0	0	0	0	1	0	1
ATP8B2	0	0	0	0	0	0	1	0	1
GALNT2	0	0	0	0	0	0	1	0	1
PDIA6	0	0	0	0	0	0	1	0	1
RHOB	0	0	0	0	0	0	1	0	1
UBR3	0	0	0	0	0	0	1	0	1
HSPD1	0	0	0	0	0	0	1	0	1
COPS7B	0	0	0	0	0	0	1	0	1
SLC25A38	0	0	0	0	0	0	1	0	1
CTDSPL	0	0	0	0	0	0	1	0	1
TMF1	0	0	0	0	0	0	1	0	1
ABHD10	0	0	0	0	0	0	1	0	1
EPHA5	0	0	0	0	0	0	1	0	1
ANK2	0	0	0	0	0	0	1	0	1
SKP2	0	0	0	0	0	0	1	0	1
OSMR	0	0	0	0	0	0	1	0	1
RASA1	0	0	0	0	0	0	1	0	1
BDP1	0	0	0	0	0	0	1	0	1
YIPF5	0	0	0	0	0	0	1	0	1
LRRTM2	0	0	0	0	0	0	1	0	1
TNFRSF21	0	0	0	0	0	0	1	0	1
ARHGAP18	0	0	0	0	0	0	1	0	1
TMEM181	0	0	0	0	0	0	1	0	1
WTAP	0	0	0	0	0	0	1	0	1
PSPH	0	0	0	0	0	0	1	0	1
HAUS6	0	0	0	0	0	0	1	0	1
SURF4	0	0	0	0	0	0	1	0	1
LRRC4C	0	0	0	0	0	0	1	0	1
EIF3M	0	0	0	0	0	0	1	0	1
PTPRJ	0	0	0	0	0	0	1	0	1
SESN3	0	0	0	0	0	0	1	0	1
CHEK1	0	0	0	0	0	0	1	0	1
TAGLN	0	0	0	0	0	0	1	0	1
MMP3	0	0	0	0	0	0	1	0	1
LATS2	0	0	0	0	0	0	1	0	1
LYPD1	0	0	0	0	0	0	1	0	1
PDCD4	0	0	0	0	0	0	1	0	1
DIXDC1	0	0	0	0	0	0	1	0	1
ITPR1	0	0	0	0	0	0	1	0	1
ANK3	0	0	0	0	0	0	1	0	1
EIF4E	0	0	0	0	0	0	1	0	1
CSNK1G3	0	0	0	0	0	0	1	0	1
ANKRD50	0	0	0	0	0	0	1	0	1
SACS	0	0	0	0	0	0	1	0	1
GFRA1	0	0	0	0	0	0	1	0	1
CACUL1	0	0	0	0	0	0	1	0	1
PTPN14	0	0	0	0	0	0	1	0	1
ATP5F1A	0	0	0	0	0	0	1	0	1
GUCY1A2	0	0	0	0	0	0	1	0	1
GJA1	0	0	0	0	0	0	1	0	1
HNRNPDL	0	0	0	0	0	0	1	0	1
SRP19	0	0	0	0	0	0	1	0	1
SCOC	0	0	0	0	0	0	1	0	1
RANBP2	0	0	0	0	0	0	1	0	1
ASAP1	0	0	0	0	0	0	1	0	1
TMEM251	0	0	0	0	0	0	1	0	1
CMIP	0	0	0	0	0	0	1	0	1
CEBPG	0	0	0	0	0	0	1	0	1
CHD1	0	0	0	0	0	0	1	0	1
MSI2	0	0	0	0	0	0	1	0	1
NUS1	0	0	0	0	0	0	1	0	1
OTULIN	0	0	0	0	0	0	1	0	1
ENAH	0	0	0	0	0	0	1	0	1
BUB3	0	0	0	0	0	0	1	0	1
ATP5MC3	0	0	0	0	0	0	1	0	1
VOPP1	0	0	0	0	0	0	1	0	1
APOOL	0	0	0	0	0	0	1	0	1
PTPRN2	0	0	0	0	0	0	1	0	1
AZIN1	0	0	0	0	0	0	1	0	1
PIP4P2	0	0	0	0	0	0	1	0	1
NUP205	0	0	0	0	0	0	1	0	1
GNAQ	0	0	0	0	0	0	1	0	1
NPTN	0	0	0	0	0	0	1	0	1
SAMD8	0	0	0	0	0	0	1	0	1
BAG4	0	0	0	0	0	0	1	0	1
MFSD14A	0	0	0	0	0	0	1	0	1
EIF4A2	0	0	0	0	0	0	1	0	1
ZNF618	0	0	0	0	0	0	1	0	1
FMNL2	0	0	0	0	0	0	1	0	1
CUL4B	0	0	0	0	0	0	1	0	1
CDC42SE2	0	0	0	0	0	0	1	0	1
RAPGEF6	0	0	0	0	0	0	1	0	1
IFNGR2	0	0	0	0	0	0	1	0	1
UBE2Z	0	0	0	0	0	0	1	0	1
THEM4	0	0	0	0	0	0	1	0	1
AMFR	0	0	0	0	0	0	1	0	1
RSPRY1	0	0	0	0	0	0	1	0	1
TAOK1	0	0	0	0	0	0	1	0	1
UBE2Q1	0	0	0	0	0	0	1	0	1
PAQR6	0	0	0	0	0	0	1	0	1
IER2	0	0	0	0	0	0	1	0	1
LY6E	0	0	0	0	0	0	1	0	1
SQSTM1	0	0	0	0	0	0	1	0	1
POLR3K	0	0	0	0	0	0	1	0	1
SHANK2	0	0	0	0	0	0	1	0	1
PLPP3	0	0	0	0	0	0	1	0	1
ZNF326	0	0	0	0	0	0	1	0	1
SLC30A7	0	0	0	0	0	0	1	0	1
NCSTN	0	0	0	0	0	0	1	0	1
PDLIM5	0	0	0	0	0	0	1	0	1
CGGBP1	0	0	0	0	0	0	1	0	1
GPR155	0	0	0	0	0	0	1	0	1
HIPK1	0	0	0	0	0	0	1	0	1
CLASP2	0	0	0	0	0	0	1	0	1
NUAK2	0	0	0	0	0	0	1	0	1
WDFY3	0	0	0	0	0	0	1	0	1
PRICKLE2	0	0	0	0	0	0	1	0	1
PPM1K	0	0	0	0	0	0	1	0	1
PTX3	0	0	0	0	0	0	1	0	1
SLMAP	0	0	0	0	0	0	1	0	1
S100P	0	0	0	0	0	0	1	0	1
H2AZ1	0	0	0	0	0	0	1	0	1
HSPA4L	0	0	0	0	0	0	1	0	1
HMGB2	0	0	0	0	0	0	1	0	1
TMEM161B	0	0	0	0	0	0	1	0	1
ELOVL7	0	0	0	0	0	0	1	0	1
AGGF1	0	0	0	0	0	0	1	0	1
GRPEL2	0	0	0	0	0	0	1	0	1
SFXN1	0	0	0	0	0	0	1	0	1
ZNF12	0	0	0	0	0	0	1	0	1
OSGIN2	0	0	0	0	0	0	1	0	1
YWHAZ	0	0	0	0	0	0	1	0	1
SLC25A32	0	0	0	0	0	0	1	0	1
DCAF13	0	0	0	0	0	0	1	0	1
PDP1	0	0	0	0	0	0	1	0	1
ZNF367	0	0	0	0	0	0	1	0	1
ARHGAP12	0	0	0	0	0	0	1	0	1
SUGT1	0	0	0	0	0	0	1	0	1
PGM2L1	0	0	0	0	0	0	1	0	1
REEP3	0	0	0	0	0	0	1	0	1
ARF6	0	0	0	0	0	0	1	0	1
PDZD8	0	0	0	0	0	0	1	0	1
DIPK1B	0	0	0	0	0	0	1	0	1
CACNB2	0	0	0	0	0	0	1	0	1
BAG5	0	0	0	0	0	0	1	0	1
TMEM100	0	0	0	0	0	0	1	0	1
TRIM44	0	0	0	0	0	0	1	0	1
IDH3A	0	0	0	0	0	0	1	0	1
TMX3	0	0	0	0	0	0	1	0	1
MFAP4	0	0	0	0	0	0	1	0	1
WEE1	0	0	0	0	0	0	1	0	1
HDGFL3	0	0	0	0	0	0	1	0	1
TERF2IP	0	0	0	0	0	0	1	0	1
PATL1	0	0	0	0	0	0	1	0	1
MARS1	0	0	0	0	0	0	1	0	1
MBD6	0	0	0	0	0	0	1	0	1
PBX3	0	0	0	0	0	0	1	0	1
TUBA1C	0	0	0	0	0	0	1	0	1
ZNF146	0	0	0	0	0	0	1	0	1
EEF2	0	0	0	0	0	0	1	0	1
TMEM88	0	0	0	0	0	0	1	0	1
SLC3A2	0	0	0	0	0	0	1	0	1
IRF2BP2	0	0	0	0	0	0	1	0	1
SLC20A2	0	0	0	0	0	0	1	0	1
ZBTB5	0	0	0	0	0	0	1	0	1
SNTB2	0	0	0	0	0	0	1	0	1
ZNF507	0	0	0	0	0	0	1	0	1
XPO6	0	0	0	0	0	0	1	0	1
SDC2	0	0	0	0	0	0	1	0	1
PCBP1	0	0	0	0	0	0	1	0	1
FASN	0	0	0	0	0	0	1	0	1
MAP3K2	0	0	0	0	0	0	1	0	1
YWHAG	0	0	0	0	0	0	1	0	1
USP47	0	0	0	0	0	0	1	0	1
ADORA2B	0	0	0	0	0	0	1	0	1
RALGAPB	0	0	0	0	0	0	1	0	1
LONRF2	0	0	0	0	0	0	1	0	1
PPM1D	0	0	0	0	0	0	1	0	1
GPR27	0	0	0	0	0	0	1	0	1
KBTBD2	0	0	0	0	0	0	1	0	1
TANC2	0	0	0	0	0	0	1	0	1
C11orf24	0	0	0	0	0	0	1	0	1
SOCS5	0	0	0	0	0	0	1	0	1
TMEM126B	0	0	0	0	0	0	1	0	1
TRIM8	0	0	0	0	0	0	1	0	1
TVP23B	0	0	0	0	0	0	1	0	1
JMJD1C	0	0	0	0	0	0	1	0	1
NEGR1	0	0	0	0	0	0	1	0	1
GNG12	0	0	0	0	0	0	1	0	1
EFEMP2	0	0	0	0	0	0	1	0	1
DCP2	0	0	0	0	0	0	1	0	1
MYEOV	0	0	0	0	0	0	1	0	1
TADA2B	0	0	0	0	0	0	1	0	1
COQ2	0	0	0	0	0	0	1	0	1
RAPH1	0	0	0	0	0	0	1	0	1
TNKS	0	0	0	0	0	0	1	0	1
DAG1	0	0	0	0	0	0	1	0	1
MOB1B	0	0	0	0	0	0	1	0	1
SCAI	0	0	0	0	0	0	1	0	1
BCLAF3	0	0	0	0	0	0	1	0	1
CBX2	0	0	0	0	0	0	1	0	1
FAM174A	0	0	0	0	0	0	1	0	1
LIG4	0	0	0	0	0	0	1	0	1
ZCCHC12	0	0	0	0	0	0	1	0	1
SLC29A2	0	0	0	0	0	0	1	0	1
RESF1	0	0	0	0	0	0	1	0	1
NR1D2	0	0	0	0	0	0	1	0	1
DENND6A	0	0	0	0	0	0	1	0	1
SLC22A1	0	0	0	0	0	0	1	0	1
VCPIP1	0	0	0	0	0	0	1	0	1
SMAD2	0	0	0	0	0	0	1	0	1
LONRF3	0	0	0	0	0	0	1	0	1
SFN	0	0	0	0	0	0	1	0	1
SPRYD4	0	0	0	0	0	0	1	0	1
FAM91A1	0	0	0	0	0	0	1	0	1
PNMA1	0	0	0	0	0	0	1	0	1
RPS6KA3	0	0	0	0	0	0	1	0	1
TGIF1	0	0	0	0	0	0	1	0	1
TBL1XR1	0	0	0	0	0	0	1	0	1
CD163L1	0	0	0	0	0	0	1	0	1
AP3S1	0	0	0	0	0	0	1	0	1
UBE2N	0	0	0	0	0	0	1	0	1
PLEC	0	0	0	0	0	0	1	0	1
C5orf46	0	0	0	0	0	0	1	0	1
MRFAP1	0	0	0	0	0	0	1	0	1
ZNF664	0	0	0	0	0	0	1	0	1
FJX1	0	0	0	0	0	0	1	0	1
SLITRK4	0	0	0	0	0	0	1	0	1
GCC1	0	0	0	0	0	0	1	0	1
NRXN1	0	0	0	0	0	0	1	0	1
ZNRF2	0	0	0	0	0	0	1	0	1
PAK2	0	0	0	0	0	0	1	0	1
GAS1	0	0	0	0	0	0	1	0	1
MIGA1	0	0	0	0	0	0	1	0	1
DHTKD1	0	0	0	0	0	0	1	0	1
ZNF678	0	0	0	0	0	0	1	0	1
RAP2B	0	0	0	0	0	0	1	0	1
DIPK2A	0	0	0	0	0	0	1	0	1
C5orf24	0	0	0	0	0	0	1	0	1
IST1	0	0	0	0	0	0	1	0	1
ZSCAN22	0	0	0	0	0	0	1	0	1
TTC3	0	0	0	0	0	0	1	0	1
PPP1R27	0	0	0	0	0	0	1	0	1
PAQR7	0	0	0	0	0	0	1	0	1
PAPPA	0	0	0	0	0	0	1	0	1
C16orf72	0	0	0	0	0	0	1	0	1
KIAA2026	0	0	0	0	0	0	1	0	1
FHL3	0	0	0	0	0	0	1	0	1
RIPK4	0	0	0	0	0	0	1	0	1
NOG	0	0	0	0	0	0	1	0	1
IQGAP3	0	0	0	0	0	0	1	0	1
DENND5A	0	0	0	0	0	0	1	0	1
PPP1R2	0	0	0	0	0	0	1	0	1
PCDH9	0	0	0	0	0	0	1	0	1
H2BC21	0	0	0	0	0	0	1	0	1
SUMO3	0	0	0	0	0	0	1	0	1
NSMCE3	0	0	0	0	0	0	1	0	1
SP1	0	0	0	0	0	0	1	0	1
GNG2	0	0	0	0	0	0	1	0	1
RGS7BP	0	0	0	0	0	0	1	0	1
NF2	0	0	0	0	0	0	1	0	1
ZFP91	0	0	0	0	0	0	1	0	1
HEXIM1	0	0	0	0	0	0	1	0	1
USP7	0	0	0	0	0	0	1	0	1
TET3	0	0	0	0	0	0	1	0	1
ZC3H6	0	0	0	0	0	0	1	0	1
SRSF10	0	0	0	0	0	0	1	0	1
SMIM15	0	0	0	0	0	0	1	0	1
CLDN4	0	0	0	0	0	0	1	0	1
FAT4	0	0	0	0	0	0	1	0	1
LONP1	0	0	0	0	0	0	1	0	1
NCOR2	0	0	0	0	0	0	1	0	1
HDAC2	0	0	0	0	0	0	1	0	1
NF1	0	0	0	0	0	0	1	0	1
PPTC7	0	0	0	0	0	0	1	0	1
SLC39A10	0	0	0	0	0	0	1	0	1
ZNF585A	0	0	0	0	0	0	1	0	1
H4C3	0	0	0	0	0	0	1	0	1
IGF2R	0	0	0	0	0	0	1	0	1
MIRLET7BHG	0	0	0	0	0	0	1	0	1
ENTPD4	0	0	0	0	0	0	1	0	1
PDGFA	0	0	0	0	0	0	1	0	1
MYO5A	0	0	0	0	0	0	1	0	1
PSAP	0	0	0	0	0	0	1	0	1
S100A10	0	0	0	0	0	0	1	0	1
MAK16	0	0	0	0	0	0	1	0	1
CD2AP	0	0	0	0	0	0	1	0	1
MAN1A2	0	0	0	0	0	0	1	0	1
GFPT1	0	0	0	0	0	0	1	0	1
MAFK	0	0	0	0	0	0	1	0	1
TLK1	0	0	0	0	0	0	1	0	1
COPS8	0	0	0	0	0	0	1	0	1
MT-ND5	0	0	0	0	0	0	1	0	1
MT-ND3	0	0	0	0	0	0	1	0	1
DCAF12	0	0	0	0	0	0	1	0	1
MT-ND4	0	0	0	0	0	0	1	0	1
PRC1	0	0	0	0	0	0	1	0	1
HSD17B8	0	0	0	0	0	0	1	0	1
SPIN3	0	0	0	0	0	0	1	0	1
NOTCH4	0	0	0	0	0	0	1	0	1
PPP1R11	0	0	0	0	0	0	1	0	1
TCTN1	0	0	0	0	0	0	1	0	1
TRIQK	0	0	0	0	0	0	1	0	1
PDE7A	0	0	0	0	0	0	1	0	1
ITPRIPL2	0	0	0	0	0	0	1	0	1
PLPP6	0	0	0	0	0	0	1	0	1
STK38L	0	0	0	0	0	0	1	0	1
REPIN1	0	0	0	0	0	0	1	0	1
ALG3	0	0	0	0	0	0	1	0	1
FNIP1	0	0	0	0	0	0	1	0	1
PPP3R1	0	0	0	0	0	0	1	0	1
FADS3	0	0	0	0	0	0	1	0	1
SMIM13	0	0	0	0	0	0	1	0	1
PRAF2	0	0	0	0	0	0	1	0	1
ATXN7L3B	0	0	0	0	0	0	1	0	1
ZNF260	0	0	0	0	0	0	1	0	1
MEX3A	0	0	0	0	0	0	1	0	1
EID1	0	0	0	0	0	0	1	0	1
CUX1	0	0	0	0	0	0	1	0	1
RBM15B	0	0	0	0	0	0	1	0	1
TMEM178B	0	0	0	0	0	0	1	0	1
TAF9	0	0	0	0	0	0	1	0	1
SYNRG	0	0	0	0	0	0	1	0	1
MARCKS	0	0	0	0	0	0	1	0	1
UNK	0	0	0	0	0	0	0	1	1
PYGB	0	0	0	0	0	0	0	1	1
PIAS4	0	0	0	0	0	0	0	1	1
JUNB	0	0	0	0	0	0	0	1	1
PCYT2	0	0	0	0	0	0	0	1	1
	0	0	0	0	0	0	0	0	0

## Sheet: S4 CL
Target	hsa-miR-1260b & hsa-miR-369-3p	hsa-let-7f-5p & hsa-miR-125b-5p	hsa-miR-128-3p & hsa-miR-216b-5p	hsa-miR-103a-3p & hsa-miR-128-3p	hsa-let-7a-5p & hsa-miR-125b-5p	hsa-miR-204-3p & hsa-miR-215-5p	hsa-miR-30d-5p & hsa-miR-1260b	Sum
UHMK1	1	1	0	1	1	0	1	5
APP	0	1	1	1	1	0	1	5
VCPIP1	1	1	0	0	1	0	1	4
TNPO1	1	0	1	1	0	0	1	4
QKI	1	0	0	1	1	0	1	4
STX16	1	1	0	0	1	0	1	4
TAOK1	1	1	0	0	1	0	1	4
CCNT2	0	1	1	1	1	0	0	4
DYRK2	0	1	1	1	1	0	0	4
LARP1	0	1	1	1	1	0	0	4
AGO1	0	1	0	1	1	0	1	4
RBM12B	0	1	1	1	1	0	0	4
MATR3	0	1	1	1	1	0	0	4
RORA	0	1	1	1	1	0	0	4
XPO1	0	1	0	1	1	0	1	4
CSNK2A1	0	1	1	1	1	0	0	4
CDK6	0	1	1	1	1	0	0	4
DDX6	0	1	1	1	1	0	0	4
FOXM1	0	1	1	1	1	0	0	4
E2F3	0	1	0	1	1	0	1	4
GLS	0	1	1	1	1	0	0	4
AGO2	0	1	0	1	1	1	0	4
MAP1B	0	1	1	1	1	0	0	4
BRD4	0	1	0	1	1	0	1	4
PARP1	0	1	1	0	1	0	1	4
BTG2	0	1	0	1	1	1	0	4
KLHL15	0	1	1	1	1	0	0	4
BMPR2	0	1	1	1	1	0	0	4
CRK	1	1	0	0	1	0	0	3
HIPK1	1	0	0	1	0	0	1	3
MYLIP	1	0	1	0	0	0	1	3
LATS1	1	0	0	1	0	0	1	3
MFSD14A	1	0	0	1	0	0	1	3
PRDM1	0	1	0	0	1	0	1	3
CDKN1A	0	1	0	1	1	0	0	3
CTPS1	0	1	0	0	1	0	1	3
DYNC1LI2	0	1	0	1	1	0	0	3
EIF4G2	0	1	0	1	1	0	0	3
HMGA1	0	1	0	1	1	0	0	3
PLAGL2	0	1	0	1	1	0	0	3
SP1	0	1	0	1	1	0	0	3
KMT2D	0	1	0	1	1	0	0	3
HMGA2	0	1	0	1	1	0	0	3
TGOLN2	0	1	1	0	1	0	0	3
ZNF460	0	1	0	0	1	0	1	3
ZBTB37	0	1	0	1	1	0	0	3
PAFAH1B1	0	1	0	1	1	0	0	3
PKD1	0	1	0	1	1	0	0	3
CSDE1	0	1	0	1	1	0	0	3
IKZF2	0	1	0	0	1	0	1	3
VCAN	0	1	0	1	1	0	0	3
CTNNA1	0	1	0	1	1	0	0	3
SPEN	0	1	0	1	1	0	0	3
TFRC	0	1	0	1	1	0	0	3
STARD7	0	1	0	1	1	0	0	3
REST	0	1	0	1	1	0	0	3
KHSRP	0	1	0	1	1	0	0	3
TNRC6A	0	1	1	0	1	0	0	3
DICER1	0	1	0	1	1	0	0	3
YY1	0	1	0	0	1	1	0	3
HBP1	0	1	0	1	1	0	0	3
PLEKHA8	0	1	0	0	1	0	1	3
MED13	0	1	0	1	1	0	0	3
HIPK3	0	1	0	1	1	0	0	3
LMNB1	0	1	0	1	1	0	0	3
ID2	0	1	0	1	1	0	0	3
MTR	0	1	0	0	1	0	1	3
ARID1A	0	1	0	1	1	0	0	3
PLAGL1	0	1	0	1	1	0	0	3
HELLS	0	1	0	1	1	0	0	3
PDS5A	0	1	0	1	1	0	0	3
AHNAK	0	1	0	1	1	0	0	3
CNOT1	0	1	0	1	1	0	0	3
BMP2	0	1	1	0	1	0	0	3
AGO3	0	1	0	1	1	0	0	3
BTBD3	0	1	0	1	1	0	0	3
CDCA8	0	1	0	1	1	0	0	3
LRRC8A	0	1	0	1	1	0	0	3
IRF4	0	1	0	1	1	0	0	3
DUSP6	0	1	0	1	1	0	0	3
TMBIM6	0	1	0	1	1	0	0	3
SBNO1	0	1	0	0	1	0	1	3
ZFHX3	0	1	0	1	1	0	0	3
SSH2	0	1	1	0	1	0	0	3
TP53	0	1	0	1	1	0	0	3
ABL2	0	1	0	1	1	0	0	3
MBOAT2	0	1	0	1	1	0	0	3
LRIG1	0	1	0	1	1	0	0	3
G3BP1	0	1	0	0	1	0	1	3
MMS22L	0	1	0	1	1	0	0	3
MTDH	0	1	0	1	1	0	0	3
MKI67	0	1	0	1	1	0	0	3
LIN7C	0	1	0	1	1	0	0	3
HNRNPU	0	1	0	1	1	0	0	3
RANBP2	0	1	0	0	1	0	1	3
SON	0	1	0	1	1	0	0	3
WDR26	0	1	0	0	1	0	1	3
EEF2	0	1	0	1	1	0	0	3
RAB4A	0	1	0	1	1	0	0	3
CRTAP	0	1	0	1	1	0	0	3
CDCA4	0	1	0	0	1	0	1	3
LCLAT1	0	1	0	0	1	0	1	3
TRIB1	0	1	0	1	1	0	0	3
AURKB	0	1	0	1	1	0	0	3
EHMT1	0	1	0	1	1	0	0	3
IST1	0	1	0	1	1	0	0	3
ZNF703	0	1	0	1	1	0	0	3
PCDH9	0	1	0	1	1	0	0	3
H2AX	0	1	0	1	1	0	0	3
TSPYL1	0	1	0	0	1	0	1	3
FLNA	0	1	0	1	1	0	0	3
SLC5A3	0	0	1	1	1	0	0	3
NUFIP2	0	0	1	1	0	0	1	3
NUCKS1	0	0	1	1	1	0	0	3
BAZ2A	0	0	1	1	1	0	0	3
ATP13A3	0	0	1	1	0	0	1	3
ARL6IP1	0	0	1	1	0	0	1	3
TMCC1	0	0	1	1	0	0	1	3
TOB2	0	0	1	1	1	0	0	3
SFT2D2	0	0	1	1	0	0	1	3
PKM	1	0	0	0	1	0	0	2
PURA	1	0	0	1	0	0	0	2
SP3	1	0	0	0	0	0	1	2
TSC22D2	1	0	0	1	0	0	0	2
LHFPL2	1	0	0	0	0	0	1	2
GATAD2B	1	0	0	1	0	0	0	2
ENPP5	1	0	0	0	0	0	1	2
ATAD1	1	0	0	0	0	0	1	2
SELENOI	1	0	0	0	0	0	1	2
MAP4	1	0	0	0	0	0	1	2
PPM1A	1	0	0	0	0	0	1	2
BLOC1S6	1	0	0	0	0	0	1	2
SLC38A1	1	0	0	0	0	0	1	2
PHACTR2	1	0	0	0	0	0	1	2
RAB22A	1	0	0	1	0	0	0	2
MPRIP	1	0	0	1	0	0	0	2
RNF44	1	0	0	0	0	0	1	2
PCDH19	1	0	0	0	0	0	1	2
PAFAH1B2	1	0	0	0	0	0	1	2
JMJD1C	1	0	1	0	0	0	0	2
ZMAT3	1	0	0	1	0	0	0	2
KCTD12	1	0	0	0	0	0	1	2
NAP1L1	1	0	0	0	0	0	1	2
NBR1	1	0	0	0	0	0	1	2
HNRNPUL2	1	0	0	0	0	0	1	2
ATXN7L3B	1	0	0	0	0	0	1	2
AMD1	0	1	0	0	1	0	0	2
ATP2A2	0	1	0	0	1	0	0	2
ATP5F1B	0	1	0	0	1	0	0	2
BACH1	0	1	0	0	1	0	0	2
CALU	0	1	0	0	1	0	0	2
CD59	0	1	0	0	1	0	0	2
ARID3A	0	1	0	0	1	0	0	2
EDN1	0	1	0	0	1	0	0	2
EPHA4	0	1	0	0	1	0	0	2
NR6A1	0	1	0	0	1	0	0	2
IGF1R	0	1	0	0	1	0	0	2
IL6R	0	1	0	0	1	0	0	2
MXD1	0	1	0	0	1	0	0	2
MYH9	0	1	0	0	1	0	0	2
SLC11A2	0	1	0	0	1	0	0	2
OPRL1	0	1	0	0	1	0	0	2
PMAIP1	0	1	0	0	1	0	0	2
SMARCC1	0	1	0	0	1	0	0	2
SOD2	0	1	0	0	1	0	0	2
STRN	0	1	0	0	1	0	0	2
STX3	0	1	0	0	1	0	0	2
THBS1	0	1	0	0	1	0	0	2
VCL	0	1	0	0	1	0	0	2
ZNF8	0	1	0	0	1	0	0	2
NCOA3	0	1	0	0	1	0	0	2
CLDN12	0	1	0	0	1	0	0	2
ATP6V1G1	0	1	0	0	1	0	0	2
NUP155	0	1	0	0	1	0	0	2
HERPUD1	0	1	0	0	1	0	0	2
SNX17	0	1	0	0	1	0	0	2
AREL1	0	1	0	0	1	0	0	2
UBAP2L	0	1	0	0	1	0	0	2
ARID3B	0	1	0	0	1	0	0	2
IGF2BP1	0	1	0	0	1	0	0	2
HNRNPUL1	0	1	0	0	1	0	0	2
ATXN2L	0	1	0	0	1	0	0	2
IKZF3	0	1	0	0	1	0	0	2
PLXND1	0	1	0	0	1	0	0	2
PLD3	0	1	0	0	1	0	0	2
BCOR	0	1	0	0	1	0	0	2
SEMA4C	0	1	0	0	1	0	0	2
FIGN	0	1	0	0	1	0	0	2
YOD1	0	1	0	0	1	0	0	2
FAM222B	0	1	0	0	1	0	0	2
MTUS1	0	1	0	0	1	0	0	2
ADIPOR2	0	1	0	0	1	0	0	2
EDEM3	0	1	0	0	1	0	0	2
FBXL20	0	1	0	0	1	0	0	2
FMNL3	0	1	0	0	1	0	0	2
TRIM71	0	1	0	0	1	0	0	2
GPAT4	0	1	0	0	1	0	0	2
TXLNA	0	1	0	0	1	0	0	2
KCTD21	0	1	0	0	1	0	0	2
CDC27	0	1	0	0	1	0	0	2
DHX33	0	1	0	0	1	0	0	2
GDE1	0	1	0	0	1	0	0	2
COX10	0	1	0	0	1	0	0	2
HIVEP2	0	1	0	0	1	0	0	2
LYPLA2	0	1	0	0	1	0	0	2
ALOX5	0	1	0	0	1	0	0	2
XYLT2	0	1	0	0	1	0	0	2
RUFY3	0	1	0	0	1	0	0	2
UBR2	0	1	0	0	1	0	0	2
KPNA6	0	1	0	0	1	0	0	2
CHPF2	0	1	0	0	1	0	0	2
UBA6	0	1	0	0	1	0	0	2
DSG2	0	1	0	0	1	0	0	2
TPR	0	1	0	0	1	0	0	2
FAM120A	0	1	0	0	1	0	0	2
CUL1	0	1	0	0	1	0	0	2
AC022966.1	0	1	0	0	1	0	0	2
RC3H2	0	1	0	0	1	0	0	2
ZC3H11A	0	1	0	0	1	0	0	2
NDC1	0	1	0	0	1	0	0	2
QSER1	0	1	0	0	1	0	0	2
BCAT1	0	1	0	0	1	0	0	2
TNPO3	0	1	0	0	1	0	0	2
CDK13	0	1	0	0	1	0	0	2
SEL1L	0	1	0	0	1	0	0	2
NFATC3	0	1	0	0	1	0	0	2
PICALM	0	1	0	0	1	0	0	2
FNDC3B	0	1	0	0	1	0	0	2
NT5C2	0	1	0	0	1	0	0	2
FGFR1	0	1	0	0	1	0	0	2
TNRC6C	0	1	0	1	0	0	0	2
SENP1	0	1	0	0	1	0	0	2
DELE1	0	1	0	0	1	0	0	2
NFE2L1	0	1	0	0	1	0	0	2
FAT1	0	1	0	0	1	0	0	2
HUWE1	0	1	0	0	1	0	0	2
MTMR2	0	1	0	0	1	0	0	2
CDIP1	0	1	0	0	1	0	0	2
TMEM101	0	1	0	0	1	0	0	2
EZR	0	1	0	0	1	0	0	2
ARCN1	0	1	0	0	1	0	0	2
WAC	0	1	0	0	1	0	0	2
SCD	0	1	0	0	1	0	0	2
FBXL19	0	1	0	0	1	0	0	2
CRKL	0	1	0	0	1	0	0	2
DDX17	0	1	0	0	1	0	0	2
AP1B1	0	1	0	0	1	0	0	2
FAM118A	0	1	0	0	1	0	0	2
CHD8	0	1	0	1	0	0	0	2
ZMYND8	0	1	0	0	1	0	0	2
ADNP	0	1	0	0	1	0	0	2
NELFCD	0	1	0	0	1	0	0	2
SMAD7	0	1	0	0	1	0	0	2
CDK16	0	1	0	0	1	0	0	2
SLC7A6	0	1	0	0	1	0	0	2
MON1B	0	1	0	0	1	0	0	2
UBE2I	0	1	0	0	1	0	0	2
MAZ	0	1	0	0	1	0	0	2
RAB11A	0	1	0	0	1	0	0	2
HOMER2	0	1	0	0	1	0	0	2
UBE2W	0	1	0	0	1	0	0	2
KDELR1	0	1	0	0	1	0	0	2
CCNJ	0	1	0	0	1	0	0	2
RAB11FIP2	0	1	0	0	1	0	0	2
PLEKHA1	0	1	0	0	1	0	0	2
PPIF	0	1	0	0	1	0	0	2
TSPAN14	0	1	0	0	1	0	0	2
RNF167	0	1	0	0	1	0	0	2
RAPGEF2	0	1	0	0	1	0	0	2
HTATIP2	0	1	0	0	1	0	0	2
PRDM4	0	1	0	0	1	0	0	2
CORO1C	0	1	0	0	1	0	0	2
MLEC	0	1	0	0	1	0	0	2
CSRNP2	0	1	0	0	1	0	0	2
PTGES3	0	1	0	0	1	0	0	2
CDKN1B	0	1	0	0	1	0	0	2
PTP4A1	0	1	0	0	1	0	0	2
SRF	0	1	0	0	1	0	0	2
NNT	0	1	0	0	1	0	0	2
PPP2CA	0	1	0	0	1	0	0	2
SEC24A	0	1	0	0	1	0	0	2
STC2	0	1	0	0	1	0	0	2
MOB1A	0	1	0	0	1	0	0	2
TTL	0	1	0	0	1	0	0	2
ACTR3	0	1	0	0	1	0	0	2
LANCL1	0	1	0	0	1	0	0	2
BCL9	0	1	0	0	1	0	0	2
CHD5	0	1	0	0	1	0	0	2
ETV3	0	1	0	0	1	0	0	2
MAPKAP1	0	1	0	0	1	0	0	2
WDR11	0	1	0	0	1	0	0	2
ETF1	0	1	0	0	1	0	0	2
DUSP4	0	1	0	0	1	0	0	2
GPSM2	0	1	0	0	1	0	0	2
NR4A1	0	1	0	0	1	0	0	2
TMEM189-UBE2V1	0	1	0	0	1	0	0	2
SOX4	0	1	0	0	1	0	0	2
ATXN1	0	1	0	0	1	0	0	2
MAX	0	1	0	0	1	0	0	2
TUBGCP3	0	1	0	0	1	0	0	2
THRA	0	1	0	0	1	0	0	2
EMC1	0	1	0	0	1	0	0	2
CLN6	0	1	0	0	1	0	0	2
VPS13C	0	1	0	0	1	0	0	2
LDLR	0	1	0	0	1	0	0	2
LRCH2	0	1	0	0	1	0	0	2
ZSWIM6	0	1	0	0	1	0	0	2
SAMD10	0	1	0	0	1	0	0	2
EIF2S3	0	1	0	0	1	0	0	2
SYNE1	0	1	0	0	1	0	0	2
ACLY	0	1	0	0	1	0	0	2
SERINC3	0	1	0	0	1	0	0	2
STARD13	0	1	0	0	1	0	0	2
KMT5C	0	1	0	0	1	0	0	2
SLC38A2	0	1	0	0	1	0	0	2
APC	0	1	0	0	1	0	0	2
CEMIP2	0	1	0	0	1	0	0	2
PSAT1	0	1	0	0	1	0	0	2
EPHA7	0	1	0	0	1	0	0	2
CAPRIN1	0	1	0	0	1	0	0	2
VPS36	0	1	0	0	1	0	0	2
RAPGEF5	0	1	0	0	1	0	0	2
VEZF1	0	1	0	0	1	0	0	2
MARCHF7	0	1	0	0	1	0	0	2
NIBAN2	0	1	0	0	1	0	0	2
DPM2	0	1	0	0	1	0	0	2
YAP1	0	1	0	0	1	0	0	2
CASP6	0	1	0	0	1	0	0	2
VPS37B	0	1	0	0	1	0	0	2
NCOA2	0	1	0	0	1	0	0	2
GFOD2	0	1	0	0	1	0	0	2
PCTP	0	1	0	0	1	0	0	2
C17orf80	0	1	0	0	1	0	0	2
TRIM65	0	1	0	0	1	0	0	2
IGSF3	0	1	0	0	1	0	0	2
POGK	0	1	0	0	1	0	0	2
POU2F1	0	1	0	0	1	0	0	2
C1orf43	0	1	0	0	1	0	0	2
ARF1	0	1	0	1	0	0	0	2
GIGYF1	0	1	0	0	1	0	0	2
OGT	0	1	0	0	1	0	0	2
MFHAS1	0	1	0	0	1	0	0	2
ATP6V1B2	0	1	0	0	1	0	0	2
SIGMAR1	0	1	0	0	1	0	0	2
NTRK2	0	1	0	0	1	0	0	2
EIF4EBP2	0	1	0	0	1	0	0	2
TMEM138	0	1	0	0	1	0	0	2
SOGA1	0	1	0	0	1	0	0	2
MTMR12	0	1	0	0	1	0	0	2
ANKRD50	0	1	0	0	1	0	0	2
SACS	0	1	0	0	1	0	0	2
DST	0	1	0	0	1	0	0	2
PTPN14	0	1	0	0	1	0	0	2
EPG5	0	1	0	0	1	0	0	2
PTPRD	0	1	0	0	1	0	0	2
CHD1	0	1	0	0	1	0	0	2
ADAMTS1	0	1	0	0	1	0	0	2
ADAMTS5	0	1	0	0	1	0	0	2
PSD3	0	1	0	0	1	0	0	2
TIAM1	0	1	0	0	1	0	0	2
FCHO2	0	1	0	0	1	0	0	2
UBN2	0	1	0	0	1	0	0	2
WASF2	0	1	0	0	1	0	0	2
CNOT11	0	1	0	0	1	0	0	2
DEDD	0	1	0	0	1	0	0	2
B4GALT3	0	1	0	0	1	0	0	2
SIM2	0	1	0	0	1	0	0	2
NBEAL2	0	1	0	0	1	0	0	2
ZNF385A	0	1	0	0	1	0	0	2
KIAA1522	0	1	0	0	1	0	0	2
ZNF281	0	1	0	0	1	0	0	2
PEX13	0	1	0	0	1	0	0	2
LRRC58	0	1	0	0	1	0	0	2
TASOR	0	1	0	0	1	0	0	2
SHISA5	0	1	0	0	1	0	0	2
ACSL6	0	1	0	0	1	0	0	2
ZNF12	0	1	0	0	1	0	0	2
DLC1	0	1	0	0	1	0	0	2
TP53INP1	0	1	0	0	1	0	0	2
SLITRK5	0	1	0	0	1	0	0	2
QSOX2	0	1	0	0	1	0	0	2
HIF1AN	0	1	0	0	1	0	0	2
FBN1	0	1	0	0	1	0	0	2
PIP4K2C	0	1	0	0	1	0	0	2
URM1	0	1	0	0	1	0	0	2
C15orf39	0	1	0	0	1	0	0	2
IGF2	0	1	0	0	1	0	0	2
CDK12	0	1	0	0	1	0	0	2
SRRM2	0	1	0	0	1	0	0	2
KIF5C	0	1	0	0	1	0	0	2
RFWD3	0	1	0	0	1	0	0	2
STAT3	0	1	0	0	1	0	0	2
TET2	0	1	0	0	1	0	0	2
GFM1	0	1	0	0	1	0	0	2
SIN3A	0	1	0	0	1	0	0	2
CLIC4	0	1	0	0	1	0	0	2
HNRNPF	0	1	0	0	1	0	0	2
ZNF768	0	1	0	0	1	0	0	2
MAP3K2	0	1	0	0	1	0	0	2
YWHAG	0	1	0	0	1	0	0	2
PWWP2A	0	1	0	0	1	0	0	2
INSR	0	1	0	0	1	0	0	2
CHD7	0	1	0	0	1	0	0	2
BCL2	0	1	0	0	1	0	0	2
NEGR1	0	1	0	0	1	0	0	2
PPP1CA	0	1	0	0	1	0	0	2
DCP2	0	1	0	0	1	0	0	2
PHF8	0	1	0	0	1	0	0	2
STOX2	0	1	0	0	1	0	0	2
HEG1	0	1	0	0	1	0	0	2
FBXO45	0	1	0	0	1	0	0	2
MGA	0	1	0	0	1	0	0	2
CNTNAP2	0	1	0	0	1	0	0	2
EIF1AD	0	1	0	0	1	0	0	2
B3GNT5	0	1	0	0	1	0	0	2
SEC24C	0	1	0	0	1	0	0	2
ZBTB34	0	1	0	0	1	0	0	2
RIMKLA	0	1	0	0	1	0	0	2
PUS1	0	1	0	0	1	0	0	2
CHD9	0	1	0	0	1	0	0	2
KCNA2	0	1	0	0	1	0	0	2
PDE4DIP	0	1	0	0	1	0	0	2
SH2B1	0	1	0	0	1	0	0	2
EIF3K	0	1	0	0	1	0	0	2
GPR157	0	1	0	0	1	0	0	2
ZNF792	0	1	0	0	1	0	0	2
AEN	0	1	0	0	1	0	0	2
MUC16	0	1	0	0	1	0	0	2
PRKAG1	0	1	0	0	1	0	0	2
NOP10	0	1	0	0	1	0	0	2
CREB3L2	0	1	0	0	1	0	0	2
MFSD5	0	1	0	0	1	0	0	2
ACTG1	0	1	0	0	1	0	0	2
PBX1	0	1	0	0	1	0	0	2
BRWD1	0	1	0	0	1	0	0	2
YTHDF3	0	1	0	0	1	0	0	2
DMWD	0	1	0	0	1	0	0	2
TEAD1	0	1	0	0	1	0	0	2
TET3	0	1	0	0	1	0	0	2
LIN28B	0	1	0	0	1	0	0	2
EIF4EBP1	0	1	0	0	1	0	0	2
NDOR1	0	1	0	0	1	0	0	2
TMEM201	0	1	0	0	1	0	0	2
ZNF292	0	1	0	0	1	0	0	2
ARID2	0	1	0	0	1	0	0	2
TMEM63A	0	1	0	0	1	0	0	2
NCOR2	0	1	0	0	1	0	0	2
NOL4L	0	1	0	0	1	0	0	2
C1D	0	1	0	0	1	0	0	2
ZNF121	0	1	0	0	1	0	0	2
QRICH1	0	1	0	0	1	0	0	2
NRARP	0	1	0	0	1	0	0	2
PRRC2A	0	1	0	0	1	0	0	2
ZNF805	0	1	0	0	1	0	0	2
RNPS1	0	1	0	0	1	0	0	2
NRAS	0	1	0	0	1	0	0	2
LEPROT	0	1	0	0	1	0	0	2
RTL10	0	1	0	0	1	0	0	2
DDX3X	0	1	0	0	1	0	0	2
SMIM13	0	1	0	0	1	0	0	2
PNMA2	0	1	0	0	1	0	0	2
ZNF260	0	1	0	0	1	0	0	2
KMT2B	0	1	0	0	1	0	0	2
PRKAA1	0	0	1	1	0	0	0	2
PTEN	0	0	1	1	0	0	0	2
ZBTB18	0	0	1	0	0	0	1	2
MBTD1	0	0	1	1	0	0	0	2
ZIC5	0	0	1	1	0	0	0	2
ESCO2	0	0	1	1	0	0	0	2
REV3L	0	0	1	1	0	0	0	2
GPRC5A	0	0	1	1	0	0	0	2
NCKAP1	0	0	1	1	0	0	0	2
MCM4	0	0	1	1	0	0	0	2
ERBIN	0	0	1	1	0	0	0	2
RTN4	0	0	1	1	0	0	0	2
HNRNPA2B1	0	0	1	1	0	0	0	2
ZWINT	0	0	1	1	0	0	0	2
DIAPH1	0	0	1	1	0	0	0	2
NAB1	0	0	1	1	0	0	0	2
ETNK1	0	0	1	1	0	0	0	2
MAP3K21	0	0	1	1	0	0	0	2
STOM	0	0	1	1	0	0	0	2
LPCAT1	0	0	1	1	0	0	0	2
PPM1K	0	0	1	1	0	0	0	2
WDR43	0	0	1	1	0	0	0	2
OTUD4	0	0	1	1	0	0	0	2
NSD1	0	0	1	1	0	0	0	2
GATAD2A	0	0	1	1	0	0	0	2
CDK1	0	0	1	1	0	0	0	2
PHC3	0	0	1	1	0	0	0	2
SPTY2D1	0	0	1	1	0	0	0	2
SF3B3	0	0	1	1	0	0	0	2
TBC1D9B	0	0	1	1	0	0	0	2
ASPH	0	0	1	1	0	0	0	2
SLC9A6	0	0	1	1	0	0	0	2
ARF6	0	0	0	1	1	0	0	2
CDC25A	0	0	0	1	1	0	0	2
HOXA3	0	0	0	1	1	0	0	2
SRSF1	0	0	0	1	0	0	1	2
FBXW7	0	0	0	1	0	0	1	2
CREBBP	0	0	0	1	1	0	0	2
NCAPD2	0	0	0	1	1	0	0	2
ENO1	0	0	0	1	0	0	1	2
APLP2	0	0	0	1	0	0	1	2
PXN	0	0	0	1	1	0	0	2
ABL1	0	0	0	1	1	0	0	2
YKT6	0	0	0	1	0	0	1	2
CCND1	0	0	0	1	0	1	0	2
LIFR	0	0	0	1	1	0	0	2
AMOTL2	0	0	0	1	0	0	1	2
BIRC6	0	0	0	1	1	0	0	2
RPA2	0	0	0	1	0	0	1	2
NAA50	0	0	0	1	0	0	1	2
SLC7A1	0	0	0	1	1	0	0	2
ANKRD52	0	0	0	1	0	0	1	2
NPEPPS	0	0	0	1	1	0	0	2
ZNF711	0	0	0	1	0	0	1	2
HNRNPH1	0	0	0	1	0	0	1	2
KCTD16	0	0	0	1	1	0	0	2
PPP1CC	0	0	0	1	0	0	1	2
CD2AP	0	0	0	1	1	0	0	2
H4C4	0	0	0	1	1	0	0	2
TNFRSF10B	0	0	0	0	1	0	1	2
UNG	0	0	0	0	1	1	0	2
APBB2	1	0	0	0	0	0	0	1
PRNP	1	0	0	0	0	0	0	1
ABI2	1	0	0	0	0	0	0	1
KIF3A	1	0	0	0	0	0	0	1
NOL8	1	0	0	0	0	0	0	1
EMC7	1	0	0	0	0	0	0	1
LNPK	1	0	0	0	0	0	0	1
MCFD2	1	0	0	0	0	0	0	1
RBMXL1	1	0	0	0	0	0	0	1
ARHGAP5	1	0	0	0	0	0	0	1
LUC7L3	1	0	0	0	0	0	0	1
YIPF4	1	0	0	0	0	0	0	1
OCRL	1	0	0	0	0	0	0	1
RAB3IP	1	0	0	0	0	0	0	1
MCCC2	1	0	0	0	0	0	0	1
RFK	1	0	0	0	0	0	0	1
CDK19	1	0	0	0	0	0	0	1
MMP16	1	0	0	0	0	0	0	1
RBM33	1	0	0	0	0	0	0	1
TUBB	1	0	0	0	0	0	0	1
KIF1A	0	1	0	0	0	0	0	1
ATR	0	1	0	0	0	0	0	1
FZD4	0	1	0	0	0	0	0	1
SLC25A12	0	1	0	0	0	0	0	1
YWHAQ	0	1	0	0	0	0	0	1
THRAP3	0	1	0	0	0	0	0	1
ANKRD12	0	1	0	0	0	0	0	1
CAPN15	0	1	0	0	0	0	0	1
RHOV	0	1	0	0	0	0	0	1
SUPT6H	0	1	0	0	0	0	0	1
NCL	0	1	0	0	0	0	0	1
MOAP1	0	1	0	0	0	0	0	1
PRR14L	0	1	0	0	0	0	0	1
SLC26A2	0	0	1	0	0	0	0	1
HINT1	0	0	1	0	0	0	0	1
KCNJ6	0	0	1	0	0	0	0	1
LNPEP	0	0	1	0	0	0	0	1
SMAD2	0	0	1	0	0	0	0	1
TGFBR1	0	0	1	0	0	0	0	1
WRN	0	0	1	0	0	0	0	1
FZD9	0	0	1	0	0	0	0	1
NCK2	0	0	1	0	0	0	0	1
VPS4B	0	0	1	0	0	0	0	1
CASC3	0	0	1	0	0	0	0	1
DCAF12	0	0	1	0	0	0	0	1
BEX3	0	0	1	0	0	0	0	1
CCDC59	0	0	1	0	0	0	0	1
BCL11B	0	0	1	0	0	0	0	1
PRRG4	0	0	1	0	0	0	0	1
ARMT1	0	0	1	0	0	0	0	1
ANP32E	0	0	1	0	0	0	0	1
IMP4	0	0	1	0	0	0	0	1
ARHGAP12	0	0	1	0	0	0	0	1
MIER3	0	0	1	0	0	0	0	1
FBXL3	0	0	1	0	0	0	0	1
QPCTL	0	0	1	0	0	0	0	1
PLEKHA5	0	0	1	0	0	0	0	1
WDR1	0	0	1	0	0	0	0	1
DLG1	0	0	1	0	0	0	0	1
TM9SF3	0	0	1	0	0	0	0	1
MLLT10	0	0	1	0	0	0	0	1
VDAC3	0	0	1	0	0	0	0	1
CIC	0	0	1	0	0	0	0	1
CIRBP	0	0	1	0	0	0	0	1
MAPK1	0	0	1	0	0	0	0	1
TM9SF4	0	0	1	0	0	0	0	1
MID1	0	0	1	0	0	0	0	1
SMARCA1	0	0	1	0	0	0	0	1
ELOB	0	0	1	0	0	0	0	1
TMEM245	0	0	1	0	0	0	0	1
KLF3	0	0	1	0	0	0	0	1
CAND1	0	0	1	0	0	0	0	1
HMGCR	0	0	1	0	0	0	0	1
DROSHA	0	0	1	0	0	0	0	1
NFE2L2	0	0	1	0	0	0	0	1
ZNF639	0	0	1	0	0	0	0	1
DDX39A	0	0	1	0	0	0	0	1
PHF10	0	0	1	0	0	0	0	1
SARAF	0	0	1	0	0	0	0	1
UBQLN1	0	0	1	0	0	0	0	1
HNRNPD	0	0	1	0	0	0	0	1
KIAA1109	0	0	1	0	0	0	0	1
TPM3	0	0	1	0	0	0	0	1
TMF1	0	0	1	0	0	0	0	1
PRSS23	0	0	1	0	0	0	0	1
FAM126B	0	0	1	0	0	0	0	1
AMOTL1	0	0	1	0	0	0	0	1
LENG8	0	0	1	0	0	0	0	1
IFFO2	0	0	1	0	0	0	0	1
SLC30A1	0	0	1	0	0	0	0	1
SOCS6	0	0	1	0	0	0	0	1
RGMB	0	0	1	0	0	0	0	1
DENND2C	0	0	1	0	0	0	0	1
SLC8A1	0	0	1	0	0	0	0	1
DENND11	0	0	1	0	0	0	0	1
CCNE1	0	0	0	1	0	0	0	1
ACVR2B	0	0	0	1	0	0	0	1
ADAM10	0	0	0	1	0	0	0	1
ATP5MC3	0	0	0	1	0	0	0	1
CAPZA2	0	0	0	1	0	0	0	1
CAV1	0	0	0	1	0	0	0	1
CCNT1	0	0	0	1	0	0	0	1
DECR1	0	0	0	1	0	0	0	1
EN2	0	0	0	1	0	0	0	1
GLRX	0	0	0	1	0	0	0	1
GNB1	0	0	0	1	0	0	0	1
INSIG1	0	0	0	1	0	0	0	1
KIF5B	0	0	0	1	0	0	0	1
LASP1	0	0	0	1	0	0	0	1
LBR	0	0	0	1	0	0	0	1
TM4SF1	0	0	0	1	0	0	0	1
MDM4	0	0	0	1	0	0	0	1
PDE4D	0	0	0	1	0	0	0	1
PIK3R1	0	0	0	1	0	0	0	1
PLAG1	0	0	0	1	0	0	0	1
RBBP6	0	0	0	1	0	0	0	1
RPS24	0	0	0	1	0	0	0	1
TGFBR3	0	0	0	1	0	0	0	1
TIMP3	0	0	0	1	0	0	0	1
TK1	0	0	0	1	0	0	0	1
TLE4	0	0	0	1	0	0	0	1
WEE1	0	0	0	1	0	0	0	1
SHOC2	0	0	0	1	0	0	0	1
FZD6	0	0	0	1	0	0	0	1
PEA15	0	0	0	1	0	0	0	1
RNMT	0	0	0	1	0	0	0	1
MTMR4	0	0	0	1	0	0	0	1
KLF4	0	0	0	1	0	0	0	1
EFTUD2	0	0	0	1	0	0	0	1
PPIG	0	0	0	1	0	0	0	1
KIF23	0	0	0	1	0	0	0	1
N4BP1	0	0	0	1	0	0	0	1
ARL4C	0	0	0	1	0	0	0	1
CITED2	0	0	0	1	0	0	0	1
CAMKK2	0	0	0	1	0	0	0	1
C11orf58	0	0	0	1	0	0	0	1
SYNRG	0	0	0	1	0	0	0	1
STK38	0	0	0	1	0	0	0	1
CPEB3	0	0	0	1	0	0	0	1
TTLL5	0	0	0	1	0	0	0	1
GGA3	0	0	0	1	0	0	0	1
TBC1D12	0	0	0	1	0	0	0	1
PNISR	0	0	0	1	0	0	0	1
SSU72	0	0	0	1	0	0	0	1
NIN	0	0	0	1	0	0	0	1
ANKFY1	0	0	0	1	0	0	0	1
CNNM2	0	0	0	1	0	0	0	1
CEP55	0	0	0	1	0	0	0	1
PPP6R3	0	0	0	1	0	0	0	1
DEPDC1B	0	0	0	1	0	0	0	1
GNG12	0	0	0	1	0	0	0	1
TULP4	0	0	0	1	0	0	0	1
SLC39A10	0	0	0	1	0	0	0	1
PAGR1	0	0	0	1	0	0	0	1
ITM2C	0	0	0	1	0	0	0	1
USP42	0	0	0	1	0	0	0	1
LCOR	0	0	0	1	0	0	0	1
WNT3A	0	0	0	1	0	0	0	1
NACC1	0	0	0	1	0	0	0	1
NUS1	0	0	0	1	0	0	0	1
SREK1	0	0	0	1	0	0	0	1
E2F7	0	0	0	1	0	0	0	1
CREBRF	0	0	0	1	0	0	0	1
AMOT	0	0	0	1	0	0	0	1
FAM122B	0	0	0	1	0	0	0	1
SPRED1	0	0	0	1	0	0	0	1
FLCN	0	0	0	1	0	0	0	1
RNF144B	0	0	0	1	0	0	0	1
FAM89A	0	0	0	1	0	0	0	1
GOLGA8B	0	0	0	1	0	0	0	1
SLC7A2	0	0	0	1	0	0	0	1
MAP3K9	0	0	0	1	0	0	0	1
FARP2	0	0	0	1	0	0	0	1
KIAA0100	0	0	0	1	0	0	0	1
PTBP1	0	0	0	1	0	0	0	1
CAPN1	0	0	0	1	0	0	0	1
SAMD4A	0	0	0	1	0	0	0	1
RB1CC1	0	0	0	1	0	0	0	1
AKAP11	0	0	0	1	0	0	0	1
PHF20	0	0	0	1	0	0	0	1
TOMM34	0	0	0	1	0	0	0	1
BCLAF1	0	0	0	1	0	0	0	1
RNF19A	0	0	0	1	0	0	0	1
SPDL1	0	0	0	1	0	0	0	1
STAU2	0	0	0	1	0	0	0	1
VPS13D	0	0	0	1	0	0	0	1
POLQ	0	0	0	1	0	0	0	1
KIF1B	0	0	0	1	0	0	0	1
PLEKHH1	0	0	0	1	0	0	0	1
SEC61A1	0	0	0	1	0	0	0	1
PPP1R12A	0	0	0	1	0	0	0	1
UNKL	0	0	0	1	0	0	0	1
TNK2	0	0	0	1	0	0	0	1
APPBP2	0	0	0	1	0	0	0	1
HIPK2	0	0	0	1	0	0	0	1
AP3D1	0	0	0	1	0	0	0	1
ANKRD44	0	0	0	1	0	0	0	1
SLK	0	0	0	1	0	0	0	1
ASPM	0	0	0	1	0	0	0	1
PRR11	0	0	0	1	0	0	0	1
LAPTM4A	0	0	0	1	0	0	0	1
MAPK6	0	0	0	1	0	0	0	1
NDST1	0	0	0	1	0	0	0	1
ATP2B1	0	0	0	1	0	0	0	1
TRIP13	0	0	0	1	0	0	0	1
AFF4	0	0	0	1	0	0	0	1
RHOBTB1	0	0	0	1	0	0	0	1
FERMT2	0	0	0	1	0	0	0	1
HACD3	0	0	0	1	0	0	0	1
NUP37	0	0	0	1	0	0	0	1
FOSL2	0	0	0	1	0	0	0	1
FRYL	0	0	0	1	0	0	0	1
UBE2K	0	0	0	1	0	0	0	1
FDFT1	0	0	0	1	0	0	0	1
HSP90AA1	0	0	0	1	0	0	0	1
NDC80	0	0	0	1	0	0	0	1
RSBN1	0	0	0	1	0	0	0	1
GSK3B	0	0	0	1	0	0	0	1
PDS5B	0	0	0	1	0	0	0	1
PREP	0	0	0	1	0	0	0	1
EPS15	0	0	0	1	0	0	0	1
EPDR1	0	0	0	1	0	0	0	1
ZFAND6	0	0	0	1	0	0	0	1
ADD1	0	0	0	1	0	0	0	1
AURKA	0	0	0	1	0	0	0	1
PTPN4	0	0	0	1	0	0	0	1
DDX18	0	0	0	1	0	0	0	1
BIRC5	0	0	0	1	0	0	0	1
STRN4	0	0	0	1	0	0	0	1
SPG21	0	0	0	1	0	0	0	1
AARS1	0	0	0	1	0	0	0	1
ORC6	0	0	0	1	0	0	0	1
ZFHX4	0	0	0	1	0	0	0	1
RNF31	0	0	0	1	0	0	0	1
HECTD1	0	0	0	1	0	0	0	1
PHGDH	0	0	0	1	0	0	0	1
DPYSL2	0	0	0	1	0	0	0	1
CBX5	0	0	0	1	0	0	0	1
FKBP5	0	0	0	1	0	0	0	1
HSP90AB1	0	0	0	1	0	0	0	1
HNRNPH3	0	0	0	1	0	0	0	1
HMOX1	0	0	0	1	0	0	0	1
MIEF1	0	0	0	1	0	0	0	1
ST13	0	0	0	1	0	0	0	1
RANGAP1	0	0	0	1	0	0	0	1
CEP128	0	0	0	1	0	0	0	1
EIF5	0	0	0	1	0	0	0	1
RPS6KA5	0	0	0	1	0	0	0	1
PABPN1	0	0	0	1	0	0	0	1
MMP9	0	0	0	1	0	0	0	1
GINS1	0	0	0	1	0	0	0	1
FAM83D	0	0	0	1	0	0	0	1
SUV39H1	0	0	0	1	0	0	0	1
CENPI	0	0	0	1	0	0	0	1
FNDC3A	0	0	0	1	0	0	0	1
KLF5	0	0	0	1	0	0	0	1
NFAT5	0	0	0	1	0	0	0	1
GSPT1	0	0	0	1	0	0	0	1
TRPS1	0	0	0	1	0	0	0	1
UBR5	0	0	0	1	0	0	0	1
EEF1D	0	0	0	1	0	0	0	1
TUSC3	0	0	0	1	0	0	0	1
ILVBL	0	0	0	1	0	0	0	1
GPI	0	0	0	1	0	0	0	1
AKT2	0	0	0	1	0	0	0	1
TGFB1	0	0	0	1	0	0	0	1
TNPO2	0	0	0	1	0	0	0	1
ELL	0	0	0	1	0	0	0	1
MTPN	0	0	0	1	0	0	0	1
H2AZ2	0	0	0	1	0	0	0	1
HOXA13	0	0	0	1	0	0	0	1
SERPINE1	0	0	0	1	0	0	0	1
SPIN1	0	0	0	1	0	0	0	1
ABHD17B	0	0	0	1	0	0	0	1
MICU1	0	0	0	1	0	0	0	1
SH3PXD2A	0	0	0	1	0	0	0	1
DNAJC12	0	0	0	1	0	0	0	1
PSMD3	0	0	0	1	0	0	0	1
KPNB1	0	0	0	1	0	0	0	1
SMURF2	0	0	0	1	0	0	0	1
PRKAR1A	0	0	0	1	0	0	0	1
MMD	0	0	0	1	0	0	0	1
WSB1	0	0	0	1	0	0	0	1
TMEM97	0	0	0	1	0	0	0	1
PHF12	0	0	0	1	0	0	0	1
UBE2D3	0	0	0	1	0	0	0	1
CLCN3	0	0	0	1	0	0	0	1
GALNT7	0	0	0	1	0	0	0	1
NEIL3	0	0	0	1	0	0	0	1
NSD2	0	0	0	1	0	0	0	1
SH3D19	0	0	0	1	0	0	0	1
CCDC34	0	0	0	1	0	0	0	1
UBE4A	0	0	0	1	0	0	0	1
KCTD10	0	0	0	1	0	0	0	1
ALDH2	0	0	0	1	0	0	0	1
CHD4	0	0	0	1	0	0	0	1
MAPK14	0	0	0	1	0	0	0	1
KCTD20	0	0	0	1	0	0	0	1
MDN1	0	0	0	1	0	0	0	1
TMEM30A	0	0	0	1	0	0	0	1
TTK	0	0	0	1	0	0	0	1
CNOT6	0	0	0	1	0	0	0	1
RARS1	0	0	0	1	0	0	0	1
SMAD5	0	0	0	1	0	0	0	1
CSNK1A1	0	0	0	1	0	0	0	1
ATP6V0E1	0	0	0	1	0	0	0	1
CPEB4	0	0	0	1	0	0	0	1
ARMC8	0	0	0	1	0	0	0	1
PDCD10	0	0	0	1	0	0	0	1
BBX	0	0	0	1	0	0	0	1
EIF4G1	0	0	0	1	0	0	0	1
GTF3C2	0	0	0	1	0	0	0	1
SPTBN1	0	0	0	1	0	0	0	1
GALNT3	0	0	0	1	0	0	0	1
IGFBP2	0	0	0	1	0	0	0	1
ODC1	0	0	0	1	0	0	0	1
GORASP2	0	0	0	1	0	0	0	1
PRKD3	0	0	0	1	0	0	0	1
SLC1A4	0	0	0	1	0	0	0	1
SCAMP3	0	0	0	1	0	0	0	1
SFPQ	0	0	0	1	0	0	0	1
MFN2	0	0	0	1	0	0	0	1
RGS4	0	0	0	1	0	0	0	1
NEK2	0	0	0	1	0	0	0	1
CENPF	0	0	0	1	0	0	0	1
CTSD	0	0	0	1	0	0	0	1
KMT2A	0	0	0	1	0	0	0	1
KIF14	0	0	0	1	0	0	0	1
RPN2	0	0	0	1	0	0	0	1
OLFM3	0	0	0	1	0	0	0	1
INVS	0	0	0	1	0	0	0	1
ONECUT2	0	0	0	1	0	0	0	1
YLPM1	0	0	0	1	0	0	0	1
GPAM	0	0	0	1	0	0	0	1
MASTL	0	0	0	1	0	0	0	1
EGR1	0	0	0	1	0	0	0	1
SPOP	0	0	0	1	0	0	0	1
KIF18A	0	0	0	1	0	0	0	1
PILRB	0	0	0	1	0	0	0	1
NAA60	0	0	0	1	0	0	0	1
FAM126A	0	0	0	1	0	0	0	1
NLN	0	0	0	1	0	0	0	1
CENPK	0	0	0	1	0	0	0	1
TUBA1B	0	0	0	1	0	0	0	1
HJURP	0	0	0	1	0	0	0	1
BAZ2B	0	0	0	1	0	0	0	1
CKS2	0	0	0	1	0	0	0	1
ACSL3	0	0	0	1	0	0	0	1
MOCS3	0	0	0	1	0	0	0	1
GOT2	0	0	0	1	0	0	0	1
RAP2A	0	0	0	1	0	0	0	1
POLR1B	0	0	0	1	0	0	0	1
SNRPB	0	0	0	1	0	0	0	1
EIF2S2	0	0	0	1	0	0	0	1
KDM5C	0	0	0	1	0	0	0	1
DNAJC8	0	0	0	1	0	0	0	1
DLGAP5	0	0	0	1	0	0	0	1
UBR4	0	0	0	1	0	0	0	1
SMARCA4	0	0	0	1	0	0	0	1
PNKD	0	0	0	1	0	0	0	1
ECHS1	0	0	0	1	0	0	0	1
KNSTRN	0	0	0	1	0	0	0	1
PARP2	0	0	0	1	0	0	0	1
SGO1	0	0	0	1	0	0	0	1
PRKCSH	0	0	0	1	0	0	0	1
MAP1S	0	0	0	1	0	0	0	1
ATXN10	0	0	0	1	0	0	0	1
SESN2	0	0	0	1	0	0	0	1
SLC6A8	0	0	0	1	0	0	0	1
TRAF3	0	0	0	1	0	0	0	1
TRAF7	0	0	0	1	0	0	0	1
TOP2A	0	0	0	1	0	0	0	1
PIK3C2B	0	0	0	1	0	0	0	1
DCLK1	0	0	0	1	0	0	0	1
IRS4	0	0	0	1	0	0	0	1
ERG28	0	0	0	1	0	0	0	1
LOXL2	0	0	0	1	0	0	0	1
SORT1	0	0	0	1	0	0	0	1
PTGFRN	0	0	0	1	0	0	0	1
NOTCH2	0	0	0	1	0	0	0	1
IL6ST	0	0	0	1	0	0	0	1
EMP1	0	0	0	1	0	0	0	1
RTL8C	0	0	0	1	0	0	0	1
DSC3	0	0	0	1	0	0	0	1
ARHGAP32	0	0	0	1	0	0	0	1
CPM	0	0	0	1	0	0	0	1
GCC2	0	0	0	1	0	0	0	1
KDELR2	0	0	0	1	0	0	0	1
BRIP1	0	0	0	1	0	0	0	1
KAT7	0	0	0	1	0	0	0	1
STAM	0	0	0	1	0	0	0	1
RNF38	0	0	0	1	0	0	0	1
SORL1	0	0	0	1	0	0	0	1
SEMA6D	0	0	0	1	0	0	0	1
LRPPRC	0	0	0	1	0	0	0	1
MYOF	0	0	0	1	0	0	0	1
KIF11	0	0	0	1	0	0	0	1
DUSP5	0	0	0	1	0	0	0	1
SEMA7A	0	0	0	1	0	0	0	1
HERC3	0	0	0	1	0	0	0	1
PCDH10	0	0	0	1	0	0	0	1
CENPE	0	0	0	1	0	0	0	1
KIF21A	0	0	0	1	0	0	0	1
LGR5	0	0	0	1	0	0	0	1
TMTC3	0	0	0	1	0	0	0	1
GLTP	0	0	0	1	0	0	0	1
NUP58	0	0	0	1	0	0	0	1
BRCA2	0	0	0	1	0	0	0	1
NOVA1	0	0	0	1	0	0	0	1
WDR89	0	0	0	1	0	0	0	1
TLNRD1	0	0	0	1	0	0	0	1
TOB1	0	0	0	1	0	0	0	1
GALNT1	0	0	0	1	0	0	0	1
ARHGDIA	0	0	0	1	0	0	0	1
KIF2C	0	0	0	1	0	0	0	1
CELSR2	0	0	0	1	0	0	0	1
ENSA	0	0	0	1	0	0	0	1
GOLPH3L	0	0	0	1	0	0	0	1
DTL	0	0	0	1	0	0	0	1
HNRNPLL	0	0	0	1	0	0	0	1
SLC20A1	0	0	0	1	0	0	0	1
CTDSP1	0	0	0	1	0	0	0	1
MYO10	0	0	0	1	0	0	0	1
PPIP5K2	0	0	0	1	0	0	0	1
YIPF5	0	0	0	1	0	0	0	1
ABT1	0	0	0	1	0	0	0	1
CREB5	0	0	0	1	0	0	0	1
CDCA5	0	0	0	1	0	0	0	1
IGFBP3	0	0	0	1	0	0	0	1
ZNF92	0	0	0	1	0	0	0	1
NCAPG2	0	0	0	1	0	0	0	1
TACC1	0	0	0	1	0	0	0	1
CEP78	0	0	0	1	0	0	0	1
MFSD14B	0	0	0	1	0	0	0	1
NCAM1	0	0	0	1	0	0	0	1
PPP4C	0	0	0	1	0	0	0	1
ARID5B	0	0	0	1	0	0	0	1
TMEM218	0	0	0	1	0	0	0	1
ITPR1	0	0	0	1	0	0	0	1
THRB	0	0	0	1	0	0	0	1
EXT2	0	0	0	1	0	0	0	1
ATP5F1A	0	0	0	1	0	0	0	1
SPC25	0	0	0	1	0	0	0	1
PDE3B	0	0	0	1	0	0	0	1
GUCY1A2	0	0	0	1	0	0	0	1
CCDC50	0	0	0	1	0	0	0	1
ZFP36L2	0	0	0	1	0	0	0	1
MBNL1	0	0	0	1	0	0	0	1
RAB3C	0	0	0	1	0	0	0	1
FAM49B	0	0	0	1	0	0	0	1
TRIP12	0	0	0	1	0	0	0	1
DDAH1	0	0	0	1	0	0	0	1
OTULIN	0	0	0	1	0	0	0	1
ATP6V1C1	0	0	0	1	0	0	0	1
CNOT8	0	0	0	1	0	0	0	1
GNAQ	0	0	0	1	0	0	0	1
SFXN2	0	0	0	1	0	0	0	1
FBXO43	0	0	0	1	0	0	0	1
SMG1	0	0	0	1	0	0	0	1
TSC22D3	0	0	0	1	0	0	0	1
PALM2AKAP2	0	0	0	1	0	0	0	1
CDC25C	0	0	0	1	0	0	0	1
TAGLN2	0	0	0	1	0	0	0	1
RCAN1	0	0	0	1	0	0	0	1
RUNX1	0	0	0	1	0	0	0	1
ALDH4A1	0	0	0	1	0	0	0	1
CCDC117	0	0	0	1	0	0	0	1
NR2F6	0	0	0	1	0	0	0	1
ADAR	0	0	0	1	0	0	0	1
LARP4	0	0	0	1	0	0	0	1
CCNF	0	0	0	1	0	0	0	1
LRP5	0	0	0	1	0	0	0	1
ZYG11B	0	0	0	1	0	0	0	1
PLPP3	0	0	0	1	0	0	0	1
SGPP2	0	0	0	1	0	0	0	1
TGFBR2	0	0	0	1	0	0	0	1
GMPS	0	0	0	1	0	0	0	1
RPP14	0	0	0	1	0	0	0	1
TOPBP1	0	0	0	1	0	0	0	1
SNRK	0	0	0	1	0	0	0	1
KIF15	0	0	0	1	0	0	0	1
ZNF148	0	0	0	1	0	0	0	1
EDIL3	0	0	0	1	0	0	0	1
ELOVL7	0	0	0	1	0	0	0	1
TENT2	0	0	0	1	0	0	0	1
SEPTIN8	0	0	0	1	0	0	0	1
DACT2	0	0	0	1	0	0	0	1
KIAA0895	0	0	0	1	0	0	0	1
PTTG1	0	0	0	1	0	0	0	1
UBAP1	0	0	0	1	0	0	0	1
NFIL3	0	0	0	1	0	0	0	1
SUGT1	0	0	0	1	0	0	0	1
SKA3	0	0	0	1	0	0	0	1
DDIAS	0	0	0	1	0	0	0	1
GHITM	0	0	0	1	0	0	0	1
PLK1	0	0	0	1	0	0	0	1
YWHAB	0	0	0	1	0	0	0	1
MARS1	0	0	0	1	0	0	0	1
FAM102A	0	0	0	1	0	0	0	1
MIDN	0	0	0	1	0	0	0	1
CDT1	0	0	0	1	0	0	0	1
TUBA1C	0	0	0	1	0	0	0	1
ZNF146	0	0	0	1	0	0	0	1
TSR1	0	0	0	1	0	0	0	1
CTNNB1	0	0	0	1	0	0	0	1
FADD	0	0	0	1	0	0	0	1
H1-4	0	0	0	1	0	0	0	1
FEN1	0	0	0	1	0	0	0	1
LRATD2	0	0	0	1	0	0	0	1
NSG1	0	0	0	1	0	0	0	1
FASN	0	0	0	1	0	0	0	1
DUS1L	0	0	0	1	0	0	0	1
CHD3	0	0	0	1	0	0	0	1
TRAPPC1	0	0	0	1	0	0	0	1
ATF7IP	0	0	0	1	0	0	0	1
RRM2	0	0	0	1	0	0	0	1
ORMDL3	0	0	0	1	0	0	0	1
C5orf34	0	0	0	1	0	0	0	1
EFEMP2	0	0	0	1	0	0	0	1
CFL1	0	0	0	1	0	0	0	1
CKS1B	0	0	0	1	0	0	0	1
PEAK1	0	0	0	1	0	0	0	1
TOMM20	0	0	0	1	0	0	0	1
PRPF8	0	0	0	1	0	0	0	1
ADCY6	0	0	0	1	0	0	0	1
C11orf45	0	0	0	1	0	0	0	1
MSL2	0	0	0	1	0	0	0	1
NR1D2	0	0	0	1	0	0	0	1
MARCKSL1	0	0	0	1	0	0	0	1
TP53I11	0	0	0	1	0	0	0	1
EIF3F	0	0	0	1	0	0	0	1
ARL10	0	0	0	1	0	0	0	1
MCTP1	0	0	0	1	0	0	0	1
UCP2	0	0	0	1	0	0	0	1
USF3	0	0	0	1	0	0	0	1
RNF152	0	0	0	1	0	0	0	1
METRNL	0	0	0	1	0	0	0	1
SOX11	0	0	0	1	0	0	0	1
FBXO46	0	0	0	1	0	0	0	1
ST8SIA3	0	0	0	1	0	0	0	1
ACAD9	0	0	0	1	0	0	0	1
CD151	0	0	0	1	0	0	0	1
NECTIN3	0	0	0	1	0	0	0	1
HNRNPA0	0	0	0	1	0	0	0	1
PLEC	0	0	0	1	0	0	0	1
WDR6	0	0	0	1	0	0	0	1
GEN1	0	0	0	1	0	0	0	1
COX14	0	0	0	1	0	0	0	1
SUZ12	0	0	0	1	0	0	0	1
RMI1	0	0	0	1	0	0	0	1
FBXO34	0	0	0	1	0	0	0	1
KLHL28	0	0	0	1	0	0	0	1
SERTAD2	0	0	0	1	0	0	0	1
MED14	0	0	0	1	0	0	0	1
H2BC4	0	0	0	1	0	0	0	1
SCRIB	0	0	0	1	0	0	0	1
NQO1	0	0	0	1	0	0	0	1
NPM1	0	0	0	1	0	0	0	1
ZBTB20	0	0	0	1	0	0	0	1
TNRC18	0	0	0	1	0	0	0	1
LDOC1	0	0	0	1	0	0	0	1
ZNF530	0	0	0	1	0	0	0	1
MACC1	0	0	0	1	0	0	0	1
IQGAP3	0	0	0	1	0	0	0	1
CLDN5	0	0	0	1	0	0	0	1
H1-5	0	0	0	1	0	0	0	1
KNTC1	0	0	0	1	0	0	0	1
FAM110C	0	0	0	1	0	0	0	1
C6orf120	0	0	0	1	0	0	0	1
METTL7A	0	0	0	1	0	0	0	1
ZFP36L1	0	0	0	1	0	0	0	1
MYBL1	0	0	0	1	0	0	0	1
ZNF267	0	0	0	1	0	0	0	1
MRTFB	0	0	0	1	0	0	0	1
RXRA	0	0	0	1	0	0	0	1
PCLO	0	0	0	1	0	0	0	1
ERCC6L	0	0	0	1	0	0	0	1
FANCA	0	0	0	1	0	0	0	1
H1-2	0	0	0	1	0	0	0	1
DNER	0	0	0	1	0	0	0	1
TUBB4B	0	0	0	1	0	0	0	1
PTAR1	0	0	0	1	0	0	0	1
MSL1	0	0	0	1	0	0	0	1
LITAF	0	0	0	1	0	0	0	1
FAT4	0	0	0	1	0	0	0	1
FAM217B	0	0	0	1	0	0	0	1
TRRAP	0	0	0	1	0	0	0	1
PRPF40A	0	0	0	1	0	0	0	1
TCF4	0	0	0	1	0	0	0	1
ZNF512B	0	0	0	1	0	0	0	1
ARHGEF12	0	0	0	1	0	0	0	1
NOP9	0	0	0	1	0	0	0	1
MAFG	0	0	0	1	0	0	0	1
IGF2R	0	0	0	1	0	0	0	1
DDI2	0	0	0	1	0	0	0	1
HTT	0	0	0	1	0	0	0	1
SIPA1L1	0	0	0	1	0	0	0	1
SPTAN1	0	0	0	1	0	0	0	1
PIM3	0	0	0	1	0	0	0	1
GPN1	0	0	0	1	0	0	0	1
ZNF627	0	0	0	1	0	0	0	1
CTNND1	0	0	0	1	0	0	0	1
KLHL9	0	0	0	1	0	0	0	1
PPP1R14C	0	0	0	1	0	0	0	1
CTR9	0	0	0	1	0	0	0	1
H2AC18	0	0	0	1	0	0	0	1
ITPRIPL2	0	0	0	1	0	0	0	1
ZNF580	0	0	0	1	0	0	0	1
COG8	0	0	0	1	0	0	0	1
PPP1CB	0	0	0	1	0	0	0	1
GTF2H4	0	0	0	1	0	0	0	1
IFI30	0	0	0	1	0	0	0	1
FANCG	0	0	0	1	0	0	0	1
MRPL20-AS1	0	0	0	1	0	0	0	1
DHFR	0	0	0	1	0	0	0	1
RNF103	0	0	0	1	0	0	0	1
GET4	0	0	0	1	0	0	0	1
PEG10	0	0	0	1	0	0	0	1
ECSCR	0	0	0	1	0	0	0	1
HOXB7	0	0	0	1	0	0	0	1
AL035425.3	0	0	0	1	0	0	0	1
MRPL12	0	0	0	1	0	0	0	1
DYNLL2	0	0	0	1	0	0	0	1
DCP1A	0	0	0	1	0	0	0	1
GRIN2B	0	0	0	1	0	0	0	1
CYFIP1	0	0	0	1	0	0	0	1
H2BC17	0	0	0	1	0	0	0	1
H2BC9	0	0	0	1	0	0	0	1
PIP4K2B	0	0	0	1	0	0	0	1
MARCKS	0	0	0	1	0	0	0	1
H3C7	0	0	0	1	0	0	0	1
H2AC4	0	0	0	1	0	0	0	1
NF2	0	0	0	0	1	0	0	1
RAVER2	0	0	0	0	1	0	0	1
LIN28	0	0	0	0	1	0	0	1
ITGB3	0	0	0	0	1	0	0	1
Ã âÃ¢ËÂ«B-Ras2	0	0	0	0	1	0	0	1
BMPR1B	0	0	0	0	1	0	0	1
DHX9	0	0	0	0	1	0	0	1
E2F2	0	0	0	0	1	0	0	1
EGFR	0	0	0	0	1	0	0	1
LTA4H	0	0	0	0	1	0	0	1
NPTX1	0	0	0	0	1	0	0	1
POU3F2	0	0	0	0	1	0	0	1
RPL35A	0	0	0	0	1	0	0	1
RPS3A	0	0	0	0	1	0	0	1
TNFAIP3	0	0	0	0	1	0	0	1
VDR	0	0	0	0	1	0	0	1
GTF3C5	0	0	0	0	1	0	0	1
UBE3C	0	0	0	0	1	0	0	1
COPZ1	0	0	0	0	1	0	0	1
CARHSP1	0	0	0	0	1	0	0	1
NIPBL	0	0	0	0	1	0	0	1
NKIRAS2	0	0	0	0	1	0	0	1
BTBD1	0	0	0	0	1	0	0	1
MEPCE	0	0	0	0	1	0	0	1
ARRDC3	0	0	0	0	1	0	0	1
DYNC2H1	0	0	0	0	1	0	0	1
LIN28A	0	0	0	0	1	0	0	1
SYVN1	0	0	0	0	1	0	0	1
NFATC2IP	0	0	0	0	1	0	0	1
UNK	0	0	0	0	1	0	0	1
DHX57	0	0	0	0	1	0	0	1
SLC35A4	0	0	0	0	1	0	0	1
H2BC18	0	0	0	0	1	0	0	1
EXTL3	0	0	0	0	1	0	0	1
ZMYND11	0	0	0	0	1	0	0	1
SLC39A9	0	0	0	0	1	0	0	1
SZRD1	0	0	0	0	1	0	0	1
MTHFD2	0	0	0	0	1	0	0	1
PPP2R5C	0	0	0	0	1	0	0	1
B4GALT1	0	0	0	0	1	0	0	1
TPX2	0	0	0	0	1	0	0	1
PEBP1	0	0	0	0	1	0	0	1
FUS	0	0	0	0	1	0	0	1
NRP1	0	0	0	0	1	0	0	1
BCL2L13	0	0	0	0	1	0	0	1
AXIN1	0	0	0	0	1	0	0	1
PTOV1	0	0	0	0	1	0	0	1
LFNG	0	0	0	0	1	0	0	1
EHD1	0	0	0	0	1	0	0	1
CD81	0	0	0	0	1	0	0	1
PPM1H	0	0	0	0	1	0	0	1
PSMD14	0	0	0	0	1	0	0	1
COX7A2L	0	0	0	0	1	0	0	1
TRAK2	0	0	0	0	1	0	0	1
SRSF11	0	0	0	0	1	0	0	1
PROSER1	0	0	0	0	1	0	0	1
RREB1	0	0	0	0	1	0	0	1
ID1	0	0	0	0	1	0	0	1
CHAC1	0	0	0	0	1	0	0	1
AFDN	0	0	0	0	1	0	0	1
ADRM1	0	0	0	0	1	0	0	1
ZSWIM4	0	0	0	0	1	0	0	1
PHC2	0	0	0	0	1	0	0	1
NUMA1	0	0	0	0	1	0	0	1
TACC2	0	0	0	0	1	0	0	1
INTS14	0	0	0	0	1	0	0	1
SEPTIN11	0	0	0	0	1	0	0	1
CDH11	0	0	0	0	1	0	0	1
MBTPS1	0	0	0	0	1	0	0	1
CLTC	0	0	0	0	1	0	0	1
CARM1	0	0	0	0	1	0	0	1
SDE2	0	0	0	0	1	0	0	1
UGCG	0	0	0	0	1	0	0	1
GPR180	0	0	0	0	1	0	0	1
RPL8	0	0	0	0	1	0	0	1
ANPEP	0	0	0	0	1	0	0	1
PCDH7	0	0	0	0	1	0	0	1
LONRF2	0	0	0	0	1	0	0	1
APLN	0	0	0	0	1	0	0	1
ZNF562	0	0	0	0	1	0	0	1
GNB2	0	0	0	0	1	0	0	1
KDM2A	0	0	0	0	1	0	0	1
RNF213	0	0	0	0	1	0	0	1
AKIRIN1	0	0	0	0	1	0	0	1
SPHK1	0	0	0	0	1	0	0	1
ZNF543	0	0	0	0	1	0	0	1
CDH5	0	0	0	0	1	0	0	1
H2AC6	0	0	0	0	1	0	0	1
TCEAL8	0	0	0	0	1	0	0	1
COL18A1	0	0	0	0	1	0	0	1
POMK	0	0	0	0	1	0	0	1
KIF18B	0	0	0	0	1	0	0	1
TIMM23	0	0	0	0	1	0	0	1
PIGW	0	0	0	0	1	0	0	1
ZNF85	0	0	0	0	0	1	0	1
AP3M2	0	0	0	0	0	1	0	1
POLL	0	0	0	0	0	1	0	1
KCTD15	0	0	0	0	0	1	0	1
APOLD1	0	0	0	0	0	1	0	1
IFNLR1	0	0	0	0	0	1	0	1
MACF1	0	0	0	0	0	1	0	1
GAB2	0	0	0	0	0	1	0	1
STIL	0	0	0	0	0	1	0	1
ALG10	0	0	0	0	0	1	0	1
FZD5	0	0	0	0	0	1	0	1
ZNF226	0	0	0	0	0	1	0	1
FOS	0	0	0	0	0	1	0	1
CASP3	0	0	0	0	0	0	1	1
EZH2	0	0	0	0	0	0	1	1
MFAP3	0	0	0	0	0	0	1	1
PLXNA1	0	0	0	0	0	0	1	1
SLC7A5	0	0	0	0	0	0	1	1
ZBTB39	0	0	0	0	0	0	1	1
ZNF507	0	0	0	0	0	0	1	1
LMBR1L	0	0	0	0	0	0	1	1
WDFY2	0	0	0	0	0	0	1	1
PHF13	0	0	0	0	0	0	1	1
GCSAM	0	0	0	0	0	0	1	1
SLC27A1	0	0	0	0	0	0	1	1
SKIDA1	0	0	0	0	0	0	1	1
HEATR5B	0	0	0	0	0	0	1	1
CD200	0	0	0	0	0	0	1	1
SUCO	0	0	0	0	0	0	1	1
HNRNPM	0	0	0	0	0	0	1	1
MKNK2	0	0	0	0	0	0	1	1
TNRC6B	0	0	0	0	0	0	1	1
KIAA0930	0	0	0	0	0	0	1	1
BRD1	0	0	0	0	0	0	1	1
DHX15	0	0	0	0	0	0	1	1
PRPF19	0	0	0	0	0	0	1	1
C5orf15	0	0	0	0	0	0	1	1
KLHL18	0	0	0	0	0	0	1	1
PLEKHB2	0	0	0	0	0	0	1	1
KDM5B	0	0	0	0	0	0	1	1
TGIF2	0	0	0	0	0	0	1	1
KLF9	0	0	0	0	0	0	1	1
COPA	0	0	0	0	0	0	1	1
PLA2G12A	0	0	0	0	0	0	1	1
CAPN7	0	0	0	0	0	0	1	1
RAN	0	0	0	0	0	0	1	1
H3-3B	0	0	0	0	0	0	1	1
ZRANB2	0	0	0	0	0	0	1	1
MDM2	0	0	0	0	0	0	1	1
DCAF7	0	0	0	0	0	0	1	1
LMX1B	0	0	0	0	0	0	1	1
FRMD6	0	0	0	0	0	0	1	1
ZCCHC14	0	0	0	0	0	0	1	1
DEF8	0	0	0	0	0	0	1	1
OSBPL1A	0	0	0	0	0	0	1	1
TMEM181	0	0	0	0	0	0	1	1
ZC3H12C	0	0	0	0	0	0	1	1
ASAP2	0	0	0	0	0	0	1	1
FAM168B	0	0	0	0	0	0	1	1
PDK1	0	0	0	0	0	0	1	1
PLOD2	0	0	0	0	0	0	1	1
MCU	0	0	0	0	0	0	1	1
EEF1A1	0	0	0	0	0	0	1	1
CNNM4	0	0	0	0	0	0	1	1
REL	0	0	0	0	0	0	1	1
ZNF367	0	0	0	0	0	0	1	1
ARL5B	0	0	0	0	0	0	1	1
MECP2	0	0	0	0	0	0	1	1
UGT8	0	0	0	0	0	0	1	1
TMEM167A	0	0	0	0	0	0	1	1
RPL15	0	0	0	0	0	0	1	1
UNC119B	0	0	0	0	0	0	1	1
LMNB2	0	0	0	0	0	0	1	1
C3orf38	0	0	0	0	0	0	1	1
SETD2	0	0	0	0	0	0	1	1
CEP97	0	0	0	0	0	0	1	1
DYNC1H1	0	0	0	0	0	0	1	1
RPE	0	0	0	0	0	0	1	1
ITSN2	0	0	0	0	0	0	1	1
GIGYF2	0	0	0	0	0	0	1	1
AKT1S1	0	0	0	0	0	0	1	1
JPT2	0	0	0	0	0	0	1	1
GAN	0	0	0	0	0	0	1	1
	0	0	0	0	0	0	0	0

## Sheet: S5 CH Testis
Target	hsa-miR-151a-3p & hsa-miR-128-3p	hsa-let-7c-5p & hsa-miR-3960	hsa-miR-664b-3p & hsa-miR-6529-5p	hsa-miR-192-5p & hsa-miR-16-5p	hsa-miR-1306-5p & hsa-miR-664b-3p	hsa-miR-320a-3p & hsa-miR-1260b	hsa-miR-101-3p & hsa-miR-16-5p	hsa-let-7a-5p & hsa-miR-3960	Sum
RHOA	1	0	0	0	0	0	1	0	2
ATP2B1	1	0	0	0	0	0	1	0	2
SDE2	1	0	0	0	0	0	1	0	2
DST	0	0	0	1	0	0	1	0	2
CHML	0	0	0	1	0	0	1	0	2
ITGA3	0	0	0	1	0	0	1	0	2
NFIB	0	0	0	1	0	0	1	0	2
PCDH7	0	0	0	1	0	0	1	0	2
PDE2A	0	0	0	1	0	0	1	0	2
CDC7	0	0	0	1	0	0	1	0	2
SPAG9	0	0	0	1	0	0	1	0	2
BCL2L11	0	0	0	1	0	0	1	0	2
CPSF6	0	0	0	1	0	0	1	0	2
ERLIN2	0	0	0	1	0	0	1	0	2
NUDT3	0	0	0	1	0	0	1	0	2
ARL2BP	0	0	0	1	0	0	1	0	2
TMEM30A	0	0	0	1	0	0	1	0	2
REXO5	0	0	0	1	0	0	1	0	2
PCGF5	0	0	0	1	0	0	1	0	2
KCTD12	0	0	0	1	0	0	1	0	2
TMTC3	0	0	0	1	0	0	1	0	2
FAM171B	0	0	0	1	0	0	1	0	2
TNRC6B	0	0	0	1	0	0	1	0	2
DHX15	0	0	0	1	0	0	1	0	2
TRIM2	0	0	0	1	0	0	1	0	2
KLF3	0	0	0	1	0	0	1	0	2
SOX4	0	0	0	1	0	0	1	0	2
AGFG1	0	0	0	1	0	0	1	0	2
ZNF711	1	0	0	0	0	0	0	0	1
PIM3	1	0	0	0	0	0	0	0	1
BIRC3	1	0	0	0	0	0	0	0	1
SERTAD4	1	0	0	0	0	0	0	0	1
SUCO	1	0	0	0	0	0	0	0	1
RNMT	1	0	0	0	0	0	0	0	1
GRB10	1	0	0	0	0	0	0	0	1
STAG1	1	0	0	0	0	0	0	0	1
KLHDC10	1	0	0	0	0	0	0	0	1
ETS1	1	0	0	0	0	0	0	0	1
FBLN5	1	0	0	0	0	0	0	0	1
HSPB8	1	0	0	0	0	0	0	0	1
TSC1	1	0	0	0	0	0	0	0	1
COPB2	1	0	0	0	0	0	0	0	1
BAZ1A	1	0	0	0	0	0	0	0	1
CDKN3	0	0	0	1	0	0	0	0	1
DDOST	0	0	0	1	0	0	0	0	1
COCH	0	0	0	1	0	0	0	0	1
EFNB2	0	0	0	1	0	0	0	0	1
CENPI	0	0	0	1	0	0	0	0	1
ID2	0	0	0	1	0	0	0	0	1
IL15	0	0	0	1	0	0	0	0	1
ITGB1	0	0	0	1	0	0	0	0	1
KIF5C	0	0	0	1	0	0	0	0	1
DNAJB9	0	0	0	1	0	0	0	0	1
NEK1	0	0	0	1	0	0	0	0	1
ORC1	0	0	0	1	0	0	0	0	1
TTK	0	0	0	1	0	0	0	0	1
USP1	0	0	0	1	0	0	0	0	1
BRD3	0	0	0	1	0	0	0	0	1
FZD1	0	0	0	1	0	0	0	0	1
PIP4K2B	0	0	0	1	0	0	0	0	1
CUL3	0	0	0	1	0	0	0	0	1
TTF2	0	0	0	1	0	0	0	0	1
CDC14A	0	0	0	1	0	0	0	0	1
ABCC3	0	0	0	1	0	0	0	0	1
SAP30	0	0	0	1	0	0	0	0	1
IQGAP1	0	0	0	1	0	0	0	0	1
ZNHIT3	0	0	0	1	0	0	0	0	1
KIF14	0	0	0	1	0	0	0	0	1
PHF19	0	0	0	1	0	0	0	0	1
TOR1B	0	0	0	1	0	0	0	0	1
PLCE1	0	0	0	1	0	0	0	0	1
NIN	0	0	0	1	0	0	0	0	1
EMC7	0	0	0	1	0	0	0	0	1
KIF15	0	0	0	1	0	0	0	0	1
CCDC47	0	0	0	1	0	0	0	0	1
ATP10D	0	0	0	1	0	0	0	0	1
MIB1	0	0	0	1	0	0	0	0	1
INIP	0	0	0	1	0	0	0	0	1
FNDC3B	0	0	0	1	0	0	0	0	1
NOL9	0	0	0	1	0	0	0	0	1
CLIP4	0	0	0	1	0	0	0	0	1
ERMP1	0	0	0	1	0	0	0	0	1
BBOF1	0	0	0	1	0	0	0	0	1
OSBPL8	0	0	0	1	0	0	0	0	1
NIPA1	0	0	0	1	0	0	0	0	1
AFAP1L1	0	0	0	1	0	0	0	0	1
CKAP2L	0	0	0	1	0	0	0	0	1
SKA1	0	0	0	1	0	0	0	0	1
FSCN1	0	0	0	1	0	0	0	0	1
DDX24	0	0	0	1	0	0	0	0	1
CLIP2	0	0	0	1	0	0	0	0	1
AUP1	0	0	0	1	0	0	0	0	1
CCT4	0	0	0	1	0	0	0	0	1
ICMT	0	0	0	1	0	0	0	0	1
UCHL3	0	0	0	1	0	0	0	0	1
IRS4	0	0	0	1	0	0	0	0	1
IL6	0	0	0	1	0	0	0	0	1
GIGYF1	0	0	0	1	0	0	0	0	1
SLC37A3	0	0	0	1	0	0	0	0	1
DLC1	0	0	0	1	0	0	0	0	1
TP53INP1	0	0	0	1	0	0	0	0	1
AXL	0	0	0	1	0	0	0	0	1
LTBP3	0	0	0	1	0	0	0	0	1
REEP4	0	0	0	1	0	0	0	0	1
MCFD2	0	0	0	1	0	0	0	0	1
CREB3L2	0	0	0	1	0	0	0	0	1
CBX6	0	0	0	1	0	0	0	0	1
S100A16	0	0	0	1	0	0	0	0	1
MLLT6	0	0	0	1	0	0	0	0	1
DUSP14	0	0	0	1	0	0	0	0	1
CXorf56	0	0	0	0	1	0	0	0	1
POLR3D	0	0	0	0	0	1	0	0	1
AMD1	0	0	0	0	0	0	1	0	1
BIRC5	0	0	0	0	0	0	1	0	1
CTNNB1	0	0	0	0	0	0	1	0	1
DNAJA1	0	0	0	0	0	0	1	0	1
LBR	0	0	0	0	0	0	1	0	1
CD46	0	0	0	0	0	0	1	0	1
MEIS1	0	0	0	0	0	0	1	0	1
MSH2	0	0	0	0	0	0	1	0	1
PRKAB1	0	0	0	0	0	0	1	0	1
MAP2K1	0	0	0	0	0	0	1	0	1
TAF13	0	0	0	0	0	0	1	0	1
ZEB1	0	0	0	0	0	0	1	0	1
VAPA	0	0	0	0	0	0	1	0	1
BZW1	0	0	0	0	0	0	1	0	1
RANBP9	0	0	0	0	0	0	1	0	1
FNDC3A	0	0	0	0	0	0	1	0	1
SACM1L	0	0	0	0	0	0	1	0	1
FBXW7	0	0	0	0	0	0	1	0	1
RTN4	0	0	0	0	0	0	1	0	1
SLC30A5	0	0	0	0	0	0	1	0	1
AMMECR1L	0	0	0	0	0	0	1	0	1
VPS50	0	0	0	0	0	0	1	0	1
DHX33	0	0	0	0	0	0	1	0	1
SEC62	0	0	0	0	0	0	1	0	1
SPRTN	0	0	0	0	0	0	1	0	1
TMEM159	0	0	0	0	0	0	1	0	1
TRIO	0	0	0	0	0	0	1	0	1
DSG2	0	0	0	0	0	0	1	0	1
NDC1	0	0	0	0	0	0	1	0	1
MON2	0	0	0	0	0	0	1	0	1
ZC3H15	0	0	0	0	0	0	1	0	1
PSME4	0	0	0	0	0	0	1	0	1
MAST4	0	0	0	0	0	0	1	0	1
SLC44A1	0	0	0	0	0	0	1	0	1
DGCR2	0	0	0	0	0	0	1	0	1
NDST1	0	0	0	0	0	0	1	0	1
NTN4	0	0	0	0	0	0	1	0	1
NUAK1	0	0	0	0	0	0	1	0	1
DDHD2	0	0	0	0	0	0	1	0	1
AGO1	0	0	0	0	0	0	1	0	1
BTAF1	0	0	0	0	0	0	1	0	1
MFNG	0	0	0	0	0	0	1	0	1
ZC3H7B	0	0	0	0	0	0	1	0	1
SPTLC2	0	0	0	0	0	0	1	0	1
SEC23A	0	0	0	0	0	0	1	0	1
PRELID3B	0	0	0	0	0	0	1	0	1
ACOT8	0	0	0	0	0	0	1	0	1
SQLE	0	0	0	0	0	0	1	0	1
ASAH1	0	0	0	0	0	0	1	0	1
SYDE1	0	0	0	0	0	0	1	0	1
HBP1	0	0	0	0	0	0	1	0	1
TSPAN13	0	0	0	0	0	0	1	0	1
SETX	0	0	0	0	0	0	1	0	1
DVL1	0	0	0	0	0	0	1	0	1
SMC3	0	0	0	0	0	0	1	0	1
TRIM37	0	0	0	0	0	0	1	0	1
WSB1	0	0	0	0	0	0	1	0	1
PDHX	0	0	0	0	0	0	1	0	1
ELK3	0	0	0	0	0	0	1	0	1
CDK2AP1	0	0	0	0	0	0	1	0	1
COL12A1	0	0	0	0	0	0	1	0	1
MAPK14	0	0	0	0	0	0	1	0	1
PPP2R5D	0	0	0	0	0	0	1	0	1
HMGCR	0	0	0	0	0	0	1	0	1
STAM2	0	0	0	0	0	0	1	0	1
EDEM3	0	0	0	0	0	0	1	0	1
OSCP1	0	0	0	0	0	0	1	0	1
ADGRL2	0	0	0	0	0	0	1	0	1
SSX2IP	0	0	0	0	0	0	1	0	1
KLF7	0	0	0	0	0	0	1	0	1
PPP6C	0	0	0	0	0	0	1	0	1
HELLS	0	0	0	0	0	0	1	0	1
CAAP1	0	0	0	0	0	0	1	0	1
AGO3	0	0	0	0	0	0	1	0	1
CDC42EP1	0	0	0	0	0	0	1	0	1
TEP1	0	0	0	0	0	0	1	0	1
PNISR	0	0	0	0	0	0	1	0	1
MPRIP	0	0	0	0	0	0	1	0	1
TIMM17A	0	0	0	0	0	0	1	0	1
USP15	0	0	0	0	0	0	1	0	1
CEP350	0	0	0	0	0	0	1	0	1
ITM2C	0	0	0	0	0	0	1	0	1
SRSF1	0	0	0	0	0	0	1	0	1
DCAF7	0	0	0	0	0	0	1	0	1
CNPY3	0	0	0	0	0	0	1	0	1
RAB30	0	0	0	0	0	0	1	0	1
THBS1	0	0	0	0	0	0	1	0	1
ADAM10	0	0	0	0	0	0	1	0	1
SELENOI	0	0	0	0	0	0	1	0	1
CPNE8	0	0	0	0	0	0	1	0	1
RAB15	0	0	0	0	0	0	1	0	1
RPRD1A	0	0	0	0	0	0	1	0	1
LMO4	0	0	0	0	0	0	1	0	1
ATP8B2	0	0	0	0	0	0	1	0	1
GALNT2	0	0	0	0	0	0	1	0	1
CTDSPL	0	0	0	0	0	0	1	0	1
EPHA5	0	0	0	0	0	0	1	0	1
RASA1	0	0	0	0	0	0	1	0	1
HAUS6	0	0	0	0	0	0	1	0	1
TAGLN	0	0	0	0	0	0	1	0	1
PDCD4	0	0	0	0	0	0	1	0	1
EIF4E	0	0	0	0	0	0	1	0	1
CEBPG	0	0	0	0	0	0	1	0	1
OTULIN	0	0	0	0	0	0	1	0	1
ENAH	0	0	0	0	0	0	1	0	1
VOPP1	0	0	0	0	0	0	1	0	1
NUP205	0	0	0	0	0	0	1	0	1
NPTN	0	0	0	0	0	0	1	0	1
SAMD8	0	0	0	0	0	0	1	0	1
BAG4	0	0	0	0	0	0	1	0	1
EIF4A2	0	0	0	0	0	0	1	0	1
PAQR6	0	0	0	0	0	0	1	0	1
IER2	0	0	0	0	0	0	1	0	1
GPR155	0	0	0	0	0	0	1	0	1
CLASP2	0	0	0	0	0	0	1	0	1
PRICKLE2	0	0	0	0	0	0	1	0	1
AGGF1	0	0	0	0	0	0	1	0	1
CACNB2	0	0	0	0	0	0	1	0	1
BAG5	0	0	0	0	0	0	1	0	1
TMEM100	0	0	0	0	0	0	1	0	1
MFAP4	0	0	0	0	0	0	1	0	1
PATL1	0	0	0	0	0	0	1	0	1
SDC2	0	0	0	0	0	0	1	0	1
LONRF2	0	0	0	0	0	0	1	0	1
EFEMP2	0	0	0	0	0	0	1	0	1
TNKS	0	0	0	0	0	0	1	0	1
LIG4	0	0	0	0	0	0	1	0	1
PNMA1	0	0	0	0	0	0	1	0	1
TBL1XR1	0	0	0	0	0	0	1	0	1
UBE2N	0	0	0	0	0	0	1	0	1
ZNRF2	0	0	0	0	0	0	1	0	1
GAS1	0	0	0	0	0	0	1	0	1
MIGA1	0	0	0	0	0	0	1	0	1
PCDH9	0	0	0	0	0	0	1	0	1
FAT4	0	0	0	0	0	0	1	0	1
PPTC7	0	0	0	0	0	0	1	0	1
SLC39A10	0	0	0	0	0	0	1	0	1
ENTPD4	0	0	0	0	0	0	1	0	1
PDGFA	0	0	0	0	0	0	1	0	1
PDE7A	0	0	0	0	0	0	1	0	1
REPIN1	0	0	0	0	0	0	1	0	1
SYNRG	0	0	0	0	0	0	1	0	1
PYGB	0	0	0	0	0	0	0	1	1

## Sheet: S6 CL Testis
Target	hsa-miR-1260b & hsa-miR-369-3p	hsa-let-7f-5p & hsa-miR-125b-5p	hsa-miR-128-3p & hsa-miR-216b-5p	hsa-miR-103a-3p & hsa-miR-128-3p	hsa-let-7a-5p & hsa-miR-125b-5p	hsa-miR-204-3p & hsa-miR-215-5p	hsa-miR-30d-5p & hsa-miR-1260b	Sum
AGO1	0	1	0	1	1	0	1	4
PKD1	0	1	0	1	1	0	0	3
CTNNA1	0	1	0	1	1	0	0	3
HBP1	0	1	0	1	1	0	0	3
PLEKHA8	0	1	0	0	1	0	1	3
ID2	0	1	0	1	1	0	0	3
PLAGL1	0	1	0	1	1	0	0	3
HELLS	0	1	0	1	1	0	0	3
PDS5A	0	1	0	1	1	0	0	3
AGO3	0	1	0	1	1	0	0	3
DUSP6	0	1	0	1	1	0	0	3
CRTAP	0	1	0	1	1	0	0	3
EHMT1	0	1	0	1	1	0	0	3
PCDH9	0	1	0	1	1	0	0	3
PKM	1	0	0	0	1	0	0	2
ATAD1	1	0	0	0	0	0	1	2
SELENOI	1	0	0	0	0	0	1	2
MPRIP	1	0	0	1	0	0	0	2
KCTD12	1	0	0	0	0	0	1	2
AMD1	0	1	0	0	1	0	0	2
MYH9	0	1	0	0	1	0	0	2
OPRL1	0	1	0	0	1	0	0	2
SMARCC1	0	1	0	0	1	0	0	2
THBS1	0	1	0	0	1	0	0	2
PLXND1	0	1	0	0	1	0	0	2
SEMA4C	0	1	0	0	1	0	0	2
YOD1	0	1	0	0	1	0	0	2
EDEM3	0	1	0	0	1	0	0	2
DHX33	0	1	0	0	1	0	0	2
XYLT2	0	1	0	0	1	0	0	2
KPNA6	0	1	0	0	1	0	0	2
DSG2	0	1	0	0	1	0	0	2
CUL1	0	1	0	0	1	0	0	2
NDC1	0	1	0	0	1	0	0	2
BCAT1	0	1	0	0	1	0	0	2
FNDC3B	0	1	0	0	1	0	0	2
ZMYND8	0	1	0	0	1	0	0	2
CDK16	0	1	0	0	1	0	0	2
TSPAN14	0	1	0	0	1	0	0	2
HTATIP2	0	1	0	0	1	0	0	2
WDR11	0	1	0	0	1	0	0	2
SOX4	0	1	0	0	1	0	0	2
THRA	0	1	0	0	1	0	0	2
SYNE1	0	1	0	0	1	0	0	2
EPHA7	0	1	0	0	1	0	0	2
TRIM65	0	1	0	0	1	0	0	2
IGSF3	0	1	0	0	1	0	0	2
GIGYF1	0	1	0	0	1	0	0	2
MFHAS1	0	1	0	0	1	0	0	2
DST	0	1	0	0	1	0	0	2
PTPRD	0	1	0	0	1	0	0	2
ADAMTS5	0	1	0	0	1	0	0	2
DLC1	0	1	0	0	1	0	0	2
TP53INP1	0	1	0	0	1	0	0	2
IGF2	0	1	0	0	1	0	0	2
KIF5C	0	1	0	0	1	0	0	2
TET2	0	1	0	0	1	0	0	2
EIF1AD	0	1	0	0	1	0	0	2
PDE4DIP	0	1	0	0	1	0	0	2
PRKAG1	0	1	0	0	1	0	0	2
NOP10	0	1	0	0	1	0	0	2
CREB3L2	0	1	0	0	1	0	0	2
ERBIN	0	0	1	1	0	0	0	2
RTN4	0	0	1	1	0	0	0	2
LPCAT1	0	0	1	1	0	0	0	2
SRSF1	0	0	0	1	0	0	1	2
FBXW7	0	0	0	1	0	0	1	2
ZNF711	0	0	0	1	0	0	1	2
EMC7	1	0	0	0	0	0	0	1
MCFD2	1	0	0	0	0	0	0	1
RFK	1	0	0	0	0	0	0	1
MMP16	1	0	0	0	0	0	0	1
LNPEP	0	0	1	0	0	0	0	1
CCDC59	0	0	1	0	0	0	0	1
PLEKHA5	0	0	1	0	0	0	0	1
MID1	0	0	1	0	0	0	0	1
KLF3	0	0	1	0	0	0	0	1
HMGCR	0	0	1	0	0	0	0	1
ADAM10	0	0	0	1	0	0	0	1
INSIG1	0	0	0	1	0	0	0	1
LASP1	0	0	0	1	0	0	0	1
LBR	0	0	0	1	0	0	0	1
RNMT	0	0	0	1	0	0	0	1
SYNRG	0	0	0	1	0	0	0	1
TTLL5	0	0	0	1	0	0	0	1
PNISR	0	0	0	1	0	0	0	1
NIN	0	0	0	1	0	0	0	1
CNNM2	0	0	0	1	0	0	0	1
PPP6R3	0	0	0	1	0	0	0	1
SLC39A10	0	0	0	1	0	0	0	1
ITM2C	0	0	0	1	0	0	0	1
SPRED1	0	0	0	1	0	0	0	1
CAPN1	0	0	0	1	0	0	0	1
RB1CC1	0	0	0	1	0	0	0	1
NDST1	0	0	0	1	0	0	0	1
ATP2B1	0	0	0	1	0	0	0	1
FDFT1	0	0	0	1	0	0	0	1
EPDR1	0	0	0	1	0	0	0	1
AURKA	0	0	0	1	0	0	0	1
BIRC5	0	0	0	1	0	0	0	1
SPG21	0	0	0	1	0	0	0	1
PHGDH	0	0	0	1	0	0	0	1
CENPI	0	0	0	1	0	0	0	1
FNDC3A	0	0	0	1	0	0	0	1
ILVBL	0	0	0	1	0	0	0	1
AKT2	0	0	0	1	0	0	0	1
SH3PXD2A	0	0	0	1	0	0	0	1
WSB1	0	0	0	1	0	0	0	1
TMEM97	0	0	0	1	0	0	0	1
MAPK14	0	0	0	1	0	0	0	1
TMEM30A	0	0	0	1	0	0	0	1
TTK	0	0	0	1	0	0	0	1
ARMC8	0	0	0	1	0	0	0	1
GTF3C2	0	0	0	1	0	0	0	1
GALNT3	0	0	0	1	0	0	0	1
GORASP2	0	0	0	1	0	0	0	1
PRKD3	0	0	0	1	0	0	0	1
RGS4	0	0	0	1	0	0	0	1
NEK2	0	0	0	1	0	0	0	1
KIF14	0	0	0	1	0	0	0	1
INVS	0	0	0	1	0	0	0	1
SPOP	0	0	0	1	0	0	0	1
BAZ2B	0	0	0	1	0	0	0	1
EIF2S2	0	0	0	1	0	0	0	1
KNSTRN	0	0	0	1	0	0	0	1
IRS4	0	0	0	1	0	0	0	1
SORT1	0	0	0	1	0	0	0	1
PTGFRN	0	0	0	1	0	0	0	1
SEMA6D	0	0	0	1	0	0	0	1
TMTC3	0	0	0	1	0	0	0	1
WDR89	0	0	0	1	0	0	0	1
PPIP5K2	0	0	0	1	0	0	0	1
EXT2	0	0	0	1	0	0	0	1
OTULIN	0	0	0	1	0	0	0	1
ATP6V1C1	0	0	0	1	0	0	0	1
FBXO43	0	0	0	1	0	0	0	1
GMPS	0	0	0	1	0	0	0	1
KIF15	0	0	0	1	0	0	0	1
KIAA0895	0	0	0	1	0	0	0	1
SKA3	0	0	0	1	0	0	0	1
GHITM	0	0	0	1	0	0	0	1
TSR1	0	0	0	1	0	0	0	1
CTNNB1	0	0	0	1	0	0	0	1
EFEMP2	0	0	0	1	0	0	0	1
ADCY6	0	0	0	1	0	0	0	1
MARCKSL1	0	0	0	1	0	0	0	1
WDR6	0	0	0	1	0	0	0	1
TUBB4B	0	0	0	1	0	0	0	1
PTAR1	0	0	0	1	0	0	0	1
FAT4	0	0	0	1	0	0	0	1
PRPF40A	0	0	0	1	0	0	0	1
TCF4	0	0	0	1	0	0	0	1
PIM3	0	0	0	1	0	0	0	1
FANCG	0	0	0	1	0	0	0	1
ECSCR	0	0	0	1	0	0	0	1
CYFIP1	0	0	0	1	0	0	0	1
PIP4K2B	0	0	0	1	0	0	0	1
RAVER2	0	0	0	0	1	0	0	1
LTA4H	0	0	0	0	1	0	0	1
RPL35A	0	0	0	0	1	0	0	1
BTBD1	0	0	0	0	1	0	0	1
LFNG	0	0	0	0	1	0	0	1
NUMA1	0	0	0	0	1	0	0	1
CDH11	0	0	0	0	1	0	0	1
SDE2	0	0	0	0	1	0	0	1
PCDH7	0	0	0	0	1	0	0	1
LONRF2	0	0	0	0	1	0	0	1
KDM2A	0	0	0	0	1	0	0	1
CDH5	0	0	0	0	1	0	0	1
PIGW	0	0	0	0	1	0	0	1
KCTD15	0	0	0	0	0	1	0	1
EZH2	0	0	0	0	0	0	1	1
PLXNA1	0	0	0	0	0	0	1	1
SUCO	0	0	0	0	0	0	1	1
MKNK2	0	0	0	0	0	0	1	1
TNRC6B	0	0	0	0	0	0	1	1
DHX15	0	0	0	0	0	0	1	1
COPA	0	0	0	0	0	0	1	1
DCAF7	0	0	0	0	0	0	1	1
DEF8	0	0	0	0	0	0	1	1
OSBPL1A	0	0	0	0	0	0	1	1
C3orf38	0	0	0	0	0	0	1	1
JPT2	0	0	0	0	0	0	1	1

## Sheet: S7 CH Embryo
Target	hsa-miR-151a-3p & hsa-miR-128-3p	hsa-let-7c-5p & hsa-miR-3960	hsa-miR-664b-3p & hsa-miR-6529-5p	hsa-miR-192-5p & hsa-miR-16-5p	hsa-miR-1306-5p & hsa-miR-664b-3p	hsa-miR-320a-3p & hsa-miR-1260b	hsa-miR-101-3p & hsa-miR-16-5p	hsa-let-7a-5p & hsa-miR-3960	Sum
TNPO1	1	0	0	1	0	0	1	0	3
MED13	1	0	0	1	0	0	1	0	3
SLC7A2	1	0	0	1	0	0	1	0	3
TM9SF3	1	0	0	1	0	0	1	0	3
PLAGL2	1	0	0	1	0	0	1	0	3
IL6ST	1	0	0	1	0	0	1	0	3
MSN	1	0	0	1	0	0	1	0	3
PURA	1	0	0	1	0	0	1	0	3
DYNLL2	1	0	0	1	0	0	1	0	3
PEG10	0	1	0	0	0	0	1	1	3
CCNE1	1	0	0	1	0	0	0	0	2
MEGF9	1	0	0	0	0	0	1	0	2
IREB2	1	0	0	0	0	0	1	0	2
MAP1B	1	0	0	0	0	0	1	0	2
MCL1	1	0	0	0	0	0	1	0	2
UHMK1	1	0	0	0	0	0	1	0	2
ANKRD52	1	0	0	0	0	0	1	0	2
SFT2D2	1	0	0	0	0	0	1	0	2
KIAA0100	1	0	0	1	0	0	0	0	2
REV3L	1	0	0	0	0	0	1	0	2
ZNF207	1	0	0	0	0	0	1	0	2
MATR3	1	0	0	0	0	0	1	0	2
NCKAP1	1	0	0	0	0	0	1	0	2
RHOA	1	0	0	0	0	0	1	0	2
ATP2B1	1	0	0	0	0	0	1	0	2
XPO1	1	0	0	1	0	0	0	0	2
CBX5	1	0	0	0	0	0	1	0	2
HSP90AB1	1	0	0	0	0	0	1	0	2
CDK6	1	0	0	0	0	0	1	0	2
MTPN	1	0	0	0	0	0	1	0	2
YKT6	1	0	0	0	0	0	1	0	2
CPEB3	1	0	0	0	0	0	1	0	2
EIF4G2	1	0	0	0	0	0	1	0	2
PDE4D	1	0	0	0	0	0	1	0	2
SLC35F5	1	0	0	0	0	0	1	0	2
IGFBP5	1	0	0	0	0	0	1	0	2
BIRC6	1	0	0	0	0	0	1	0	2
ARID1A	1	0	0	0	0	0	1	0	2
HNRNPA2B1	1	0	0	0	0	0	1	0	2
DIAPH1	1	0	0	0	0	0	1	0	2
PPIG	1	0	0	0	0	0	1	0	2
ABT1	1	0	0	0	0	0	1	0	2
MTDH	1	0	0	1	0	0	0	0	2
UGCG	1	0	0	0	0	0	1	0	2
BACH1	1	0	0	0	0	0	1	0	2
LARP4	1	0	0	0	0	0	1	0	2
ARL5B	1	0	0	1	0	0	0	0	2
NETO2	1	0	0	0	0	0	1	0	2
TRIB1	1	0	0	0	0	0	1	0	2
KLHL15	1	0	0	1	0	0	0	0	2
RGMB	1	0	0	0	0	0	1	0	2
RBM12B	1	0	0	0	1	0	0	0	2
BRWD1	1	0	0	1	0	0	0	0	2
ARID2	1	0	0	0	0	0	1	0	2
LCOR	1	0	0	0	0	0	1	0	2
DCP1A	1	0	0	1	0	0	0	0	2
VAV3	0	1	0	0	0	0	0	1	2
TFAP2A	0	1	0	0	0	0	0	1	2
ZBTB7B	0	1	0	0	0	0	0	1	2
HIC2	0	1	0	0	0	0	0	1	2
ACVR2B	0	0	0	1	0	0	1	0	2
XIAP	0	0	0	1	0	0	1	0	2
TRIM23	0	0	0	1	0	0	1	0	2
ATP1B1	0	0	0	1	0	0	1	0	2
DST	0	0	0	1	0	0	1	0	2
CFL2	0	0	0	1	0	0	1	0	2
CHML	0	0	0	1	0	0	1	0	2
CREBL2	0	0	0	1	0	0	1	0	2
CRK	0	0	0	1	0	0	1	0	2
DDX3X	0	0	0	1	0	0	1	0	2
DDX6	0	0	0	1	0	0	1	0	2
EGR1	0	0	0	1	0	0	1	0	2
FBN1	0	0	0	1	0	0	1	0	2
FGF2	0	0	0	1	0	0	1	0	2
FOS	0	0	0	1	0	0	1	0	2
ID1	0	0	0	1	0	0	1	0	2
IGF1R	0	0	0	1	0	0	1	0	2
IMPA1	0	0	0	1	0	0	1	0	2
ITGA3	0	0	0	1	0	0	1	0	2
KIF5B	0	0	0	1	0	0	1	0	2
LMNB1	0	0	0	1	0	0	1	0	2
MAD2L1	0	0	0	1	0	0	1	0	2
MKI67	0	0	0	1	0	0	1	0	2
PPP1R12A	0	0	0	1	0	0	1	0	2
NFIB	0	0	0	1	0	0	1	0	2
PAFAH1B1	0	0	0	1	0	0	1	0	2
SERPINE1	0	0	0	1	0	0	1	0	2
PCDH7	0	0	0	1	0	0	1	0	2
PIM1	0	0	0	1	0	0	1	0	2
POU2F1	0	0	0	1	0	0	1	0	2
PPM1A	0	0	0	1	0	0	1	0	2
PRIM1	0	0	0	1	0	0	1	0	2
RAB1A	0	0	0	1	0	0	1	0	2
RBL2	0	0	0	1	0	0	1	0	2
RRM1	0	0	0	1	0	0	1	0	2
SLC1A4	0	0	0	1	0	0	1	0	2
SMARCA2	0	0	0	1	0	0	1	0	2
SPARC	0	0	0	1	0	0	1	0	2
TBL1X	0	0	0	1	0	0	1	0	2
TOP1	0	0	0	1	0	0	1	0	2
HSP90B1	0	0	0	1	0	0	1	0	2
UBE2D1	0	0	0	1	0	0	1	0	2
UNG	0	0	0	1	0	0	1	0	2
CDC7	0	0	0	1	0	0	1	0	2
EEA1	0	0	0	1	0	0	1	0	2
AP1S2	0	0	0	1	0	0	1	0	2
SPAG9	0	0	0	1	0	0	1	0	2
USP14	0	0	0	1	0	0	1	0	2
NMI	0	0	0	1	0	0	1	0	2
USP34	0	0	0	1	0	0	1	0	2
BCL2L11	0	0	0	1	0	0	1	0	2
SH2B3	0	0	0	1	0	0	1	0	2
SMC4	0	0	0	1	0	0	1	0	2
ACTR2	0	0	0	1	0	0	1	0	2
ARL4C	0	0	0	1	0	0	1	0	2
MFSD10	0	0	0	1	0	0	1	0	2
SYNCRIP	0	0	0	1	0	0	1	0	2
SLC19A2	0	0	0	1	0	0	1	0	2
CPSF6	0	0	0	1	0	0	1	0	2
HIBADH	0	0	0	1	0	0	1	0	2
FGFR1OP	0	0	0	1	0	0	1	0	2
ERLIN2	0	0	0	1	0	0	1	0	2
NUDT3	0	0	0	1	0	0	1	0	2
AKAP11	0	0	0	1	0	0	1	0	2
CLSTN1	0	0	0	1	0	0	1	0	2
OTUD3	0	0	0	1	0	0	1	0	2
DICER1	0	0	0	1	0	0	1	0	2
ARL2BP	0	0	0	1	0	0	1	0	2
SH3BP4	0	0	0	1	0	0	1	0	2
CADM1	0	0	0	1	0	0	1	0	2
TOR1AIP1	0	0	0	1	0	0	1	0	2
DIMT1	0	0	0	1	0	0	1	0	2
GULP1	0	0	0	1	0	0	1	0	2
ANLN	0	0	0	1	0	0	1	0	2
MRPL50	0	0	0	1	0	0	1	0	2
UHRF1BP1	0	0	0	1	0	0	1	0	2
CHD7	0	0	0	1	0	0	1	0	2
TMEM30A	0	0	0	1	0	0	1	0	2
FANCM	0	0	0	1	0	0	1	0	2
CREBZF	0	0	0	1	0	0	1	0	2
AASDHPPT	0	0	0	1	0	0	1	0	2
CLSPN	0	0	0	1	0	0	1	0	2
ZMAT3	0	0	0	1	0	0	1	0	2
MPP5	0	0	0	1	0	0	1	0	2
NUCKS1	0	0	0	1	0	0	1	0	2
ZBTB10	0	0	0	1	0	0	1	0	2
OGFRL1	0	0	0	1	0	0	1	0	2
L2HGDH	0	0	0	1	0	0	1	0	2
RMI1	0	0	0	1	0	0	1	0	2
MEX3B	0	0	0	1	0	0	1	0	2
PCGF5	0	0	0	1	0	0	1	0	2
ZIC5	0	0	0	1	0	0	1	0	2
GLCCI1	0	0	0	1	0	0	1	0	2
KCTD12	0	0	0	1	0	0	1	0	2
LRRC58	0	0	0	1	0	0	1	0	2
LYSMD3	0	0	0	1	0	0	1	0	2
DCBLD2	0	0	0	1	0	0	1	0	2
PRRC1	0	0	0	1	0	0	1	0	2
FAM199X	0	0	0	1	0	0	1	0	2
TMTC3	0	0	0	1	0	0	1	0	2
FAM171B	0	0	0	1	0	0	1	0	2
FAM126B	0	0	0	1	0	0	1	0	2
NHLRC3	0	0	0	1	0	0	1	0	2
ZBTB34	0	0	0	1	0	0	1	0	2
ZFX	0	0	0	1	0	0	1	0	2
PUM2	0	0	0	1	0	0	1	0	2
HIPK2	0	0	0	1	0	0	1	0	2
CBFB	0	0	0	1	0	0	1	0	2
RORA	0	0	0	1	0	0	1	0	2
RAB21	0	0	0	1	0	0	1	0	2
HUWE1	0	0	0	1	0	0	1	0	2
SRRT	0	0	0	1	0	0	1	0	2
RBM27	0	0	0	1	0	0	1	0	2
TIMP3	0	0	0	1	0	0	1	0	2
TNRC6B	0	0	0	1	0	0	1	0	2
SLC1A5	0	0	0	1	0	0	1	0	2
RAB3D	0	0	0	1	0	0	1	0	2
DHX15	0	0	0	1	0	0	1	0	2
TRIM2	0	0	0	1	0	0	1	0	2
KLF3	0	0	0	1	0	0	1	0	2
ASH1L	0	0	0	1	0	0	1	0	2
SFPQ	0	0	0	1	0	0	1	0	2
PRRC2C	0	0	0	1	0	0	1	0	2
RAB14	0	0	0	1	0	0	1	0	2
SOX4	0	0	0	1	0	0	1	0	2
RLIM	0	0	0	1	0	0	1	0	2
NOTCH2	0	0	0	1	0	0	1	0	2
TMED7	0	0	0	1	0	0	1	0	2
LRRC1	0	0	0	1	0	0	1	0	2
BNIP2	0	0	0	1	0	0	1	0	2
CLTC	0	0	0	1	0	0	1	0	2
RAB5A	0	0	0	1	0	0	1	0	2
FEM1C	0	0	0	1	0	0	1	0	2
G3BP1	0	0	0	1	0	0	1	0	2
PHIP	0	0	0	1	0	0	1	0	2
LIN7C	0	0	0	1	0	0	1	0	2
ELK4	0	0	0	1	0	0	1	0	2
NSD1	0	0	0	1	0	0	1	0	2
B2M	0	0	0	1	0	0	1	0	2
ZEB2	0	0	0	1	0	0	1	0	2
HNRNPF	0	0	0	1	0	0	1	0	2
CDK1	0	0	0	1	0	0	1	0	2
SP3	0	0	0	1	0	0	1	0	2
AGFG1	0	0	0	1	0	0	1	0	2
ZBTB41	0	0	0	1	0	0	1	0	2
NRIP1	0	0	0	1	0	0	1	0	2
SF3B3	0	0	0	1	0	0	1	0	2
CD55	0	0	0	1	0	0	1	0	2
NHLRC2	0	0	0	1	0	0	1	0	2
ARHGEF12	0	0	0	1	0	0	1	0	2
HELZ	0	0	0	1	0	0	1	0	2
DMD	0	0	0	1	0	0	1	0	2
HSPA1A	0	0	0	1	0	0	1	0	2
TOMM6	0	0	0	1	0	0	1	0	2
ATXN1L	0	0	0	1	0	0	1	0	2
PISD	0	0	0	1	0	0	1	0	2
TXNIP	0	0	0	1	0	0	1	0	2
CHD4	0	0	0	0	1	0	1	0	2
RAD23B	0	0	0	0	1	0	1	0	2
PRKAA1	0	0	0	0	1	0	1	0	2
APP	0	0	0	0	1	0	1	0	2
SETD5	0	0	0	0	1	0	1	0	2
HIF1A	1	0	0	0	0	0	0	0	1
ZNF711	1	0	0	0	0	0	0	0	1
EIF3B	1	0	0	0	0	0	0	0	1
YWHAQ	1	0	0	0	0	0	0	0	1
RYBP	1	0	0	0	0	0	0	0	1
MBTD1	1	0	0	0	0	0	0	0	1
SETD7	1	0	0	0	0	0	0	0	1
STXBP4	1	0	0	0	0	0	0	0	1
PIM3	1	0	0	0	0	0	0	0	1
FBXL3	1	0	0	0	0	0	0	0	1
IDS	1	0	0	0	0	0	0	0	1
PTBP1	1	0	0	0	0	0	0	0	1
UFL1	1	0	0	0	0	0	0	0	1
SNAI2	1	0	0	0	0	0	0	0	1
BIRC3	1	0	0	0	0	0	0	0	1
SIKE1	1	0	0	0	0	0	0	0	1
SERTAD4	1	0	0	0	0	0	0	0	1
RANGAP1	1	0	0	0	0	0	0	0	1
ADNP	1	0	0	0	0	0	0	0	1
RNMT	1	0	0	0	0	0	0	0	1
EIF3J	1	0	0	0	0	0	0	0	1
GRB10	1	0	0	0	0	0	0	0	1
SRSF4	1	0	0	0	0	0	0	0	1
ERI3	1	0	0	0	0	0	0	0	1
STAG1	1	0	0	0	0	0	0	0	1
YLPM1	1	0	0	0	0	0	0	0	1
ETF1	1	0	0	0	0	0	0	0	1
CNOT1	1	0	0	0	0	0	0	0	1
PRR12	1	0	0	0	0	0	0	0	1
KLHDC10	1	0	0	0	0	0	0	0	1
CCNT1	1	0	0	0	0	0	0	0	1
ATXN10	1	0	0	0	0	0	0	0	1
LATS1	1	0	0	0	0	0	0	0	1
XPO4	1	0	0	0	0	0	0	0	1
ATP13A3	1	0	0	0	0	0	0	0	1
NAV1	1	0	0	0	0	0	0	0	1
ETS1	1	0	0	0	0	0	0	0	1
GCC2	1	0	0	0	0	0	0	0	1
CKAP2	1	0	0	0	0	0	0	0	1
RNF144B	1	0	0	0	0	0	0	0	1
KIF21A	1	0	0	0	0	0	0	0	1
FBLN5	1	0	0	0	0	0	0	0	1
NIPA2	1	0	0	0	0	0	0	0	1
ABL2	1	0	0	0	0	0	0	0	1
ARF1	1	0	0	0	0	0	0	0	1
DYNLT1	1	0	0	0	0	0	0	0	1
HSPB8	1	0	0	0	0	0	0	0	1
SLC26A2	1	0	0	0	0	0	0	0	1
EIF5B	1	0	0	0	0	0	0	0	1
SON	1	0	0	0	0	0	0	0	1
TSC1	1	0	0	0	0	0	0	0	1
COPS2	1	0	0	0	0	0	0	0	1
YWHAB	1	0	0	0	0	0	0	0	1
GREM1	1	0	0	0	0	0	0	0	1
FAM102A	1	0	0	0	0	0	0	0	1
GATAD2A	1	0	0	0	0	0	0	0	1
PDCD6IP	1	0	0	0	0	0	0	0	1
SLC30A1	1	0	0	0	0	0	0	0	1
PHC3	1	0	0	0	0	0	0	0	1
CDK5R1	1	0	0	0	0	0	0	0	1
CHD9	1	0	0	0	0	0	0	0	1
MAGEF1	1	0	0	0	0	0	0	0	1
KLHL28	1	0	0	0	0	0	0	0	1
COPB2	1	0	0	0	0	0	0	0	1
PPP1CC	1	0	0	0	0	0	0	0	1
BLOC1S2	1	0	0	0	0	0	0	0	1
DDI2	1	0	0	0	0	0	0	0	1
BAZ1A	1	0	0	0	0	0	0	0	1
ZNF652	1	0	0	0	0	0	0	0	1
PRKDC	1	0	0	0	0	0	0	0	1
DHFR	0	0	0	1	0	0	0	0	1
ACADSB	0	0	0	1	0	0	0	0	1
ACVR2A	0	0	0	1	0	0	0	0	1
ALCAM	0	0	0	1	0	0	0	0	1
APC	0	0	0	1	0	0	0	0	1
ASPH	0	0	0	1	0	0	0	0	1
BARD1	0	0	0	1	0	0	0	0	1
BCL2	0	0	0	1	0	0	0	0	1
BLM	0	0	0	1	0	0	0	0	1
BMI1	0	0	0	1	0	0	0	0	1
BRCA1	0	0	0	1	0	0	0	0	1
BRCA2	0	0	0	1	0	0	0	0	1
BUB1B	0	0	0	1	0	0	0	0	1
BYSL	0	0	0	1	0	0	0	0	1
CA8	0	0	0	1	0	0	0	0	1
CAMK4	0	0	0	1	0	0	0	0	1
CAV1	0	0	0	1	0	0	0	0	1
CDC20	0	0	0	1	0	0	0	0	1
CDC25A	0	0	0	1	0	0	0	0	1
CDKN2A	0	0	0	1	0	0	0	0	1
CDKN3	0	0	0	1	0	0	0	0	1
CENPA	0	0	0	1	0	0	0	0	1
CENPE	0	0	0	1	0	0	0	0	1
CENPF	0	0	0	1	0	0	0	0	1
CLK1	0	0	0	1	0	0	0	0	1
CYP24A1	0	0	0	1	0	0	0	0	1
DDOST	0	0	0	1	0	0	0	0	1
COCH	0	0	0	1	0	0	0	0	1
DHCR24	0	0	0	1	0	0	0	0	1
DYRK1A	0	0	0	1	0	0	0	0	1
E2F5	0	0	0	1	0	0	0	0	1
ECT2	0	0	0	1	0	0	0	0	1
EFNB2	0	0	0	1	0	0	0	0	1
ACSL1	0	0	0	1	0	0	0	0	1
FEN1	0	0	0	1	0	0	0	0	1
GPC4	0	0	0	1	0	0	0	0	1
CENPI	0	0	0	1	0	0	0	0	1
HMGCS1	0	0	0	1	0	0	0	0	1
HMMR	0	0	0	1	0	0	0	0	1
ID2	0	0	0	1	0	0	0	0	1
IFRD1	0	0	0	1	0	0	0	0	1
ITGB1	0	0	0	1	0	0	0	0	1
KIF5C	0	0	0	1	0	0	0	0	1
KPNA5	0	0	0	1	0	0	0	0	1
LMAN1	0	0	0	1	0	0	0	0	1
MCM3	0	0	0	1	0	0	0	0	1
DNAJB9	0	0	0	1	0	0	0	0	1
MYB	0	0	0	1	0	0	0	0	1
NAB1	0	0	0	1	0	0	0	0	1
NBN	0	0	0	1	0	0	0	0	1
NCBP1	0	0	0	1	0	0	0	0	1
NFYA	0	0	0	1	0	0	0	0	1
NID1	0	0	0	1	0	0	0	0	1
NSF	0	0	0	1	0	0	0	0	1
ODC1	0	0	0	1	0	0	0	0	1
OPA1	0	0	0	1	0	0	0	0	1
ORC1	0	0	0	1	0	0	0	0	1
ORC4	0	0	0	1	0	0	0	0	1
PLOD1	0	0	0	1	0	0	0	0	1
UBL3	0	0	0	1	0	0	0	0	1
PODXL	0	0	0	1	0	0	0	0	1
PPARG	0	0	0	1	0	0	0	0	1
PRKAR1A	0	0	0	1	0	0	0	0	1
MAPK9	0	0	0	1	0	0	0	0	1
PRNP	0	0	0	1	0	0	0	0	1
PSMB5	0	0	0	1	0	0	0	0	1
PTPRE	0	0	0	1	0	0	0	0	1
PTS	0	0	0	1	0	0	0	0	1
RAD51	0	0	0	1	0	0	0	0	1
RNASEL	0	0	0	1	0	0	0	0	1
RPS6KB1	0	0	0	1	0	0	0	0	1
STIL	0	0	0	1	0	0	0	0	1
SPTBN1	0	0	0	1	0	0	0	0	1
SRD5A1	0	0	0	1	0	0	0	0	1
SS18	0	0	0	1	0	0	0	0	1
TPM4	0	0	0	1	0	0	0	0	1
TTK	0	0	0	1	0	0	0	0	1
UGT8	0	0	0	1	0	0	0	0	1
USP1	0	0	0	1	0	0	0	0	1
WT1	0	0	0	1	0	0	0	0	1
XK	0	0	0	1	0	0	0	0	1
ZNF85	0	0	0	1	0	0	0	0	1
BRD3	0	0	0	1	0	0	0	0	1
CUL5	0	0	0	1	0	0	0	0	1
NCOA3	0	0	0	1	0	0	0	0	1
FZD1	0	0	0	1	0	0	0	0	1
FZD4	0	0	0	1	0	0	0	0	1
PIP4K2B	0	0	0	1	0	0	0	0	1
CUL3	0	0	0	1	0	0	0	0	1
TTF2	0	0	0	1	0	0	0	0	1
RANBP3	0	0	0	1	0	0	0	0	1
ENC1	0	0	0	1	0	0	0	0	1
CDC14A	0	0	0	1	0	0	0	0	1
ABCC3	0	0	0	1	0	0	0	0	1
PABPC4	0	0	0	1	0	0	0	0	1
CD164	0	0	0	1	0	0	0	0	1
SAP30	0	0	0	1	0	0	0	0	1
IQGAP1	0	0	0	1	0	0	0	0	1
FUBP1	0	0	0	1	0	0	0	0	1
LRRFIP2	0	0	0	1	0	0	0	0	1
TRIP13	0	0	0	1	0	0	0	0	1
ZNHIT3	0	0	0	1	0	0	0	0	1
TJP2	0	0	0	1	0	0	0	0	1
KIF23	0	0	0	1	0	0	0	0	1
ATP6V1G1	0	0	0	1	0	0	0	0	1
KIF20B	0	0	0	1	0	0	0	0	1
DLGAP5	0	0	0	1	0	0	0	0	1
MTSS1	0	0	0	1	0	0	0	0	1
ARHGAP11A	0	0	0	1	0	0	0	0	1
EPM2AIP1	0	0	0	1	0	0	0	0	1
SEC24D	0	0	0	1	0	0	0	0	1
KIF14	0	0	0	1	0	0	0	0	1
ZBTB33	0	0	0	1	0	0	0	0	1
TROAP	0	0	0	1	0	0	0	0	1
KIF20A	0	0	0	1	0	0	0	0	1
AKAP9	0	0	0	1	0	0	0	0	1
TFG	0	0	0	1	0	0	0	0	1
ARFGEF1	0	0	0	1	0	0	0	0	1
SMC2	0	0	0	1	0	0	0	0	1
POLQ	0	0	0	1	0	0	0	0	1
TCFL5	0	0	0	1	0	0	0	0	1
PLK4	0	0	0	1	0	0	0	0	1
ZMYND11	0	0	0	1	0	0	0	0	1
ZBTB6	0	0	0	1	0	0	0	0	1
RAB40B	0	0	0	1	0	0	0	0	1
TMED10	0	0	0	1	0	0	0	0	1
DNAJB4	0	0	0	1	0	0	0	0	1
PRSS23	0	0	0	1	0	0	0	0	1
PRDM4	0	0	0	1	0	0	0	0	1
RASSF8	0	0	0	1	0	0	0	0	1
RHOBTB3	0	0	0	1	0	0	0	0	1
COBLL1	0	0	0	1	0	0	0	0	1
RAB11FIP2	0	0	0	1	0	0	0	0	1
ENPP4	0	0	0	1	0	0	0	0	1
ELL2	0	0	0	1	0	0	0	0	1
FNBP1	0	0	0	1	0	0	0	0	1
SNX13	0	0	0	1	0	0	0	0	1
NCAPH	0	0	0	1	0	0	0	0	1
MACF1	0	0	0	1	0	0	0	0	1
ZNF346	0	0	0	1	0	0	0	0	1
POLA2	0	0	0	1	0	0	0	0	1
BCL2L13	0	0	0	1	0	0	0	0	1
PANX1	0	0	0	1	0	0	0	0	1
RAD54B	0	0	0	1	0	0	0	0	1
LRIG1	0	0	0	1	0	0	0	0	1
APPL1	0	0	0	1	0	0	0	0	1
PHF19	0	0	0	1	0	0	0	0	1
FBXW2	0	0	0	1	0	0	0	0	1
FBXO3	0	0	0	1	0	0	0	0	1
SLC39A1	0	0	0	1	0	0	0	0	1
TOR1B	0	0	0	1	0	0	0	0	1
SLCO3A1	0	0	0	1	0	0	0	0	1
NOB1	0	0	0	1	0	0	0	0	1
RACGAP1	0	0	0	1	0	0	0	0	1
COPS7A	0	0	0	1	0	0	0	0	1
METTL9	0	0	0	1	0	0	0	0	1
NAA20	0	0	0	1	0	0	0	0	1
PLCE1	0	0	0	1	0	0	0	0	1
NIN	0	0	0	1	0	0	0	0	1
ZDHHC2	0	0	0	1	0	0	0	0	1
RAB23	0	0	0	1	0	0	0	0	1
CMPK1	0	0	0	1	0	0	0	0	1
COQ3	0	0	0	1	0	0	0	0	1
CYCS	0	0	0	1	0	0	0	0	1
RSBN1	0	0	0	1	0	0	0	0	1
ERCC6L	0	0	0	1	0	0	0	0	1
VPS13C	0	0	0	1	0	0	0	0	1
PARP16	0	0	0	1	0	0	0	0	1
CLN6	0	0	0	1	0	0	0	0	1
CDCA4	0	0	0	1	0	0	0	0	1
RFWD3	0	0	0	1	0	0	0	0	1
CEP55	0	0	0	1	0	0	0	0	1
RIC8B	0	0	0	1	0	0	0	0	1
BBS7	0	0	0	1	0	0	0	0	1
FANCI	0	0	0	1	0	0	0	0	1
NEIL3	0	0	0	1	0	0	0	0	1
MIS18BP1	0	0	0	1	0	0	0	0	1
AGPAT5	0	0	0	1	0	0	0	0	1
SLC39A9	0	0	0	1	0	0	0	0	1
HJURP	0	0	0	1	0	0	0	0	1
CHST12	0	0	0	1	0	0	0	0	1
G2E3	0	0	0	1	0	0	0	0	1
DEPDC1	0	0	0	1	0	0	0	0	1
CAND1	0	0	0	1	0	0	0	0	1
CTPS2	0	0	0	1	0	0	0	0	1
KIF15	0	0	0	1	0	0	0	0	1
CHPT1	0	0	0	1	0	0	0	0	1
CTNNBIP1	0	0	0	1	0	0	0	0	1
CCDC47	0	0	0	1	0	0	0	0	1
ENTPD7	0	0	0	1	0	0	0	0	1
ATP10D	0	0	0	1	0	0	0	0	1
NHSL1	0	0	0	1	0	0	0	0	1
CLK4	0	0	0	1	0	0	0	0	1
KIAA1143	0	0	0	1	0	0	0	0	1
MIB1	0	0	0	1	0	0	0	0	1
PHF12	0	0	0	1	0	0	0	0	1
PTBP2	0	0	0	1	0	0	0	0	1
ELOVL5	0	0	0	1	0	0	0	0	1
SPCS3	0	0	0	1	0	0	0	0	1
PERP	0	0	0	1	0	0	0	0	1
CENPK	0	0	0	1	0	0	0	0	1
SLC39A8	0	0	0	1	0	0	0	0	1
FNDC3B	0	0	0	1	0	0	0	0	1
ELOVL1	0	0	0	1	0	0	0	0	1
REEP1	0	0	0	1	0	0	0	0	1
MIS12	0	0	0	1	0	0	0	0	1
DDX54	0	0	0	1	0	0	0	0	1
RNF26	0	0	0	1	0	0	0	0	1
HAUS3	0	0	0	1	0	0	0	0	1
RPAP3	0	0	0	1	0	0	0	0	1
HSPBAP1	0	0	0	1	0	0	0	0	1
PLEKHF2	0	0	0	1	0	0	0	0	1
NOL9	0	0	0	1	0	0	0	0	1
CLIP4	0	0	0	1	0	0	0	0	1
ZMYM1	0	0	0	1	0	0	0	0	1
ATAD5	0	0	0	1	0	0	0	0	1
ERMP1	0	0	0	1	0	0	0	0	1
WDR76	0	0	0	1	0	0	0	0	1
DSN1	0	0	0	1	0	0	0	0	1
CCDC15	0	0	0	1	0	0	0	0	1
PIF1	0	0	0	1	0	0	0	0	1
DBF4B	0	0	0	1	0	0	0	0	1
NAA50	0	0	0	1	0	0	0	0	1
FAM83D	0	0	0	1	0	0	0	0	1
MAP1LC3B	0	0	0	1	0	0	0	0	1
SPRY4	0	0	0	1	0	0	0	0	1
KIF18A	0	0	0	1	0	0	0	0	1
NUF2	0	0	0	1	0	0	0	0	1
KATNAL1	0	0	0	1	0	0	0	0	1
ZNRF3	0	0	0	1	0	0	0	0	1
DCUN1D5	0	0	0	1	0	0	0	0	1
FAM126A	0	0	0	1	0	0	0	0	1
PSRC1	0	0	0	1	0	0	0	0	1
TMTC4	0	0	0	1	0	0	0	0	1
UBASH3B	0	0	0	1	0	0	0	0	1
FHDC1	0	0	0	1	0	0	0	0	1
ZC3H12C	0	0	0	1	0	0	0	0	1
OSBPL8	0	0	0	1	0	0	0	0	1
NIPA1	0	0	0	1	0	0	0	0	1
CRYBG3	0	0	0	1	0	0	0	0	1
EMB	0	0	0	1	0	0	0	0	1
AFAP1L1	0	0	0	1	0	0	0	0	1
HINT3	0	0	0	1	0	0	0	0	1
MIPOL1	0	0	0	1	0	0	0	0	1
EME1	0	0	0	1	0	0	0	0	1
LSM14B	0	0	0	1	0	0	0	0	1
CKAP2L	0	0	0	1	0	0	0	0	1
SLC16A14	0	0	0	1	0	0	0	0	1
SLC35G1	0	0	0	1	0	0	0	0	1
GPR180	0	0	0	1	0	0	0	0	1
ZFP1	0	0	0	1	0	0	0	0	1
SGMS2	0	0	0	1	0	0	0	0	1
ZNF449	0	0	0	1	0	0	0	0	1
HYLS1	0	0	0	1	0	0	0	0	1
SKA1	0	0	0	1	0	0	0	0	1
KDM1B	0	0	0	1	0	0	0	0	1
MSRB3	0	0	0	1	0	0	0	0	1
ZDHHC23	0	0	0	1	0	0	0	0	1
ASPM	0	0	0	1	0	0	0	0	1
GAS2L3	0	0	0	1	0	0	0	0	1
GPR137C	0	0	0	1	0	0	0	0	1
RIMKLA	0	0	0	1	0	0	0	0	1
CCDC18	0	0	0	1	0	0	0	0	1
KIF24	0	0	0	1	0	0	0	0	1
GEN1	0	0	0	1	0	0	0	0	1
ZNF704	0	0	0	1	0	0	0	0	1
KRIT1	0	0	0	1	0	0	0	0	1
MYLIP	0	0	0	1	0	0	0	0	1
RAB27B	0	0	0	1	0	0	0	0	1
KIFC1	0	0	0	1	0	0	0	0	1
RDH11	0	0	0	1	0	0	0	0	1
NFATC3	0	0	0	1	0	0	0	0	1
FSCN1	0	0	0	1	0	0	0	0	1
ACTB	0	0	0	1	0	0	0	0	1
KIFAP3	0	0	0	1	0	0	0	0	1
GPR137B	0	0	0	1	0	0	0	0	1
CXCL2	0	0	0	1	0	0	0	0	1
B4GALT1	0	0	0	1	0	0	0	0	1
DDX24	0	0	0	1	0	0	0	0	1
HIVEP1	0	0	0	1	0	0	0	0	1
DSP	0	0	0	1	0	0	0	0	1
MTAP	0	0	0	1	0	0	0	0	1
TOMM22	0	0	0	1	0	0	0	0	1
GTPBP1	0	0	0	1	0	0	0	0	1
TXN2	0	0	0	1	0	0	0	0	1
DAAM1	0	0	0	1	0	0	0	0	1
APEX1	0	0	0	1	0	0	0	0	1
KPNA3	0	0	0	1	0	0	0	0	1
GSK3A	0	0	0	1	0	0	0	0	1
CLIP2	0	0	0	1	0	0	0	0	1
MPP2	0	0	0	1	0	0	0	0	1
CCDC86	0	0	0	1	0	0	0	0	1
ATN1	0	0	0	1	0	0	0	0	1
GPR63	0	0	0	1	0	0	0	0	1
PTP4A1	0	0	0	1	0	0	0	0	1
ATP6V0E1	0	0	0	1	0	0	0	0	1
MRPL3	0	0	0	1	0	0	0	0	1
AUP1	0	0	0	1	0	0	0	0	1
CCT4	0	0	0	1	0	0	0	0	1
EHBP1	0	0	0	1	0	0	0	0	1
ICMT	0	0	0	1	0	0	0	0	1
KCNC4	0	0	0	1	0	0	0	0	1
UCHL3	0	0	0	1	0	0	0	0	1
SENP5	0	0	0	1	0	0	0	0	1
CBX3	0	0	0	1	0	0	0	0	1
GTF3C4	0	0	0	1	0	0	0	0	1
CAPNS1	0	0	0	1	0	0	0	0	1
ZNF384	0	0	0	1	0	0	0	0	1
CANX	0	0	0	1	0	0	0	0	1
HEATR5A	0	0	0	1	0	0	0	0	1
RPA1	0	0	0	1	0	0	0	0	1
DCAF8	0	0	0	1	0	0	0	0	1
ARF3	0	0	0	1	0	0	0	0	1
MDM2	0	0	0	1	0	0	0	0	1
IL6	0	0	0	1	0	0	0	0	1
MYC	0	0	0	1	0	0	0	0	1
ANXA7	0	0	0	1	0	0	0	0	1
TARBP2	0	0	0	1	0	0	0	0	1
DPP9	0	0	0	1	0	0	0	0	1
GFOD1	0	0	0	1	0	0	0	0	1
GIGYF1	0	0	0	1	0	0	0	0	1
NONO	0	0	0	1	0	0	0	0	1
VLDLR	0	0	0	1	0	0	0	0	1
CELF1	0	0	0	1	0	0	0	0	1
DLAT	0	0	0	1	0	0	0	0	1
ANKRD40	0	0	0	1	0	0	0	0	1
PCDH1	0	0	0	1	0	0	0	0	1
SLC37A3	0	0	0	1	0	0	0	0	1
TYW3	0	0	0	1	0	0	0	0	1
WDR82	0	0	0	1	0	0	0	0	1
NIPBL	0	0	0	1	0	0	0	0	1
RICTOR	0	0	0	1	0	0	0	0	1
DLC1	0	0	0	1	0	0	0	0	1
TP53INP1	0	0	0	1	0	0	0	0	1
UBAP1	0	0	0	1	0	0	0	0	1
NOLC1	0	0	0	1	0	0	0	0	1
CDK12	0	0	0	1	0	0	0	0	1
IRGQ	0	0	0	1	0	0	0	0	1
RAB8A	0	0	0	1	0	0	0	0	1
AXL	0	0	0	1	0	0	0	0	1
SRRM2	0	0	0	1	0	0	0	0	1
LTBP3	0	0	0	1	0	0	0	0	1
REEP4	0	0	0	1	0	0	0	0	1
PWWP2A	0	0	0	1	0	0	0	0	1
SOCS6	0	0	0	1	0	0	0	0	1
POLR1C	0	0	0	1	0	0	0	0	1
EXO1	0	0	0	1	0	0	0	0	1
CTDSP2	0	0	0	1	0	0	0	0	1
MCFD2	0	0	0	1	0	0	0	0	1
POLR2A	0	0	0	1	0	0	0	0	1
SETD2	0	0	0	1	0	0	0	0	1
CREB3L2	0	0	0	1	0	0	0	0	1
CBX6	0	0	0	1	0	0	0	0	1
XPOT	0	0	0	1	0	0	0	0	1
GPATCH8	0	0	0	1	0	0	0	0	1
ENTPD5	0	0	0	1	0	0	0	0	1
S100A16	0	0	0	1	0	0	0	0	1
TUBB	0	0	0	1	0	0	0	0	1
TBC1D9B	0	0	0	1	0	0	0	0	1
HTT	0	0	0	1	0	0	0	0	1
SLC5A3	0	0	0	1	0	0	0	0	1
PNP	0	0	0	1	0	0	0	0	1
NFKBIL1	0	0	0	1	0	0	0	0	1
HMGN1	0	0	0	1	0	0	0	0	1
RBM12	0	0	0	1	0	0	0	0	1
MLLT6	0	0	0	1	0	0	0	0	1
DUSP14	0	0	0	1	0	0	0	0	1
TPR	0	0	0	0	1	0	0	0	1
CYLD	0	0	0	0	1	0	0	0	1
EIF4A1	0	0	0	0	1	0	0	0	1
ZBTB7A	0	0	0	0	1	0	0	0	1
DDX39B	0	0	0	0	1	0	0	0	1
POLR3D	0	0	0	0	0	1	0	0	1
PTGS2	0	0	0	0	0	0	1	0	1
AMD1	0	0	0	0	0	0	1	0	1
BIRC5	0	0	0	0	0	0	1	0	1
BCL9	0	0	0	0	0	0	1	0	1
PRDM1	0	0	0	0	0	0	1	0	1
ZFP36L2	0	0	0	0	0	0	1	0	1
CCNF	0	0	0	0	0	0	1	0	1
CD81	0	0	0	0	0	0	1	0	1
CDK8	0	0	0	0	0	0	1	0	1
CDKN1A	0	0	0	0	0	0	1	0	1
KLF6	0	0	0	0	0	0	1	0	1
CTNNB1	0	0	0	0	0	0	1	0	1
DCTD	0	0	0	0	0	0	1	0	1
DYNC1LI2	0	0	0	0	0	0	1	0	1
DUSP1	0	0	0	0	0	0	1	0	1
E2F3	0	0	0	0	0	0	1	0	1
NR2F6	0	0	0	0	0	0	1	0	1
EYA1	0	0	0	0	0	0	1	0	1
MTOR	0	0	0	0	0	0	1	0	1
GNB1	0	0	0	0	0	0	1	0	1
GRSF1	0	0	0	0	0	0	1	0	1
HNRNPU	0	0	0	0	0	0	1	0	1
DNAJA1	0	0	0	0	0	0	1	0	1
HSP90AA1	0	0	0	0	0	0	1	0	1
JAK2	0	0	0	0	0	0	1	0	1
JUN	0	0	0	0	0	0	1	0	1
KPNA2	0	0	0	0	0	0	1	0	1
LBR	0	0	0	0	0	0	1	0	1
LIFR	0	0	0	0	0	0	1	0	1
MBNL1	0	0	0	0	0	0	1	0	1
CD46	0	0	0	0	0	0	1	0	1
MEIS1	0	0	0	0	0	0	1	0	1
MET	0	0	0	0	0	0	1	0	1
MKLN1	0	0	0	0	0	0	1	0	1
MSH2	0	0	0	0	0	0	1	0	1
NACA	0	0	0	0	0	0	1	0	1
SLC11A2	0	0	0	0	0	0	1	0	1
PIK3C2B	0	0	0	0	0	0	1	0	1
PIP4K2A	0	0	0	0	0	0	1	0	1
PLAG1	0	0	0	0	0	0	1	0	1
PRKAB1	0	0	0	0	0	0	1	0	1
MAP2K1	0	0	0	0	0	0	1	0	1
RAC1	0	0	0	0	0	0	1	0	1
REL	0	0	0	0	0	0	1	0	1
RRM2	0	0	0	0	0	0	1	0	1
SMARCD1	0	0	0	0	0	0	1	0	1
SREBF2	0	0	0	0	0	0	1	0	1
STYX	0	0	0	0	0	0	1	0	1
TAF13	0	0	0	0	0	0	1	0	1
ZEB1	0	0	0	0	0	0	1	0	1
TFAP4	0	0	0	0	0	0	1	0	1
TGFBR2	0	0	0	0	0	0	1	0	1
TGFBR3	0	0	0	0	0	0	1	0	1
TNFAIP1	0	0	0	0	0	0	1	0	1
TSN	0	0	0	0	0	0	1	0	1
UBE2A	0	0	0	0	0	0	1	0	1
UBE2D3	0	0	0	0	0	0	1	0	1
VEGFA	0	0	0	0	0	0	1	0	1
VEGFC	0	0	0	0	0	0	1	0	1
VHL	0	0	0	0	0	0	1	0	1
WNT7A	0	0	0	0	0	0	1	0	1
BTG2	0	0	0	0	0	0	1	0	1
REEP5	0	0	0	0	0	0	1	0	1
GAN	0	0	0	0	0	0	1	0	1
FZD6	0	0	0	0	0	0	1	0	1
DYRK2	0	0	0	0	0	0	1	0	1
SMARCA5	0	0	0	0	0	0	1	0	1
CBX4	0	0	0	0	0	0	1	0	1
PIAS1	0	0	0	0	0	0	1	0	1
STX16	0	0	0	0	0	0	1	0	1
CDC123	0	0	0	0	0	0	1	0	1
BTRC	0	0	0	0	0	0	1	0	1
INA	0	0	0	0	0	0	1	0	1
VAPA	0	0	0	0	0	0	1	0	1
RPS6KA5	0	0	0	0	0	0	1	0	1
CTR9	0	0	0	0	0	0	1	0	1
N4BP1	0	0	0	0	0	0	1	0	1
BZW1	0	0	0	0	0	0	1	0	1
MLEC	0	0	0	0	0	0	1	0	1
TSC22D2	0	0	0	0	0	0	1	0	1
SPATA2	0	0	0	0	0	0	1	0	1
ZC3H11A	0	0	0	0	0	0	1	0	1
PPP4R1	0	0	0	0	0	0	1	0	1
RANBP9	0	0	0	0	0	0	1	0	1
MBNL2	0	0	0	0	0	0	1	0	1
IPO7	0	0	0	0	0	0	1	0	1
TGOLN2	0	0	0	0	0	0	1	0	1
FRS2	0	0	0	0	0	0	1	0	1
KIF2C	0	0	0	0	0	0	1	0	1
FNDC3A	0	0	0	0	0	0	1	0	1
SACM1L	0	0	0	0	0	0	1	0	1
XPO7	0	0	0	0	0	0	1	0	1
TBC1D12	0	0	0	0	0	0	1	0	1
PHF3	0	0	0	0	0	0	1	0	1
SLC39A6	0	0	0	0	0	0	1	0	1
ANKRD17	0	0	0	0	0	0	1	0	1
AP3M1	0	0	0	0	0	0	1	0	1
AFF4	0	0	0	0	0	0	1	0	1
ANKRD11	0	0	0	0	0	0	1	0	1
USP25	0	0	0	0	0	0	1	0	1
TMED5	0	0	0	0	0	0	1	0	1
GOLGA7	0	0	0	0	0	0	1	0	1
PANK1	0	0	0	0	0	0	1	0	1
IL20RB	0	0	0	0	0	0	1	0	1
SLC38A2	0	0	0	0	0	0	1	0	1
OTUD4	0	0	0	0	0	0	1	0	1
RNF111	0	0	0	0	0	0	1	0	1
INO80D	0	0	0	0	0	0	1	0	1
FBXW7	0	0	0	0	0	0	1	0	1
VEZT	0	0	0	0	0	0	1	0	1
NXT2	0	0	0	0	0	0	1	0	1
SPIRE1	0	0	0	0	0	0	1	0	1
RTN4	0	0	0	0	0	0	1	0	1
NUFIP2	0	0	0	0	0	0	1	0	1
RNF213	0	0	0	0	0	0	1	0	1
GPAM	0	0	0	0	0	0	1	0	1
RAP2C	0	0	0	0	0	0	1	0	1
PLEKHA1	0	0	0	0	0	0	1	0	1
TGIF2	0	0	0	0	0	0	1	0	1
TMEM168	0	0	0	0	0	0	1	0	1
SLC30A5	0	0	0	0	0	0	1	0	1
MRPL44	0	0	0	0	0	0	1	0	1
PLEKHA3	0	0	0	0	0	0	1	0	1
NKAP	0	0	0	0	0	0	1	0	1
QSER1	0	0	0	0	0	0	1	0	1
RAB11FIP1	0	0	0	0	0	0	1	0	1
ORAI2	0	0	0	0	0	0	1	0	1
AMMECR1L	0	0	0	0	0	0	1	0	1
ARID5B	0	0	0	0	0	0	1	0	1
FAR1	0	0	0	0	0	0	1	0	1
NACC1	0	0	0	0	0	0	1	0	1
ARAP2	0	0	0	0	0	0	1	0	1
AEBP2	0	0	0	0	0	0	1	0	1
FRMD6	0	0	0	0	0	0	1	0	1
NAA30	0	0	0	0	0	0	1	0	1
AP1S3	0	0	0	0	0	0	1	0	1
NEK7	0	0	0	0	0	0	1	0	1
ZNF827	0	0	0	0	0	0	1	0	1
DENND5B	0	0	0	0	0	0	1	0	1
UBN2	0	0	0	0	0	0	1	0	1
ZDHHC24	0	0	0	0	0	0	1	0	1
CHAMP1	0	0	0	0	0	0	1	0	1
SREK1IP1	0	0	0	0	0	0	1	0	1
CYP51A1	0	0	0	0	0	0	1	0	1
CDC27	0	0	0	0	0	0	1	0	1
DHX33	0	0	0	0	0	0	1	0	1
GDE1	0	0	0	0	0	0	1	0	1
MAP3K9	0	0	0	0	0	0	1	0	1
SYPL1	0	0	0	0	0	0	1	0	1
SEC62	0	0	0	0	0	0	1	0	1
CSDE1	0	0	0	0	0	0	1	0	1
UBE3C	0	0	0	0	0	0	1	0	1
NISCH	0	0	0	0	0	0	1	0	1
RNF216	0	0	0	0	0	0	1	0	1
TMEM159	0	0	0	0	0	0	1	0	1
MBTPS2	0	0	0	0	0	0	1	0	1
GPRC5A	0	0	0	0	0	0	1	0	1
ATP2C1	0	0	0	0	0	0	1	0	1
FHL1	0	0	0	0	0	0	1	0	1
FAS	0	0	0	0	0	0	1	0	1
CD44	0	0	0	0	0	0	1	0	1
TBPL1	0	0	0	0	0	0	1	0	1
VCL	0	0	0	0	0	0	1	0	1
MAT2B	0	0	0	0	0	0	1	0	1
TRIO	0	0	0	0	0	0	1	0	1
MED17	0	0	0	0	0	0	1	0	1
DCUN1D1	0	0	0	0	0	0	1	0	1
DSG2	0	0	0	0	0	0	1	0	1
MAP4	0	0	0	0	0	0	1	0	1
CELF2	0	0	0	0	0	0	1	0	1
VAMP3	0	0	0	0	0	0	1	0	1
KIF1B	0	0	0	0	0	0	1	0	1
RC3H2	0	0	0	0	0	0	1	0	1
CDK17	0	0	0	0	0	0	1	0	1
MON2	0	0	0	0	0	0	1	0	1
SLC12A2	0	0	0	0	0	0	1	0	1
WDR3	0	0	0	0	0	0	1	0	1
ZC3H15	0	0	0	0	0	0	1	0	1
MTHFD2	0	0	0	0	0	0	1	0	1
ISOC1	0	0	0	0	0	0	1	0	1
ACSL4	0	0	0	0	0	0	1	0	1
PRR11	0	0	0	0	0	0	1	0	1
PSME4	0	0	0	0	0	0	1	0	1
MAPK6	0	0	0	0	0	0	1	0	1
PFN2	0	0	0	0	0	0	1	0	1
SLC44A1	0	0	0	0	0	0	1	0	1
EXOC5	0	0	0	0	0	0	1	0	1
DGCR2	0	0	0	0	0	0	1	0	1
NDST1	0	0	0	0	0	0	1	0	1
MGAT4A	0	0	0	0	0	0	1	0	1
SEL1L	0	0	0	0	0	0	1	0	1
TRHDE	0	0	0	0	0	0	1	0	1
FBXW11	0	0	0	0	0	0	1	0	1
PICALM	0	0	0	0	0	0	1	0	1
CLASP1	0	0	0	0	0	0	1	0	1
CA12	0	0	0	0	0	0	1	0	1
NTN4	0	0	0	0	0	0	1	0	1
DPP8	0	0	0	0	0	0	1	0	1
SEMA3C	0	0	0	0	0	0	1	0	1
ADD2	0	0	0	0	0	0	1	0	1
SLC25A3	0	0	0	0	0	0	1	0	1
FOSL2	0	0	0	0	0	0	1	0	1
BAZ2A	0	0	0	0	0	0	1	0	1
TPD52	0	0	0	0	0	0	1	0	1
PIAS2	0	0	0	0	0	0	1	0	1
EDN1	0	0	0	0	0	0	1	0	1
MLLT10	0	0	0	0	0	0	1	0	1
TNRC6C	0	0	0	0	0	0	1	0	1
XRCC5	0	0	0	0	0	0	1	0	1
DDX1	0	0	0	0	0	0	1	0	1
RFX3	0	0	0	0	0	0	1	0	1
PSEN1	0	0	0	0	0	0	1	0	1
CLDND1	0	0	0	0	0	0	1	0	1
RBL1	0	0	0	0	0	0	1	0	1
DLGAP4	0	0	0	0	0	0	1	0	1
CDC14B	0	0	0	0	0	0	1	0	1
CCNT2	0	0	0	0	0	0	1	0	1
GSK3B	0	0	0	0	0	0	1	0	1
PDS5B	0	0	0	0	0	0	1	0	1
OXCT1	0	0	0	0	0	0	1	0	1
ZNF264	0	0	0	0	0	0	1	0	1
YTHDC1	0	0	0	0	0	0	1	0	1
APLP2	0	0	0	0	0	0	1	0	1
ATRX	0	0	0	0	0	0	1	0	1
RRN3	0	0	0	0	0	0	1	0	1
DDHD2	0	0	0	0	0	0	1	0	1
RBM22	0	0	0	0	0	0	1	0	1
ZFAND6	0	0	0	0	0	0	1	0	1
MTMR2	0	0	0	0	0	0	1	0	1
ATXN7L3	0	0	0	0	0	0	1	0	1
TXNDC16	0	0	0	0	0	0	1	0	1
PTPN4	0	0	0	0	0	0	1	0	1
MAVS	0	0	0	0	0	0	1	0	1
SLC23A2	0	0	0	0	0	0	1	0	1
SLC9A1	0	0	0	0	0	0	1	0	1
TNRC6A	0	0	0	0	0	0	1	0	1
ZFHX4	0	0	0	0	0	0	1	0	1
HECTD1	0	0	0	0	0	0	1	0	1
COMT	0	0	0	0	0	0	1	0	1
ARCN1	0	0	0	0	0	0	1	0	1
EPB41L4B	0	0	0	0	0	0	1	0	1
BTAF1	0	0	0	0	0	0	1	0	1
IL11	0	0	0	0	0	0	1	0	1
NRP1	0	0	0	0	0	0	1	0	1
FBXL19	0	0	0	0	0	0	1	0	1
CIRBP	0	0	0	0	0	0	1	0	1
MAPK1	0	0	0	0	0	0	1	0	1
CARD10	0	0	0	0	0	0	1	0	1
DDX17	0	0	0	0	0	0	1	0	1
RPL3	0	0	0	0	0	0	1	0	1
RBX1	0	0	0	0	0	0	1	0	1
ZC3H7B	0	0	0	0	0	0	1	0	1
KHNYN	0	0	0	0	0	0	1	0	1
PSMC6	0	0	0	0	0	0	1	0	1
VTI1B	0	0	0	0	0	0	1	0	1
SPTLC2	0	0	0	0	0	0	1	0	1
EIF5	0	0	0	0	0	0	1	0	1
ZFYVE21	0	0	0	0	0	0	1	0	1
PABPN1	0	0	0	0	0	0	1	0	1
ARHGAP5	0	0	0	0	0	0	1	0	1
SEC23A	0	0	0	0	0	0	1	0	1
CDS2	0	0	0	0	0	0	1	0	1
RPRD1B	0	0	0	0	0	0	1	0	1
ACOT8	0	0	0	0	0	0	1	0	1
ADNP2	0	0	0	0	0	0	1	0	1
SMAD7	0	0	0	0	0	0	1	0	1
SMARCA1	0	0	0	0	0	0	1	0	1
FLT1	0	0	0	0	0	0	1	0	1
TSC22D1	0	0	0	0	0	0	1	0	1
SLC7A6	0	0	0	0	0	0	1	0	1
SLC7A5	0	0	0	0	0	0	1	0	1
PIEZO1	0	0	0	0	0	0	1	0	1
AAGAB	0	0	0	0	0	0	1	0	1
TMEM87A	0	0	0	0	0	0	1	0	1
TJP1	0	0	0	0	0	0	1	0	1
LAPTM4B	0	0	0	0	0	0	1	0	1
SQLE	0	0	0	0	0	0	1	0	1
SLC39A14	0	0	0	0	0	0	1	0	1
ASAH1	0	0	0	0	0	0	1	0	1
KCNN4	0	0	0	0	0	0	1	0	1
SYDE1	0	0	0	0	0	0	1	0	1
FKBP8	0	0	0	0	0	0	1	0	1
ITGB8	0	0	0	0	0	0	1	0	1
HBP1	0	0	0	0	0	0	1	0	1
TSPAN13	0	0	0	0	0	0	1	0	1
SLC1A1	0	0	0	0	0	0	1	0	1
SETX	0	0	0	0	0	0	1	0	1
DVL1	0	0	0	0	0	0	1	0	1
CCNJ	0	0	0	0	0	0	1	0	1
GATA3	0	0	0	0	0	0	1	0	1
MAPK8	0	0	0	0	0	0	1	0	1
TNKS2	0	0	0	0	0	0	1	0	1
LARP4B	0	0	0	0	0	0	1	0	1
SMC3	0	0	0	0	0	0	1	0	1
SHOC2	0	0	0	0	0	0	1	0	1
UBTF	0	0	0	0	0	0	1	0	1
MTMR4	0	0	0	0	0	0	1	0	1
TRIM37	0	0	0	0	0	0	1	0	1
RAI1	0	0	0	0	0	0	1	0	1
VAT1	0	0	0	0	0	0	1	0	1
LUC7L3	0	0	0	0	0	0	1	0	1
MMD	0	0	0	0	0	0	1	0	1
WSB1	0	0	0	0	0	0	1	0	1
PMP22	0	0	0	0	0	0	1	0	1
DCUN1D4	0	0	0	0	0	0	1	0	1
USP46	0	0	0	0	0	0	1	0	1
TBC1D9	0	0	0	0	0	0	1	0	1
GAB1	0	0	0	0	0	0	1	0	1
CLCN3	0	0	0	0	0	0	1	0	1
PDHX	0	0	0	0	0	0	1	0	1
SOX6	0	0	0	0	0	0	1	0	1
GLI1	0	0	0	0	0	0	1	0	1
METAP2	0	0	0	0	0	0	1	0	1
ELK3	0	0	0	0	0	0	1	0	1
CDK2AP1	0	0	0	0	0	0	1	0	1
SLC38A1	0	0	0	0	0	0	1	0	1
TPI1	0	0	0	0	0	0	1	0	1
COL12A1	0	0	0	0	0	0	1	0	1
SERINC1	0	0	0	0	0	0	1	0	1
MAPK14	0	0	0	0	0	0	1	0	1
SOD2	0	0	0	0	0	0	1	0	1
CCNC	0	0	0	0	0	0	1	0	1
ASCC3	0	0	0	0	0	0	1	0	1
PHACTR2	0	0	0	0	0	0	1	0	1
QKI	0	0	0	0	0	0	1	0	1
PPP2R5D	0	0	0	0	0	0	1	0	1
SENP6	0	0	0	0	0	0	1	0	1
HMGCR	0	0	0	0	0	0	1	0	1
CNOT6	0	0	0	0	0	0	1	0	1
CCNG1	0	0	0	0	0	0	1	0	1
NR3C1	0	0	0	0	0	0	1	0	1
SEC24A	0	0	0	0	0	0	1	0	1
CSNK1A1	0	0	0	0	0	0	1	0	1
STC2	0	0	0	0	0	0	1	0	1
CPEB4	0	0	0	0	0	0	1	0	1
KPNA1	0	0	0	0	0	0	1	0	1
ATP6V1A	0	0	0	0	0	0	1	0	1
SCAP	0	0	0	0	0	0	1	0	1
ABCC5	0	0	0	0	0	0	1	0	1
STAM2	0	0	0	0	0	0	1	0	1
GPD2	0	0	0	0	0	0	1	0	1
GLS	0	0	0	0	0	0	1	0	1
PAPOLG	0	0	0	0	0	0	1	0	1
CHMP3	0	0	0	0	0	0	1	0	1
DCAF17	0	0	0	0	0	0	1	0	1
MARK1	0	0	0	0	0	0	1	0	1
QSOX1	0	0	0	0	0	0	1	0	1
EDEM3	0	0	0	0	0	0	1	0	1
NCF2	0	0	0	0	0	0	1	0	1
OSCP1	0	0	0	0	0	0	1	0	1
EXOC8	0	0	0	0	0	0	1	0	1
AKT3	0	0	0	0	0	0	1	0	1
SSX2IP	0	0	0	0	0	0	1	0	1
APH1A	0	0	0	0	0	0	1	0	1
AKR1A1	0	0	0	0	0	0	1	0	1
DR1	0	0	0	0	0	0	1	0	1
CNN3	0	0	0	0	0	0	1	0	1
RPA2	0	0	0	0	0	0	1	0	1
CAMSAP2	0	0	0	0	0	0	1	0	1
KLF7	0	0	0	0	0	0	1	0	1
DCLRE1B	0	0	0	0	0	0	1	0	1
CCND2	0	0	0	0	0	0	1	0	1
PPP6C	0	0	0	0	0	0	1	0	1
RBM25	0	0	0	0	0	0	1	0	1
ATL2	0	0	0	0	0	0	1	0	1
FAM98A	0	0	0	0	0	0	1	0	1
HELLS	0	0	0	0	0	0	1	0	1
AVPI1	0	0	0	0	0	0	1	0	1
GNA13	0	0	0	0	0	0	1	0	1
EPC1	0	0	0	0	0	0	1	0	1
DNAJC15	0	0	0	0	0	0	1	0	1
TRIM6	0	0	0	0	0	0	1	0	1
TMEM39B	0	0	0	0	0	0	1	0	1
LRIF1	0	0	0	0	0	0	1	0	1
EGR2	0	0	0	0	0	0	1	0	1
IKZF4	0	0	0	0	0	0	1	0	1
LPGAT1	0	0	0	0	0	0	1	0	1
CKS2	0	0	0	0	0	0	1	0	1
ACSL3	0	0	0	0	0	0	1	0	1
SDC4	0	0	0	0	0	0	1	0	1
VAPB	0	0	0	0	0	0	1	0	1
RAB22A	0	0	0	0	0	0	1	0	1
USP22	0	0	0	0	0	0	1	0	1
USP9X	0	0	0	0	0	0	1	0	1
SSR1	0	0	0	0	0	0	1	0	1
IRF1	0	0	0	0	0	0	1	0	1
MIF4GD	0	0	0	0	0	0	1	0	1
THOC2	0	0	0	0	0	0	1	0	1
FLRT3	0	0	0	0	0	0	1	0	1
KLC1	0	0	0	0	0	0	1	0	1
ZBTB1	0	0	0	0	0	0	1	0	1
RHOT1	0	0	0	0	0	0	1	0	1
BCL11B	0	0	0	0	0	0	1	0	1
UBR4	0	0	0	0	0	0	1	0	1
GNAI1	0	0	0	0	0	0	1	0	1
CDC42EP1	0	0	0	0	0	0	1	0	1
DUT	0	0	0	0	0	0	1	0	1
CHAC1	0	0	0	0	0	0	1	0	1
LOXL1	0	0	0	0	0	0	1	0	1
PUS7L	0	0	0	0	0	0	1	0	1
TEP1	0	0	0	0	0	0	1	0	1
SAT1	0	0	0	0	0	0	1	0	1
ACTN4	0	0	0	0	0	0	1	0	1
ZSWIM6	0	0	0	0	0	0	1	0	1
CAMSAP1	0	0	0	0	0	0	1	0	1
EIF2S3	0	0	0	0	0	0	1	0	1
SESN2	0	0	0	0	0	0	1	0	1
CLIP1	0	0	0	0	0	0	1	0	1
ZNF341	0	0	0	0	0	0	1	0	1
KIF3A	0	0	0	0	0	0	1	0	1
ACLY	0	0	0	0	0	0	1	0	1
CHSY1	0	0	0	0	0	0	1	0	1
RAN	0	0	0	0	0	0	1	0	1
UBE2G1	0	0	0	0	0	0	1	0	1
BTBD3	0	0	0	0	0	0	1	0	1
ARHGEF11	0	0	0	0	0	0	1	0	1
SYT11	0	0	0	0	0	0	1	0	1
SERINC3	0	0	0	0	0	0	1	0	1
POMP	0	0	0	0	0	0	1	0	1
MPRIP	0	0	0	0	0	0	1	0	1
STARD13	0	0	0	0	0	0	1	0	1
MED6	0	0	0	0	0	0	1	0	1
TIMM17A	0	0	0	0	0	0	1	0	1
ACP2	0	0	0	0	0	0	1	0	1
PUM1	0	0	0	0	0	0	1	0	1
DTNA	0	0	0	0	0	0	1	0	1
TMEM165	0	0	0	0	0	0	1	0	1
ARGLU1	0	0	0	0	0	0	1	0	1
ARHGAP32	0	0	0	0	0	0	1	0	1
WDR36	0	0	0	0	0	0	1	0	1
UBQLN1	0	0	0	0	0	0	1	0	1
MAP3K7	0	0	0	0	0	0	1	0	1
DYSF	0	0	0	0	0	0	1	0	1
USP15	0	0	0	0	0	0	1	0	1
CEP350	0	0	0	0	0	0	1	0	1
ITM2C	0	0	0	0	0	0	1	0	1
WNT10A	0	0	0	0	0	0	1	0	1
CAB39	0	0	0	0	0	0	1	0	1
SCYL2	0	0	0	0	0	0	1	0	1
FLNB	0	0	0	0	0	0	1	0	1
TNS3	0	0	0	0	0	0	1	0	1
ZDHHC4	0	0	0	0	0	0	1	0	1
BZW2	0	0	0	0	0	0	1	0	1
SRSF1	0	0	0	0	0	0	1	0	1
DCAF7	0	0	0	0	0	0	1	0	1
TANK	0	0	0	0	0	0	1	0	1
SKIL	0	0	0	0	0	0	1	0	1
ENPP2	0	0	0	0	0	0	1	0	1
RANBP6	0	0	0	0	0	0	1	0	1
POLR1E	0	0	0	0	0	0	1	0	1
CNPY3	0	0	0	0	0	0	1	0	1
KIF13A	0	0	0	0	0	0	1	0	1
IRF4	0	0	0	0	0	0	1	0	1
TUBB2A	0	0	0	0	0	0	1	0	1
TCF19	0	0	0	0	0	0	1	0	1
IER3	0	0	0	0	0	0	1	0	1
CPEB2	0	0	0	0	0	0	1	0	1
RAB30	0	0	0	0	0	0	1	0	1
SLTM	0	0	0	0	0	0	1	0	1
THBS1	0	0	0	0	0	0	1	0	1
ADAM10	0	0	0	0	0	0	1	0	1
CYP1B1	0	0	0	0	0	0	1	0	1
PREPL	0	0	0	0	0	0	1	0	1
AOX1	0	0	0	0	0	0	1	0	1
ABI2	0	0	0	0	0	0	1	0	1
PCDH10	0	0	0	0	0	0	1	0	1
G3BP2	0	0	0	0	0	0	1	0	1
SCARB2	0	0	0	0	0	0	1	0	1
CPNE8	0	0	0	0	0	0	1	0	1
ETNK1	0	0	0	0	0	0	1	0	1
SLC7A1	0	0	0	0	0	0	1	0	1
TMBIM6	0	0	0	0	0	0	1	0	1
DENR	0	0	0	0	0	0	1	0	1
NOVA1	0	0	0	0	0	0	1	0	1
RAB15	0	0	0	0	0	0	1	0	1
TSPAN3	0	0	0	0	0	0	1	0	1
DNAJA4	0	0	0	0	0	0	1	0	1
TPM1	0	0	0	0	0	0	1	0	1
ARRDC4	0	0	0	0	0	0	1	0	1
USP3	0	0	0	0	0	0	1	0	1
CHST4	0	0	0	0	0	0	1	0	1
ZCCHC14	0	0	0	0	0	0	1	0	1
RPRD1A	0	0	0	0	0	0	1	0	1
IFITM3	0	0	0	0	0	0	1	0	1
SOD1	0	0	0	0	0	0	1	0	1
PRKACB	0	0	0	0	0	0	1	0	1
MOB3C	0	0	0	0	0	0	1	0	1
LMO4	0	0	0	0	0	0	1	0	1
HDGF	0	0	0	0	0	0	1	0	1
ANP32E	0	0	0	0	0	0	1	0	1
ATP8B2	0	0	0	0	0	0	1	0	1
GALNT2	0	0	0	0	0	0	1	0	1
PDIA6	0	0	0	0	0	0	1	0	1
RHOB	0	0	0	0	0	0	1	0	1
UBR3	0	0	0	0	0	0	1	0	1
HSPD1	0	0	0	0	0	0	1	0	1
COPS7B	0	0	0	0	0	0	1	0	1
SLC25A38	0	0	0	0	0	0	1	0	1
CTDSPL	0	0	0	0	0	0	1	0	1
TMF1	0	0	0	0	0	0	1	0	1
ABHD10	0	0	0	0	0	0	1	0	1
ANK2	0	0	0	0	0	0	1	0	1
SKP2	0	0	0	0	0	0	1	0	1
OSMR	0	0	0	0	0	0	1	0	1
RASA1	0	0	0	0	0	0	1	0	1
BDP1	0	0	0	0	0	0	1	0	1
YIPF5	0	0	0	0	0	0	1	0	1
LRRTM2	0	0	0	0	0	0	1	0	1
TNFRSF21	0	0	0	0	0	0	1	0	1
ARHGAP18	0	0	0	0	0	0	1	0	1
TMEM181	0	0	0	0	0	0	1	0	1
WTAP	0	0	0	0	0	0	1	0	1
PSPH	0	0	0	0	0	0	1	0	1
HAUS6	0	0	0	0	0	0	1	0	1
SURF4	0	0	0	0	0	0	1	0	1
LRRC4C	0	0	0	0	0	0	1	0	1
EIF3M	0	0	0	0	0	0	1	0	1
PTPRJ	0	0	0	0	0	0	1	0	1
SESN3	0	0	0	0	0	0	1	0	1
CHEK1	0	0	0	0	0	0	1	0	1
TAGLN	0	0	0	0	0	0	1	0	1
LATS2	0	0	0	0	0	0	1	0	1
LYPD1	0	0	0	0	0	0	1	0	1
PDCD4	0	0	0	0	0	0	1	0	1
DIXDC1	0	0	0	0	0	0	1	0	1
ITPR1	0	0	0	0	0	0	1	0	1
ANK3	0	0	0	0	0	0	1	0	1
EIF4E	0	0	0	0	0	0	1	0	1
CSNK1G3	0	0	0	0	0	0	1	0	1
ANKRD50	0	0	0	0	0	0	1	0	1
SACS	0	0	0	0	0	0	1	0	1
PTPN14	0	0	0	0	0	0	1	0	1
GUCY1A2	0	0	0	0	0	0	1	0	1
GJA1	0	0	0	0	0	0	1	0	1
SRP19	0	0	0	0	0	0	1	0	1
SCOC	0	0	0	0	0	0	1	0	1
RANBP2	0	0	0	0	0	0	1	0	1
ASAP1	0	0	0	0	0	0	1	0	1
CMIP	0	0	0	0	0	0	1	0	1
CEBPG	0	0	0	0	0	0	1	0	1
CHD1	0	0	0	0	0	0	1	0	1
MSI2	0	0	0	0	0	0	1	0	1
NUS1	0	0	0	0	0	0	1	0	1
ENAH	0	0	0	0	0	0	1	0	1
BUB3	0	0	0	0	0	0	1	0	1
VOPP1	0	0	0	0	0	0	1	0	1
APOOL	0	0	0	0	0	0	1	0	1
PTPRN2	0	0	0	0	0	0	1	0	1
AZIN1	0	0	0	0	0	0	1	0	1
NUP205	0	0	0	0	0	0	1	0	1
GNAQ	0	0	0	0	0	0	1	0	1
NPTN	0	0	0	0	0	0	1	0	1
SAMD8	0	0	0	0	0	0	1	0	1
BAG4	0	0	0	0	0	0	1	0	1
EIF4A2	0	0	0	0	0	0	1	0	1
ZNF618	0	0	0	0	0	0	1	0	1
FMNL2	0	0	0	0	0	0	1	0	1
CUL4B	0	0	0	0	0	0	1	0	1
CDC42SE2	0	0	0	0	0	0	1	0	1
RAPGEF6	0	0	0	0	0	0	1	0	1
IFNGR2	0	0	0	0	0	0	1	0	1
UBE2Z	0	0	0	0	0	0	1	0	1
THEM4	0	0	0	0	0	0	1	0	1
AMFR	0	0	0	0	0	0	1	0	1
RSPRY1	0	0	0	0	0	0	1	0	1
TAOK1	0	0	0	0	0	0	1	0	1
UBE2Q1	0	0	0	0	0	0	1	0	1
PAQR6	0	0	0	0	0	0	1	0	1
IER2	0	0	0	0	0	0	1	0	1
LY6E	0	0	0	0	0	0	1	0	1
SQSTM1	0	0	0	0	0	0	1	0	1
POLR3K	0	0	0	0	0	0	1	0	1
SHANK2	0	0	0	0	0	0	1	0	1
ZNF326	0	0	0	0	0	0	1	0	1
SLC30A7	0	0	0	0	0	0	1	0	1
NCSTN	0	0	0	0	0	0	1	0	1
PDLIM5	0	0	0	0	0	0	1	0	1
CGGBP1	0	0	0	0	0	0	1	0	1
GPR155	0	0	0	0	0	0	1	0	1
HIPK1	0	0	0	0	0	0	1	0	1
CLASP2	0	0	0	0	0	0	1	0	1
NUAK2	0	0	0	0	0	0	1	0	1
WDFY3	0	0	0	0	0	0	1	0	1
PRICKLE2	0	0	0	0	0	0	1	0	1
PPM1K	0	0	0	0	0	0	1	0	1
PTX3	0	0	0	0	0	0	1	0	1
SLMAP	0	0	0	0	0	0	1	0	1
HSPA4L	0	0	0	0	0	0	1	0	1
HMGB2	0	0	0	0	0	0	1	0	1
TMEM161B	0	0	0	0	0	0	1	0	1
ELOVL7	0	0	0	0	0	0	1	0	1
AGGF1	0	0	0	0	0	0	1	0	1
GRPEL2	0	0	0	0	0	0	1	0	1
SFXN1	0	0	0	0	0	0	1	0	1
ZNF12	0	0	0	0	0	0	1	0	1
OSGIN2	0	0	0	0	0	0	1	0	1
YWHAZ	0	0	0	0	0	0	1	0	1
PDP1	0	0	0	0	0	0	1	0	1
ZNF367	0	0	0	0	0	0	1	0	1
ARHGAP12	0	0	0	0	0	0	1	0	1
SUGT1	0	0	0	0	0	0	1	0	1
PGM2L1	0	0	0	0	0	0	1	0	1
REEP3	0	0	0	0	0	0	1	0	1
ARF6	0	0	0	0	0	0	1	0	1
PDZD8	0	0	0	0	0	0	1	0	1
CACNB2	0	0	0	0	0	0	1	0	1
BAG5	0	0	0	0	0	0	1	0	1
TMEM100	0	0	0	0	0	0	1	0	1
TRIM44	0	0	0	0	0	0	1	0	1
IDH3A	0	0	0	0	0	0	1	0	1
TMX3	0	0	0	0	0	0	1	0	1
MFAP4	0	0	0	0	0	0	1	0	1
WEE1	0	0	0	0	0	0	1	0	1
TERF2IP	0	0	0	0	0	0	1	0	1
PATL1	0	0	0	0	0	0	1	0	1
PBX3	0	0	0	0	0	0	1	0	1
TUBA1C	0	0	0	0	0	0	1	0	1
ZNF146	0	0	0	0	0	0	1	0	1
EEF2	0	0	0	0	0	0	1	0	1
TMEM88	0	0	0	0	0	0	1	0	1
SLC3A2	0	0	0	0	0	0	1	0	1
IRF2BP2	0	0	0	0	0	0	1	0	1
SLC20A2	0	0	0	0	0	0	1	0	1
ZBTB5	0	0	0	0	0	0	1	0	1
SNTB2	0	0	0	0	0	0	1	0	1
ZNF507	0	0	0	0	0	0	1	0	1
XPO6	0	0	0	0	0	0	1	0	1
SDC2	0	0	0	0	0	0	1	0	1
PCBP1	0	0	0	0	0	0	1	0	1
FASN	0	0	0	0	0	0	1	0	1
MAP3K2	0	0	0	0	0	0	1	0	1
YWHAG	0	0	0	0	0	0	1	0	1
USP47	0	0	0	0	0	0	1	0	1
ADORA2B	0	0	0	0	0	0	1	0	1
RALGAPB	0	0	0	0	0	0	1	0	1
LONRF2	0	0	0	0	0	0	1	0	1
PPM1D	0	0	0	0	0	0	1	0	1
GPR27	0	0	0	0	0	0	1	0	1
KBTBD2	0	0	0	0	0	0	1	0	1
TANC2	0	0	0	0	0	0	1	0	1
SOCS5	0	0	0	0	0	0	1	0	1
TMEM126B	0	0	0	0	0	0	1	0	1
TRIM8	0	0	0	0	0	0	1	0	1
JMJD1C	0	0	0	0	0	0	1	0	1
NEGR1	0	0	0	0	0	0	1	0	1
GNG12	0	0	0	0	0	0	1	0	1
EFEMP2	0	0	0	0	0	0	1	0	1
DCP2	0	0	0	0	0	0	1	0	1
TADA2B	0	0	0	0	0	0	1	0	1
COQ2	0	0	0	0	0	0	1	0	1
TNKS	0	0	0	0	0	0	1	0	1
DAG1	0	0	0	0	0	0	1	0	1
MOB1B	0	0	0	0	0	0	1	0	1
SCAI	0	0	0	0	0	0	1	0	1
CBX2	0	0	0	0	0	0	1	0	1
FAM174A	0	0	0	0	0	0	1	0	1
LIG4	0	0	0	0	0	0	1	0	1
ZCCHC12	0	0	0	0	0	0	1	0	1
SLC29A2	0	0	0	0	0	0	1	0	1
NR1D2	0	0	0	0	0	0	1	0	1
VCPIP1	0	0	0	0	0	0	1	0	1
SMAD2	0	0	0	0	0	0	1	0	1
LONRF3	0	0	0	0	0	0	1	0	1
SFN	0	0	0	0	0	0	1	0	1
SPRYD4	0	0	0	0	0	0	1	0	1
FAM91A1	0	0	0	0	0	0	1	0	1
PNMA1	0	0	0	0	0	0	1	0	1
RPS6KA3	0	0	0	0	0	0	1	0	1
TGIF1	0	0	0	0	0	0	1	0	1
TBL1XR1	0	0	0	0	0	0	1	0	1
AP3S1	0	0	0	0	0	0	1	0	1
UBE2N	0	0	0	0	0	0	1	0	1
MRFAP1	0	0	0	0	0	0	1	0	1
ZNF664	0	0	0	0	0	0	1	0	1
FJX1	0	0	0	0	0	0	1	0	1
SLITRK4	0	0	0	0	0	0	1	0	1
GCC1	0	0	0	0	0	0	1	0	1
NRXN1	0	0	0	0	0	0	1	0	1
ZNRF2	0	0	0	0	0	0	1	0	1
PAK2	0	0	0	0	0	0	1	0	1
GAS1	0	0	0	0	0	0	1	0	1
DHTKD1	0	0	0	0	0	0	1	0	1
RAP2B	0	0	0	0	0	0	1	0	1
IST1	0	0	0	0	0	0	1	0	1
TTC3	0	0	0	0	0	0	1	0	1
PPP1R27	0	0	0	0	0	0	1	0	1
PAQR7	0	0	0	0	0	0	1	0	1
KIAA2026	0	0	0	0	0	0	1	0	1
FHL3	0	0	0	0	0	0	1	0	1
RIPK4	0	0	0	0	0	0	1	0	1
IQGAP3	0	0	0	0	0	0	1	0	1
DENND5A	0	0	0	0	0	0	1	0	1
PPP1R2	0	0	0	0	0	0	1	0	1
PCDH9	0	0	0	0	0	0	1	0	1
SUMO3	0	0	0	0	0	0	1	0	1
SP1	0	0	0	0	0	0	1	0	1
GNG2	0	0	0	0	0	0	1	0	1
RGS7BP	0	0	0	0	0	0	1	0	1
NF2	0	0	0	0	0	0	1	0	1
ZFP91	0	0	0	0	0	0	1	0	1
HEXIM1	0	0	0	0	0	0	1	0	1
USP7	0	0	0	0	0	0	1	0	1
TET3	0	0	0	0	0	0	1	0	1
CLDN4	0	0	0	0	0	0	1	0	1
LONP1	0	0	0	0	0	0	1	0	1
NCOR2	0	0	0	0	0	0	1	0	1
HDAC2	0	0	0	0	0	0	1	0	1
NF1	0	0	0	0	0	0	1	0	1
PPTC7	0	0	0	0	0	0	1	0	1
SLC39A10	0	0	0	0	0	0	1	0	1
ZNF585A	0	0	0	0	0	0	1	0	1
IGF2R	0	0	0	0	0	0	1	0	1
ENTPD4	0	0	0	0	0	0	1	0	1
PDGFA	0	0	0	0	0	0	1	0	1
MYO5A	0	0	0	0	0	0	1	0	1
PSAP	0	0	0	0	0	0	1	0	1
S100A10	0	0	0	0	0	0	1	0	1
MAK16	0	0	0	0	0	0	1	0	1
CD2AP	0	0	0	0	0	0	1	0	1
MAN1A2	0	0	0	0	0	0	1	0	1
GFPT1	0	0	0	0	0	0	1	0	1
MAFK	0	0	0	0	0	0	1	0	1
TLK1	0	0	0	0	0	0	1	0	1
COPS8	0	0	0	0	0	0	1	0	1
DCAF12	0	0	0	0	0	0	1	0	1
PRC1	0	0	0	0	0	0	1	0	1
HSD17B8	0	0	0	0	0	0	1	0	1
PPP1R11	0	0	0	0	0	0	1	0	1
TCTN1	0	0	0	0	0	0	1	0	1
ITPRIPL2	0	0	0	0	0	0	1	0	1
STK38L	0	0	0	0	0	0	1	0	1
REPIN1	0	0	0	0	0	0	1	0	1
ALG3	0	0	0	0	0	0	1	0	1
FNIP1	0	0	0	0	0	0	1	0	1
PPP3R1	0	0	0	0	0	0	1	0	1
FADS3	0	0	0	0	0	0	1	0	1
PRAF2	0	0	0	0	0	0	1	0	1
ATXN7L3B	0	0	0	0	0	0	1	0	1
ZNF260	0	0	0	0	0	0	1	0	1
MEX3A	0	0	0	0	0	0	1	0	1
EID1	0	0	0	0	0	0	1	0	1
CUX1	0	0	0	0	0	0	1	0	1
RBM15B	0	0	0	0	0	0	1	0	1
TAF9	0	0	0	0	0	0	1	0	1
SYNRG	0	0	0	0	0	0	1	0	1
MARCKS	0	0	0	0	0	0	1	0	1
UNK	0	0	0	0	0	0	0	1	1
PYGB	0	0	0	0	0	0	0	1	1
PIAS4	0	0	0	0	0	0	0	1	1
JUNB	0	0	0	0	0	0	0	1	1
PCYT2	0	0	0	0	0	0	0	1	1

## Sheet: S8 CL Embryo
Target	hsa-miR-1260b & hsa-miR-369-3p	hsa-let-7f-5p & hsa-miR-125b-5p	hsa-miR-128-3p & hsa-miR-216b-5p	hsa-miR-103a-3p & hsa-miR-128-3p	hsa-let-7a-5p & hsa-miR-125b-5p	hsa-miR-204-3p & hsa-miR-215-5p	hsa-miR-30d-5p & hsa-miR-1260b	Sum
UHMK1	1	1	0	1	1	0	1	5
APP	0	1	1	1	1	0	1	5
VCPIP1	1	1	0	0	1	0	1	4
TNPO1	1	0	1	1	0	0	1	4
QKI	1	0	0	1	1	0	1	4
STX16	1	1	0	0	1	0	1	4
TAOK1	1	1	0	0	1	0	1	4
CCNT2	0	1	1	1	1	0	0	4
DYRK2	0	1	1	1	1	0	0	4
LARP1	0	1	1	1	1	0	0	4
RBM12B	0	1	1	1	1	0	0	4
MATR3	0	1	1	1	1	0	0	4
RORA	0	1	1	1	1	0	0	4
XPO1	0	1	0	1	1	0	1	4
CSNK2A1	0	1	1	1	1	0	0	4
CDK6	0	1	1	1	1	0	0	4
DDX6	0	1	1	1	1	0	0	4
FOXM1	0	1	1	1	1	0	0	4
E2F3	0	1	0	1	1	0	1	4
GLS	0	1	1	1	1	0	0	4
MAP1B	0	1	1	1	1	0	0	4
BRD4	0	1	0	1	1	0	1	4
PARP1	0	1	1	0	1	0	1	4
BTG2	0	1	0	1	1	1	0	4
KLHL15	0	1	1	1	1	0	0	4
BMPR2	0	1	1	1	1	0	0	4
CRK	1	1	0	0	1	0	0	3
HIPK1	1	0	0	1	0	0	1	3
MYLIP	1	0	1	0	0	0	1	3
LATS1	1	0	0	1	0	0	1	3
PRDM1	0	1	0	0	1	0	1	3
CDKN1A	0	1	0	1	1	0	0	3
DYNC1LI2	0	1	0	1	1	0	0	3
EIF4G2	0	1	0	1	1	0	0	3
HMGA1	0	1	0	1	1	0	0	3
PLAGL2	0	1	0	1	1	0	0	3
SP1	0	1	0	1	1	0	0	3
TGOLN2	0	1	1	0	1	0	0	3
ZBTB37	0	1	0	1	1	0	0	3
PAFAH1B1	0	1	0	1	1	0	0	3
CSDE1	0	1	0	1	1	0	0	3
IKZF2	0	1	0	0	1	0	1	3
VCAN	0	1	0	1	1	0	0	3
CTNNA1	0	1	0	1	1	0	0	3
SPEN	0	1	0	1	1	0	0	3
TFRC	0	1	0	1	1	0	0	3
STARD7	0	1	0	1	1	0	0	3
REST	0	1	0	1	1	0	0	3
TNRC6A	0	1	1	0	1	0	0	3
DICER1	0	1	0	1	1	0	0	3
YY1	0	1	0	0	1	1	0	3
HBP1	0	1	0	1	1	0	0	3
PLEKHA8	0	1	0	0	1	0	1	3
MED13	0	1	0	1	1	0	0	3
HIPK3	0	1	0	1	1	0	0	3
LMNB1	0	1	0	1	1	0	0	3
ID2	0	1	0	1	1	0	0	3
MTR	0	1	0	0	1	0	1	3
ARID1A	0	1	0	1	1	0	0	3
PLAGL1	0	1	0	1	1	0	0	3
HELLS	0	1	0	1	1	0	0	3
PDS5A	0	1	0	1	1	0	0	3
AHNAK	0	1	0	1	1	0	0	3
CNOT1	0	1	0	1	1	0	0	3
BMP2	0	1	1	0	1	0	0	3
BTBD3	0	1	0	1	1	0	0	3
CDCA8	0	1	0	1	1	0	0	3
LRRC8A	0	1	0	1	1	0	0	3
IRF4	0	1	0	1	1	0	0	3
DUSP6	0	1	0	1	1	0	0	3
TMBIM6	0	1	0	1	1	0	0	3
SBNO1	0	1	0	0	1	0	1	3
SSH2	0	1	1	0	1	0	0	3
TP53	0	1	0	1	1	0	0	3
ABL2	0	1	0	1	1	0	0	3
MBOAT2	0	1	0	1	1	0	0	3
LRIG1	0	1	0	1	1	0	0	3
G3BP1	0	1	0	0	1	0	1	3
MMS22L	0	1	0	1	1	0	0	3
MTDH	0	1	0	1	1	0	0	3
MKI67	0	1	0	1	1	0	0	3
LIN7C	0	1	0	1	1	0	0	3
HNRNPU	0	1	0	1	1	0	0	3
RANBP2	0	1	0	0	1	0	1	3
SON	0	1	0	1	1	0	0	3
WDR26	0	1	0	0	1	0	1	3
EEF2	0	1	0	1	1	0	0	3
RAB4A	0	1	0	1	1	0	0	3
CRTAP	0	1	0	1	1	0	0	3
CDCA4	0	1	0	0	1	0	1	3
LCLAT1	0	1	0	0	1	0	1	3
TRIB1	0	1	0	1	1	0	0	3
AURKB	0	1	0	1	1	0	0	3
EHMT1	0	1	0	1	1	0	0	3
IST1	0	1	0	1	1	0	0	3
ZNF703	0	1	0	1	1	0	0	3
PCDH9	0	1	0	1	1	0	0	3
TSPYL1	0	1	0	0	1	0	1	3
FLNA	0	1	0	1	1	0	0	3
SLC5A3	0	0	1	1	1	0	0	3
NUFIP2	0	0	1	1	0	0	1	3
NUCKS1	0	0	1	1	1	0	0	3
BAZ2A	0	0	1	1	1	0	0	3
ATP13A3	0	0	1	1	0	0	1	3
ARL6IP1	0	0	1	1	0	0	1	3
TMCC1	0	0	1	1	0	0	1	3
TOB2	0	0	1	1	1	0	0	3
SFT2D2	0	0	1	1	0	0	1	3
PURA	1	0	0	1	0	0	0	2
SP3	1	0	0	0	0	0	1	2
TSC22D2	1	0	0	1	0	0	0	2
LHFPL2	1	0	0	0	0	0	1	2
GATAD2B	1	0	0	1	0	0	0	2
ENPP5	1	0	0	0	0	0	1	2
ATAD1	1	0	0	0	0	0	1	2
MAP4	1	0	0	0	0	0	1	2
PPM1A	1	0	0	0	0	0	1	2
SLC38A1	1	0	0	0	0	0	1	2
PHACTR2	1	0	0	0	0	0	1	2
RAB22A	1	0	0	1	0	0	0	2
MPRIP	1	0	0	1	0	0	0	2
RNF44	1	0	0	0	0	0	1	2
PCDH19	1	0	0	0	0	0	1	2
PAFAH1B2	1	0	0	0	0	0	1	2
JMJD1C	1	0	1	0	0	0	0	2
ZMAT3	1	0	0	1	0	0	0	2
KCTD12	1	0	0	0	0	0	1	2
NAP1L1	1	0	0	0	0	0	1	2
NBR1	1	0	0	0	0	0	1	2
HNRNPUL2	1	0	0	0	0	0	1	2
ATXN7L3B	1	0	0	0	0	0	1	2
AMD1	0	1	0	0	1	0	0	2
ATP2A2	0	1	0	0	1	0	0	2
BACH1	0	1	0	0	1	0	0	2
CALU	0	1	0	0	1	0	0	2
CD59	0	1	0	0	1	0	0	2
ARID3A	0	1	0	0	1	0	0	2
EDN1	0	1	0	0	1	0	0	2
EPHA4	0	1	0	0	1	0	0	2
NR6A1	0	1	0	0	1	0	0	2
IGF1R	0	1	0	0	1	0	0	2
IL6R	0	1	0	0	1	0	0	2
MXD1	0	1	0	0	1	0	0	2
MYH9	0	1	0	0	1	0	0	2
SLC11A2	0	1	0	0	1	0	0	2
PMAIP1	0	1	0	0	1	0	0	2
SMARCC1	0	1	0	0	1	0	0	2
SOD2	0	1	0	0	1	0	0	2
STRN	0	1	0	0	1	0	0	2
STX3	0	1	0	0	1	0	0	2
THBS1	0	1	0	0	1	0	0	2
VCL	0	1	0	0	1	0	0	2
ZNF8	0	1	0	0	1	0	0	2
NCOA3	0	1	0	0	1	0	0	2
CLDN12	0	1	0	0	1	0	0	2
ATP6V1G1	0	1	0	0	1	0	0	2
NUP155	0	1	0	0	1	0	0	2
HERPUD1	0	1	0	0	1	0	0	2
SNX17	0	1	0	0	1	0	0	2
UBAP2L	0	1	0	0	1	0	0	2
ARID3B	0	1	0	0	1	0	0	2
IGF2BP1	0	1	0	0	1	0	0	2
HNRNPUL1	0	1	0	0	1	0	0	2
ATXN2L	0	1	0	0	1	0	0	2
IKZF3	0	1	0	0	1	0	0	2
PLXND1	0	1	0	0	1	0	0	2
PLD3	0	1	0	0	1	0	0	2
BCOR	0	1	0	0	1	0	0	2
SEMA4C	0	1	0	0	1	0	0	2
FIGN	0	1	0	0	1	0	0	2
YOD1	0	1	0	0	1	0	0	2
MTUS1	0	1	0	0	1	0	0	2
ADIPOR2	0	1	0	0	1	0	0	2
EDEM3	0	1	0	0	1	0	0	2
FBXL20	0	1	0	0	1	0	0	2
FMNL3	0	1	0	0	1	0	0	2
TRIM71	0	1	0	0	1	0	0	2
TXLNA	0	1	0	0	1	0	0	2
KCTD21	0	1	0	0	1	0	0	2
CDC27	0	1	0	0	1	0	0	2
DHX33	0	1	0	0	1	0	0	2
GDE1	0	1	0	0	1	0	0	2
COX10	0	1	0	0	1	0	0	2
HIVEP2	0	1	0	0	1	0	0	2
LYPLA2	0	1	0	0	1	0	0	2
XYLT2	0	1	0	0	1	0	0	2
RUFY3	0	1	0	0	1	0	0	2
UBR2	0	1	0	0	1	0	0	2
KPNA6	0	1	0	0	1	0	0	2
CHPF2	0	1	0	0	1	0	0	2
UBA6	0	1	0	0	1	0	0	2
DSG2	0	1	0	0	1	0	0	2
TPR	0	1	0	0	1	0	0	2
FAM120A	0	1	0	0	1	0	0	2
CUL1	0	1	0	0	1	0	0	2
RC3H2	0	1	0	0	1	0	0	2
ZC3H11A	0	1	0	0	1	0	0	2
QSER1	0	1	0	0	1	0	0	2
BCAT1	0	1	0	0	1	0	0	2
TNPO3	0	1	0	0	1	0	0	2
CDK13	0	1	0	0	1	0	0	2
SEL1L	0	1	0	0	1	0	0	2
NFATC3	0	1	0	0	1	0	0	2
PICALM	0	1	0	0	1	0	0	2
FNDC3B	0	1	0	0	1	0	0	2
NT5C2	0	1	0	0	1	0	0	2
FGFR1	0	1	0	0	1	0	0	2
TNRC6C	0	1	0	1	0	0	0	2
SENP1	0	1	0	0	1	0	0	2
NFE2L1	0	1	0	0	1	0	0	2
FAT1	0	1	0	0	1	0	0	2
HUWE1	0	1	0	0	1	0	0	2
MTMR2	0	1	0	0	1	0	0	2
TMEM101	0	1	0	0	1	0	0	2
EZR	0	1	0	0	1	0	0	2
ARCN1	0	1	0	0	1	0	0	2
WAC	0	1	0	0	1	0	0	2
SCD	0	1	0	0	1	0	0	2
FBXL19	0	1	0	0	1	0	0	2
CRKL	0	1	0	0	1	0	0	2
DDX17	0	1	0	0	1	0	0	2
AP1B1	0	1	0	0	1	0	0	2
FAM118A	0	1	0	0	1	0	0	2
CHD8	0	1	0	1	0	0	0	2
ZMYND8	0	1	0	0	1	0	0	2
ADNP	0	1	0	0	1	0	0	2
SMAD7	0	1	0	0	1	0	0	2
CDK16	0	1	0	0	1	0	0	2
SLC7A6	0	1	0	0	1	0	0	2
MON1B	0	1	0	0	1	0	0	2
UBE2I	0	1	0	0	1	0	0	2
MAZ	0	1	0	0	1	0	0	2
RAB11A	0	1	0	0	1	0	0	2
HOMER2	0	1	0	0	1	0	0	2
UBE2W	0	1	0	0	1	0	0	2
KDELR1	0	1	0	0	1	0	0	2
CCNJ	0	1	0	0	1	0	0	2
RAB11FIP2	0	1	0	0	1	0	0	2
PLEKHA1	0	1	0	0	1	0	0	2
PPIF	0	1	0	0	1	0	0	2
TSPAN14	0	1	0	0	1	0	0	2
RNF167	0	1	0	0	1	0	0	2
RAPGEF2	0	1	0	0	1	0	0	2
HTATIP2	0	1	0	0	1	0	0	2
PRDM4	0	1	0	0	1	0	0	2
CORO1C	0	1	0	0	1	0	0	2
MLEC	0	1	0	0	1	0	0	2
CSRNP2	0	1	0	0	1	0	0	2
PTGES3	0	1	0	0	1	0	0	2
CDKN1B	0	1	0	0	1	0	0	2
PTP4A1	0	1	0	0	1	0	0	2
SRF	0	1	0	0	1	0	0	2
NNT	0	1	0	0	1	0	0	2
PPP2CA	0	1	0	0	1	0	0	2
SEC24A	0	1	0	0	1	0	0	2
STC2	0	1	0	0	1	0	0	2
MOB1A	0	1	0	0	1	0	0	2
TTL	0	1	0	0	1	0	0	2
ACTR3	0	1	0	0	1	0	0	2
LANCL1	0	1	0	0	1	0	0	2
BCL9	0	1	0	0	1	0	0	2
ETV3	0	1	0	0	1	0	0	2
MAPKAP1	0	1	0	0	1	0	0	2
WDR11	0	1	0	0	1	0	0	2
ETF1	0	1	0	0	1	0	0	2
DUSP4	0	1	0	0	1	0	0	2
GPSM2	0	1	0	0	1	0	0	2
NR4A1	0	1	0	0	1	0	0	2
SOX4	0	1	0	0	1	0	0	2
ATXN1	0	1	0	0	1	0	0	2
MAX	0	1	0	0	1	0	0	2
TUBGCP3	0	1	0	0	1	0	0	2
THRA	0	1	0	0	1	0	0	2
CLN6	0	1	0	0	1	0	0	2
VPS13C	0	1	0	0	1	0	0	2
LDLR	0	1	0	0	1	0	0	2
LRCH2	0	1	0	0	1	0	0	2
ZSWIM6	0	1	0	0	1	0	0	2
EIF2S3	0	1	0	0	1	0	0	2
SYNE1	0	1	0	0	1	0	0	2
ACLY	0	1	0	0	1	0	0	2
SERINC3	0	1	0	0	1	0	0	2
STARD13	0	1	0	0	1	0	0	2
SLC38A2	0	1	0	0	1	0	0	2
APC	0	1	0	0	1	0	0	2
PSAT1	0	1	0	0	1	0	0	2
EPHA7	0	1	0	0	1	0	0	2
CAPRIN1	0	1	0	0	1	0	0	2
VPS36	0	1	0	0	1	0	0	2
RAPGEF5	0	1	0	0	1	0	0	2
VEZF1	0	1	0	0	1	0	0	2
DPM2	0	1	0	0	1	0	0	2
CASP6	0	1	0	0	1	0	0	2
VPS37B	0	1	0	0	1	0	0	2
NCOA2	0	1	0	0	1	0	0	2
GFOD2	0	1	0	0	1	0	0	2
PCTP	0	1	0	0	1	0	0	2
TRIM65	0	1	0	0	1	0	0	2
IGSF3	0	1	0	0	1	0	0	2
POGK	0	1	0	0	1	0	0	2
POU2F1	0	1	0	0	1	0	0	2
ARF1	0	1	0	1	0	0	0	2
GIGYF1	0	1	0	0	1	0	0	2
OGT	0	1	0	0	1	0	0	2
ATP6V1B2	0	1	0	0	1	0	0	2
SIGMAR1	0	1	0	0	1	0	0	2
EIF4EBP2	0	1	0	0	1	0	0	2
TMEM138	0	1	0	0	1	0	0	2
MTMR12	0	1	0	0	1	0	0	2
ANKRD50	0	1	0	0	1	0	0	2
SACS	0	1	0	0	1	0	0	2
DST	0	1	0	0	1	0	0	2
PTPN14	0	1	0	0	1	0	0	2
PTPRD	0	1	0	0	1	0	0	2
CHD1	0	1	0	0	1	0	0	2
ADAMTS1	0	1	0	0	1	0	0	2
PSD3	0	1	0	0	1	0	0	2
TIAM1	0	1	0	0	1	0	0	2
FCHO2	0	1	0	0	1	0	0	2
UBN2	0	1	0	0	1	0	0	2
WASF2	0	1	0	0	1	0	0	2
DEDD	0	1	0	0	1	0	0	2
B4GALT3	0	1	0	0	1	0	0	2
NBEAL2	0	1	0	0	1	0	0	2
ZNF385A	0	1	0	0	1	0	0	2
KIAA1522	0	1	0	0	1	0	0	2
ZNF281	0	1	0	0	1	0	0	2
PEX13	0	1	0	0	1	0	0	2
LRRC58	0	1	0	0	1	0	0	2
SHISA5	0	1	0	0	1	0	0	2
ACSL6	0	1	0	0	1	0	0	2
ZNF12	0	1	0	0	1	0	0	2
DLC1	0	1	0	0	1	0	0	2
TP53INP1	0	1	0	0	1	0	0	2
SLITRK5	0	1	0	0	1	0	0	2
QSOX2	0	1	0	0	1	0	0	2
HIF1AN	0	1	0	0	1	0	0	2
FBN1	0	1	0	0	1	0	0	2
PIP4K2C	0	1	0	0	1	0	0	2
URM1	0	1	0	0	1	0	0	2
IGF2	0	1	0	0	1	0	0	2
CDK12	0	1	0	0	1	0	0	2
SRRM2	0	1	0	0	1	0	0	2
KIF5C	0	1	0	0	1	0	0	2
RFWD3	0	1	0	0	1	0	0	2
STAT3	0	1	0	0	1	0	0	2
TET2	0	1	0	0	1	0	0	2
GFM1	0	1	0	0	1	0	0	2
SIN3A	0	1	0	0	1	0	0	2
CLIC4	0	1	0	0	1	0	0	2
HNRNPF	0	1	0	0	1	0	0	2
MAP3K2	0	1	0	0	1	0	0	2
YWHAG	0	1	0	0	1	0	0	2
PWWP2A	0	1	0	0	1	0	0	2
INSR	0	1	0	0	1	0	0	2
CHD7	0	1	0	0	1	0	0	2
BCL2	0	1	0	0	1	0	0	2
NEGR1	0	1	0	0	1	0	0	2
PPP1CA	0	1	0	0	1	0	0	2
DCP2	0	1	0	0	1	0	0	2
PHF8	0	1	0	0	1	0	0	2
HEG1	0	1	0	0	1	0	0	2
FBXO45	0	1	0	0	1	0	0	2
MGA	0	1	0	0	1	0	0	2
CNTNAP2	0	1	0	0	1	0	0	2
EIF1AD	0	1	0	0	1	0	0	2
B3GNT5	0	1	0	0	1	0	0	2
SEC24C	0	1	0	0	1	0	0	2
ZBTB34	0	1	0	0	1	0	0	2
RIMKLA	0	1	0	0	1	0	0	2
PUS1	0	1	0	0	1	0	0	2
CHD9	0	1	0	0	1	0	0	2
PDE4DIP	0	1	0	0	1	0	0	2
SH2B1	0	1	0	0	1	0	0	2
EIF3K	0	1	0	0	1	0	0	2
GPR157	0	1	0	0	1	0	0	2
ZNF792	0	1	0	0	1	0	0	2
PRKAG1	0	1	0	0	1	0	0	2
NOP10	0	1	0	0	1	0	0	2
CREB3L2	0	1	0	0	1	0	0	2
MFSD5	0	1	0	0	1	0	0	2
ACTG1	0	1	0	0	1	0	0	2
PBX1	0	1	0	0	1	0	0	2
BRWD1	0	1	0	0	1	0	0	2
YTHDF3	0	1	0	0	1	0	0	2
DMWD	0	1	0	0	1	0	0	2
TEAD1	0	1	0	0	1	0	0	2
TET3	0	1	0	0	1	0	0	2
LIN28B	0	1	0	0	1	0	0	2
EIF4EBP1	0	1	0	0	1	0	0	2
NDOR1	0	1	0	0	1	0	0	2
TMEM201	0	1	0	0	1	0	0	2
ZNF292	0	1	0	0	1	0	0	2
ARID2	0	1	0	0	1	0	0	2
TMEM63A	0	1	0	0	1	0	0	2
NCOR2	0	1	0	0	1	0	0	2
C1D	0	1	0	0	1	0	0	2
QRICH1	0	1	0	0	1	0	0	2
PRRC2A	0	1	0	0	1	0	0	2
ZNF805	0	1	0	0	1	0	0	2
RNPS1	0	1	0	0	1	0	0	2
NRAS	0	1	0	0	1	0	0	2
LEPROT	0	1	0	0	1	0	0	2
DDX3X	0	1	0	0	1	0	0	2
PNMA2	0	1	0	0	1	0	0	2
ZNF260	0	1	0	0	1	0	0	2
PRKAA1	0	0	1	1	0	0	0	2
PTEN	0	0	1	1	0	0	0	2
MBTD1	0	0	1	1	0	0	0	2
ZIC5	0	0	1	1	0	0	0	2
ESCO2	0	0	1	1	0	0	0	2
REV3L	0	0	1	1	0	0	0	2
GPRC5A	0	0	1	1	0	0	0	2
NCKAP1	0	0	1	1	0	0	0	2
MCM4	0	0	1	1	0	0	0	2
RTN4	0	0	1	1	0	0	0	2
HNRNPA2B1	0	0	1	1	0	0	0	2
ZWINT	0	0	1	1	0	0	0	2
DIAPH1	0	0	1	1	0	0	0	2
NAB1	0	0	1	1	0	0	0	2
ETNK1	0	0	1	1	0	0	0	2
STOM	0	0	1	1	0	0	0	2
LPCAT1	0	0	1	1	0	0	0	2
PPM1K	0	0	1	1	0	0	0	2
WDR43	0	0	1	1	0	0	0	2
OTUD4	0	0	1	1	0	0	0	2
NSD1	0	0	1	1	0	0	0	2
GATAD2A	0	0	1	1	0	0	0	2
CDK1	0	0	1	1	0	0	0	2
PHC3	0	0	1	1	0	0	0	2
SPTY2D1	0	0	1	1	0	0	0	2
SF3B3	0	0	1	1	0	0	0	2
TBC1D9B	0	0	1	1	0	0	0	2
ASPH	0	0	1	1	0	0	0	2
SLC9A6	0	0	1	1	0	0	0	2
ARF6	0	0	0	1	1	0	0	2
CDC25A	0	0	0	1	1	0	0	2
HOXA3	0	0	0	1	1	0	0	2
SRSF1	0	0	0	1	0	0	1	2
FBXW7	0	0	0	1	0	0	1	2
CREBBP	0	0	0	1	1	0	0	2
NCAPD2	0	0	0	1	1	0	0	2
ENO1	0	0	0	1	0	0	1	2
APLP2	0	0	0	1	0	0	1	2
PXN	0	0	0	1	1	0	0	2
ABL1	0	0	0	1	1	0	0	2
YKT6	0	0	0	1	0	0	1	2
LIFR	0	0	0	1	1	0	0	2
AMOTL2	0	0	0	1	0	0	1	2
BIRC6	0	0	0	1	1	0	0	2
RPA2	0	0	0	1	0	0	1	2
NAA50	0	0	0	1	0	0	1	2
SLC7A1	0	0	0	1	1	0	0	2
ANKRD52	0	0	0	1	0	0	1	2
NPEPPS	0	0	0	1	1	0	0	2
ZNF711	0	0	0	1	0	0	1	2
HNRNPH1	0	0	0	1	0	0	1	2
KCTD16	0	0	0	1	1	0	0	2
PPP1CC	0	0	0	1	0	0	1	2
CD2AP	0	0	0	1	1	0	0	2
UNG	0	0	0	0	1	1	0	2
APBB2	1	0	0	0	0	0	0	1
PRNP	1	0	0	0	0	0	0	1
ABI2	1	0	0	0	0	0	0	1
KIF3A	1	0	0	0	0	0	0	1
NOL8	1	0	0	0	0	0	0	1
MCFD2	1	0	0	0	0	0	0	1
ARHGAP5	1	0	0	0	0	0	0	1
LUC7L3	1	0	0	0	0	0	0	1
YIPF4	1	0	0	0	0	0	0	1
OCRL	1	0	0	0	0	0	0	1
RAB3IP	1	0	0	0	0	0	0	1
RFK	1	0	0	0	0	0	0	1
CDK19	1	0	0	0	0	0	0	1
MMP16	1	0	0	0	0	0	0	1
RBM33	1	0	0	0	0	0	0	1
TUBB	1	0	0	0	0	0	0	1
ATR	0	1	0	0	0	0	0	1
FZD4	0	1	0	0	0	0	0	1
[truncated: 672 more rows]
